# Supplementary material for: A Re-Evaluation of the Swiss Hail Suppression Experiment using Permutation Techniques shows Enhancement of Hail Energies when Seeding
Source: Preprints.org preprint supplement (doi:10.20944/preprints202107.0666.v1), 2021-07-29
Supplement: Supplementary file 1 [file supplementary]

## Sheet: DataHail
Data of the Swiss hail seeding experiment «Main Results of Grossversuch IV»										No.	113	pl seed fact	93				No.	37	seed	34								Hailpad									Autocorrelation
by Federer et al. 1986: J. Appl. Meteor. Climatol. 25, 917-957										No.	140	no-seed	160				No.	46	no-seed	49
										EGR (MJ)	124	wrong s ns					planned	83	total	fact
	duration	>45dBZ			(sc) p	0.00001<p<2				EGR (MJ)	222550	seeded	222426				EGR (MJ)	222550	seeded	222527
	dur. keep >=	0	=minutes		power p=	1	for (sc) p			EGR (MJ)	124107	no-seeded	124230				EGR (MJ)	124107	no-seeded	124129
											346656	total	346656					346656	total
	dur. keep <=	130	130 is max.		threshold sc	0	for sc
						exclusion planned if sc < 1/3
																								sc > 0 =seed
																								hail, seed	no-hail, seed
																								hail, no-seed	no-hail, no-seed
	t last - first						seeding				Cells					Days																					Autocorrelation seeded				Autocorrelation non-seeded				Autocorrelation non-seeded				Ideal sample from normal distribution
	>45 dBZ			predictor		radar	coverage	hailpads	>45 dBZ						time covered		>45 dBZ											Cells, hailpads				Days, hailpads					Radar				Radar				hailpad
Date	duration	duration^P5	seed delay	exp(f)		EGR	sc	EG (MJ)	duration	planned seed	EGR (MJ)	sc	frequency		by seeding		duration	EGR	sc	frequency				Cells fact	EGR (MJ)			EG	sc	frequency		EG	sc	frequency			Cell	cell +1	frequency		Cell	cell +1	frequency		Cell	cell +1	frequency		253 cells
	min.		min.	MJ		MJ		hailpad	min.						min.		min.	MJ										MJ				MJ
25.05.77	128	128	9	488		6767.26	0.24	16671.7	128	1	6'767.26	0.24	1.00		30.72	25.05.77	128	6'767.26	0.24	1.00				78	15	93		16'671.70	0.24	1.00		16'671.70	0.24	1.00			6767.26	101.51	1.00		1'351.89	1.83	0.00		854.96	0.00	0.00		8450
30.05.77	15	15	5	213		101.51	0.66	0	15	1	101.51	0.66	1.00		9.9	30.05.77	163	120.20	0.28	1.00				111	49	160		0.00	0.66	1.00		1'078.95	0.28	1.00			101.51	0.49	1.00		1.83	0.00	1.00		0.00	0.00	1.00		9767
	15	15	6	217		0.49	0.66	73.68	15	1	0.49	0.66	1.00		9.9									59.8	64			73.68	0.66	1.00				0.00			0.49	6.77	1.00		0.00	0.00	1.00		0.00	88.19	1.00		9799
	9	9	10	255		6.77	0.5	0	9	1	6.77	0.50	1.00		4.5													0.00	0.50	1.00				0.00			6.77	0.00	1.00		0.00	82.10	1.00		88.19	54.32	1.00		10468
	48	48	9	1380		0	0.15	0	48	1	0.00	0.15	1.00		7.2													0.00	0.15	1.00				0.00			0.00	11.43	1.00		82.10	0.49	0.00		54.32	152.29	0.00		10718
	6	6	9	321		11.43	0	0	6	1	11.43	0.00	1.00		0													0.00	0.00	1.00				0.00			11.43	0.00	1.00		0.49	14.03	1.00		152.29	0.00	1.00		8191
	70	70	9	8		0	0.21	1005.27	70	1	0.00	0.21	1.00		14.7													1'005.27	0.21	1.00				0.00			0.00	36.71	1.00		14.03	6.17	1.00		0.00	0.00	1.00		8424
10.06.77	65	65	10	5825		36.71	0.19	0	65	1	36.71	0.19	1.00		12.35	10.06.77	65	36.71	0.19	1.00								25.49	0.19	1.00		25.49	0.19	1.00			36.71	0.00	1.00		6.17	1'862.11	1.00		0.00	1'623.45	1.00		9914
18.06.77	4	4	no seeding	52		0	0	25.49	4	1	0.00	0.00	1.00		0	18.06.77	118	17'831.43	0.56	1.00								0.00	0.00	1.00		13'717.42	0.56	1.00			0.00	151.93	1.00		1'862.11	3'532.34	1.00		1'623.45	59.34	1.00		10501
	33	33	7	83		151.93	0.42	484.36	33	1	151.93	0.42	1.00		13.86													484.36	0.42	1.00				0.00			151.93	3.85	1.00		3'532.34	8.30	1.00		59.34	0.00	1.00		9799
	4	4	3	198		3.85	1	0	4	1	3.85	1.00	1.00		4													0.00	1.00	1.00				0.00			3.85	17'675.65	1.00		8.30	0.00	0.00		0.00	0.00	0.00		10355
	77	77	5	1		17675.65	0.63	13233.06	77	1	17'675.65	0.63	1.00		48.51													13'233.06	0.63	1.00				0.00			17675.65	0.00	1.00		0.00	0.00	0.00		0.00	0.00	0.00		9818
04.07.77	4	4	no seeding	2392		0	0	0	4	1	0.00	0.00	1.00		0	04.07.77	4	0.00	0.00	1.00								0.00	0.00	1.00		0.00	0.00	1.00			0.00	0.00	1.00		0.00	42.38	1.00		0.00	0.00	1.00		10156
05.07.77	13	13	-2	344		0	0.33	46.19	13	1	0.00	0.33	1.00		4.29	05.07.77	13	0.00	0.33	1.00								46.19	0.33	1.00		46.19	0.33	1.00			0.00	0.00	1.00		42.38	506.76	0.00		0.00	1'218.72	0.00		9751
08.07.77	33	33	15	252		0	0.14	4.4	33	1	0.00	0.14	1.00		4.62	08.07.77	202	1'757.85	0.30	1.00								4.40	0.14	1.00		460.19	0.30	1.00			0.00	261.43	1.00		506.76	0.00	0.00		1'218.72	0.00	0.00		9098
	27	27	11	108		261.43	0.43	4.4	27	1	261.43	0.43	1.00		11.61													4.40	0.43	1.00				0.00			261.43	1'095.63	1.00		0.00	0.00	1.00		0.00	97.36	1.00		9455
	23	23	0	52		1095.63	0.2	269.52	23	1	1'095.63	0.20	1.00		4.6													269.52	0.20	1.00				0.00			1095.63	2.56	1.00		0.00	0.00	1.00		97.36	0.00	1.00		11205
	25	25	3	1394		2.56	0.2	0	25	1	2.56	0.20	1.00		5													0.00	0.20	1.00				0.00			2.56	55.26	1.00		0.00	6.69	0.00		0.00	373.17	0.00		11620
	13	13	7	545		55.26	0.17	181.87	13	1	55.26	0.17	1.00		2.21													181.87	0.17	1.00				0.00			55.26	11.18	1.00		6.69	5'217.68	0.00		373.17	776.13	0.00		10048
	5	5	no seeding	4722		11.18	0	0	5	1	11.18	0.00	1.00		0													0.00	0.00	1.00				0.00			11.18	161.39	1.00		5'217.68	631.70	1.00		776.13	81.90	1.00		9878
	40	40	4	337		161.39	0.63	0	40	1	161.39	0.63	1.00		25.2													0.00	0.63	1.00				0.00			161.39	42.38	1.00		631.70	1'052.63	1.00		81.90	676.10	1.00		9271
	15	15	6	1525		42.38	0.17	0	15	1	42.38	0.17	1.00		2.55													0.00	0.17	1.00				0.00			42.38	128.02	1.00		1'052.63	21.42	1.00		676.10	81.06	1.00		10115
	21	21	16	28		128.02	0.25	0	21	1	128.02	0.25	1.00		5.25													0.00	0.25	1.00				0.00			128.02	0.00	1.00		21.42	0.00	1.00		81.06	0.00	1.00		12467
07.08.77	0	0	no seeding	4105		0	0	0	0	1	0.00	0.00	1.00		0	07.08.77	40	3'040.18	0.50	1.00								0.00	0.00	1.00		38.49	0.50	1.00			0.00	3'040.18	1.00		0.00	0.00	0.00		0.00	410.95	0.00		10917
	40	40	7	3103		3040.18	0.5	38.49	40	1	3'040.18	0.50	1.00		20													38.49	0.50	1.00				0.00			3040.18	34'543.37	1.00		0.00	13.88	1.00		410.95	13.37	1.00		8678
17.08.77	17	17	6	83		34543.37	0.75	1029.68	17	1	34'543.37	0.75	1.00		12.75	17.08.77	17	34'543.37	0.75	1.00								1'029.68	0.75	1.00		1'029.68	0.75	1.00			34543.37	0.00	1.00		13.88	8'954.29	1.00		13.37	10'722.29	1.00		9885
18.05.78	7	7	10	837		0	0	0	7	1	0.00	0.00	1.00		0	18.05.78	47	0.00	0.56	1.00								0.00	0.00	1.00		0.00	0.56	1.00			0.00	0.00	1.00		8'954.29	2.00	0.00		10'722.29	0.00	0.00		9505
	40	40	9	788		0	0.66	0	40	1	0.00	0.66	1.00		26.4													0.00	0.66	1.00				0.00			0.00	0.00	1.00		2.00	2.03	1.00		0.00	0.00	1.00		9284
22.05.78	8	8	7	92		0	0.5	0	8	1	0.00	0.50	1.00		4	22.05.78	16	0.00	0.25	1.00								0.00	0.50	1.00		0.00	0.25	1.00			0.00	0.00	1.00		2.03	4.47	1.00		0.00	240.63	1.00		10109
	8	8	7	33		0	0	0	8	1	0.00	0.00	1.00		0													0.00	0.00	1.00				0.00			0.00	511.86	1.00		4.47	42.82	0.00		240.63	0.00	0.00		11377
08.06.78	15	15	3	934		511.86	1	131.82	15	1	511.86	1.00	1.00		15	08.06.78	15	511.86	1.00	1.00								131.82	1.00	1.00		131.82	1.00	1.00			511.86	51.98	1.00		42.82	124.21	0.00		0.00	0.00	0.00		10233
30.06.78	40	40	6	55		51.98	0.71	1.25	40	1	51.98	0.71	1.00		28.4	30.06.78	95	280.71	0.51	1.00								1.25	0.71	1.00		191.77	0.51	1.00			51.98	203.38	1.00		124.21	7.17	0.00		0.00	0.00	0.00		7429
	30	30	11	125		203.38	0.38	1.25	30	1	203.38	0.38	1.00		11.4													1.25	0.38	1.00				0.00			203.38	0.82	1.00		7.17	25.05	1.00		0.00	980.15	1.00		9025
	3	3	7	3134		0.82	0	0	3	1	0.82	0.00	1.00		0													0.00	0.00	1.00				0.00			0.82	24.53	1.00		25.05	0.00	1.00		980.15	347.93	1.00		9208
	22	22	6	5167		24.53	0.38	189.27	22	1	24.53	0.38	1.00		8.36													189.27	0.38	1.00				0.00			24.53	63.72	1.00		0.00	0.00	0.00		347.93	0.84	0.00		10173
11.07.78	18	18	22	262		63.72	0	0	18	1	63.72	0.00	1.00		0	11.07.78	99	2'271.95	0.31	1.00								0.00	0.00	1.00		80.86	0.31	1.00			63.72	0.88	1.00		0.00	0.00	1.00		0.84	15.46	1.00		9470
	20	20	5	27		0.88	0.66	0	20	1	0.88	0.66	1.00		13.2													0.00	0.66	1.00				0.00			0.88	2'207.35	1.00		0.00	17'853.31	0.00		15.46	1'964.11	0.00		9969
	61	61	21	5884		2207.35	0.28	80.86	61	1	2'207.35	0.28	1.00		17.08													80.86	0.28	1.00				0.00			2207.35	19'731.06	1.00		17'853.31	24'833.77	1.00		1'964.11	4'387.41	1.00		9672
14.07.78	35	35	9	12088		19731.06	0.5	11721.41	35	1	19'731.06	0.50	1.00		17.5	14.07.78	53	20'673.94	0.50	1.00								11'721.41	0.50	1.00		11'846.22	0.50	1.00			19731.06	942.88	1.00		24'833.77	48.90	1.00		4'387.41	0.00	1.00		8986
	18	18	9	5271		942.88	0.5	124.81	18	1	942.88	0.50	1.00		9													124.81	0.50	1.00				0.00			942.88	1.94	1.00		48.90	14'763.78	0.00		0.00	8'750.49	0.00		10098
03.08.78	22	22	10	67508		1.94	0.4	0	22	1	1.94	0.40	1.00		8.8	03.08.78	22	1.94	0.40	1.00								0.00	0.40	1.00		0.00	0.40	1.00			1.94	10'300.04	1.00		14'763.78	887.91	0.00		8'750.49	0.00	0.00		8434
06.08.78	39	39	1	194		10300.04	0.81	1212.26	39	1	10'300.04	0.81	1.00		31.59	06.08.78	39	10'300.04	0.81	1.00								1'212.26	0.81	1.00		1'212.26	0.81	1.00			10300.04	22'025.47	1.00		887.91	339.36	0.00		0.00	1'143.38	0.00		9065
30.05.79	50	50	-2	6		22025.47	0.82	2939.75	50	1	22'025.47	0.82	1.00		41	30.05.79	64	22'093.19	0.86	1.00								2'939.75	0.82	1.00		3'492.49	0.86	1.00			22025.47	67.72	1.00		339.36	59.95	1.00		1'143.38	441.18	1.00		10000
	14	14	5	27		67.72	1	552.74	14	1	67.72	1.00	1.00		14													552.74	1.00	1.00				0.00			67.72	2'367.47	1.00		59.95	291.95	1.00		441.18	33.43	1.00		10130
10.06.79	48	48	1	79		2367.47	0.9	1682.07	48	1	2'367.47	0.90	1.00		43.2	10.06.79	96	13'195.65	0.87	1.00								1'682.07	0.90	1.00		5'701.01	0.87	1.00			2367.47	10'828.18	1.00		291.95	0.14	1.00		33.43	0.00	1.00		8530
	43	43	5	372		10828.18	0.83	4018.94	43	1	10'828.18	0.83	1.00		35.69													4'018.94	0.83	1.00				0.00			10828.18	0.00	1.00		0.14	33.47	1.00		0.00	0.00	1.00		10964
	5	5	6	100		0	1	0	5	1	0.00	1.00	1.00		5													0.00	1.00	1.00				0.00			0.00	74.19	1.00		33.47	371.41	1.00		0.00	8.78	1.00		11707
06.08.79	18	18	3	459		74.19	0.2	50.85	18	1	74.19	0.20	1.00		3.6	06.08.79	144	3'083.65	0.65	1.00								50.85	0.20	1.00		446.11	0.65	1.00			74.19	2'806.36	1.00		371.41	25.58	1.00		8.78	0.42	1.00		9493
	71	71	3	47		2806.36	0.73	381.01	71	1	2'806.36	0.73	1.00		51.83													381.01	0.73	1.00				0.00			2806.36	69.81	1.00		25.58	41.10	0.00		0.42	0.00	0.00		10047
	35	35	4	93		69.81	0.71	6.27	35	1	69.81	0.71	1.00		24.85													6.27	0.71	1.00				0.00			69.81	133.29	1.00		41.10	933.49	1.00		0.00	83.22	1.00		10410
	20	20	4	9997		133.29	0.63	7.98	20	1	133.29	0.63	1.00		12.6													7.98	0.63	1.00				0.00			133.29	205.44	1.00		933.49	3'260.69	1.00		83.22	225.66	1.00		11623
14.09.79	20	20	3	5653		205.44	0.75	-0.08	20	1	205.44	0.75	1.00		15	14.09.79	67	671.34	0.61	1.00								0.00	0.00	0.00		0.00	0.61	0.00			205.44	236.46	1.00		3'260.69	18.11	1.00		225.66	8.36	1.00		11222
	10	10	4	982		236.46	0.75	-0.08	10	1	236.46	0.75	1.00		7.5													0.00	0.00	0.00				0.00			236.46	229.44	1.00		18.11	0.27	1.00		8.36	0.00	1.00		8964
	37	37	3	6974		229.44	0.5	-0.08	37	1	229.44	0.50	1.00		18.5													0.00	0.00	0.00				0.00			229.44	0.00	1.00		0.27	32.45	1.00		0.00	0.00	1.00		11550
26.05.80	9	9	5	1998		0	0.75	1.76	9	1	0.00	0.75	1.00		6.75	26.05.80	9	0.00	0.75	1.00								1.76	0.75	1.00		1.76	0.75	1.00			0.00	164.67	1.00		32.45	0.38	0.00		0.00	0.00	0.00		9184
26.07.80	29	29	8	110		164.67	0.83	0.88	29	1	164.67	0.83	1.00		24.07	26.07.80	79	407.37	0.47	1.00								0.88	0.83	1.00		17.15	0.47	1.00			164.67	231.76	1.00		0.38	554.57	0.00		0.00	12.32	0.00		11027
	40	40	15	17		231.76	0.33	16.27	40	1	231.76	0.33	1.00		13.2													16.27	0.33	1.00				0.00			231.76	10.94	1.00		554.57	0.00	1.00		12.32	3.52	1.00		10410
	10	10	5	167		10.94	0	0	10	1	10.94	0.00	1.00		0													0.00	0.00	1.00				0.00			10.94	543.57	1.00		0.00	5'013.05	1.00		3.52	1'529.63	1.00		10154
15.08.80	85	85	16	86		543.57	0.71	21.99	85	1	543.57	0.71	1.00		60.35	15.08.80	104	585.95	0.63	1.00								21.99	0.71	1.00		21.99	0.63	1.00			543.57	42.38	1.00		5'013.05	8.78	1.00		1'529.63	0.00	1.00		7421
	19	19	6	125		42.38	0.25	0	19	1	42.38	0.25	1.00		4.75													0.00	0.25	1.00				0.00			42.38	0.00	1.00		8.78	0.92	1.00		0.00	0.00	1.00		11039
19.08.80	13	13	6	407		0	0.66	0	13	1	0.00	0.66	1.00		8.58	19.08.80	78	232.53	0.42	1.00								0.00	0.66	1.00		36.44	0.42	1.00			0.00	0.00	1.00		0.92	6.32	1.00		0.00	0.00	1.00		12419
	5	5	3	11968		0	1	3.09	5	1	0.00	1.00	1.00		5													3.09	1.00	1.00				0.00			0.00	5.82	1.00		6.32	0.95	1.00		0.00	0.00	1.00		10153
	29	29	-4	16318		5.82	0.5	5.64	29	1	5.82	0.50	1.00		14.5													5.64	0.50	1.00				0.00			5.82	224.88	1.00		0.95	0.95	0.00		0.00	0.00	0.00		9382
	23	23	6	156373		224.88	0.2	27.71	23	1	224.88	0.20	1.00		4.6													27.71	0.20	1.00				0.00			224.88	1.83	1.00		0.95	0.00	1.00		0.00	0.00	1.00		9525
	8	8	no seeding	6186		1.83	0	0	8	1	1.83	0.00	1.00		0													0.00	0.00	1.00				0.00			1.83	0.00	1.00		0.00	0.00	1.00		0.00	0.00	1.00		10183
16.05.81	0	0	no seeding	153		0	0	0	0	1	0.00	0.00	1.00		0	16.05.81	0	0.00	0.00	1.00								0.00	0.00	1.00		0.00	0.00	1.00			0.00	0.00	1.00		0.00	69.81	0.00		0.00	383.36	0.00		11012
31.05.81	7	7	7	685		0	0.5	0	7	1	0.00	0.50	1.00		3.5	31.05.81	36	15.61	0.44	1.00								0.00	0.50	1.00		141.28	0.44	1.00			0.00	15.61	1.00		69.81	6.54	1.00		383.36	0.00	1.00		9849
	29	29	5	4722		15.61	0.42	141.28	29	1	15.61	0.42	1.00		12.18													141.28	0.42	1.00				0.00			15.61	1.18	1.00		6.54	35.97	1.00		0.00	331.62	1.00		11121
03.06.81	4	4	6	550		1.18	0	21.11	4	1	1.18	0.00	1.00		0	03.06.81	52	1'133.35	0.84	1.00								21.11	0.00	1.00		732.67	0.84	1.00			1.18	625.41	1.00		35.97	32.45	1.00		331.62	0.00	1.00		9614
	3	3	1	1261		625.41	1	0	3	1	625.41	1.00	1.00		3													0.00	1.00	1.00				0.00			625.41	0.00	1.00		32.45	193.42	0.00		0.00	0.00	0.00		9959
	4	4	3	2864		0	1	0	4	1	0.00	1.00	1.00		4													0.00	1.00	1.00				0.00			0.00	506.76	1.00		193.42	1.23	1.00		0.00	0.00	1.00		11585
	41	41	3	148		506.76	0.89	711.56	41	1	506.76	0.89	1.00		36.49													711.56	0.89	1.00				0.00			506.76	22.34	1.00		1.23	5'270.13	0.00		0.00	1'538.29	0.00		10584
16.06.81	10	10	13	204		22.34	0	113.48	10	1	22.34	0.00	1.00		0	16.06.81	10	22.34	0.00	1.00								113.48	0.00	1.00		113.48	0.00	1.00			22.34	0.36	1.00		5'270.13	71.97	1.00		1'538.29	0.00	1.00		9628
09.07.81	6	6	27	1466		0.36	0	0	6	1	0.36	0.00	1.00		0	09.07.81	124	1'205.12	0.62	1.00								0.00	0.00	1.00		759.95	0.62	1.00			0.36	0.00	1.00		71.97	138.77	0.00		0.00	0.00	0.00		10443
	2	2	no seeding	1510		0	0	0	2	1	0.00	0.00	1.00		0													0.00	0.00	1.00				0.00			0.00	423.11	1.00		138.77	577.25	1.00		0.00	0.00	1.00		8016
	39	39	0	2018		423.11	0.81	276	39	1	423.11	0.81	1.00		31.59													276.00	0.81	1.00				0.00			423.11	35.97	1.00		577.25	1'393.09	0.00		0.00	185.67	0.00		10458
	19	19	-7	250		35.97	1	1.76	19	1	35.97	1.00	1.00		19													1.76	1.00	1.00				0.00			35.97	527.48	1.00		1'393.09	4'490.76	0.00		185.67	18.47	0.00		9246
	38	38	20	120		527.48	0.44	482.19	38	1	527.48	0.44	1.00		16.72													482.19	0.44	1.00				0.00			527.48	218.20	1.00		4'490.76	169.72	1.00		18.47	1.67	1.00		7814
	20	20	11	34		218.2	0.5	0	20	1	218.20	0.50	1.00		10													0.00	0.50	1.00				0.00			218.20	2.94	1.00		169.72	6'184.73	1.00		1.67	2'921.01	1.00		10244
06.08.81	11	11	1	317		2.94	1	0	11	1	2.94	1.00	1.00		11	06.08.81	114	17'427.81	0.63	1.00								0.00	1.00	1.00		923.17	0.63	1.00			2.94	14.49	1.00		6'184.73	6'501.88	1.00		2'921.01	2'071.25	1.00		9188
	6	6	3	130		14.49	0.5	0	6	1	14.49	0.50	1.00		3													0.00	0.50	1.00				0.00			14.49	16'154.24	1.00		6'501.88	0.00	1.00		2'071.25	0.00	1.00		9407
	38	38	4	23		16154.24	0.88	923.17	38	1	16'154.24	0.88	1.00		33.44													923.17	0.88	1.00				0.00			16154.24	8.03	1.00		0.00	952.37	0.00		0.00	391.30	0.00		10815
	39	39	4	28		8.03	0.25	0	39	1	8.03	0.25	1.00		9.75													0.00	0.25	1.00				0.00			8.03	0.00	1.00		952.37	0.00	0.00		391.30	0.00	0.00		10099
	3	3	3	71		0	1	0	3	1	0.00	1.00	1.00		3													0.00	1.00	1.00				0.00			0.00	0.23	1.00		0.00	44.60	1.00		0.00	1.67	1.00		12711
	7	7	4	65		0.23	1	0	7	1	0.23	1.00	1.00		7													0.00	1.00	1.00				0.00			0.23	1'247.88	1.00		44.60	0.00	1.00		1.67	0.00	1.00		11940
	10	10	3	518		1247.88	0.5	0	10	1	1'247.88	0.50	1.00		5													0.00	0.50	1.00				0.00			1247.88	0.00	1.00		0.00	41.95	1.00		0.00	0.00	1.00		11796
08.08.81	11	11	5	60		0	1	0	11	1	0.00	1.00	1.00		11	08.08.81	166	6'576.52	0.52	1.00								0.00	1.00	1.00		1'335.88	0.52	1.00			0.00	402.43	1.00		41.95	0.00	1.00		0.00	0.00	1.00		11604
	25	25	2	159		402.43	0.5	110.97	25	1	402.43	0.50	1.00		12.5													110.97	0.50	1.00				0.00			402.43	5'883.05	1.00		0.00	136.00	1.00		0.00	152.31	1.00		11507
	39	39	8	17		5883.05	0.63	1143.54	39	1	5'883.05	0.63	1.00		24.57													1'143.54	0.63	1.00				0.00			5883.05	0.00	1.00		136.00	0.97	0.00		152.31	0.00	0.00		11435
	4	4	no seeding	37		0	0	0	4	1	0.00	0.00	1.00		0													0.00	0.00	1.00				0.00			0.00	29.27	1.00		0.97	12.87	1.00		0.00	66.86	1.00		11421
	15	15	4	86		29.27	0.33	0	15	1	29.27	0.33	1.00		4.95													0.00	0.33	1.00				0.00			29.27	62.43	1.00		12.87	45.53	1.00		66.86	274.51	1.00		11366
	39	39	4	34		62.43	0.38	0	39	1	62.43	0.38	1.00		14.82													0.00	0.38	1.00				0.00			62.43	199.34	1.00		45.53	0.65	1.00		274.51	0.00	1.00		10919
	33	33	5	270		199.34	0.57	81.37	33	1	199.34	0.57	1.00		18.81													81.37	0.57	1.00				0.00			199.34	1.20	1.00		0.65	0.00	1.00		0.00	0.44	1.00		10839
16.08.81	7	7	8	28		1.2	0.25	0	7	1	1.20	0.25	1.00		1.75	16.08.81	7	1.20	0.25	1.00								0.00	0.25	1.00		0.00	0.25	1.00			1.20	0.00	1.00		0.00	0.00	1.00		0.44	440.71	1.00		10821
09.06.82	15	15	19	156		0	0	-0.08	15	1	0.00	0.00	1.00		0	09.06.82	150	204.33	0.53	1.00								0.00	0.00	0.00		0.00	0.53	0.00			0.00	0.00	1.00		0.00	222.63	0.00		440.71	2'146.38	0.00		10803
	3	3	6	79		0	0	-0.08	3	1	0.00	0.00	1.00		0													0.00	0.00	0.00				0.00			0.00	0.00	1.00		222.63	5.30	1.00		2'146.38	510.69	1.00		10800
	3	3	6	17		0	0	-0.08	3	1	0.00	0.00	1.00		0													0.00	0.00	0.00				0.00			0.00	4.37	1.00		5.30	256.24	0.00		510.69	0.00	0.00		10795
	29	29	4	46		4.37	0.5	-0.08	29	1	4.37	0.50	1.00		14.5													0.00	0.00	0.00				0.00			4.37	0.82	1.00		256.24	2'163.62	1.00		0.00	443.61	1.00		10699
	14	14	8	124		0.82	0.33	-0.08	14	1	0.82	0.33	1.00		4.62													0.00	0.00	0.00				0.00			0.82	134.64	1.00		2'163.62	0.00	1.00		443.61	0.00	1.00		10675
	10	10	3	18		134.64	1	-0.08	10	1	134.64	1.00	1.00		10													0.00	0.00	0.00				0.00			134.64	64.37	1.00		0.00	30.19	1.00		0.00	8.36	1.00		10645
	54	54	3	62		64.37	0.82	-0.08	54	1	64.37	0.82	1.00		44.28													0.00	0.00	0.00				0.00			64.37	0.13	1.00		30.19	0.40	0.00		8.36	758.33	0.00		10634
	15	15	5	24		0.13	0.33	-0.08	15	1	0.13	0.33	1.00		4.95													0.00	0.00	0.00				0.00			0.13	0.00	1.00		0.40	0.00	0.00		758.33	0.00	0.00		10589
	7	7	5	39		0	0.25	-0.08	7	1	0.00	0.25	1.00		1.75													0.00	0.00	0.00				0.00			0.00	1'997.20	1.00		0.00	9.38	0.00		0.00	140.05	0.00		10569
10.06.82	17	17	4	20		1997.2	0.66	-0.08	17	1	1'997.20	0.66	1.00		11.22	10.06.82	140	2'065.39	0.42	1.00								0.00	0.00	0.00		0.00	0.42	0.00			1997.20	7.08	1.00		9.38	0.00	0.00		140.05	72.58	0.00		10508
	59	59	46	112		7.08	0.08	-0.08	59	1	7.08	0.08	1.00		4.72													0.00	0.00	0.00				0.00			7.08	2.82	1.00		0.00	0.00	0.00		72.58	34.31	0.00		10424
	16	16	3	104		2.82	1	-0.08	16	1	2.82	1.00	1.00		16													0.00	0.00	0.00				0.00			2.82	57.56	1.00		0.00	41.10	0.00		34.31	5.28	0.00		10318
	29	29	2	154		57.56	0.75	-0.08	29	1	57.56	0.75	1.00		21.75													0.00	0.00	0.00				0.00			57.56	0.73	1.00		41.10	0.90	1.00		5.28	0.00	1.00		10306
	19	19	8	97		0.73	0.25	-0.08	19	1	0.73	0.25	1.00		4.75													0.00	0.00	0.00				0.00			0.73	37'796.57	1.00		0.90	600.85	1.00		0.00	898.05	1.00		10288
15.07.82	83	83	9	1130		37796.57	0.53	-0.08	83	1	37'796.57	0.53	1.00		43.99	15.07.82	83	37'796.57	0.53	1.00								0.00	0.00	0.00		0.00	0.53	0.00			37796.57	16'316.61	1.00		600.85	0.00	1.00		898.05	2.51	1.00		10282
16.07.82	84	84	12	230960		16316.61	0.56	-0.08	84	1	16'316.61	0.56	1.00		47.04	16.07.82	140	17'694.44	0.61	1.00								0.00	0.00	0.00		0.00	0.61	0.00			16316.61	1.75	1.00		0.00	0.65	1.00		2.51	0.00	1.00		10229
	14	14	6	5597		1.75	0.5	-0.08	14	1	1.75	0.50	1.00		7													0.00	0.00	0.00				0.00			1.75	269.43	1.00		0.65	22.81	1.00		0.00	0.00	1.00		10046
	22	22	3	1002		269.43	0.6	-0.08	22	1	269.43	0.60	1.00		13.2													0.00	0.00	0.00				0.00			269.43	1'106.65	1.00		22.81	5.17	1.00		0.00	0.00	1.00		10025
	20	20	5	2697		1106.65	0.88	-0.08	20	1	1'106.65	0.88	1.00		17.6													0.00	0.00	0.00				0.00							5.17	1.16	1.00		0.00	0.00	1.00		9933
19.07.77	53	53		8		1351.89	0	854.96	53	0	1'351.89	0.00	1.00		0	19.07.77	53	1'351.89	0.00	1.00								854.96	0.00	1.00		854.96	0.00	1.00							1.16	0.00	1.00		0.00	0.00	1.00		9898
21.07.77	6	6		15		1.83	0	0	6	0	1.83	0.00	1.00		0	21.07.77	44	83.93	0.00	1.00								0.00	0.00	1.00		142.51	0.00	1.00							0.00	0.00	0.00		0.00	0.00	0.00		9812
	7	7		31		0	0	0	7	0	0.00	0.00	1.00		0													0.00	0.00	1.00				0.00							0.00	2.90	1.00		0.00	0.00	1.00		9788
	10	10		4		0	0	88.19	10	0	0.00	0.00	1.00		0													88.19	0.00	1.00				0.00							2.90	0.00	1.00		0.00	0.00	1.00		9785
	21	21		327		82.1	0	54.32	21	0	82.10	0.00	1.00		0													54.32	0.00	1.00				0.00							0.00	0.72	1.00		0.00	0.00	1.00		9702
24.06.77	23	23		44		0.49	0	152.29	23	0	0.49	0.00	1.00		0	24.06.77	154	5'423.44	0.00	1.00								152.29	0.00	1.00		1'835.08	0.00	1.00							0.72	0.92	0.00		0.00	0.00	0.00		9701
	33	33		35		14.03	0	0	33	0	14.03	0.00	1.00		0													0.00	0.00	1.00				0.00							0.92	0.67	0.00		0.00	0.00	0.00		9682
	12	12		15		6.17	0	0	12	0	6.17	0.00	1.00		0													0.00	0.00	1.00				0.00							0.67	1'163.45	1.00		0.00	35.18	1.00		9670
	40	40		34		1862.11	0	1623.45	40	0	1'862.11	0.00	1.00		0													1'623.45	0.00	1.00				0.00							1'163.45	0.00	0.00		35.18	0.00	0.00		9534
	12	12		2231		3532.34	0	59.34	12	0	3'532.34	0.00	1.00		0													59.34	0.00	1.00				0.00							0.00	0.00	1.00						9436
	34	34		23		8.3	0	0	34	0	8.30	0.00	1.00		0													0.00	0.00	1.00				0.00							0.00	0.00	1.00						9413
14.07.77	2	2		5		0	0	0	2	0	0.00	0.00	1.00		0	14.07.77	2	0.00	0.00	1.00								0.00	0.00	1.00		0.00	0.00	1.00							0.00	63.07	0.00						9389
16.08.77	4	4		69		0	0	0	4	0	0.00	0.00	1.00		0	16.08.77	12	42.38	0.00	1.00								0.00	0.00	1.00		0.00	0.00	1.00							63.07	131.95	1.00						9289
	8	8		228		42.38	0	0	8	0	42.38	0.00	1.00		0													0.00	0.00	1.00				0.00							131.95	0.72	1.00						9244
18.08.77	62	62		508		506.76	0	1218.72	62	0	506.76	0.00	1.00		0	18.08.77	62	506.76	0.00	1.00								1'218.72	0.00	1.00		1'218.72	0.00	1.00							0.72	0.00	1.00						9200
22.08.77	0	0		6		0	0	0	0	0	0.00	0.00	1.00		0	22.08.77	34	0.00	0.00	1.00								0.00	0.00	1.00		97.36	0.00	1.00							0.00	43.26	1.00						9190
	34	34		1		0	0	97.36	34	0	0.00	0.00	1.00		0													97.36	0.00	1.00				0.00							43.26	0.00	0.00						9156
	0	0		129		0	0	0	0	0	0.00	0.00	1.00		0													0.00	0.00	1.00				0.00							0.00	1.39	1.00						9122
17.05.78	42	42		38		6.69	0	373.17	42	0	6.69	0.00	1.00		0	17.05.78	42	6.69	0.00	1.00								373.17	0.00	1.00		373.17	0.00	1.00							1.39	2.49	1.00						9094
31.05.78	87	87		16		5217.68	0	776.13	87	0	5'217.68	0.00	1.00		0	31.05.78	201	6'923.43	0.00	1.00								776.13	0.00	1.00		1'615.19	0.00	1.00							2.49	63.07	1.00						9093
	52	52		2		631.7	0	81.9	52	0	631.70	0.00	1.00		0													81.90	0.00	1.00				0.00							63.07	0.00	1.00						9068
	34	34		219		1052.63	0	676.1	34	0	1'052.63	0.00	1.00		0													676.10	0.00	1.00				0.00							0.00	0.00	1.00						9045
	9	9		44		21.42	0	81.06	9	0	21.42	0.00	1.00		0													81.06	0.00	1.00				0.00							0.00	0.00	1.00						9026
	19	19		3		0	0	0	19	0	0.00	0.00	1.00		0													0.00	0.00	1.00				0.00							0.00	0.09	1.00						8923
01.06.78	27	27		22		0	0	410.95	27	0	0.00	0.00	1.00		0	01.06.78	98	8'968.17	0.00	1.00								410.95	0.00	1.00		11'146.61	0.00	1.00							0.09	2.90	1.00						8627
	14	14		28		13.88	0	13.37	14	0	13.88	0.00	1.00		0													13.37	0.00	1.00				0.00							2.90	0.00	1.00						8581
	57	57		73		8954.29	0	10722.29	57	0	8'954.29	0.00	1.00		0													10'722.29	0.00	1.00				0.00															8382
03.06.78	8	8		561		2	0	0	8	0	2.00	0.00	1.00		0	03.06.78	17	8.50	0.00	1.00								0.00	0.00	1.00		240.63	0.00	1.00															8041
	8	8		59		2.03	0	0	8	0	2.03	0.00	1.00		0													0.00	0.00	1.00				0.00															7953
	1	1		416		4.47	0	240.63	1	0	4.47	0.00	1.00		0													240.63	0.00	1.00				0.00															7936
06.06.78	10	10		262		42.82	0	0	10	0	42.82	0.00	1.00		0	06.06.78	10	42.82	0.00	1.00								0.00	0.00	1.00		0.00	0.00	1.00															11047
07.06.78	23	23		24		124.21	0	0	23	0	124.21	0.00	1.00		0	07.06.78	23	124.21	0.00	1.00								0.00	0.00	1.00		0.00	0.00	1.00															10982
19.06.78	15	15		93		7.17	0	0	15	0	7.17	0.00	1.00		0	19.06.78	53	32.22	0.00	1.00								0.00	0.00	1.00		1'328.08	0.00	1.00															9277
	38	38		137		25.05	0	980.15	38	0	25.05	0.00	1.00		0													980.15	0.00	1.00				0.00															11145
	0	0		34		0	0	347.93	0	0	0.00	0.00	1.00		0													347.93	0.00	1.00				0.00															9728
25.06.78	0	0		1		0	0	0.84	0	0	0.00	0.00	1.00		0	25.06.78	10	0.00	0.00	1.00								0.84	0.00	1.00		16.30	0.00	1.00															9044
	10	10		5		0	0	15.46	10	0	0.00	0.00	1.00		0													15.46	0.00	1.00				0.00															10774
18.07.78	4	4		403		17853.31	0	1964.11	4	0	17'853.31	0.00	1.00		0	18.07.78	19	42'735.98	0.00	1.00								1'964.11	0.00	1.00		6'351.52	0.00	1.00															10702
	10	10		3395		24833.77	0	4387.41	10	0	24'833.77	0.00	1.00		0													4'387.41	0.00	1.00				0.00															9088
	5	5		337		48.9	0	0	5	0	48.90	0.00	1.00		0													0.00	0.00	1.00				0.00															10702
31.07.78	80	80		38177		14763.78	0	8750.49	80	0	14'763.78	0.00	1.00		0	31.07.78	80	14'763.78	0.00	1.00								8'750.49	0.00	1.00		8'750.49	0.00	1.00															10044
16.08.78	17	17		412504		887.91	0	0	17	0	887.91	0.00	1.00		0	16.08.78	17	887.91	0.00	1.00								0.00	0.00	1.00		0.00	0.00	1.00															10525
05.09.78	73	73		202		339.36	0	1143.38	73	0	339.36	0.00	1.00		0	05.09.78	198	1'121.86	0.00	1.00								1'143.38	0.00	1.00		1'627.19	0.00	1.00															8484
	18	18		347		59.95	0	441.18	18	0	59.95	0.00	1.00		0													441.18	0.00	1.00				0.00															11028
	35	35		230		291.95	0	33.43	35	0	291.95	0.00	1.00		0													33.43	0.00	1.00				0.00															11650
	14	14		30		0.14	0	0	14	0	0.14	0.00	1.00		0													0.00	0.00	1.00				0.00															8548
	19	19		43		33.47	0	0	19	0	33.47	0.00	1.00		0													0.00	0.00	1.00				0.00															10778
	25	25		446		371.41	0	8.78	25	0	371.41	0.00	1.00		0													8.78	0.00	1.00				0.00															10432
	14	14		138		25.58	0	0.42	14	0	25.58	0.00	1.00		0													0.42	0.00	1.00				0.00															12635
02.06.79	15	15		407		41.1	0	0	15	0	41.10	0.00	1.00		0	02.06.79	134	4'286.11	0.00	1.00								0.00	0.00	1.00		317.24	0.00	1.00															10299
	10	10		1737		933.49	0	83.22	10	0	933.49	0.00	1.00		0													83.22	0.00	1.00				0.00															10529
	64	64		192		3260.69	0	225.66	64	0	3'260.69	0.00	1.00		0													225.66	0.00	1.00				0.00															10776
	18	18		172		18.11	0	8.36	18	0	18.11	0.00	1.00		0													8.36	0.00	1.00				0.00															9995
	10	10		31		0.27	0	0	10	0	0.27	0.00	1.00		0													0.00	0.00	1.00				0.00															11803
	17	17		150		32.45	0	0	17	0	32.45	0.00	1.00		0													0.00	0.00	1.00				0.00															8955
04.06.79	28	28		268		0.38	0	0	28	0	0.38	0.00	1.00		0	04.06.79	28	0.38	0.00	1.00								0.00	0.00	1.00		0.00	0.00	1.00															8942
05.06.79	15	15		32		554.57	0	12.32	15	0	554.57	0.00	1.00		0	05.06.79	132	5'584.59	0.00	1.00								12.32	0.00	1.00		1'545.47	0.00	1.00															9711
	7	7		18		0	0	3.52	7	0	0.00	0.00	1.00		0													3.52	0.00	1.00				0.00															11667
	69	69		74		5013.05	0	1529.63	69	0	5'013.05	0.00	1.00		0													1'529.63	0.00	1.00				0.00															11033
	20	20		118		8.78	0	0	20	0	8.78	0.00	1.00		0													0.00	0.00	1.00				0.00															10096
	0	0		34		0.92	0	0	0	0	0.92	0.00	1.00		0													0.00	0.00	1.00				0.00															9750
	15	15		92		6.32	0	0	15	0	6.32	0.00	1.00		0													0.00	0.00	1.00				0.00															8836
	6	6		156		0.95	0	0	6	0	0.95	0.00	1.00		0													0.00	0.00	1.00				0.00															9416
11.06.79	3	3		1130		0.95	0	0	3	0	0.95	0.00	1.00		0	11.06.79	9	0.95	0.00	1.00								0.00	0.00	1.00		0.00	0.00	1.00															9474
	0	0		255		0	0	0	0	0	0.00	0.00	1.00		0													0.00	0.00	1.00				0.00															10290
	6	6		992		0	0	0	6	0	0.00	0.00	1.00		0													0.00	0.00	1.00				0.00															11141
12.06.79	27	27		158		69.81	0	383.36	27	0	69.81	0.00	1.00		0	12.06.79	86	144.77	0.00	1.00								383.36	0.00	1.00		714.98	0.00	1.00															10914
	15	15		1863		6.54	0	0	15	0	6.54	0.00	1.00		0													0.00	0.00	1.00				0.00															8940
	35	35		1339		35.97	0	331.62	35	0	35.97	0.00	1.00		0													331.62	0.00	1.00				0.00															9133
	9	9		2618		32.45	0	0	9	0	32.45	0.00	1.00		0													0.00	0.00	1.00				0.00															9314
24.06.79	5	5		2836		193.42	0	0	5	0	193.42	0.00	1.00		0	24.06.79	10	194.65	0.00	1.00								0.00	0.00	1.00		0.00	0.00	1.00															9174
	5	5		5167		1.23	0	0	5	0	1.23	0.00	1.00		0													0.00	0.00	1.00				0.00															9964
12.07.79	12	12		68872		5270.13	0	1538.29	12	0	5'270.13	0.00	1.00		0	12.07.79	18	5'342.10	0.00	1.00								1'538.29	0.00	1.00		1'538.29	0.00	1.00															9745
	6	6		34		71.97	0	0	6	0	71.97	0.00	1.00		0													0.00	0.00	1.00				0.00															11058
31.07.79	11	11		420		138.77	0	0	11	0	138.77	0.00	1.00		0	31.07.79	22	716.02	0.00	1.00								0.00	0.00	1.00		0.00	0.00	1.00															12095
	11	11		679		577.25	0	0	11	0	577.25	0.00	1.00		0													0.00	0.00	1.00				0.00															8956
03.08.79	35	35		268		1393.09	0	185.67	35	0	1'393.09	0.00	1.00		0	03.08.79	35	1'393.09	0.00	1.00								185.67	0.00	1.00		185.67	0.00	1.00															10608
07.08.79	44	44		757		4490.76	0	18.47	44	0	4'490.76	0.00	1.00		0	07.08.79	188	17'347.09	0.00	1.00								18.47	0.00	1.00		5'012.40	0.00	1.00															9721
	15	15		63		169.72	0	1.67	15	0	169.72	0.00	1.00		0													1.67	0.00	1.00				0.00															9735
	47	47		130		6184.73	0	2921.01	47	0	6'184.73	0.00	1.00		0													2'921.01	0.00	1.00				0.00															10280
	82	82		3569		6501.88	0	2071.25	82	0	6'501.88	0.00	1.00		0													2'071.25	0.00	1.00				0.00															10282
	0	0		25		0	0	0	0	0	0.00	0.00	1.00		0													0.00	0.00	1.00				0.00															11808
09.09.79	29	29		213		952.37	0	391.3	29	0	952.37	0.00	1.00		0	09.09.79	29	952.37	0.00	1.00								391.30	0.00	1.00		391.30	0.00	1.00															9931
21.05.80	0	0		2		0	0	0	0	0	0.00	0.00	1.00		0	21.05.80	91	222.55	0.00	1.00								0.00	0.00	1.00		153.98	0.00	1.00															9691
	20	20		7		44.6	0	1.67	20	0	44.60	0.00	1.00		0													1.67	0.00	1.00				0.00															9092
	29	29		3		0	0	0	29	0	0.00	0.00	1.00		0													0.00	0.00	1.00				0.00															8927
	4	4		62		41.95	0	0	4	0	41.95	0.00	1.00		0													0.00	0.00	1.00				0.00															9460
	4	4		17		0	0	0	4	0	0.00	0.00	1.00		0													0.00	0.00	1.00				0.00															11523
	34	34		4		136	0	152.31	34	0	136.00	0.00	1.00		0													152.31	0.00	1.00				0.00															10140
06.06.80	1	1		113		0.97	0	0	1	0	0.97	0.00	1.00		0	06.06.80	38	60.02	0.00	1.00								0.00	0.00	1.00		782.52	0.00	1.00															10637
	3	3		116		12.87	0	66.86	3	0	12.87	0.00	1.00		0													66.86	0.00	1.00				0.00															9550
	12	12		10		45.53	0	274.51	12	0	45.53	0.00	1.00		0													274.51	0.00	1.00				0.00															9821
	5	5		80		0.65	0	0	5	0	0.65	0.00	1.00		0													0.00	0.00	1.00				0.00															9345
	6	6		88		0	0	0.44	6	0	0.00	0.00	1.00		0													0.44	0.00	1.00				0.00															8669
	11	11		209		0	0	440.71	11	0	0.00	0.00	1.00		0													440.71	0.00	1.00				0.00															10489
15.06.80	14	14		202		222.63	0	2146.38	14	0	222.63	0.00	1.00		0	15.06.80	25	227.93	0.00	1.00								2'146.38	0.00	1.00		2'657.07	0.00	1.00															10825
	11	11		110		5.3	0	510.69	11	0	5.30	0.00	1.00		0													510.69	0.00	1.00				0.00															9986
29.07.80	19	19		6905		256.24	0	0	19	0	256.24	0.00	1.00		0	29.07.80	104	2'450.05	0.00	1.00								0.00	0.00	1.00		451.97	0.00	1.00															12115
	52	52		28283		2163.62	0	443.61	52	0	2'163.62	0.00	1.00		0													443.61	0.00	1.00				0.00															11239
	13	13		5014		0	0	0	13	0	0.00	0.00	1.00		0													0.00	0.00	1.00				0.00															8797
	20	20		8691		30.19	0	8.36	20	0	30.19	0.00	1.00		0													8.36	0.00	1.00				0.00															7319
15.05.81	9	9		27		0.4	0	758.33	9	0	0.40	0.00	1.00		0	15.05.81	9	0.40	0.00	1.00								758.33	0.00	1.00		758.33	0.00	1.00															9325
21.05.81	17	17		556		0	0	0	17	0	0.00	0.00	1.00		0	21.05.81	17	0.00	0.00	1.00								0.00	0.00	1.00		0.00	0.00	1.00															9732
30.05.81	10	10		279		9.38	0	140.05	10	0	9.38	0.00	1.00		0	30.05.81	10	9.38	0.00	1.00								140.05	0.00	1.00		140.05	0.00	1.00															8888
24.06.81	5	5		54		0	0	72.58	5	0	0.00	0.00	1.00		0	24.06.81	5	0.00	0.00	1.00								72.58	0.00	1.00		72.58	0.00	1.00															9629
25.06.81	0	0		314		0	0	34.31	0	0	0.00	0.00	1.00		0	25.06.81	0	0.00	0.00	1.00								34.31	0.00	1.00		34.31	0.00	1.00															10955
10.07.81	39	39		111		41.1	0	5.28	39	0	41.10	0.00	1.00		0	10.07.81	182	672.64	0.00	1.00								5.28	0.00	1.00		905.84	0.00	1.00															9064
	13	13		66		0.9	0	0	13	0	0.90	0.00	1.00		0													0.00	0.00	1.00				0.00															10701
	35	35		20		600.85	0	898.05	35	0	600.85	0.00	1.00		0													898.05	0.00	1.00				0.00															11075
	11	11		37		0	0	2.51	11	0	0.00	0.00	1.00		0													2.51	0.00	1.00				0.00															7839
	18	18		7		0.65	0	0	18	0	0.65	0.00	1.00		0													0.00	0.00	1.00				0.00															10265
	23	23		69		22.81	0	0	23	0	22.81	0.00	1.00		0													0.00	0.00	1.00				0.00															10898
	22	22		56		5.17	0	0	22	0	5.17	0.00	1.00		0													0.00	0.00	1.00				0.00															12105
	16	16		101		1.16	0	0	16	0	1.16	0.00	1.00		0													0.00	0.00	1.00				0.00															10413
	5	5		98		0	0	0	5	0	0.00	0.00	1.00		0													0.00	0.00	1.00				0.00															10614
11.07.81	2	2		53		0	0	0	2	0	0.00	0.00	1.00		0	11.07.81	48	3.62	0.00	1.00								0.00	0.00	1.00		0.00	0.00	1.00															10154
	26	26		78		2.9	0	0	26	0	2.90	0.00	1.00		0													0.00	0.00	1.00				0.00															9831
	0	0		10		0	0	0	0	0	0.00	0.00	1.00		0													0.00	0.00	1.00				0.00															10729
	20	20		125		0.72	0	0	20	0	0.72	0.00	1.00		0													0.00	0.00	1.00				0.00															10871
22.07.81	8	8		36		0.92	0	0	8	0	0.92	0.00	1.00		0	22.07.81	8	0.92	0.00	1.00								0.00	0.00	1.00		0.00	0.00	1.00															9482
31.08.81	2	2		72		0.67	0	0	2	0	0.67	0.00	1.00		0	31.08.81	27	1'164.12	0.00	1.00								0.00	0.00	1.00		35.18	0.00	1.00															9491
	25	25		13		1163.45	0	35.18	25	0	1'163.45	0.00	1.00		0													35.18	0.00	1.00				0.00															8068
02.06.82	18	18		3715		0	0	-0.08	18	0	0.00	0.00	1.00		0	02.06.82	37	0.00	0.00	1.00								0.00	0.00	0.00		0.00	0.00	0.00															10449
	7	7		211		0	0	-0.08	7	0	0.00	0.00	1.00		0													0.00	0.00	0.00				0.00															9530
	12	12		620		0	0	-0.08	12	0	0.00	0.00	1.00		0													0.00	0.00	0.00				0.00															8465
05.06.82	38	38		395		63.07	0	-0.08	38	0	63.07	0.00	1.00		0	05.06.82	158	239.00	0.00	1.00								0.00	0.00	0.00		0.00	0.00	0.00															10021
	67	67		31		131.95	0	-0.08	67	0	131.95	0.00	1.00		0													0.00	0.00	0.00				0.00															10927
	12	12		508		0.72	0	-0.08	12	0	0.72	0.00	1.00		0													0.00	0.00	0.00				0.00															10445
	33	33		29		0	0	-0.08	33	0	0.00	0.00	1.00		0													0.00	0.00	0.00				0.00															9416
	8	8		67		43.26	0	-0.08	8	0	43.26	0.00	1.00		0													0.00	0.00	0.00				0.00															10754
07.06.82	0	0		181		0	0	-0.08	0	0	0.00	0.00	1.00		0	07.06.82	78	69.94	0.00	1.00								0.00	0.00	0.00		0.00	0.00	0.00															10903
	3	3		334		1.39	0	-0.08	3	0	1.39	0.00	1.00		0													0.00	0.00	0.00				0.00															10486
	8	8		633		2.49	0	-0.08	8	0	2.49	0.00	1.00		0													0.00	0.00	0.00				0.00															10652
	38	38		5		63.07	0	-0.08	38	0	63.07	0.00	1.00		0													0.00	0.00	0.00				0.00															9496
	0	0		13		0	0	-0.08	0	0	0.00	0.00	1.00		0													0.00	0.00	0.00				0.00															9464
	8	8		81		0	0	-0.08	8	0	0.00	0.00	1.00		0													0.00	0.00	0.00				0.00															8055
	0	0		6		0	0	-0.08	0	0	0.00	0.00	1.00		0													0.00	0.00	0.00				0.00															9528
	2	2		150		0.09	0	-0.08	2	0	0.09	0.00	1.00		0													0.00	0.00	0.00				0.00															10784
	17	17		1437		2.9	0	-0.08	17	0	2.90	0.00	1.00		0													0.00	0.00	0.00				0.00															9616
	2	2		6		0	0	-0.08	2	0	0.00	0.00	1.00		0													0.00	0.00	0.00				0.00															10278

## Sheet: READ
By courtesy of the author, arminaufdermaur@yahoo.de, without any liability. Copyright by Armin Auf der Maur, CH-6030 Ebikon, Switzerland.
Some explications to the sheets
These spreadsheets contain the data from a hail prevention experiment and a quick approximation to the randomization test
There are five sheets: DataHail, READ, Test, Graph, Calc. The sheet is selected at the bottom.
The sheets are unprotected. If you made an unwanted change, reload the sheet from your internal or external source.
Do not overwrite used cells. Your inputs and choices go into the green cells. You may use void cells.
1. Sheet: DataHail
The sheet DataHail contains the original data from Grossversuch IV, Federer et al. 1986, Main results of Grossversuch IV, JAMC, 25, 917-957
The cells C5 and C7 allow cleaning up with respect to the lifetime of the hail cells, G5 concerning the power p in (sc) p . G7 allows a threshold for sc.
When exporting these data for use in Octave or Matlab etc. the number format should be “general” or “scientific”.
DataHail contains also autocorrelation (columns AJ to AT) and an ideal sample from a normal distribution (AV)
2. Sheet: READ
Explanations
3. Sheet: Test
A four moment approximation (FMA) to the randomization test proposed by Pitman (1937) is realized here.
Pitman (1937), Significance tests which may be applied to samples from any populations. II. The correlation coefficient test, JRSSS, 4, 225-232
A mistake in Pitman's fourth moment was corrected (see cell BS28) .
The input must consist of two sets of data of equal length. Copy and paste special or reference the data somewhere in between A21, B21 and A1020, B1020
Avoid cut (Ctrl X) and paste in cells A11:C1020, it would destroy references.
Column C activates (1) or excludes (void or 0) rows from calculations. Values >1 and non-integer numbers are allowed.
The moments of Y and X are found in AA3:AM5. These moments pertain to the data without correction for bias (population value).
The moments of the permutation distribution are shown in cells N19:N24. The cells N19:N23 contain the formulas.
N24 as well as the formulas are based on the algorithm for the moments shown in BA1:CW30.
The functions BE, G4 or SU and the parameters reproducing the PD and its first 4 moments are given in F14:I28 and explained in G30:G41
The best function with respect to the quadratic error in ?5 and ?6/?6(PD) is chosen for FMA.
Sometimes a combination of BE and G4 can be used to minimize the quadratic error.
The correlation coefficient and the one tailed probability are found in cell G5 and G6.
In cell F13 an alternative value for R can be set to calculate the probability by the different functions shown in F15:L15
The permutation distribution has a minimum and a maximum R. BE and G4 have more or less corresponding limits shown in G27:H28.
For 2x2 tables Yates' correction is applied automatically unless the code 4 is overruled by A5.
The four numbers of a 2x2 contingency are preferably inserted in C11:C14. Numbers in C11:C14 deactivate processing data in A21:C1020.
The probability for the confidence interval based on Fisher’s z is chosen in K2 and L2, the results shown in K4:L8
In H10 you can insert a factor for obtaining 1, 2 or whatsoever multiple standard deviation in J10 to K11, based on z.
The effective sample size in A15 and B15 is derived from the number of scores contributing mainly to the fourth standardized moment β4
4. Sheet: Graph
The green cells A2:H4 enable a selection of what should be shown in the graph which starts at about A8.
The main graph shows the one-sided cumulated probability MIN(P;1-P) for each tail in a logarithmic scale.
Further down, at about A35 the graph is shown with rr as abscissa.
The calculations of P(R) are in the cells P6:Y90, the data for the main graph in AA6:AJ400
For 2x2 tables the Yates correction and a milder correction for FMA is prepared in M9:N12. The corrections produce a gap around R=0.
The exact Fisher solution for 2x2 tables with fixed marginals is calculated in rows A100:L500.
5. Sheet: Calc
The algorithms for the calculation of the four parameters (r, u, a, c) are found in Calc.A5:AS128
The first block A5:AW38 is for BE, A45:CS78 for G4 and A82:AT129 for the calculation of the parameters of SU.
At the end of each block, the moments μ'k of the functions are converted into central moments mk and standardized moments β3 to β6

## Sheet: Test
Four-moment-approximation FMA to the permutation test									confidence interval:	lower value	upper value		N	If Y5 is blank												Y	2.00E+00	3.00E+00	4.00E+00	5.00E+00	6.00E+00		X	2.00E+00	3.00E+00	4.00E+00	5.00E+00	6.00E+00	Correlation
You take full responsability for the use of this unprotected spreadsheet.									set P(CI) >>	2.5%	2.5%		2.53E+002	1		53.65										m1	m2	m3	m4	m5	m6		m1	m2	m3	m4	m5	m6	RAB
The present data range is A21:C1020. For enlargement see C1021													No. of observations													1.37E+03	2.24E+07	5.25E+11	1.53E+16	4.81E+20	1.59E+25		2.12E-01	1.04E-01	4.19E-02	3.39E-02	2.30E-02	1.71E-02	1.87E-01
Blank or set 1 for correlation, 2 for two means, 4 for 2x2 table									Fisher’s Z: R (CI)	0.000	0.000									Calculation of CI (Fisher's z):						Stdy*Stdx	Std	β3	β4	β5	β6			Std	β3	β4	β5	β6
	1	is set if A5 is blank			Corr. coeff. R =	0.1873		slope =	2743.54	0.00	0.00		1 in X	1 in Y		a	b			-1.96E+00	1.31E-01	6.55E-02				1.53E+03	4.73003E+03	4.96E+00	3.05E+01	2.03E+02	1.42E+03			3.23E-01	1.25E+00	3.12E+00	6.55E+00	1.51E+01
Yates correction is set for code 4					Probability P(R) =	0.376%	BE+G4	rr =	3.007	1.00	1.00	n1 =	*	*	= n3	*	*			1.96E+00	6.27E-01	3.04E-01
					One-sided test for the relevant tail			dif =	1582.700	0	0					*	*
For 2x2 table use C11:C14					P(R) =	*	*	intercept =	788.401	1370	1370		0 in X	0 in Y		c	d
Data: Y	X	f					1, 2, 3, ...,· σ =	1	R ± ... σ =	0.1243	0.250	n0 =	160	64	= n4
response	treatment	frequency							rr ± ... σ =	2.067	4.569
1	1								dif ± ... σ =	1050.3	2115.1															0.00E+00	0.00E+00	-0.00E+00	0.00E+00	-0.00E+00	0.00E+00		0.00E+00	0.00E+00	0.00E+00	0.00E+00	0.00E+00	0.00E+00	-0.00E+00
0	1																									0.00E+00	0.00E+00	-0.00E+00	0.00E+00	-0.00E+00	0.00E+00		0.00E+00	0.00E+00	0.00E+00	0.00E+00	0.00E+00	0.00E+00	-0.00E+00
1	0					<< set R and get P. If void, P is calculated for test value R in G5										(n1n2n3n4)^0.5		R(a)	a(R)							0.00E+00	0.00E+00	-0.00E+00	0.00E+00	-0.00E+00	0.00E+00		0.00E+00	0.00E+00	-0.00E+00	0.00E+00	-0.00E+00	0.00E+00	0.00E+00
0	0					BE	G4	SU	BE+G4	t	Fisher‘s Z	Fisher exact		1	=sign(β3)	*		*	*							0.00E+00	0.00E+00	-0.00E+00	0.00E+00	-0.00E+00	0.00E+00		0.00E+00	0.00E+00	-0.00E+00	0.00E+00	-0.00E+00	0.00E+00	0.00E+00
8.3	81.0	= n / β4			P =	0.3745%	0.3825%	*	0.3764753%	0.1392085%	0.13660%	*		1.00E-08	=precision
					Parameters:	see sheet Calc						*	={a, , , }
					r =	6.45E+00	2.17E+00	no solution				Moments of the permutation distribution Ri obtained from all permutations between the variables A and B
outcome	treatment				u =	1.69E+01	1.53E+00	*				mk = central moments of order k for the distribution of random Ri, βk = mk / m2 k/2						see BA1:CW30
Data: y	x	f			d =	1.92E-01	1.63E-01	*				m1 =	0.0000		mean
response	treatment	frequency			c =	6.96E-01	1.45E-01	*				m2 =	0.0040		variance
6.77E+03	2.40E-01	1.00E+00			β3 =	0.39	0.39	*	0.39			β3 =	0.391	=m3/m23/2	skewness											6.77E+03	2.91E+07	1.57E+11	8.48E+14	4.58E+18	2.47E+22		2.40E-01	7.81E-04	2.18E-05	6.10E-07	1.70E-08	4.76E-10	1.51E+02
1.02E+02	6.60E-01	1.00E+00			β4 =	2.99	2.99	*	2.99			β4 =	2.993	=m4/m22	kurtosis	0.1525395076										1.02E+02	1.61E+06	-2.04E+09	2.59E+12	-3.29E+15	4.17E+18		6.60E-01	2.01E-01	8.99E-02	4.03E-02	1.80E-02	8.08E-03	-5.68E+02
4.90E-01	6.60E-01	1.00E+00			β5 =	3.56	3.68	*	3.59			β5 =	3.59	=m5/m25/2												4.90E-01	1.88E+06	-2.57E+09	3.52E+12	-4.82E+15	6.60E+18		6.60E-01	2.01E-01	8.99E-02	4.03E-02	1.80E-02	8.08E-03	-6.14E+02
6.77E+00	5.00E-01	1.00E+00			β6 =	15.96	16.32	*	16.05			β6 =	16.06	=m6/m23												6.77E+00	1.86E+06	-2.53E+09	3.46E+12	-4.71E+15	6.42E+18		5.00E-01	8.29E-02	2.39E-02	6.87E-03	1.98E-03	5.70E-04	-3.93E+02
0.00E+00	1.50E-01	1.00E+00			min. β4	1.15	1.92	3.2724				combBE+G4	0.75													0.00E+00	1.88E+06	-2.57E+09	3.52E+12	-4.83E+15	6.62E+18		1.50E-01	3.85E-03	-2.39E-04	1.48E-05	-9.20E-07	5.71E-08	8.50E+01
1.14E+01	0.00E+00	1.00E+00			max. β4	3.23	3.27					BE. G4 , SU	1													1.14E+01	1.85E+06	-2.51E+09	3.41E+12	-4.63E+15	6.29E+18		0.00E+00	4.50E-02	-9.54E-03	2.02E-03	-4.29E-04	9.09E-05	2.88E+02
0.00E+00	2.10E-01	1.00E+00			min. R	-1.92E-01	-1.63E-01	*				BE+G4	2													0.00E+00	1.88E+06	-2.57E+09	3.52E+12	-4.83E+15	6.62E+18		2.10E-01	4.22E-06	-8.68E-09	1.78E-11	-3.67E-14	7.54E-17	2.82E+00
3.67E+01	1.90E-01	1.00E+00			max. R	5.04E-01	1.00E+00	*																		3.67E+01	1.78E+06	-2.37E+09	3.16E+12	-4.22E+15	5.62E+18		1.90E-01	4.86E-04	-1.07E-05	2.37E-07	-5.22E-09	1.15E-10	2.94E+01
0.00E+00	0.00E+00	1.00E+00																								0.00E+00	1.88E+06	-2.57E+09	3.52E+12	-4.83E+15	6.62E+18		0.00E+00	4.50E-02	-9.54E-03	2.02E-03	-4.29E-04	9.09E-05	2.91E+02
1.52E+02	4.20E-01	1.00E+00				Functions used for the four-moments-approximation																				1.52E+02	1.48E+06	-1.81E+09	2.20E+12	-2.68E+15	3.27E+18		4.20E-01	4.32E-02	8.99E-03	1.87E-03	3.89E-04	8.09E-05	-2.53E+02
3.85E+00	1.00E+00	1.00E+00				Y = [(R - m1) sign(β3) + m1 +d] / c			Y is a linear transformation of R. Parameters d and c.																	3.85E+00	1.87E+06	-2.55E+09	3.49E+12	-4.76E+15	6.51E+18		1.00E+00	6.21E-01	4.89E-01	3.85E-01	3.04E-01	2.39E-01	-1.08E+03
1.77E+04	6.30E-01	1.00E+00				BE: P = betadist(Y; r, u)			additional parameters r and u to adjust for β3 and β4																	1.77E+04	2.66E+08	4.34E+12	7.07E+16	1.15E+21	1.88E+25		6.30E-01	1.75E-01	7.30E-02	3.05E-02	1.28E-02	5.33E-03	6.81E+03
0.00E+00	0.00E+00	1.00E+00				dP/dR = Y r - 1 (1 – Y) u - 1 gamma(r + u) / {c [gamma(r)+gamma(u)]}																				0.00E+00	1.88E+06	-2.57E+09	3.52E+12	-4.83E+15	6.62E+18		0.00E+00	4.50E-02	-9.54E-03	2.02E-03	-4.29E-04	9.09E-05	2.91E+02
0.00E+00	3.30E-01	1.00E+00				G4: P = gammadist(Y r; u)																				0.00E+00	1.88E+06	-2.57E+09	3.52E+12	-4.83E+15	6.62E+18		3.30E-01	1.39E-02	1.64E-03	1.94E-04	2.28E-05	2.69E-06	-1.62E+02
0.00E+00	1.40E-01	1.00E+00				dP/dR = Y r · u - 1 · exp( - Y · r ) abs(r) / [c · gamma(u)]																				0.00E+00	1.88E+06	-2.57E+09	3.52E+12	-4.83E+15	6.62E+18		1.40E-01	5.19E-03	-3.74E-04	2.70E-05	-1.94E-06	1.40E-07	9.87E+01
2.61E+02	4.30E-01	1.00E+00				SU: P = 0.5 + sign(β3) · gammadist{[u + asinh(Y)] ² / r; 0.5} · sign[u + asinh(Y)] / 2																				2.61E+02	1.23E+06	-1.36E+09	1.51E+12	-1.68E+15	1.86E+18		4.30E-01	4.75E-02	1.04E-02	2.26E-03	4.92E-04	1.07E-04	-2.42E+02
1.10E+03	2.00E-01	1.00E+00				dP/dR = exp{ -[(u + asinh(Y)] ² / r} / {c [(Y ² + 1) . r . p] 0.5 }																				1.10E+03	7.54E+04	-2.07E+07	5.68E+09	-1.56E+12	4.28E+14		2.00E-01	1.45E-04	-1.75E-06	2.11E-08	-2.55E-10	3.07E-12	3.31E+00
2.56E+00	2.00E-01	1.00E+00				conventional tests:																				2.56E+00	1.87E+06	-2.56E+09	3.50E+12	-4.78E+15	6.54E+18		2.00E-01	1.45E-04	-1.75E-06	2.11E-08	-2.55E-10	3.07E-12	1.65E+01
5.53E+01	1.70E-01	1.00E+00				Students t: P = T.DIST{R·[(n – 2)/(1 - R²)] 0.5, n - 1, 1}																				5.53E+01	1.73E+06	-2.27E+09	2.99E+12	-3.93E+15	5.17E+18		1.70E-01	1.77E-03	-7.44E-05	3.13E-06	-1.32E-07	5.53E-09	5.53E+01
1.12E+01	0.00E+00	1.00E+00				Fisher‘s Z (for CI): P = NORM.S.DIST{ ln[(1 + R)/(1 - R) · (1 – R 0)/(1 + R 0)] · (n - 3) 0.5 / 2}																				1.12E+01	1.85E+06	-2.51E+09	3.41E+12	-4.64E+15	6.30E+18		0.00E+00	4.50E-02	-9.54E-03	2.02E-03	-4.29E-04	9.09E-05	2.88E+02
1.61E+02	6.30E-01	1.00E+00				Kleinbaum, D. G. and Kupper, L. L., Applied Regression Analysis and Other Multivariable Methods.																				1.61E+02	1.46E+06	-1.77E+09	2.14E+12	-2.58E+15	3.12E+18		6.30E-01	1.75E-01	7.30E-02	3.05E-02	1.28E-02	5.33E-03	-5.05E+02
4.24E+01	1.70E-01	1.00E+00																								4.24E+01	1.76E+06	-2.34E+09	3.11E+12	-4.13E+15	5.48E+18		1.70E-01	1.77E-03	-7.44E-05	3.13E-06	-1.32E-07	5.53E-09	5.58E+01
1.28E+02	2.50E-01	1.00E+00				Version 2021/02/22																				1.28E+02	1.54E+06	-1.92E+09	2.38E+12	-2.96E+15	3.67E+18		2.50E-01	1.44E-03	5.46E-05	2.07E-06	7.87E-08	2.98E-09	-4.71E+01
0.00E+00	0.00E+00	1.00E+00																								0.00E+00	1.88E+06	-2.57E+09	3.52E+12	-4.83E+15	6.62E+18		0.00E+00	4.50E-02	-9.54E-03	2.02E-03	-4.29E-04	9.09E-05	2.91E+02
3.04E+03	5.00E-01	1.00E+00																								3.04E+03	2.79E+06	4.66E+09	7.78E+12	1.30E+16	2.17E+19		5.00E-01	8.29E-02	2.39E-02	6.87E-03	1.98E-03	5.70E-04	4.81E+02
3.45E+04	7.50E-01	1.00E+00																								3.45E+04	1.10E+09	3.65E+13	1.21E+18	4.02E+22	1.33E+27		7.50E-01	2.89E-01	1.56E-01	8.37E-02	4.50E-02	2.42E-02	1.78E+04
0.00E+00	0.00E+00	1.00E+00																								0.00E+00	1.88E+06	-2.57E+09	3.52E+12	-4.83E+15	6.62E+18		0.00E+00	4.50E-02	-9.54E-03	2.02E-03	-4.29E-04	9.09E-05	2.91E+02
0.00E+00	6.60E-01	1.00E+00																								0.00E+00	1.88E+06	-2.57E+09	3.52E+12	-4.83E+15	6.62E+18		6.60E-01	2.01E-01	8.99E-02	4.03E-02	1.80E-02	8.08E-03	-6.14E+02
0.00E+00	5.00E-01	1.00E+00																								0.00E+00	1.88E+06	-2.57E+09	3.52E+12	-4.83E+15	6.62E+18		5.00E-01	8.29E-02	2.39E-02	6.87E-03	1.98E-03	5.70E-04	-3.95E+02
0.00E+00	0.00E+00	1.00E+00																								0.00E+00	1.88E+06	-2.57E+09	3.52E+12	-4.83E+15	6.62E+18		0.00E+00	4.50E-02	-9.54E-03	2.02E-03	-4.29E-04	9.09E-05	2.91E+02
5.12E+02	1.00E+00	1.00E+00																								5.12E+02	7.37E+05	-6.32E+08	5.43E+11	-4.66E+14	4.00E+17		1.00E+00	6.21E-01	4.89E-01	3.85E-01	3.04E-01	2.39E-01	-6.76E+02
5.20E+01	7.10E-01	1.00E+00																								5.20E+01	1.74E+06	-2.29E+09	3.02E+12	-3.98E+15	5.25E+18		7.10E-01	2.48E-01	1.23E-01	6.15E-02	3.06E-02	1.52E-02	-6.56E+02
2.03E+02	3.80E-01	1.00E+00																								2.03E+02	1.36E+06	-1.59E+09	1.85E+12	-2.16E+15	2.52E+18		3.80E-01	2.82E-02	4.74E-03	7.96E-04	1.34E-04	2.24E-05	-1.96E+02
8.20E-01	0.00E+00	1.00E+00																								8.20E-01	1.88E+06	-2.57E+09	3.52E+12	-4.81E+15	6.59E+18		0.00E+00	4.50E-02	-9.54E-03	2.02E-03	-4.29E-04	9.09E-05	2.90E+02
2.45E+01	3.80E-01	1.00E+00																								2.45E+01	1.81E+06	-2.44E+09	3.28E+12	-4.41E+15	5.94E+18		3.80E-01	2.82E-02	4.74E-03	7.96E-04	1.34E-04	2.24E-05	-2.26E+02
6.37E+01	0.00E+00	1.00E+00																								6.37E+01	1.71E+06	-2.23E+09	2.91E+12	-3.81E+15	4.97E+18		0.00E+00	4.50E-02	-9.54E-03	2.02E-03	-4.29E-04	9.09E-05	2.77E+02
8.80E-01	6.60E-01	1.00E+00																								8.80E-01	1.87E+06	-2.57E+09	3.52E+12	-4.81E+15	6.59E+18		6.60E-01	2.01E-01	8.99E-02	4.03E-02	1.80E-02	8.08E-03	-6.13E+02
2.21E+03	2.80E-01	1.00E+00																								2.21E+03	7.01E+05	5.87E+08	4.91E+11	4.11E+14	3.44E+17		2.80E-01	4.62E-03	3.14E-04	2.13E-05	1.45E-06	9.84E-08	5.69E+01
1.97E+04	5.00E-01	1.00E+00																								1.97E+04	3.37E+08	6.19E+12	1.14E+17	2.09E+21	3.83E+25		5.00E-01	8.29E-02	2.39E-02	6.87E-03	1.98E-03	5.70E-04	5.29E+03
9.43E+02	5.00E-01	1.00E+00																								9.43E+02	1.83E+05	-7.80E+07	3.33E+10	-1.42E+13	6.09E+15		5.00E-01	8.29E-02	2.39E-02	6.87E-03	1.98E-03	5.70E-04	-1.23E+02
1.94E+00	4.00E-01	1.00E+00																								1.94E+00	1.87E+06	-2.56E+09	3.50E+12	-4.80E+15	6.56E+18		4.00E-01	3.53E-02	6.64E-03	1.25E-03	2.35E-04	4.41E-05	-2.57E+02
1.03E+04	8.10E-01	1.00E+00																								1.03E+04	7.97E+07	7.12E+11	6.36E+15	5.68E+19	5.07E+23		8.10E-01	3.58E-01	2.14E-01	1.28E-01	7.64E-02	4.57E-02	5.34E+03
2.20E+04	8.20E-01	1.00E+00																								2.20E+04	4.27E+08	8.81E+12	1.82E+17	3.76E+21	7.77E+25		8.20E-01	3.70E-01	2.25E-01	1.37E-01	8.30E-02	5.05E-02	1.26E+04
6.77E+01	1.00E+00	1.00E+00																								6.77E+01	1.70E+06	-2.21E+09	2.88E+12	-3.75E+15	4.88E+18		1.00E+00	6.21E-01	4.89E-01	3.85E-01	3.04E-01	2.39E-01	-1.03E+03
2.37E+03	9.00E-01	1.00E+00																								2.37E+03	9.95E+05	9.92E+08	9.89E+11	9.87E+14	9.84E+17		9.00E-01	4.73E-01	3.26E-01	2.24E-01	1.54E-01	1.06E-01	6.86E+02
1.08E+04	8.30E-01	1.00E+00																								1.08E+04	8.95E+07	8.46E+11	8.00E+15	7.57E+19	7.16E+23		8.30E-01	3.82E-01	2.36E-01	1.46E-01	9.01E-02	5.57E-02	5.84E+03
0.00E+00	1.00E+00	1.00E+00																								0.00E+00	1.88E+06	-2.57E+09	3.52E+12	-4.83E+15	6.62E+18		1.00E+00	6.21E-01	4.89E-01	3.85E-01	3.04E-01	2.39E-01	-1.08E+03
7.42E+01	2.00E-01	1.00E+00																								7.42E+01	1.68E+06	-2.18E+09	2.82E+12	-3.66E+15	4.74E+18		2.00E-01	1.45E-04	-1.75E-06	2.11E-08	-2.55E-10	3.07E-12	1.56E+01
2.81E+03	7.30E-01	1.00E+00																								2.81E+03	2.06E+06	2.96E+09	4.25E+12	6.11E+15	8.77E+18		7.30E-01	2.68E-01	1.39E-01	7.20E-02	3.73E-02	1.93E-02	7.44E+02
6.98E+01	7.10E-01	1.00E+00																								6.98E+01	1.69E+06	-2.20E+09	2.86E+12	-3.72E+15	4.84E+18		7.10E-01	2.48E-01	1.23E-01	6.15E-02	3.06E-02	1.52E-02	-6.48E+02
1.33E+02	6.30E-01	1.00E+00																								1.33E+02	1.53E+06	-1.89E+09	2.34E+12	-2.90E+15	3.58E+18		6.30E-01	1.75E-01	7.30E-02	3.05E-02	1.28E-02	5.33E-03	-5.17E+02
2.05E+02	7.50E-01	1.00E+00																								2.05E+02	1.36E+06	-1.58E+09	1.84E+12	-2.14E+15	2.50E+18		7.50E-01	2.89E-01	1.56E-01	8.37E-02	4.50E-02	2.42E-02	-6.27E+02
2.36E+02	7.50E-01	1.00E+00																								2.36E+02	1.29E+06	-1.46E+09	1.65E+12	-1.87E+15	2.12E+18		7.50E-01	2.89E-01	1.56E-01	8.37E-02	4.50E-02	2.42E-02	-6.10E+02
2.29E+02	5.00E-01	1.00E+00																								2.29E+02	1.30E+06	-1.48E+09	1.69E+12	-1.93E+15	2.20E+18		5.00E-01	8.29E-02	2.39E-02	6.87E-03	1.98E-03	5.70E-04	-3.28E+02
0.00E+00	7.50E-01	1.00E+00																								0.00E+00	1.88E+06	-2.57E+09	3.52E+12	-4.83E+15	6.62E+18		7.50E-01	2.89E-01	1.56E-01	8.37E-02	4.50E-02	2.42E-02	-7.37E+02
1.65E+02	8.30E-01	1.00E+00																								1.65E+02	1.45E+06	-1.75E+09	2.11E+12	-2.55E+15	3.07E+18		8.30E-01	3.82E-01	2.36E-01	1.46E-01	9.01E-02	5.57E-02	-7.45E+02
2.32E+02	3.30E-01	1.00E+00																								2.32E+02	1.30E+06	-1.48E+09	1.68E+12	-1.91E+15	2.18E+18		3.30E-01	1.39E-02	1.64E-03	1.94E-04	2.28E-05	2.69E-06	-1.34E+02
1.09E+01	0.00E+00	1.00E+00																								1.09E+01	1.85E+06	-2.51E+09	3.41E+12	-4.64E+15	6.31E+18		0.00E+00	4.50E-02	-9.54E-03	2.02E-03	-4.29E-04	9.09E-05	2.88E+02
5.44E+02	7.10E-01	1.00E+00																								5.44E+02	6.83E+05	-5.65E+08	4.67E+11	-3.86E+14	3.19E+17		7.10E-01	2.48E-01	1.23E-01	6.15E-02	3.06E-02	1.52E-02	-4.12E+02
4.24E+01	2.50E-01	1.00E+00																								4.24E+01	1.76E+06	-2.34E+09	3.11E+12	-4.13E+15	5.48E+18		2.50E-01	1.44E-03	5.46E-05	2.07E-06	7.87E-08	2.98E-09	-5.04E+01
0.00E+00	6.60E-01	1.00E+00																								0.00E+00	1.88E+06	-2.57E+09	3.52E+12	-4.83E+15	6.62E+18		6.60E-01	2.01E-01	8.99E-02	4.03E-02	1.80E-02	8.08E-03	-6.14E+02
0.00E+00	1.00E+00	1.00E+00																								0.00E+00	1.88E+06	-2.57E+09	3.52E+12	-4.83E+15	6.62E+18		1.00E+00	6.21E-01	4.89E-01	3.85E-01	3.04E-01	2.39E-01	-1.08E+03
5.82E+00	5.00E-01	1.00E+00																								5.82E+00	1.86E+06	-2.54E+09	3.47E+12	-4.73E+15	6.45E+18		5.00E-01	8.29E-02	2.39E-02	6.87E-03	1.98E-03	5.70E-04	-3.93E+02
2.25E+02	2.00E-01	1.00E+00																								2.25E+02	1.31E+06	-1.50E+09	1.72E+12	-1.97E+15	2.26E+18		2.00E-01	1.45E-04	-1.75E-06	2.11E-08	-2.55E-10	3.07E-12	1.38E+01
1.83E+00	0.00E+00	1.00E+00																								1.83E+00	1.87E+06	-2.56E+09	3.51E+12	-4.80E+15	6.56E+18		0.00E+00	4.50E-02	-9.54E-03	2.02E-03	-4.29E-04	9.09E-05	2.90E+02
0.00E+00	0.00E+00	1.00E+00																								0.00E+00	1.88E+06	-2.57E+09	3.52E+12	-4.83E+15	6.62E+18		0.00E+00	4.50E-02	-9.54E-03	2.02E-03	-4.29E-04	9.09E-05	2.91E+02
0.00E+00	5.00E-01	1.00E+00																								0.00E+00	1.88E+06	-2.57E+09	3.52E+12	-4.83E+15	6.62E+18		5.00E-01	8.29E-02	2.39E-02	6.87E-03	1.98E-03	5.70E-04	-3.95E+02
1.56E+01	4.20E-01	1.00E+00																								1.56E+01	1.83E+06	-2.49E+09	3.37E+12	-4.56E+15	6.18E+18		4.20E-01	4.32E-02	8.99E-03	1.87E-03	3.89E-04	8.09E-05	-2.82E+02
1.18E+00	0.00E+00	1.00E+00																								1.18E+00	1.87E+06	-2.57E+09	3.51E+12	-4.81E+15	6.58E+18		0.00E+00	4.50E-02	-9.54E-03	2.02E-03	-4.29E-04	9.09E-05	2.90E+02
6.25E+02	1.00E+00	1.00E+00																								6.25E+02	5.55E+05	-4.13E+08	3.08E+11	-2.29E+14	1.71E+17		1.00E+00	6.21E-01	4.89E-01	3.85E-01	3.04E-01	2.39E-01	-5.87E+02
0.00E+00	1.00E+00	1.00E+00																								0.00E+00	1.88E+06	-2.57E+09	3.52E+12	-4.83E+15	6.62E+18		1.00E+00	6.21E-01	4.89E-01	3.85E-01	3.04E-01	2.39E-01	-1.08E+03
5.07E+02	8.90E-01	1.00E+00																								5.07E+02	7.46E+05	-6.44E+08	5.56E+11	-4.80E+14	4.14E+17		8.90E-01	4.60E-01	3.12E-01	2.11E-01	1.43E-01	9.71E-02	-5.85E+02
2.23E+01	0.00E+00	1.00E+00																								2.23E+01	1.82E+06	-2.45E+09	3.30E+12	-4.45E+15	6.00E+18		0.00E+00	4.50E-02	-9.54E-03	2.02E-03	-4.29E-04	9.09E-05	2.86E+02
3.60E-01	0.00E+00	1.00E+00																								3.60E-01	1.88E+06	-2.57E+09	3.52E+12	-4.82E+15	6.61E+18		0.00E+00	4.50E-02	-9.54E-03	2.02E-03	-4.29E-04	9.09E-05	2.90E+02
0.00E+00	0.00E+00	1.00E+00																								0.00E+00	1.88E+06	-2.57E+09	3.52E+12	-4.83E+15	6.62E+18		0.00E+00	4.50E-02	-9.54E-03	2.02E-03	-4.29E-04	9.09E-05	2.91E+02
4.23E+02	8.10E-01	1.00E+00																								4.23E+02	8.97E+05	-8.49E+08	8.05E+11	-7.62E+14	7.22E+17		8.10E-01	3.58E-01	2.14E-01	1.28E-01	7.64E-02	4.57E-02	-5.66E+02
3.60E+01	1.00E+00	1.00E+00																								3.60E+01	1.78E+06	-2.38E+09	3.17E+12	-4.23E+15	5.64E+18		1.00E+00	6.21E-01	4.89E-01	3.85E-01	3.04E-01	2.39E-01	-1.05E+03
5.27E+02	4.40E-01	1.00E+00																								5.27E+02	7.10E+05	-5.98E+08	5.04E+11	-4.25E+14	3.58E+17		4.40E-01	5.20E-02	1.18E-02	2.70E-03	6.15E-04	1.40E-04	-1.92E+02
2.18E+02	5.00E-01	1.00E+00																								2.18E+02	1.33E+06	-1.53E+09	1.76E+12	-2.03E+15	2.34E+18		5.00E-01	8.29E-02	2.39E-02	6.87E-03	1.98E-03	5.70E-04	-3.32E+02
2.94E+00	1.00E+00	1.00E+00																								2.94E+00	1.87E+06	-2.56E+09	3.49E+12	-4.78E+15	6.53E+18		1.00E+00	6.21E-01	4.89E-01	3.85E-01	3.04E-01	2.39E-01	-1.08E+03
1.45E+01	5.00E-01	1.00E+00																								1.45E+01	1.84E+06	-2.49E+09	3.38E+12	-4.58E+15	6.21E+18		5.00E-01	8.29E-02	2.39E-02	6.87E-03	1.98E-03	5.70E-04	-3.90E+02
1.62E+04	8.80E-01	1.00E+00																								1.62E+04	2.19E+08	3.23E+12	4.78E+16	7.06E+20	1.04E+25		8.80E-01	4.46E-01	2.98E-01	1.99E-01	1.33E-01	8.88E-02	9.87E+03
8.03E+00	2.50E-01	1.00E+00																								8.03E+00	1.86E+06	-2.53E+09	3.44E+12	-4.69E+15	6.39E+18		2.50E-01	1.44E-03	5.46E-05	2.07E-06	7.87E-08	2.98E-09	-5.17E+01
0.00E+00	1.00E+00	1.00E+00																								0.00E+00	1.88E+06	-2.57E+09	3.52E+12	-4.83E+15	6.62E+18		1.00E+00	6.21E-01	4.89E-01	3.85E-01	3.04E-01	2.39E-01	-1.08E+03
2.30E-01	1.00E+00	1.00E+00																								2.30E-01	1.88E+06	-2.57E+09	3.52E+12	-4.83E+15	6.61E+18		1.00E+00	6.21E-01	4.89E-01	3.85E-01	3.04E-01	2.39E-01	-1.08E+03
1.25E+03	5.00E-01	1.00E+00																								1.25E+03	1.50E+04	-1.83E+06	2.24E+08	-2.74E+10	3.35E+12		5.00E-01	8.29E-02	2.39E-02	6.87E-03	1.98E-03	5.70E-04	-3.52E+01
0.00E+00	1.00E+00	1.00E+00																								0.00E+00	1.88E+06	-2.57E+09	3.52E+12	-4.83E+15	6.62E+18		1.00E+00	6.21E-01	4.89E-01	3.85E-01	3.04E-01	2.39E-01	-1.08E+03
4.02E+02	5.00E-01	1.00E+00																								4.02E+02	9.37E+05	-9.06E+08	8.77E+11	-8.49E+14	8.21E+17		5.00E-01	8.29E-02	2.39E-02	6.87E-03	1.98E-03	5.70E-04	-2.79E+02
5.88E+03	6.30E-01	1.00E+00																								5.88E+03	2.04E+07	9.19E+10	4.15E+14	1.87E+18	8.45E+21		6.30E-01	1.75E-01	7.30E-02	3.05E-02	1.28E-02	5.33E-03	1.89E+03
0.00E+00	0.00E+00	1.00E+00																								0.00E+00	1.88E+06	-2.57E+09	3.52E+12	-4.83E+15	6.62E+18		0.00E+00	4.50E-02	-9.54E-03	2.02E-03	-4.29E-04	9.09E-05	2.91E+02
2.93E+01	3.30E-01	1.00E+00																								2.93E+01	1.80E+06	-2.41E+09	3.23E+12	-4.34E+15	5.81E+18		3.30E-01	1.39E-02	1.64E-03	1.94E-04	2.28E-05	2.69E-06	-1.58E+02
6.24E+01	3.80E-01	1.00E+00																								6.24E+01	1.71E+06	-2.24E+09	2.92E+12	-3.82E+15	5.00E+18		3.80E-01	2.82E-02	4.74E-03	7.96E-04	1.34E-04	2.24E-05	-2.20E+02
1.99E+02	5.70E-01	1.00E+00																								1.99E+02	1.37E+06	-1.61E+09	1.88E+12	-2.20E+15	2.58E+18		5.70E-01	1.28E-01	4.59E-02	1.64E-02	5.88E-03	2.10E-03	-4.19E+02
1.20E+00	2.50E-01	1.00E+00																								1.20E+00	1.87E+06	-2.57E+09	3.51E+12	-4.81E+15	6.58E+18		2.50E-01	1.44E-03	5.46E-05	2.07E-06	7.87E-08	2.98E-09	-5.19E+01
0.00E+00	0.00E+00	1.00E+00																								0.00E+00	1.88E+06	-2.57E+09	3.52E+12	-4.83E+15	6.62E+18		0.00E+00	4.50E-02	-9.54E-03	2.02E-03	-4.29E-04	9.09E-05	2.91E+02
0.00E+00	0.00E+00	1.00E+00																								0.00E+00	1.88E+06	-2.57E+09	3.52E+12	-4.83E+15	6.62E+18		0.00E+00	4.50E-02	-9.54E-03	2.02E-03	-4.29E-04	9.09E-05	2.91E+02
0.00E+00	0.00E+00	1.00E+00																								0.00E+00	1.88E+06	-2.57E+09	3.52E+12	-4.83E+15	6.62E+18		0.00E+00	4.50E-02	-9.54E-03	2.02E-03	-4.29E-04	9.09E-05	2.91E+02
4.37E+00	5.00E-01	1.00E+00																								4.37E+00	1.87E+06	-2.55E+09	3.48E+12	-4.75E+15	6.49E+18		5.00E-01	8.29E-02	2.39E-02	6.87E-03	1.98E-03	5.70E-04	-3.93E+02
8.20E-01	3.30E-01	1.00E+00																								8.20E-01	1.88E+06	-2.57E+09	3.52E+12	-4.81E+15	6.59E+18		3.30E-01	1.39E-02	1.64E-03	1.94E-04	2.28E-05	2.69E-06	-1.62E+02
1.35E+02	1.00E+00	1.00E+00																								1.35E+02	1.53E+06	-1.89E+09	2.33E+12	-2.88E+15	3.56E+18		1.00E+00	6.21E-01	4.89E-01	3.85E-01	3.04E-01	2.39E-01	-9.74E+02
6.44E+01	8.20E-01	1.00E+00																								6.44E+01	1.71E+06	-2.23E+09	2.91E+12	-3.80E+15	4.96E+18		8.20E-01	3.70E-01	2.25E-01	1.37E-01	8.30E-02	5.05E-02	-7.94E+02
1.30E-01	3.30E-01	1.00E+00																								1.30E-01	1.88E+06	-2.57E+09	3.52E+12	-4.83E+15	6.61E+18		3.30E-01	1.39E-02	1.64E-03	1.94E-04	2.28E-05	2.69E-06	-1.62E+02
0.00E+00	2.50E-01	1.00E+00																								0.00E+00	1.88E+06	-2.57E+09	3.52E+12	-4.83E+15	6.62E+18		2.50E-01	1.44E-03	5.46E-05	2.07E-06	7.87E-08	2.98E-09	-5.20E+01
2.00E+03	6.60E-01	1.00E+00																								2.00E+03	3.93E+05	2.47E+08	1.55E+11	9.69E+13	6.08E+16		6.60E-01	2.01E-01	8.99E-02	4.03E-02	1.80E-02	8.08E-03	2.81E+02
7.08E+00	8.00E-02	1.00E+00																								7.08E+00	1.86E+06	-2.53E+09	3.45E+12	-4.71E+15	6.41E+18		8.00E-02	1.74E-02	-2.30E-03	3.04E-04	-4.02E-05	5.30E-06	1.80E+02
2.82E+00	1.00E+00	1.00E+00																								2.82E+00	1.87E+06	-2.56E+09	3.50E+12	-4.78E+15	6.54E+18		1.00E+00	6.21E-01	4.89E-01	3.85E-01	3.04E-01	2.39E-01	-1.08E+03
5.76E+01	7.50E-01	1.00E+00																								5.76E+01	1.72E+06	-2.26E+09	2.97E+12	-3.90E+15	5.11E+18		7.50E-01	2.89E-01	1.56E-01	8.37E-02	4.50E-02	2.42E-02	-7.06E+02
7.30E-01	2.50E-01	1.00E+00																								7.30E-01	1.88E+06	-2.57E+09	3.52E+12	-4.82E+15	6.60E+18		2.50E-01	1.44E-03	5.46E-05	2.07E-06	7.87E-08	2.98E-09	-5.20E+01
3.78E+04	5.30E-01	1.00E+00																								3.78E+04	1.33E+09	4.83E+13	1.76E+18	6.41E+22	2.34E+27		5.30E-01	1.01E-01	3.21E-02	1.02E-02	3.25E-03	1.03E-03	1.16E+04
1.63E+04	5.60E-01	1.00E+00																								1.63E+04	2.23E+08	3.34E+12	4.99E+16	7.46E+20	1.11E+25		5.60E-01	1.21E-01	4.21E-02	1.47E-02	5.10E-03	1.77E-03	5.20E+03
1.75E+00	5.00E-01	1.00E+00																								1.75E+00	1.87E+06	-2.56E+09	3.51E+12	-4.80E+15	6.57E+18		5.00E-01	8.29E-02	2.39E-02	6.87E-03	1.98E-03	5.70E-04	-3.94E+02
2.69E+02	6.00E-01	1.00E+00																								2.69E+02	1.21E+06	-1.33E+09	1.47E+12	-1.62E+15	1.78E+18		6.00E-01	1.51E-01	5.84E-02	2.27E-02	8.79E-03	3.41E-03	-4.27E+02
1.11E+03	8.80E-01	1.00E+00																								1.11E+03	6.94E+04	-1.83E+07	4.82E+09	-1.27E+12	3.35E+14		8.80E-01	4.46E-01	2.98E-01	1.99E-01	1.33E-01	8.88E-02	-1.76E+02
1.35E+03	0.00E+00	1.00E+00																								1.35E+03	3.35E+02	-6.12E+03	1.12E+05	-2.05E+06	3.75E+07		0.00E+00	4.50E-02	-9.54E-03	2.02E-03	-4.29E-04	9.09E-05	3.88E+00
1.83E+00	0.00E+00	1.00E+00																								1.83E+00	1.87E+06	-2.56E+09	3.51E+12	-4.80E+15	6.56E+18		0.00E+00	4.50E-02	-9.54E-03	2.02E-03	-4.29E-04	9.09E-05	2.90E+02
0.00E+00	0.00E+00	1.00E+00																								0.00E+00	1.88E+06	-2.57E+09	3.52E+12	-4.83E+15	6.62E+18		0.00E+00	4.50E-02	-9.54E-03	2.02E-03	-4.29E-04	9.09E-05	2.91E+02
0.00E+00	0.00E+00	1.00E+00																								0.00E+00	1.88E+06	-2.57E+09	3.52E+12	-4.83E+15	6.62E+18		0.00E+00	4.50E-02	-9.54E-03	2.02E-03	-4.29E-04	9.09E-05	2.91E+02
8.21E+01	0.00E+00	1.00E+00																								8.21E+01	1.66E+06	-2.14E+09	2.75E+12	-3.55E+15	4.57E+18		0.00E+00	4.50E-02	-9.54E-03	2.02E-03	-4.29E-04	9.09E-05	2.73E+02
4.90E-01	0.00E+00	1.00E+00																								4.90E-01	1.88E+06	-2.57E+09	3.52E+12	-4.82E+15	6.60E+18		0.00E+00	4.50E-02	-9.54E-03	2.02E-03	-4.29E-04	9.09E-05	2.90E+02
1.40E+01	0.00E+00	1.00E+00																								1.40E+01	1.84E+06	-2.49E+09	3.38E+12	-4.59E+15	6.22E+18		0.00E+00	4.50E-02	-9.54E-03	2.02E-03	-4.29E-04	9.09E-05	2.88E+02
6.17E+00	0.00E+00	1.00E+00																								6.17E+00	1.86E+06	-2.54E+09	3.46E+12	-4.72E+15	6.44E+18		0.00E+00	4.50E-02	-9.54E-03	2.02E-03	-4.29E-04	9.09E-05	2.89E+02
1.86E+03	0.00E+00	1.00E+00																								1.86E+03	2.42E+05	1.19E+08	5.86E+10	2.88E+13	1.42E+16		0.00E+00	4.50E-02	-9.54E-03	2.02E-03	-4.29E-04	9.09E-05	-1.04E+02
3.53E+03	0.00E+00	1.00E+00																								3.53E+03	4.67E+06	1.01E+10	2.19E+13	4.73E+16	1.02E+20		0.00E+00	4.50E-02	-9.54E-03	2.02E-03	-4.29E-04	9.09E-05	-4.58E+02
8.30E+00	0.00E+00	1.00E+00																								8.30E+00	1.85E+06	-2.53E+09	3.44E+12	-4.68E+15	6.38E+18		0.00E+00	4.50E-02	-9.54E-03	2.02E-03	-4.29E-04	9.09E-05	2.89E+02
0.00E+00	0.00E+00	1.00E+00																								0.00E+00	1.88E+06	-2.57E+09	3.52E+12	-4.83E+15	6.62E+18		0.00E+00	4.50E-02	-9.54E-03	2.02E-03	-4.29E-04	9.09E-05	2.91E+02
0.00E+00	0.00E+00	1.00E+00																								0.00E+00	1.88E+06	-2.57E+09	3.52E+12	-4.83E+15	6.62E+18		0.00E+00	4.50E-02	-9.54E-03	2.02E-03	-4.29E-04	9.09E-05	2.91E+02
4.24E+01	0.00E+00	1.00E+00																								4.24E+01	1.76E+06	-2.34E+09	3.11E+12	-4.13E+15	5.48E+18		0.00E+00	4.50E-02	-9.54E-03	2.02E-03	-4.29E-04	9.09E-05	2.82E+02
5.07E+02	0.00E+00	1.00E+00																								5.07E+02	7.46E+05	-6.44E+08	5.56E+11	-4.80E+14	4.14E+17		0.00E+00	4.50E-02	-9.54E-03	2.02E-03	-4.29E-04	9.09E-05	1.83E+02
0.00E+00	0.00E+00	1.00E+00																								0.00E+00	1.88E+06	-2.57E+09	3.52E+12	-4.83E+15	6.62E+18		0.00E+00	4.50E-02	-9.54E-03	2.02E-03	-4.29E-04	9.09E-05	2.91E+02
0.00E+00	0.00E+00	1.00E+00																								0.00E+00	1.88E+06	-2.57E+09	3.52E+12	-4.83E+15	6.62E+18		0.00E+00	4.50E-02	-9.54E-03	2.02E-03	-4.29E-04	9.09E-05	2.91E+02
0.00E+00	0.00E+00	1.00E+00																								0.00E+00	1.88E+06	-2.57E+09	3.52E+12	-4.83E+15	6.62E+18		0.00E+00	4.50E-02	-9.54E-03	2.02E-03	-4.29E-04	9.09E-05	2.91E+02
6.69E+00	0.00E+00	1.00E+00																								6.69E+00	1.86E+06	-2.53E+09	3.46E+12	-4.71E+15	6.43E+18		0.00E+00	4.50E-02	-9.54E-03	2.02E-03	-4.29E-04	9.09E-05	2.89E+02
5.22E+03	0.00E+00	1.00E+00																								5.22E+03	1.48E+07	5.70E+10	2.19E+14	8.43E+17	3.24E+21		0.00E+00	4.50E-02	-9.54E-03	2.02E-03	-4.29E-04	9.09E-05	-8.16E+02
6.32E+02	0.00E+00	1.00E+00																								6.32E+02	5.45E+05	-4.03E+08	2.97E+11	-2.20E+14	1.62E+17		0.00E+00	4.50E-02	-9.54E-03	2.02E-03	-4.29E-04	9.09E-05	1.57E+02
1.05E+03	0.00E+00	1.00E+00																								1.05E+03	1.01E+05	-3.20E+07	1.02E+10	-3.23E+12	1.03E+15		0.00E+00	4.50E-02	-9.54E-03	2.02E-03	-4.29E-04	9.09E-05	6.73E+01
2.14E+01	0.00E+00	1.00E+00																								2.14E+01	1.82E+06	-2.45E+09	3.31E+12	-4.46E+15	6.02E+18		0.00E+00	4.50E-02	-9.54E-03	2.02E-03	-4.29E-04	9.09E-05	2.86E+02
0.00E+00	0.00E+00	1.00E+00																								0.00E+00	1.88E+06	-2.57E+09	3.52E+12	-4.83E+15	6.62E+18		0.00E+00	4.50E-02	-9.54E-03	2.02E-03	-4.29E-04	9.09E-05	2.91E+02
0.00E+00	0.00E+00	1.00E+00																								0.00E+00	1.88E+06	-2.57E+09	3.52E+12	-4.83E+15	6.62E+18		0.00E+00	4.50E-02	-9.54E-03	2.02E-03	-4.29E-04	9.09E-05	2.91E+02
1.39E+01	0.00E+00	1.00E+00																								1.39E+01	1.84E+06	-2.50E+09	3.38E+12	-4.59E+15	6.23E+18		0.00E+00	4.50E-02	-9.54E-03	2.02E-03	-4.29E-04	9.09E-05	2.88E+02
8.95E+03	0.00E+00	1.00E+00																								8.95E+03	5.75E+07	4.36E+11	3.31E+15	2.51E+19	1.90E+23		0.00E+00	4.50E-02	-9.54E-03	2.02E-03	-4.29E-04	9.09E-05	-1.61E+03
2.00E+00	0.00E+00	1.00E+00																								2.00E+00	1.87E+06	-2.56E+09	3.50E+12	-4.79E+15	6.56E+18		0.00E+00	4.50E-02	-9.54E-03	2.02E-03	-4.29E-04	9.09E-05	2.90E+02
2.03E+00	0.00E+00	1.00E+00																								2.03E+00	1.87E+06	-2.56E+09	3.50E+12	-4.79E+15	6.56E+18		0.00E+00	4.50E-02	-9.54E-03	2.02E-03	-4.29E-04	9.09E-05	2.90E+02
4.47E+00	0.00E+00	1.00E+00																								4.47E+00	1.87E+06	-2.55E+09	3.48E+12	-4.75E+15	6.49E+18		0.00E+00	4.50E-02	-9.54E-03	2.02E-03	-4.29E-04	9.09E-05	2.90E+02
4.28E+01	0.00E+00	1.00E+00																								4.28E+01	1.76E+06	-2.34E+09	3.10E+12	-4.12E+15	5.47E+18		0.00E+00	4.50E-02	-9.54E-03	2.02E-03	-4.29E-04	9.09E-05	2.81E+02
1.24E+02	0.00E+00	1.00E+00																								1.24E+02	1.55E+06	-1.93E+09	2.41E+12	-3.00E+15	3.74E+18		0.00E+00	4.50E-02	-9.54E-03	2.02E-03	-4.29E-04	9.09E-05	2.64E+02
7.17E+00	0.00E+00	1.00E+00																								7.17E+00	1.86E+06	-2.53E+09	3.45E+12	-4.70E+15	6.41E+18		0.00E+00	4.50E-02	-9.54E-03	2.02E-03	-4.29E-04	9.09E-05	2.89E+02
2.51E+01	0.00E+00	1.00E+00																								2.51E+01	1.81E+06	-2.43E+09	3.27E+12	-4.40E+15	5.92E+18		0.00E+00	4.50E-02	-9.54E-03	2.02E-03	-4.29E-04	9.09E-05	2.85E+02
0.00E+00	0.00E+00	1.00E+00																								0.00E+00	1.88E+06	-2.57E+09	3.52E+12	-4.83E+15	6.62E+18		0.00E+00	4.50E-02	-9.54E-03	2.02E-03	-4.29E-04	9.09E-05	2.91E+02
0.00E+00	0.00E+00	1.00E+00																								0.00E+00	1.88E+06	-2.57E+09	3.52E+12	-4.83E+15	6.62E+18		0.00E+00	4.50E-02	-9.54E-03	2.02E-03	-4.29E-04	9.09E-05	2.91E+02
0.00E+00	0.00E+00	1.00E+00																								0.00E+00	1.88E+06	-2.57E+09	3.52E+12	-4.83E+15	6.62E+18		0.00E+00	4.50E-02	-9.54E-03	2.02E-03	-4.29E-04	9.09E-05	2.91E+02
1.79E+04	0.00E+00	1.00E+00																								1.79E+04	2.72E+08	4.48E+12	7.38E+16	1.22E+21	2.01E+25		0.00E+00	4.50E-02	-9.54E-03	2.02E-03	-4.29E-04	9.09E-05	-3.50E+03
2.48E+04	0.00E+00	1.00E+00																								2.48E+04	5.51E+08	1.29E+13	3.03E+17	7.11E+21	1.67E+26		0.00E+00	4.50E-02	-9.54E-03	2.02E-03	-4.29E-04	9.09E-05	-4.98E+03
4.89E+01	0.00E+00	1.00E+00																								4.89E+01	1.75E+06	-2.31E+09	3.05E+12	-4.03E+15	5.32E+18		0.00E+00	4.50E-02	-9.54E-03	2.02E-03	-4.29E-04	9.09E-05	2.80E+02
1.48E+04	0.00E+00	1.00E+00																								1.48E+04	1.79E+08	2.40E+12	3.22E+16	4.31E+20	5.77E+24		0.00E+00	4.50E-02	-9.54E-03	2.02E-03	-4.29E-04	9.09E-05	-2.84E+03
8.88E+02	0.00E+00	1.00E+00																								8.88E+02	2.33E+05	-1.12E+08	5.41E+10	-2.61E+13	1.26E+16		0.00E+00	4.50E-02	-9.54E-03	2.02E-03	-4.29E-04	9.09E-05	1.02E+02
3.39E+02	0.00E+00	1.00E+00																								3.39E+02	1.06E+06	-1.10E+09	1.13E+12	-1.16E+15	1.20E+18		0.00E+00	4.50E-02	-9.54E-03	2.02E-03	-4.29E-04	9.09E-05	2.19E+02
6.00E+01	0.00E+00	1.00E+00																								6.00E+01	1.72E+06	-2.25E+09	2.95E+12	-3.86E+15	5.06E+18		0.00E+00	4.50E-02	-9.54E-03	2.02E-03	-4.29E-04	9.09E-05	2.78E+02
2.92E+02	0.00E+00	1.00E+00																								2.92E+02	1.16E+06	-1.25E+09	1.35E+12	-1.46E+15	1.57E+18		0.00E+00	4.50E-02	-9.54E-03	2.02E-03	-4.29E-04	9.09E-05	2.29E+02
1.40E-01	0.00E+00	1.00E+00																								1.40E-01	1.88E+06	-2.57E+09	3.52E+12	-4.83E+15	6.61E+18		0.00E+00	4.50E-02	-9.54E-03	2.02E-03	-4.29E-04	9.09E-05	2.91E+02
3.35E+01	0.00E+00	1.00E+00																								3.35E+01	1.79E+06	-2.39E+09	3.19E+12	-4.27E+15	5.70E+18		0.00E+00	4.50E-02	-9.54E-03	2.02E-03	-4.29E-04	9.09E-05	2.83E+02
3.71E+02	0.00E+00	1.00E+00																								3.71E+02	9.98E+05	-9.96E+08	9.95E+11	-9.94E+14	9.93E+17		0.00E+00	4.50E-02	-9.54E-03	2.02E-03	-4.29E-04	9.09E-05	2.12E+02
2.56E+01	0.00E+00	1.00E+00																								2.56E+01	1.81E+06	-2.43E+09	3.27E+12	-4.40E+15	5.91E+18		0.00E+00	4.50E-02	-9.54E-03	2.02E-03	-4.29E-04	9.09E-05	2.85E+02
4.11E+01	0.00E+00	1.00E+00																								4.11E+01	1.77E+06	-2.35E+09	3.12E+12	-4.15E+15	5.51E+18		0.00E+00	4.50E-02	-9.54E-03	2.02E-03	-4.29E-04	9.09E-05	2.82E+02
9.33E+02	0.00E+00	1.00E+00																								9.33E+02	1.91E+05	-8.33E+07	3.64E+10	-1.59E+13	6.94E+15		0.00E+00	4.50E-02	-9.54E-03	2.02E-03	-4.29E-04	9.09E-05	9.26E+01
3.26E+03	0.00E+00	1.00E+00																								3.26E+03	3.57E+06	6.76E+09	1.28E+13	2.41E+16	4.57E+19		0.00E+00	4.50E-02	-9.54E-03	2.02E-03	-4.29E-04	9.09E-05	-4.01E+02
1.81E+01	0.00E+00	1.00E+00																								1.81E+01	1.83E+06	-2.47E+09	3.34E+12	-4.52E+15	6.11E+18		0.00E+00	4.50E-02	-9.54E-03	2.02E-03	-4.29E-04	9.09E-05	2.87E+02
2.70E-01	0.00E+00	1.00E+00																								2.70E-01	1.88E+06	-2.57E+09	3.52E+12	-4.82E+15	6.61E+18		0.00E+00	4.50E-02	-9.54E-03	2.02E-03	-4.29E-04	9.09E-05	2.90E+02
3.25E+01	0.00E+00	1.00E+00																								3.25E+01	1.79E+06	-2.39E+09	3.20E+12	-4.28E+15	5.73E+18		0.00E+00	4.50E-02	-9.54E-03	2.02E-03	-4.29E-04	9.09E-05	2.84E+02
3.80E-01	0.00E+00	1.00E+00																								3.80E-01	1.88E+06	-2.57E+09	3.52E+12	-4.82E+15	6.61E+18		0.00E+00	4.50E-02	-9.54E-03	2.02E-03	-4.29E-04	9.09E-05	2.90E+02
5.55E+02	0.00E+00	1.00E+00																								5.55E+02	6.65E+05	-5.43E+08	4.43E+11	-3.61E+14	2.94E+17		0.00E+00	4.50E-02	-9.54E-03	2.02E-03	-4.29E-04	9.09E-05	1.73E+02
0.00E+00	0.00E+00	1.00E+00																								0.00E+00	1.88E+06	-2.57E+09	3.52E+12	-4.83E+15	6.62E+18		0.00E+00	4.50E-02	-9.54E-03	2.02E-03	-4.29E-04	9.09E-05	2.91E+02
5.01E+03	0.00E+00	1.00E+00																								5.01E+03	1.33E+07	4.83E+10	1.76E+14	6.42E+17	2.34E+21		0.00E+00	4.50E-02	-9.54E-03	2.02E-03	-4.29E-04	9.09E-05	-7.72E+02
8.78E+00	0.00E+00	1.00E+00																								8.78E+00	1.85E+06	-2.52E+09	3.44E+12	-4.68E+15	6.37E+18		0.00E+00	4.50E-02	-9.54E-03	2.02E-03	-4.29E-04	9.09E-05	2.89E+02
9.20E-01	0.00E+00	1.00E+00																								9.20E-01	1.87E+06	-2.57E+09	3.52E+12	-4.81E+15	6.59E+18		0.00E+00	4.50E-02	-9.54E-03	2.02E-03	-4.29E-04	9.09E-05	2.90E+02
6.32E+00	0.00E+00	1.00E+00																								6.32E+00	1.86E+06	-2.54E+09	3.46E+12	-4.72E+15	6.44E+18		0.00E+00	4.50E-02	-9.54E-03	2.02E-03	-4.29E-04	9.09E-05	2.89E+02
9.50E-01	0.00E+00	1.00E+00																								9.50E-01	1.87E+06	-2.57E+09	3.51E+12	-4.81E+15	6.59E+18		0.00E+00	4.50E-02	-9.54E-03	2.02E-03	-4.29E-04	9.09E-05	2.90E+02
9.50E-01	0.00E+00	1.00E+00																								9.50E-01	1.87E+06	-2.57E+09	3.51E+12	-4.81E+15	6.59E+18		0.00E+00	4.50E-02	-9.54E-03	2.02E-03	-4.29E-04	9.09E-05	2.90E+02
0.00E+00	0.00E+00	1.00E+00																								0.00E+00	1.88E+06	-2.57E+09	3.52E+12	-4.83E+15	6.62E+18		0.00E+00	4.50E-02	-9.54E-03	2.02E-03	-4.29E-04	9.09E-05	2.91E+02
0.00E+00	0.00E+00	1.00E+00																								0.00E+00	1.88E+06	-2.57E+09	3.52E+12	-4.83E+15	6.62E+18		0.00E+00	4.50E-02	-9.54E-03	2.02E-03	-4.29E-04	9.09E-05	2.91E+02
6.98E+01	0.00E+00	1.00E+00																								6.98E+01	1.69E+06	-2.20E+09	2.86E+12	-3.72E+15	4.84E+18		0.00E+00	4.50E-02	-9.54E-03	2.02E-03	-4.29E-04	9.09E-05	2.76E+02
6.54E+00	0.00E+00	1.00E+00																								6.54E+00	1.86E+06	-2.54E+09	3.46E+12	-4.72E+15	6.43E+18		0.00E+00	4.50E-02	-9.54E-03	2.02E-03	-4.29E-04	9.09E-05	2.89E+02
3.60E+01	0.00E+00	1.00E+00																								3.60E+01	1.78E+06	-2.38E+09	3.17E+12	-4.23E+15	5.64E+18		0.00E+00	4.50E-02	-9.54E-03	2.02E-03	-4.29E-04	9.09E-05	2.83E+02
3.25E+01	0.00E+00	1.00E+00																								3.25E+01	1.79E+06	-2.39E+09	3.20E+12	-4.28E+15	5.73E+18		0.00E+00	4.50E-02	-9.54E-03	2.02E-03	-4.29E-04	9.09E-05	2.84E+02
1.93E+02	0.00E+00	1.00E+00																								1.93E+02	1.38E+06	-1.63E+09	1.92E+12	-2.26E+15	2.66E+18		0.00E+00	4.50E-02	-9.54E-03	2.02E-03	-4.29E-04	9.09E-05	2.50E+02
1.23E+00	0.00E+00	1.00E+00																								1.23E+00	1.87E+06	-2.57E+09	3.51E+12	-4.81E+15	6.58E+18		0.00E+00	4.50E-02	-9.54E-03	2.02E-03	-4.29E-04	9.09E-05	2.90E+02
5.27E+03	0.00E+00	1.00E+00																								5.27E+03	1.52E+07	5.93E+10	2.31E+14	9.02E+17	3.52E+21		0.00E+00	4.50E-02	-9.54E-03	2.02E-03	-4.29E-04	9.09E-05	-8.27E+02
7.20E+01	0.00E+00	1.00E+00																								7.20E+01	1.69E+06	-2.19E+09	2.84E+12	-3.69E+15	4.79E+18		0.00E+00	4.50E-02	-9.54E-03	2.02E-03	-4.29E-04	9.09E-05	2.75E+02
1.39E+02	0.00E+00	1.00E+00																								1.39E+02	1.52E+06	-1.87E+09	2.30E+12	-2.83E+15	3.49E+18		0.00E+00	4.50E-02	-9.54E-03	2.02E-03	-4.29E-04	9.09E-05	2.61E+02
5.77E+02	0.00E+00	1.00E+00																								5.77E+02	6.29E+05	-4.99E+08	3.95E+11	-3.13E+14	2.49E+17		0.00E+00	4.50E-02	-9.54E-03	2.02E-03	-4.29E-04	9.09E-05	1.68E+02
1.39E+03	0.00E+00	1.00E+00																								1.39E+03	5.25E+02	1.20E+04	2.75E+05	6.31E+06	1.44E+08		0.00E+00	4.50E-02	-9.54E-03	2.02E-03	-4.29E-04	9.09E-05	-4.86E+00
4.49E+03	0.00E+00	1.00E+00																								4.49E+03	9.74E+06	3.04E+10	9.48E+13	2.96E+17	9.23E+20		0.00E+00	4.50E-02	-9.54E-03	2.02E-03	-4.29E-04	9.09E-05	-6.62E+02
1.70E+02	0.00E+00	1.00E+00																								1.70E+02	1.44E+06	-1.73E+09	2.08E+12	-2.49E+15	2.99E+18		0.00E+00	4.50E-02	-9.54E-03	2.02E-03	-4.29E-04	9.09E-05	2.55E+02
6.18E+03	0.00E+00	1.00E+00																								6.18E+03	2.32E+07	1.12E+11	5.37E+14	2.59E+18	1.25E+22		0.00E+00	4.50E-02	-9.54E-03	2.02E-03	-4.29E-04	9.09E-05	-1.02E+03
6.50E+03	0.00E+00	1.00E+00																								6.50E+03	2.63E+07	1.35E+11	6.93E+14	3.56E+18	1.83E+22		0.00E+00	4.50E-02	-9.54E-03	2.02E-03	-4.29E-04	9.09E-05	-1.09E+03
0.00E+00	0.00E+00	1.00E+00																								0.00E+00	1.88E+06	-2.57E+09	3.52E+12	-4.83E+15	6.62E+18		0.00E+00	4.50E-02	-9.54E-03	2.02E-03	-4.29E-04	9.09E-05	2.91E+02
9.52E+02	0.00E+00	1.00E+00																								9.52E+02	1.75E+05	-7.29E+07	3.05E+10	-1.27E+13	5.32E+15		0.00E+00	4.50E-02	-9.54E-03	2.02E-03	-4.29E-04	9.09E-05	8.86E+01
0.00E+00	0.00E+00	1.00E+00																								0.00E+00	1.88E+06	-2.57E+09	3.52E+12	-4.83E+15	6.62E+18		0.00E+00	4.50E-02	-9.54E-03	2.02E-03	-4.29E-04	9.09E-05	2.91E+02
4.46E+01	0.00E+00	1.00E+00																								4.46E+01	1.76E+06	-2.33E+09	3.09E+12	-4.09E+15	5.43E+18		0.00E+00	4.50E-02	-9.54E-03	2.02E-03	-4.29E-04	9.09E-05	2.81E+02
0.00E+00	0.00E+00	1.00E+00																								0.00E+00	1.88E+06	-2.57E+09	3.52E+12	-4.83E+15	6.62E+18		0.00E+00	4.50E-02	-9.54E-03	2.02E-03	-4.29E-04	9.09E-05	2.91E+02
4.20E+01	0.00E+00	1.00E+00																								4.20E+01	1.76E+06	-2.34E+09	3.11E+12	-4.13E+15	5.49E+18		0.00E+00	4.50E-02	-9.54E-03	2.02E-03	-4.29E-04	9.09E-05	2.82E+02
0.00E+00	0.00E+00	1.00E+00																								0.00E+00	1.88E+06	-2.57E+09	3.52E+12	-4.83E+15	6.62E+18		0.00E+00	4.50E-02	-9.54E-03	2.02E-03	-4.29E-04	9.09E-05	2.91E+02
1.36E+02	0.00E+00	1.00E+00																								1.36E+02	1.52E+06	-1.88E+09	2.32E+12	-2.86E+15	3.53E+18		0.00E+00	4.50E-02	-9.54E-03	2.02E-03	-4.29E-04	9.09E-05	2.62E+02
9.70E-01	0.00E+00	1.00E+00																								9.70E-01	1.87E+06	-2.57E+09	3.51E+12	-4.81E+15	6.59E+18		0.00E+00	4.50E-02	-9.54E-03	2.02E-03	-4.29E-04	9.09E-05	2.90E+02
1.29E+01	0.00E+00	1.00E+00																								1.29E+01	1.84E+06	-2.50E+09	3.39E+12	-4.61E+15	6.25E+18		0.00E+00	4.50E-02	-9.54E-03	2.02E-03	-4.29E-04	9.09E-05	2.88E+02
4.55E+01	0.00E+00	1.00E+00																								4.55E+01	1.75E+06	-2.32E+09	3.08E+12	-4.08E+15	5.40E+18		0.00E+00	4.50E-02	-9.54E-03	2.02E-03	-4.29E-04	9.09E-05	2.81E+02
6.50E-01	0.00E+00	1.00E+00																								6.50E-01	1.88E+06	-2.57E+09	3.52E+12	-4.82E+15	6.60E+18		0.00E+00	4.50E-02	-9.54E-03	2.02E-03	-4.29E-04	9.09E-05	2.90E+02
0.00E+00	0.00E+00	1.00E+00																								0.00E+00	1.88E+06	-2.57E+09	3.52E+12	-4.83E+15	6.62E+18		0.00E+00	4.50E-02	-9.54E-03	2.02E-03	-4.29E-04	9.09E-05	2.91E+02
0.00E+00	0.00E+00	1.00E+00																								0.00E+00	1.88E+06	-2.57E+09	3.52E+12	-4.83E+15	6.62E+18		0.00E+00	4.50E-02	-9.54E-03	2.02E-03	-4.29E-04	9.09E-05	2.91E+02
2.23E+02	0.00E+00	1.00E+00																								2.23E+02	1.32E+06	-1.51E+09	1.73E+12	-1.99E+15	2.28E+18		0.00E+00	4.50E-02	-9.54E-03	2.02E-03	-4.29E-04	9.09E-05	2.43E+02
5.30E+00	0.00E+00	1.00E+00																								5.30E+00	1.86E+06	-2.54E+09	3.47E+12	-4.74E+15	6.47E+18		0.00E+00	4.50E-02	-9.54E-03	2.02E-03	-4.29E-04	9.09E-05	2.89E+02
2.56E+02	0.00E+00	1.00E+00																								2.56E+02	1.24E+06	-1.38E+09	1.54E+12	-1.72E+15	1.91E+18		0.00E+00	4.50E-02	-9.54E-03	2.02E-03	-4.29E-04	9.09E-05	2.36E+02
2.16E+03	0.00E+00	1.00E+00																								2.16E+03	6.30E+05	5.00E+08	3.96E+11	3.14E+14	2.50E+17		0.00E+00	4.50E-02	-9.54E-03	2.02E-03	-4.29E-04	9.09E-05	-1.68E+02
0.00E+00	0.00E+00	1.00E+00																								0.00E+00	1.88E+06	-2.57E+09	3.52E+12	-4.83E+15	6.62E+18		0.00E+00	4.50E-02	-9.54E-03	2.02E-03	-4.29E-04	9.09E-05	2.91E+02
3.02E+01	0.00E+00	1.00E+00																								3.02E+01	1.80E+06	-2.41E+09	3.22E+12	-4.32E+15	5.79E+18		0.00E+00	4.50E-02	-9.54E-03	2.02E-03	-4.29E-04	9.09E-05	2.84E+02
4.00E-01	0.00E+00	1.00E+00																								4.00E-01	1.88E+06	-2.57E+09	3.52E+12	-4.82E+15	6.61E+18		0.00E+00	4.50E-02	-9.54E-03	2.02E-03	-4.29E-04	9.09E-05	2.90E+02
0.00E+00	0.00E+00	1.00E+00																								0.00E+00	1.88E+06	-2.57E+09	3.52E+12	-4.83E+15	6.62E+18		0.00E+00	4.50E-02	-9.54E-03	2.02E-03	-4.29E-04	9.09E-05	2.91E+02
9.38E+00	0.00E+00	1.00E+00																								9.38E+00	1.85E+06	-2.52E+09	3.43E+12	-4.67E+15	6.35E+18		0.00E+00	4.50E-02	-9.54E-03	2.02E-03	-4.29E-04	9.09E-05	2.89E+02
0.00E+00	0.00E+00	1.00E+00																								0.00E+00	1.88E+06	-2.57E+09	3.52E+12	-4.83E+15	6.62E+18		0.00E+00	4.50E-02	-9.54E-03	2.02E-03	-4.29E-04	9.09E-05	2.91E+02
0.00E+00	0.00E+00	1.00E+00																								0.00E+00	1.88E+06	-2.57E+09	3.52E+12	-4.83E+15	6.62E+18		0.00E+00	4.50E-02	-9.54E-03	2.02E-03	-4.29E-04	9.09E-05	2.91E+02
4.11E+01	0.00E+00	1.00E+00																								4.11E+01	1.77E+06	-2.35E+09	3.12E+12	-4.15E+15	5.51E+18		0.00E+00	4.50E-02	-9.54E-03	2.02E-03	-4.29E-04	9.09E-05	2.82E+02
9.00E-01	0.00E+00	1.00E+00																								9.00E-01	1.87E+06	-2.57E+09	3.52E+12	-4.81E+15	6.59E+18		0.00E+00	4.50E-02	-9.54E-03	2.02E-03	-4.29E-04	9.09E-05	2.90E+02
6.01E+02	0.00E+00	1.00E+00																								6.01E+02	5.92E+05	-4.55E+08	3.50E+11	-2.70E+14	2.07E+17		0.00E+00	4.50E-02	-9.54E-03	2.02E-03	-4.29E-04	9.09E-05	1.63E+02
0.00E+00	0.00E+00	1.00E+00																								0.00E+00	1.88E+06	-2.57E+09	3.52E+12	-4.83E+15	6.62E+18		0.00E+00	4.50E-02	-9.54E-03	2.02E-03	-4.29E-04	9.09E-05	2.91E+02
6.50E-01	0.00E+00	1.00E+00																								6.50E-01	1.88E+06	-2.57E+09	3.52E+12	-4.82E+15	6.60E+18		0.00E+00	4.50E-02	-9.54E-03	2.02E-03	-4.29E-04	9.09E-05	2.90E+02
2.28E+01	0.00E+00	1.00E+00																								2.28E+01	1.82E+06	-2.45E+09	3.30E+12	-4.44E+15	5.98E+18		0.00E+00	4.50E-02	-9.54E-03	2.02E-03	-4.29E-04	9.09E-05	2.86E+02
5.17E+00	0.00E+00	1.00E+00																								5.17E+00	1.86E+06	-2.54E+09	3.47E+12	-4.74E+15	6.47E+18		0.00E+00	4.50E-02	-9.54E-03	2.02E-03	-4.29E-04	9.09E-05	2.89E+02
1.16E+00	0.00E+00	1.00E+00																								1.16E+00	1.87E+06	-2.57E+09	3.51E+12	-4.81E+15	6.58E+18		0.00E+00	4.50E-02	-9.54E-03	2.02E-03	-4.29E-04	9.09E-05	2.90E+02
0.00E+00	0.00E+00	1.00E+00																								0.00E+00	1.88E+06	-2.57E+09	3.52E+12	-4.83E+15	6.62E+18		0.00E+00	4.50E-02	-9.54E-03	2.02E-03	-4.29E-04	9.09E-05	2.91E+02
0.00E+00	0.00E+00	1.00E+00																								0.00E+00	1.88E+06	-2.57E+09	3.52E+12	-4.83E+15	6.62E+18		0.00E+00	4.50E-02	-9.54E-03	2.02E-03	-4.29E-04	9.09E-05	2.91E+02
2.90E+00	0.00E+00	1.00E+00																								2.90E+00	1.87E+06	-2.56E+09	3.49E+12	-4.78E+15	6.53E+18		0.00E+00	4.50E-02	-9.54E-03	2.02E-03	-4.29E-04	9.09E-05	2.90E+02
0.00E+00	0.00E+00	1.00E+00																								0.00E+00	1.88E+06	-2.57E+09	3.52E+12	-4.83E+15	6.62E+18		0.00E+00	4.50E-02	-9.54E-03	2.02E-03	-4.29E-04	9.09E-05	2.91E+02
7.20E-01	0.00E+00	1.00E+00																								7.20E-01	1.88E+06	-2.57E+09	3.52E+12	-4.82E+15	6.60E+18		0.00E+00	4.50E-02	-9.54E-03	2.02E-03	-4.29E-04	9.09E-05	2.90E+02
9.20E-01	0.00E+00	1.00E+00																								9.20E-01	1.87E+06	-2.57E+09	3.52E+12	-4.81E+15	6.59E+18		0.00E+00	4.50E-02	-9.54E-03	2.02E-03	-4.29E-04	9.09E-05	2.90E+02
6.70E-01	0.00E+00	1.00E+00																								6.70E-01	1.88E+06	-2.57E+09	3.52E+12	-4.82E+15	6.60E+18		0.00E+00	4.50E-02	-9.54E-03	2.02E-03	-4.29E-04	9.09E-05	2.90E+02
1.16E+03	0.00E+00	1.00E+00																								1.16E+03	4.27E+04	-8.84E+06	1.83E+09	-3.78E+11	7.81E+13		0.00E+00	4.50E-02	-9.54E-03	2.02E-03	-4.29E-04	9.09E-05	4.38E+01
0.00E+00	0.00E+00	1.00E+00																								0.00E+00	1.88E+06	-2.57E+09	3.52E+12	-4.83E+15	6.62E+18		0.00E+00	4.50E-02	-9.54E-03	2.02E-03	-4.29E-04	9.09E-05	2.91E+02
0.00E+00	0.00E+00	1.00E+00																								0.00E+00	1.88E+06	-2.57E+09	3.52E+12	-4.83E+15	6.62E+18		0.00E+00	4.50E-02	-9.54E-03	2.02E-03	-4.29E-04	9.09E-05	2.91E+02
0.00E+00	0.00E+00	1.00E+00																								0.00E+00	1.88E+06	-2.57E+09	3.52E+12	-4.83E+15	6.62E+18		0.00E+00	4.50E-02	-9.54E-03	2.02E-03	-4.29E-04	9.09E-05	2.91E+02
6.31E+01	0.00E+00	1.00E+00																								6.31E+01	1.71E+06	-2.23E+09	2.92E+12	-3.82E+15	4.99E+18		0.00E+00	4.50E-02	-9.54E-03	2.02E-03	-4.29E-04	9.09E-05	2.77E+02
1.32E+02	0.00E+00	1.00E+00																								1.32E+02	1.53E+06	-1.90E+09	2.35E+12	-2.91E+15	3.60E+18		0.00E+00	4.50E-02	-9.54E-03	2.02E-03	-4.29E-04	9.09E-05	2.63E+02
7.20E-01	0.00E+00	1.00E+00																								7.20E-01	1.88E+06	-2.57E+09	3.52E+12	-4.82E+15	6.60E+18		0.00E+00	4.50E-02	-9.54E-03	2.02E-03	-4.29E-04	9.09E-05	2.90E+02
0.00E+00	0.00E+00	1.00E+00																								0.00E+00	1.88E+06	-2.57E+09	3.52E+12	-4.83E+15	6.62E+18		0.00E+00	4.50E-02	-9.54E-03	2.02E-03	-4.29E-04	9.09E-05	2.91E+02
4.33E+01	0.00E+00	1.00E+00																								4.33E+01	1.76E+06	-2.34E+09	3.10E+12	-4.11E+15	5.46E+18		0.00E+00	4.50E-02	-9.54E-03	2.02E-03	-4.29E-04	9.09E-05	2.81E+02
0.00E+00	0.00E+00	1.00E+00																								0.00E+00	1.88E+06	-2.57E+09	3.52E+12	-4.83E+15	6.62E+18		0.00E+00	4.50E-02	-9.54E-03	2.02E-03	-4.29E-04	9.09E-05	2.91E+02
1.39E+00	0.00E+00	1.00E+00																								1.39E+00	1.87E+06	-2.56E+09	3.51E+12	-4.80E+15	6.58E+18		0.00E+00	4.50E-02	-9.54E-03	2.02E-03	-4.29E-04	9.09E-05	2.90E+02
2.49E+00	0.00E+00	1.00E+00																								2.49E+00	1.87E+06	-2.56E+09	3.50E+12	-4.79E+15	6.55E+18		0.00E+00	4.50E-02	-9.54E-03	2.02E-03	-4.29E-04	9.09E-05	2.90E+02
6.31E+01	0.00E+00	1.00E+00																								6.31E+01	1.71E+06	-2.23E+09	2.92E+12	-3.82E+15	4.99E+18		0.00E+00	4.50E-02	-9.54E-03	2.02E-03	-4.29E-04	9.09E-05	2.77E+02
0.00E+00	0.00E+00	1.00E+00																								0.00E+00	1.88E+06	-2.57E+09	3.52E+12	-4.83E+15	6.62E+18		0.00E+00	4.50E-02	-9.54E-03	2.02E-03	-4.29E-04	9.09E-05	2.91E+02
0.00E+00	0.00E+00	1.00E+00																								0.00E+00	1.88E+06	-2.57E+09	3.52E+12	-4.83E+15	6.62E+18		0.00E+00	4.50E-02	-9.54E-03	2.02E-03	-4.29E-04	9.09E-05	2.91E+02
0.00E+00	0.00E+00	1.00E+00																								0.00E+00	1.88E+06	-2.57E+09	3.52E+12	-4.83E+15	6.62E+18		0.00E+00	4.50E-02	-9.54E-03	2.02E-03	-4.29E-04	9.09E-05	2.91E+02
9.00E-02	0.00E+00	1.00E+00																								9.00E-02	1.88E+06	-2.57E+09	3.52E+12	-4.83E+15	6.61E+18		0.00E+00	4.50E-02	-9.54E-03	2.02E-03	-4.29E-04	9.09E-05	2.91E+02
2.90E+00	0.00E+00	1.00E+00																								2.90E+00	1.87E+06	-2.56E+09	3.49E+12	-4.78E+15	6.53E+18		0.00E+00	4.50E-02	-9.54E-03	2.02E-03	-4.29E-04	9.09E-05	2.90E+02
0.00E+00	0.00E+00	1.00E+00																								0.00E+00	1.88E+06	-2.57E+09	3.52E+12	-4.83E+15	6.62E+18		0.00E+00	4.50E-02	-9.54E-03	2.02E-03	-4.29E-04	9.09E-05	2.91E+02
																										0.00E+00	0.00E+00	-0.00E+00	0.00E+00	-0.00E+00	0.00E+00		0.00E+00	0.00E+00	-0.00E+00	0.00E+00	-0.00E+00	0.00E+00	0.00E+00
																										0.00E+00	0.00E+00	-0.00E+00	0.00E+00	-0.00E+00	0.00E+00		0.00E+00	0.00E+00	-0.00E+00	0.00E+00	-0.00E+00	0.00E+00	0.00E+00
																										0.00E+00	0.00E+00	-0.00E+00	0.00E+00	-0.00E+00	0.00E+00		0.00E+00	0.00E+00	-0.00E+00	0.00E+00	-0.00E+00	0.00E+00	0.00E+00
																										0.00E+00	0.00E+00	-0.00E+00	0.00E+00	-0.00E+00	0.00E+00		0.00E+00	0.00E+00	-0.00E+00	0.00E+00	-0.00E+00	0.00E+00	0.00E+00
																										0.00E+00	0.00E+00	-0.00E+00	0.00E+00	-0.00E+00	0.00E+00		0.00E+00	0.00E+00	-0.00E+00	0.00E+00	-0.00E+00	0.00E+00	0.00E+00
																										0.00E+00	0.00E+00	-0.00E+00	0.00E+00	-0.00E+00	0.00E+00		0.00E+00	0.00E+00	-0.00E+00	0.00E+00	-0.00E+00	0.00E+00	0.00E+00
																										0.00E+00	0.00E+00	-0.00E+00	0.00E+00	-0.00E+00	0.00E+00		0.00E+00	0.00E+00	-0.00E+00	0.00E+00	-0.00E+00	0.00E+00	0.00E+00
																										0.00E+00	0.00E+00	-0.00E+00	0.00E+00	-0.00E+00	0.00E+00		0.00E+00	0.00E+00	-0.00E+00	0.00E+00	-0.00E+00	0.00E+00	0.00E+00
																										0.00E+00	0.00E+00	-0.00E+00	0.00E+00	-0.00E+00	0.00E+00		0.00E+00	0.00E+00	-0.00E+00	0.00E+00	-0.00E+00	0.00E+00	0.00E+00
																										0.00E+00	0.00E+00	-0.00E+00	0.00E+00	-0.00E+00	0.00E+00		0.00E+00	0.00E+00	-0.00E+00	0.00E+00	-0.00E+00	0.00E+00	0.00E+00
																										0.00E+00	0.00E+00	-0.00E+00	0.00E+00	-0.00E+00	0.00E+00		0.00E+00	0.00E+00	-0.00E+00	0.00E+00	-0.00E+00	0.00E+00	0.00E+00
																										0.00E+00	0.00E+00	-0.00E+00	0.00E+00	-0.00E+00	0.00E+00		0.00E+00	0.00E+00	-0.00E+00	0.00E+00	-0.00E+00	0.00E+00	0.00E+00
																										0.00E+00	0.00E+00	-0.00E+00	0.00E+00	-0.00E+00	0.00E+00		0.00E+00	0.00E+00	-0.00E+00	0.00E+00	-0.00E+00	0.00E+00	0.00E+00
																										0.00E+00	0.00E+00	-0.00E+00	0.00E+00	-0.00E+00	0.00E+00		0.00E+00	0.00E+00	-0.00E+00	0.00E+00	-0.00E+00	0.00E+00	0.00E+00
																										0.00E+00	0.00E+00	-0.00E+00	0.00E+00	-0.00E+00	0.00E+00		0.00E+00	0.00E+00	-0.00E+00	0.00E+00	-0.00E+00	0.00E+00	0.00E+00
																										0.00E+00	0.00E+00	-0.00E+00	0.00E+00	-0.00E+00	0.00E+00		0.00E+00	0.00E+00	-0.00E+00	0.00E+00	-0.00E+00	0.00E+00	0.00E+00
																										0.00E+00	0.00E+00	-0.00E+00	0.00E+00	-0.00E+00	0.00E+00		0.00E+00	0.00E+00	-0.00E+00	0.00E+00	-0.00E+00	0.00E+00	0.00E+00
																										0.00E+00	0.00E+00	-0.00E+00	0.00E+00	-0.00E+00	0.00E+00		0.00E+00	0.00E+00	-0.00E+00	0.00E+00	-0.00E+00	0.00E+00	0.00E+00
																										0.00E+00	0.00E+00	-0.00E+00	0.00E+00	-0.00E+00	0.00E+00		0.00E+00	0.00E+00	-0.00E+00	0.00E+00	-0.00E+00	0.00E+00	0.00E+00
																										0.00E+00	0.00E+00	-0.00E+00	0.00E+00	-0.00E+00	0.00E+00		0.00E+00	0.00E+00	-0.00E+00	0.00E+00	-0.00E+00	0.00E+00	0.00E+00
																										0.00E+00	0.00E+00	-0.00E+00	0.00E+00	-0.00E+00	0.00E+00		0.00E+00	0.00E+00	-0.00E+00	0.00E+00	-0.00E+00	0.00E+00	0.00E+00
																										0.00E+00	0.00E+00	-0.00E+00	0.00E+00	-0.00E+00	0.00E+00		0.00E+00	0.00E+00	-0.00E+00	0.00E+00	-0.00E+00	0.00E+00	0.00E+00
																										0.00E+00	0.00E+00	-0.00E+00	0.00E+00	-0.00E+00	0.00E+00		0.00E+00	0.00E+00	-0.00E+00	0.00E+00	-0.00E+00	0.00E+00	0.00E+00
																										0.00E+00	0.00E+00	-0.00E+00	0.00E+00	-0.00E+00	0.00E+00		0.00E+00	0.00E+00	-0.00E+00	0.00E+00	-0.00E+00	0.00E+00	0.00E+00
																										0.00E+00	0.00E+00	-0.00E+00	0.00E+00	-0.00E+00	0.00E+00		0.00E+00	0.00E+00	-0.00E+00	0.00E+00	-0.00E+00	0.00E+00	0.00E+00
																										0.00E+00	0.00E+00	-0.00E+00	0.00E+00	-0.00E+00	0.00E+00		0.00E+00	0.00E+00	-0.00E+00	0.00E+00	-0.00E+00	0.00E+00	0.00E+00
																										0.00E+00	0.00E+00	-0.00E+00	0.00E+00	-0.00E+00	0.00E+00		0.00E+00	0.00E+00	-0.00E+00	0.00E+00	-0.00E+00	0.00E+00	0.00E+00
																										0.00E+00	0.00E+00	-0.00E+00	0.00E+00	-0.00E+00	0.00E+00		0.00E+00	0.00E+00	-0.00E+00	0.00E+00	-0.00E+00	0.00E+00	0.00E+00
																										0.00E+00	0.00E+00	-0.00E+00	0.00E+00	-0.00E+00	0.00E+00		0.00E+00	0.00E+00	-0.00E+00	0.00E+00	-0.00E+00	0.00E+00	0.00E+00
																										0.00E+00	0.00E+00	-0.00E+00	0.00E+00	-0.00E+00	0.00E+00		0.00E+00	0.00E+00	-0.00E+00	0.00E+00	-0.00E+00	0.00E+00	0.00E+00
																										0.00E+00	0.00E+00	-0.00E+00	0.00E+00	-0.00E+00	0.00E+00		0.00E+00	0.00E+00	-0.00E+00	0.00E+00	-0.00E+00	0.00E+00	0.00E+00
																										0.00E+00	0.00E+00	-0.00E+00	0.00E+00	-0.00E+00	0.00E+00		0.00E+00	0.00E+00	-0.00E+00	0.00E+00	-0.00E+00	0.00E+00	0.00E+00
																										0.00E+00	0.00E+00	-0.00E+00	0.00E+00	-0.00E+00	0.00E+00		0.00E+00	0.00E+00	-0.00E+00	0.00E+00	-0.00E+00	0.00E+00	0.00E+00
																										0.00E+00	0.00E+00	-0.00E+00	0.00E+00	-0.00E+00	0.00E+00		0.00E+00	0.00E+00	-0.00E+00	0.00E+00	-0.00E+00	0.00E+00	0.00E+00
																										0.00E+00	0.00E+00	-0.00E+00	0.00E+00	-0.00E+00	0.00E+00		0.00E+00	0.00E+00	-0.00E+00	0.00E+00	-0.00E+00	0.00E+00	0.00E+00
																										0.00E+00	0.00E+00	-0.00E+00	0.00E+00	-0.00E+00	0.00E+00		0.00E+00	0.00E+00	-0.00E+00	0.00E+00	-0.00E+00	0.00E+00	0.00E+00
																										0.00E+00	0.00E+00	-0.00E+00	0.00E+00	-0.00E+00	0.00E+00		0.00E+00	0.00E+00	-0.00E+00	0.00E+00	-0.00E+00	0.00E+00	0.00E+00
																										0.00E+00	0.00E+00	-0.00E+00	0.00E+00	-0.00E+00	0.00E+00		0.00E+00	0.00E+00	-0.00E+00	0.00E+00	-0.00E+00	0.00E+00	0.00E+00
																										0.00E+00	0.00E+00	-0.00E+00	0.00E+00	-0.00E+00	0.00E+00		0.00E+00	0.00E+00	-0.00E+00	0.00E+00	-0.00E+00	0.00E+00	0.00E+00
																										0.00E+00	0.00E+00	-0.00E+00	0.00E+00	-0.00E+00	0.00E+00		0.00E+00	0.00E+00	-0.00E+00	0.00E+00	-0.00E+00	0.00E+00	0.00E+00
																										0.00E+00	0.00E+00	-0.00E+00	0.00E+00	-0.00E+00	0.00E+00		0.00E+00	0.00E+00	-0.00E+00	0.00E+00	-0.00E+00	0.00E+00	0.00E+00
																										0.00E+00	0.00E+00	-0.00E+00	0.00E+00	-0.00E+00	0.00E+00		0.00E+00	0.00E+00	-0.00E+00	0.00E+00	-0.00E+00	0.00E+00	0.00E+00
																										0.00E+00	0.00E+00	-0.00E+00	0.00E+00	-0.00E+00	0.00E+00		0.00E+00	0.00E+00	-0.00E+00	0.00E+00	-0.00E+00	0.00E+00	0.00E+00
																										0.00E+00	0.00E+00	-0.00E+00	0.00E+00	-0.00E+00	0.00E+00		0.00E+00	0.00E+00	-0.00E+00	0.00E+00	-0.00E+00	0.00E+00	0.00E+00
																										0.00E+00	0.00E+00	-0.00E+00	0.00E+00	-0.00E+00	0.00E+00		0.00E+00	0.00E+00	-0.00E+00	0.00E+00	-0.00E+00	0.00E+00	0.00E+00
																										0.00E+00	0.00E+00	-0.00E+00	0.00E+00	-0.00E+00	0.00E+00		0.00E+00	0.00E+00	-0.00E+00	0.00E+00	-0.00E+00	0.00E+00	0.00E+00
																										0.00E+00	0.00E+00	-0.00E+00	0.00E+00	-0.00E+00	0.00E+00		0.00E+00	0.00E+00	-0.00E+00	0.00E+00	-0.00E+00	0.00E+00	0.00E+00
																										0.00E+00	0.00E+00	-0.00E+00	0.00E+00	-0.00E+00	0.00E+00		0.00E+00	0.00E+00	-0.00E+00	0.00E+00	-0.00E+00	0.00E+00	0.00E+00
																										0.00E+00	0.00E+00	-0.00E+00	0.00E+00	-0.00E+00	0.00E+00		0.00E+00	0.00E+00	-0.00E+00	0.00E+00	-0.00E+00	0.00E+00	0.00E+00
																										0.00E+00	0.00E+00	-0.00E+00	0.00E+00	-0.00E+00	0.00E+00		0.00E+00	0.00E+00	-0.00E+00	0.00E+00	-0.00E+00	0.00E+00	0.00E+00
																										0.00E+00	0.00E+00	-0.00E+00	0.00E+00	-0.00E+00	0.00E+00		0.00E+00	0.00E+00	-0.00E+00	0.00E+00	-0.00E+00	0.00E+00	0.00E+00
																										0.00E+00	0.00E+00	-0.00E+00	0.00E+00	-0.00E+00	0.00E+00		0.00E+00	0.00E+00	-0.00E+00	0.00E+00	-0.00E+00	0.00E+00	0.00E+00
																										0.00E+00	0.00E+00	-0.00E+00	0.00E+00	-0.00E+00	0.00E+00		0.00E+00	0.00E+00	-0.00E+00	0.00E+00	-0.00E+00	0.00E+00	0.00E+00
																										0.00E+00	0.00E+00	-0.00E+00	0.00E+00	-0.00E+00	0.00E+00		0.00E+00	0.00E+00	-0.00E+00	0.00E+00	-0.00E+00	0.00E+00	0.00E+00
																										0.00E+00	0.00E+00	-0.00E+00	0.00E+00	-0.00E+00	0.00E+00		0.00E+00	0.00E+00	-0.00E+00	0.00E+00	-0.00E+00	0.00E+00	0.00E+00
																										0.00E+00	0.00E+00	-0.00E+00	0.00E+00	-0.00E+00	0.00E+00		0.00E+00	0.00E+00	-0.00E+00	0.00E+00	-0.00E+00	0.00E+00	0.00E+00
																										0.00E+00	0.00E+00	-0.00E+00	0.00E+00	-0.00E+00	0.00E+00		0.00E+00	0.00E+00	-0.00E+00	0.00E+00	-0.00E+00	0.00E+00	0.00E+00
																										0.00E+00	0.00E+00	-0.00E+00	0.00E+00	-0.00E+00	0.00E+00		0.00E+00	0.00E+00	-0.00E+00	0.00E+00	-0.00E+00	0.00E+00	0.00E+00
																										0.00E+00	0.00E+00	-0.00E+00	0.00E+00	-0.00E+00	0.00E+00		0.00E+00	0.00E+00	-0.00E+00	0.00E+00	-0.00E+00	0.00E+00	0.00E+00
																										0.00E+00	0.00E+00	-0.00E+00	0.00E+00	-0.00E+00	0.00E+00		0.00E+00	0.00E+00	-0.00E+00	0.00E+00	-0.00E+00	0.00E+00	0.00E+00
																										0.00E+00	0.00E+00	-0.00E+00	0.00E+00	-0.00E+00	0.00E+00		0.00E+00	0.00E+00	-0.00E+00	0.00E+00	-0.00E+00	0.00E+00	0.00E+00
																										0.00E+00	0.00E+00	-0.00E+00	0.00E+00	-0.00E+00	0.00E+00		0.00E+00	0.00E+00	-0.00E+00	0.00E+00	-0.00E+00	0.00E+00	0.00E+00
																										0.00E+00	0.00E+00	-0.00E+00	0.00E+00	-0.00E+00	0.00E+00		0.00E+00	0.00E+00	-0.00E+00	0.00E+00	-0.00E+00	0.00E+00	0.00E+00
																										0.00E+00	0.00E+00	-0.00E+00	0.00E+00	-0.00E+00	0.00E+00		0.00E+00	0.00E+00	-0.00E+00	0.00E+00	-0.00E+00	0.00E+00	0.00E+00
																										0.00E+00	0.00E+00	-0.00E+00	0.00E+00	-0.00E+00	0.00E+00		0.00E+00	0.00E+00	-0.00E+00	0.00E+00	-0.00E+00	0.00E+00	0.00E+00
																										0.00E+00	0.00E+00	-0.00E+00	0.00E+00	-0.00E+00	0.00E+00		0.00E+00	0.00E+00	-0.00E+00	0.00E+00	-0.00E+00	0.00E+00	0.00E+00
																										0.00E+00	0.00E+00	-0.00E+00	0.00E+00	-0.00E+00	0.00E+00		0.00E+00	0.00E+00	-0.00E+00	0.00E+00	-0.00E+00	0.00E+00	0.00E+00
																										0.00E+00	0.00E+00	-0.00E+00	0.00E+00	-0.00E+00	0.00E+00		0.00E+00	0.00E+00	-0.00E+00	0.00E+00	-0.00E+00	0.00E+00	0.00E+00
																										0.00E+00	0.00E+00	-0.00E+00	0.00E+00	-0.00E+00	0.00E+00		0.00E+00	0.00E+00	-0.00E+00	0.00E+00	-0.00E+00	0.00E+00	0.00E+00
																										0.00E+00	0.00E+00	-0.00E+00	0.00E+00	-0.00E+00	0.00E+00		0.00E+00	0.00E+00	-0.00E+00	0.00E+00	-0.00E+00	0.00E+00	0.00E+00
																										0.00E+00	0.00E+00	-0.00E+00	0.00E+00	-0.00E+00	0.00E+00		0.00E+00	0.00E+00	-0.00E+00	0.00E+00	-0.00E+00	0.00E+00	0.00E+00
																										0.00E+00	0.00E+00	-0.00E+00	0.00E+00	-0.00E+00	0.00E+00		0.00E+00	0.00E+00	-0.00E+00	0.00E+00	-0.00E+00	0.00E+00	0.00E+00
																										0.00E+00	0.00E+00	-0.00E+00	0.00E+00	-0.00E+00	0.00E+00		0.00E+00	0.00E+00	-0.00E+00	0.00E+00	-0.00E+00	0.00E+00	0.00E+00
																										0.00E+00	0.00E+00	-0.00E+00	0.00E+00	-0.00E+00	0.00E+00		0.00E+00	0.00E+00	-0.00E+00	0.00E+00	-0.00E+00	0.00E+00	0.00E+00
																										0.00E+00	0.00E+00	-0.00E+00	0.00E+00	-0.00E+00	0.00E+00		0.00E+00	0.00E+00	-0.00E+00	0.00E+00	-0.00E+00	0.00E+00	0.00E+00
																										0.00E+00	0.00E+00	-0.00E+00	0.00E+00	-0.00E+00	0.00E+00		0.00E+00	0.00E+00	-0.00E+00	0.00E+00	-0.00E+00	0.00E+00	0.00E+00
																										0.00E+00	0.00E+00	-0.00E+00	0.00E+00	-0.00E+00	0.00E+00		0.00E+00	0.00E+00	-0.00E+00	0.00E+00	-0.00E+00	0.00E+00	0.00E+00
																										0.00E+00	0.00E+00	-0.00E+00	0.00E+00	-0.00E+00	0.00E+00		0.00E+00	0.00E+00	-0.00E+00	0.00E+00	-0.00E+00	0.00E+00	0.00E+00
																										0.00E+00	0.00E+00	-0.00E+00	0.00E+00	-0.00E+00	0.00E+00		0.00E+00	0.00E+00	-0.00E+00	0.00E+00	-0.00E+00	0.00E+00	0.00E+00
																										0.00E+00	0.00E+00	-0.00E+00	0.00E+00	-0.00E+00	0.00E+00		0.00E+00	0.00E+00	-0.00E+00	0.00E+00	-0.00E+00	0.00E+00	0.00E+00
																										0.00E+00	0.00E+00	-0.00E+00	0.00E+00	-0.00E+00	0.00E+00		0.00E+00	0.00E+00	-0.00E+00	0.00E+00	-0.00E+00	0.00E+00	0.00E+00
																										0.00E+00	0.00E+00	-0.00E+00	0.00E+00	-0.00E+00	0.00E+00		0.00E+00	0.00E+00	-0.00E+00	0.00E+00	-0.00E+00	0.00E+00	0.00E+00
																										0.00E+00	0.00E+00	-0.00E+00	0.00E+00	-0.00E+00	0.00E+00		0.00E+00	0.00E+00	-0.00E+00	0.00E+00	-0.00E+00	0.00E+00	0.00E+00
																										0.00E+00	0.00E+00	-0.00E+00	0.00E+00	-0.00E+00	0.00E+00		0.00E+00	0.00E+00	-0.00E+00	0.00E+00	-0.00E+00	0.00E+00	0.00E+00
																										0.00E+00	0.00E+00	-0.00E+00	0.00E+00	-0.00E+00	0.00E+00		0.00E+00	0.00E+00	-0.00E+00	0.00E+00	-0.00E+00	0.00E+00	0.00E+00
																										0.00E+00	0.00E+00	-0.00E+00	0.00E+00	-0.00E+00	0.00E+00		0.00E+00	0.00E+00	-0.00E+00	0.00E+00	-0.00E+00	0.00E+00	0.00E+00
																										0.00E+00	0.00E+00	-0.00E+00	0.00E+00	-0.00E+00	0.00E+00		0.00E+00	0.00E+00	-0.00E+00	0.00E+00	-0.00E+00	0.00E+00	0.00E+00
																										0.00E+00	0.00E+00	-0.00E+00	0.00E+00	-0.00E+00	0.00E+00		0.00E+00	0.00E+00	-0.00E+00	0.00E+00	-0.00E+00	0.00E+00	0.00E+00
																										0.00E+00	0.00E+00	-0.00E+00	0.00E+00	-0.00E+00	0.00E+00		0.00E+00	0.00E+00	-0.00E+00	0.00E+00	-0.00E+00	0.00E+00	0.00E+00
																										0.00E+00	0.00E+00	-0.00E+00	0.00E+00	-0.00E+00	0.00E+00		0.00E+00	0.00E+00	-0.00E+00	0.00E+00	-0.00E+00	0.00E+00	0.00E+00
																										0.00E+00	0.00E+00	-0.00E+00	0.00E+00	-0.00E+00	0.00E+00		0.00E+00	0.00E+00	-0.00E+00	0.00E+00	-0.00E+00	0.00E+00	0.00E+00
																										0.00E+00	0.00E+00	-0.00E+00	0.00E+00	-0.00E+00	0.00E+00		0.00E+00	0.00E+00	-0.00E+00	0.00E+00	-0.00E+00	0.00E+00	0.00E+00
																										0.00E+00	0.00E+00	-0.00E+00	0.00E+00	-0.00E+00	0.00E+00		0.00E+00	0.00E+00	-0.00E+00	0.00E+00	-0.00E+00	0.00E+00	0.00E+00
																										0.00E+00	0.00E+00	-0.00E+00	0.00E+00	-0.00E+00	0.00E+00		0.00E+00	0.00E+00	-0.00E+00	0.00E+00	-0.00E+00	0.00E+00	0.00E+00
																										0.00E+00	0.00E+00	-0.00E+00	0.00E+00	-0.00E+00	0.00E+00		0.00E+00	0.00E+00	-0.00E+00	0.00E+00	-0.00E+00	0.00E+00	0.00E+00
																										0.00E+00	0.00E+00	-0.00E+00	0.00E+00	-0.00E+00	0.00E+00		0.00E+00	0.00E+00	-0.00E+00	0.00E+00	-0.00E+00	0.00E+00	0.00E+00
																										0.00E+00	0.00E+00	-0.00E+00	0.00E+00	-0.00E+00	0.00E+00		0.00E+00	0.00E+00	-0.00E+00	0.00E+00	-0.00E+00	0.00E+00	0.00E+00
																										0.00E+00	0.00E+00	-0.00E+00	0.00E+00	-0.00E+00	0.00E+00		0.00E+00	0.00E+00	-0.00E+00	0.00E+00	-0.00E+00	0.00E+00	0.00E+00
																										0.00E+00	0.00E+00	-0.00E+00	0.00E+00	-0.00E+00	0.00E+00		0.00E+00	0.00E+00	-0.00E+00	0.00E+00	-0.00E+00	0.00E+00	0.00E+00
																										0.00E+00	0.00E+00	-0.00E+00	0.00E+00	-0.00E+00	0.00E+00		0.00E+00	0.00E+00	-0.00E+00	0.00E+00	-0.00E+00	0.00E+00	0.00E+00
																										0.00E+00	0.00E+00	-0.00E+00	0.00E+00	-0.00E+00	0.00E+00		0.00E+00	0.00E+00	-0.00E+00	0.00E+00	-0.00E+00	0.00E+00	0.00E+00
																										0.00E+00	0.00E+00	-0.00E+00	0.00E+00	-0.00E+00	0.00E+00		0.00E+00	0.00E+00	-0.00E+00	0.00E+00	-0.00E+00	0.00E+00	0.00E+00
																										0.00E+00	0.00E+00	-0.00E+00	0.00E+00	-0.00E+00	0.00E+00		0.00E+00	0.00E+00	-0.00E+00	0.00E+00	-0.00E+00	0.00E+00	0.00E+00
																										0.00E+00	0.00E+00	-0.00E+00	0.00E+00	-0.00E+00	0.00E+00		0.00E+00	0.00E+00	-0.00E+00	0.00E+00	-0.00E+00	0.00E+00	0.00E+00
																										0.00E+00	0.00E+00	-0.00E+00	0.00E+00	-0.00E+00	0.00E+00		0.00E+00	0.00E+00	-0.00E+00	0.00E+00	-0.00E+00	0.00E+00	0.00E+00
																										0.00E+00	0.00E+00	-0.00E+00	0.00E+00	-0.00E+00	0.00E+00		0.00E+00	0.00E+00	-0.00E+00	0.00E+00	-0.00E+00	0.00E+00	0.00E+00
																										0.00E+00	0.00E+00	-0.00E+00	0.00E+00	-0.00E+00	0.00E+00		0.00E+00	0.00E+00	-0.00E+00	0.00E+00	-0.00E+00	0.00E+00	0.00E+00
																										0.00E+00	0.00E+00	-0.00E+00	0.00E+00	-0.00E+00	0.00E+00		0.00E+00	0.00E+00	-0.00E+00	0.00E+00	-0.00E+00	0.00E+00	0.00E+00
																										0.00E+00	0.00E+00	-0.00E+00	0.00E+00	-0.00E+00	0.00E+00		0.00E+00	0.00E+00	-0.00E+00	0.00E+00	-0.00E+00	0.00E+00	0.00E+00
																										0.00E+00	0.00E+00	-0.00E+00	0.00E+00	-0.00E+00	0.00E+00		0.00E+00	0.00E+00	-0.00E+00	0.00E+00	-0.00E+00	0.00E+00	0.00E+00
																										0.00E+00	0.00E+00	-0.00E+00	0.00E+00	-0.00E+00	0.00E+00		0.00E+00	0.00E+00	-0.00E+00	0.00E+00	-0.00E+00	0.00E+00	0.00E+00
																										0.00E+00	0.00E+00	-0.00E+00	0.00E+00	-0.00E+00	0.00E+00		0.00E+00	0.00E+00	-0.00E+00	0.00E+00	-0.00E+00	0.00E+00	0.00E+00
																										0.00E+00	0.00E+00	-0.00E+00	0.00E+00	-0.00E+00	0.00E+00		0.00E+00	0.00E+00	-0.00E+00	0.00E+00	-0.00E+00	0.00E+00	0.00E+00
																										0.00E+00	0.00E+00	-0.00E+00	0.00E+00	-0.00E+00	0.00E+00		0.00E+00	0.00E+00	-0.00E+00	0.00E+00	-0.00E+00	0.00E+00	0.00E+00
																										0.00E+00	0.00E+00	-0.00E+00	0.00E+00	-0.00E+00	0.00E+00		0.00E+00	0.00E+00	-0.00E+00	0.00E+00	-0.00E+00	0.00E+00	0.00E+00
																										0.00E+00	0.00E+00	-0.00E+00	0.00E+00	-0.00E+00	0.00E+00		0.00E+00	0.00E+00	-0.00E+00	0.00E+00	-0.00E+00	0.00E+00	0.00E+00
																										0.00E+00	0.00E+00	-0.00E+00	0.00E+00	-0.00E+00	0.00E+00		0.00E+00	0.00E+00	-0.00E+00	0.00E+00	-0.00E+00	0.00E+00	0.00E+00
																										0.00E+00	0.00E+00	-0.00E+00	0.00E+00	-0.00E+00	0.00E+00		0.00E+00	0.00E+00	-0.00E+00	0.00E+00	-0.00E+00	0.00E+00	0.00E+00
																										0.00E+00	0.00E+00	-0.00E+00	0.00E+00	-0.00E+00	0.00E+00		0.00E+00	0.00E+00	-0.00E+00	0.00E+00	-0.00E+00	0.00E+00	0.00E+00
																										0.00E+00	0.00E+00	-0.00E+00	0.00E+00	-0.00E+00	0.00E+00		0.00E+00	0.00E+00	-0.00E+00	0.00E+00	-0.00E+00	0.00E+00	0.00E+00
																										0.00E+00	0.00E+00	-0.00E+00	0.00E+00	-0.00E+00	0.00E+00		0.00E+00	0.00E+00	-0.00E+00	0.00E+00	-0.00E+00	0.00E+00	0.00E+00
																										0.00E+00	0.00E+00	-0.00E+00	0.00E+00	-0.00E+00	0.00E+00		0.00E+00	0.00E+00	-0.00E+00	0.00E+00	-0.00E+00	0.00E+00	0.00E+00
																										0.00E+00	0.00E+00	-0.00E+00	0.00E+00	-0.00E+00	0.00E+00		0.00E+00	0.00E+00	-0.00E+00	0.00E+00	-0.00E+00	0.00E+00	0.00E+00
																										0.00E+00	0.00E+00	-0.00E+00	0.00E+00	-0.00E+00	0.00E+00		0.00E+00	0.00E+00	-0.00E+00	0.00E+00	-0.00E+00	0.00E+00	0.00E+00
																										0.00E+00	0.00E+00	-0.00E+00	0.00E+00	-0.00E+00	0.00E+00		0.00E+00	0.00E+00	-0.00E+00	0.00E+00	-0.00E+00	0.00E+00	0.00E+00
																										0.00E+00	0.00E+00	-0.00E+00	0.00E+00	-0.00E+00	0.00E+00		0.00E+00	0.00E+00	-0.00E+00	0.00E+00	-0.00E+00	0.00E+00	0.00E+00
																										0.00E+00	0.00E+00	-0.00E+00	0.00E+00	-0.00E+00	0.00E+00		0.00E+00	0.00E+00	-0.00E+00	0.00E+00	-0.00E+00	0.00E+00	0.00E+00
																										0.00E+00	0.00E+00	-0.00E+00	0.00E+00	-0.00E+00	0.00E+00		0.00E+00	0.00E+00	-0.00E+00	0.00E+00	-0.00E+00	0.00E+00	0.00E+00
																										0.00E+00	0.00E+00	-0.00E+00	0.00E+00	-0.00E+00	0.00E+00		0.00E+00	0.00E+00	-0.00E+00	0.00E+00	-0.00E+00	0.00E+00	0.00E+00
																										0.00E+00	0.00E+00	-0.00E+00	0.00E+00	-0.00E+00	0.00E+00		0.00E+00	0.00E+00	-0.00E+00	0.00E+00	-0.00E+00	0.00E+00	0.00E+00
																										0.00E+00	0.00E+00	-0.00E+00	0.00E+00	-0.00E+00	0.00E+00		0.00E+00	0.00E+00	-0.00E+00	0.00E+00	-0.00E+00	0.00E+00	0.00E+00
																										0.00E+00	0.00E+00	-0.00E+00	0.00E+00	-0.00E+00	0.00E+00		0.00E+00	0.00E+00	-0.00E+00	0.00E+00	-0.00E+00	0.00E+00	0.00E+00
																										0.00E+00	0.00E+00	-0.00E+00	0.00E+00	-0.00E+00	0.00E+00		0.00E+00	0.00E+00	-0.00E+00	0.00E+00	-0.00E+00	0.00E+00	0.00E+00
																										0.00E+00	0.00E+00	-0.00E+00	0.00E+00	-0.00E+00	0.00E+00		0.00E+00	0.00E+00	-0.00E+00	0.00E+00	-0.00E+00	0.00E+00	0.00E+00
																										0.00E+00	0.00E+00	-0.00E+00	0.00E+00	-0.00E+00	0.00E+00		0.00E+00	0.00E+00	-0.00E+00	0.00E+00	-0.00E+00	0.00E+00	0.00E+00
																										0.00E+00	0.00E+00	-0.00E+00	0.00E+00	-0.00E+00	0.00E+00		0.00E+00	0.00E+00	-0.00E+00	0.00E+00	-0.00E+00	0.00E+00	0.00E+00
																										0.00E+00	0.00E+00	-0.00E+00	0.00E+00	-0.00E+00	0.00E+00		0.00E+00	0.00E+00	-0.00E+00	0.00E+00	-0.00E+00	0.00E+00	0.00E+00
																										0.00E+00	0.00E+00	-0.00E+00	0.00E+00	-0.00E+00	0.00E+00		0.00E+00	0.00E+00	-0.00E+00	0.00E+00	-0.00E+00	0.00E+00	0.00E+00
																										0.00E+00	0.00E+00	-0.00E+00	0.00E+00	-0.00E+00	0.00E+00		0.00E+00	0.00E+00	-0.00E+00	0.00E+00	-0.00E+00	0.00E+00	0.00E+00
																										0.00E+00	0.00E+00	-0.00E+00	0.00E+00	-0.00E+00	0.00E+00		0.00E+00	0.00E+00	-0.00E+00	0.00E+00	-0.00E+00	0.00E+00	0.00E+00
																										0.00E+00	0.00E+00	-0.00E+00	0.00E+00	-0.00E+00	0.00E+00		0.00E+00	0.00E+00	-0.00E+00	0.00E+00	-0.00E+00	0.00E+00	0.00E+00
																										0.00E+00	0.00E+00	-0.00E+00	0.00E+00	-0.00E+00	0.00E+00		0.00E+00	0.00E+00	-0.00E+00	0.00E+00	-0.00E+00	0.00E+00	0.00E+00
																										0.00E+00	0.00E+00	-0.00E+00	0.00E+00	-0.00E+00	0.00E+00		0.00E+00	0.00E+00	-0.00E+00	0.00E+00	-0.00E+00	0.00E+00	0.00E+00
																										0.00E+00	0.00E+00	-0.00E+00	0.00E+00	-0.00E+00	0.00E+00		0.00E+00	0.00E+00	-0.00E+00	0.00E+00	-0.00E+00	0.00E+00	0.00E+00
																										0.00E+00	0.00E+00	-0.00E+00	0.00E+00	-0.00E+00	0.00E+00		0.00E+00	0.00E+00	-0.00E+00	0.00E+00	-0.00E+00	0.00E+00	0.00E+00
																										0.00E+00	0.00E+00	-0.00E+00	0.00E+00	-0.00E+00	0.00E+00		0.00E+00	0.00E+00	-0.00E+00	0.00E+00	-0.00E+00	0.00E+00	0.00E+00
																										0.00E+00	0.00E+00	-0.00E+00	0.00E+00	-0.00E+00	0.00E+00		0.00E+00	0.00E+00	-0.00E+00	0.00E+00	-0.00E+00	0.00E+00	0.00E+00
																										0.00E+00	0.00E+00	-0.00E+00	0.00E+00	-0.00E+00	0.00E+00		0.00E+00	0.00E+00	-0.00E+00	0.00E+00	-0.00E+00	0.00E+00	0.00E+00
																										0.00E+00	0.00E+00	-0.00E+00	0.00E+00	-0.00E+00	0.00E+00		0.00E+00	0.00E+00	-0.00E+00	0.00E+00	-0.00E+00	0.00E+00	0.00E+00
																										0.00E+00	0.00E+00	-0.00E+00	0.00E+00	-0.00E+00	0.00E+00		0.00E+00	0.00E+00	-0.00E+00	0.00E+00	-0.00E+00	0.00E+00	0.00E+00
																										0.00E+00	0.00E+00	-0.00E+00	0.00E+00	-0.00E+00	0.00E+00		0.00E+00	0.00E+00	-0.00E+00	0.00E+00	-0.00E+00	0.00E+00	0.00E+00
																										0.00E+00	0.00E+00	-0.00E+00	0.00E+00	-0.00E+00	0.00E+00		0.00E+00	0.00E+00	-0.00E+00	0.00E+00	-0.00E+00	0.00E+00	0.00E+00
																										0.00E+00	0.00E+00	-0.00E+00	0.00E+00	-0.00E+00	0.00E+00		0.00E+00	0.00E+00	-0.00E+00	0.00E+00	-0.00E+00	0.00E+00	0.00E+00
																										0.00E+00	0.00E+00	-0.00E+00	0.00E+00	-0.00E+00	0.00E+00		0.00E+00	0.00E+00	-0.00E+00	0.00E+00	-0.00E+00	0.00E+00	0.00E+00
																										0.00E+00	0.00E+00	-0.00E+00	0.00E+00	-0.00E+00	0.00E+00		0.00E+00	0.00E+00	-0.00E+00	0.00E+00	-0.00E+00	0.00E+00	0.00E+00
																										0.00E+00	0.00E+00	-0.00E+00	0.00E+00	-0.00E+00	0.00E+00		0.00E+00	0.00E+00	-0.00E+00	0.00E+00	-0.00E+00	0.00E+00	0.00E+00
																										0.00E+00	0.00E+00	-0.00E+00	0.00E+00	-0.00E+00	0.00E+00		0.00E+00	0.00E+00	-0.00E+00	0.00E+00	-0.00E+00	0.00E+00	0.00E+00
																										0.00E+00	0.00E+00	-0.00E+00	0.00E+00	-0.00E+00	0.00E+00		0.00E+00	0.00E+00	-0.00E+00	0.00E+00	-0.00E+00	0.00E+00	0.00E+00
																										0.00E+00	0.00E+00	-0.00E+00	0.00E+00	-0.00E+00	0.00E+00		0.00E+00	0.00E+00	-0.00E+00	0.00E+00	-0.00E+00	0.00E+00	0.00E+00
																										0.00E+00	0.00E+00	-0.00E+00	0.00E+00	-0.00E+00	0.00E+00		0.00E+00	0.00E+00	-0.00E+00	0.00E+00	-0.00E+00	0.00E+00	0.00E+00
																										0.00E+00	0.00E+00	-0.00E+00	0.00E+00	-0.00E+00	0.00E+00		0.00E+00	0.00E+00	-0.00E+00	0.00E+00	-0.00E+00	0.00E+00	0.00E+00
																										0.00E+00	0.00E+00	-0.00E+00	0.00E+00	-0.00E+00	0.00E+00		0.00E+00	0.00E+00	-0.00E+00	0.00E+00	-0.00E+00	0.00E+00	0.00E+00
																										0.00E+00	0.00E+00	-0.00E+00	0.00E+00	-0.00E+00	0.00E+00		0.00E+00	0.00E+00	-0.00E+00	0.00E+00	-0.00E+00	0.00E+00	0.00E+00
																										0.00E+00	0.00E+00	-0.00E+00	0.00E+00	-0.00E+00	0.00E+00		0.00E+00	0.00E+00	-0.00E+00	0.00E+00	-0.00E+00	0.00E+00	0.00E+00
																										0.00E+00	0.00E+00	-0.00E+00	0.00E+00	-0.00E+00	0.00E+00		0.00E+00	0.00E+00	-0.00E+00	0.00E+00	-0.00E+00	0.00E+00	0.00E+00
																										0.00E+00	0.00E+00	-0.00E+00	0.00E+00	-0.00E+00	0.00E+00		0.00E+00	0.00E+00	-0.00E+00	0.00E+00	-0.00E+00	0.00E+00	0.00E+00
																										0.00E+00	0.00E+00	-0.00E+00	0.00E+00	-0.00E+00	0.00E+00		0.00E+00	0.00E+00	-0.00E+00	0.00E+00	-0.00E+00	0.00E+00	0.00E+00
																										0.00E+00	0.00E+00	-0.00E+00	0.00E+00	-0.00E+00	0.00E+00		0.00E+00	0.00E+00	-0.00E+00	0.00E+00	-0.00E+00	0.00E+00	0.00E+00
																										0.00E+00	0.00E+00	-0.00E+00	0.00E+00	-0.00E+00	0.00E+00		0.00E+00	0.00E+00	-0.00E+00	0.00E+00	-0.00E+00	0.00E+00	0.00E+00
																										0.00E+00	0.00E+00	-0.00E+00	0.00E+00	-0.00E+00	0.00E+00		0.00E+00	0.00E+00	-0.00E+00	0.00E+00	-0.00E+00	0.00E+00	0.00E+00
																										0.00E+00	0.00E+00	-0.00E+00	0.00E+00	-0.00E+00	0.00E+00		0.00E+00	0.00E+00	-0.00E+00	0.00E+00	-0.00E+00	0.00E+00	0.00E+00
																										0.00E+00	0.00E+00	-0.00E+00	0.00E+00	-0.00E+00	0.00E+00		0.00E+00	0.00E+00	-0.00E+00	0.00E+00	-0.00E+00	0.00E+00	0.00E+00
																										0.00E+00	0.00E+00	-0.00E+00	0.00E+00	-0.00E+00	0.00E+00		0.00E+00	0.00E+00	-0.00E+00	0.00E+00	-0.00E+00	0.00E+00	0.00E+00
																										0.00E+00	0.00E+00	-0.00E+00	0.00E+00	-0.00E+00	0.00E+00		0.00E+00	0.00E+00	-0.00E+00	0.00E+00	-0.00E+00	0.00E+00	0.00E+00
																										0.00E+00	0.00E+00	-0.00E+00	0.00E+00	-0.00E+00	0.00E+00		0.00E+00	0.00E+00	-0.00E+00	0.00E+00	-0.00E+00	0.00E+00	0.00E+00
																										0.00E+00	0.00E+00	-0.00E+00	0.00E+00	-0.00E+00	0.00E+00		0.00E+00	0.00E+00	-0.00E+00	0.00E+00	-0.00E+00	0.00E+00	0.00E+00
																										0.00E+00	0.00E+00	-0.00E+00	0.00E+00	-0.00E+00	0.00E+00		0.00E+00	0.00E+00	-0.00E+00	0.00E+00	-0.00E+00	0.00E+00	0.00E+00
																										0.00E+00	0.00E+00	-0.00E+00	0.00E+00	-0.00E+00	0.00E+00		0.00E+00	0.00E+00	-0.00E+00	0.00E+00	-0.00E+00	0.00E+00	0.00E+00
																										0.00E+00	0.00E+00	-0.00E+00	0.00E+00	-0.00E+00	0.00E+00		0.00E+00	0.00E+00	-0.00E+00	0.00E+00	-0.00E+00	0.00E+00	0.00E+00
																										0.00E+00	0.00E+00	-0.00E+00	0.00E+00	-0.00E+00	0.00E+00		0.00E+00	0.00E+00	-0.00E+00	0.00E+00	-0.00E+00	0.00E+00	0.00E+00
																										0.00E+00	0.00E+00	-0.00E+00	0.00E+00	-0.00E+00	0.00E+00		0.00E+00	0.00E+00	-0.00E+00	0.00E+00	-0.00E+00	0.00E+00	0.00E+00
																										0.00E+00	0.00E+00	-0.00E+00	0.00E+00	-0.00E+00	0.00E+00		0.00E+00	0.00E+00	-0.00E+00	0.00E+00	-0.00E+00	0.00E+00	0.00E+00
																										0.00E+00	0.00E+00	-0.00E+00	0.00E+00	-0.00E+00	0.00E+00		0.00E+00	0.00E+00	-0.00E+00	0.00E+00	-0.00E+00	0.00E+00	0.00E+00
																										0.00E+00	0.00E+00	-0.00E+00	0.00E+00	-0.00E+00	0.00E+00		0.00E+00	0.00E+00	-0.00E+00	0.00E+00	-0.00E+00	0.00E+00	0.00E+00
																										0.00E+00	0.00E+00	-0.00E+00	0.00E+00	-0.00E+00	0.00E+00		0.00E+00	0.00E+00	-0.00E+00	0.00E+00	-0.00E+00	0.00E+00	0.00E+00
																										0.00E+00	0.00E+00	-0.00E+00	0.00E+00	-0.00E+00	0.00E+00		0.00E+00	0.00E+00	-0.00E+00	0.00E+00	-0.00E+00	0.00E+00	0.00E+00
																										0.00E+00	0.00E+00	-0.00E+00	0.00E+00	-0.00E+00	0.00E+00		0.00E+00	0.00E+00	-0.00E+00	0.00E+00	-0.00E+00	0.00E+00	0.00E+00
																										0.00E+00	0.00E+00	-0.00E+00	0.00E+00	-0.00E+00	0.00E+00		0.00E+00	0.00E+00	-0.00E+00	0.00E+00	-0.00E+00	0.00E+00	0.00E+00
																										0.00E+00	0.00E+00	-0.00E+00	0.00E+00	-0.00E+00	0.00E+00		0.00E+00	0.00E+00	-0.00E+00	0.00E+00	-0.00E+00	0.00E+00	0.00E+00
																										0.00E+00	0.00E+00	-0.00E+00	0.00E+00	-0.00E+00	0.00E+00		0.00E+00	0.00E+00	-0.00E+00	0.00E+00	-0.00E+00	0.00E+00	0.00E+00
																										0.00E+00	0.00E+00	-0.00E+00	0.00E+00	-0.00E+00	0.00E+00		0.00E+00	0.00E+00	-0.00E+00	0.00E+00	-0.00E+00	0.00E+00	0.00E+00
																										0.00E+00	0.00E+00	-0.00E+00	0.00E+00	-0.00E+00	0.00E+00		0.00E+00	0.00E+00	-0.00E+00	0.00E+00	-0.00E+00	0.00E+00	0.00E+00
																										0.00E+00	0.00E+00	-0.00E+00	0.00E+00	-0.00E+00	0.00E+00		0.00E+00	0.00E+00	-0.00E+00	0.00E+00	-0.00E+00	0.00E+00	0.00E+00
																										0.00E+00	0.00E+00	-0.00E+00	0.00E+00	-0.00E+00	0.00E+00		0.00E+00	0.00E+00	-0.00E+00	0.00E+00	-0.00E+00	0.00E+00	0.00E+00
																										0.00E+00	0.00E+00	-0.00E+00	0.00E+00	-0.00E+00	0.00E+00		0.00E+00	0.00E+00	-0.00E+00	0.00E+00	-0.00E+00	0.00E+00	0.00E+00
																										0.00E+00	0.00E+00	-0.00E+00	0.00E+00	-0.00E+00	0.00E+00		0.00E+00	0.00E+00	-0.00E+00	0.00E+00	-0.00E+00	0.00E+00	0.00E+00
																										0.00E+00	0.00E+00	-0.00E+00	0.00E+00	-0.00E+00	0.00E+00		0.00E+00	0.00E+00	-0.00E+00	0.00E+00	-0.00E+00	0.00E+00	0.00E+00
																										0.00E+00	0.00E+00	-0.00E+00	0.00E+00	-0.00E+00	0.00E+00		0.00E+00	0.00E+00	-0.00E+00	0.00E+00	-0.00E+00	0.00E+00	0.00E+00
																										0.00E+00	0.00E+00	-0.00E+00	0.00E+00	-0.00E+00	0.00E+00		0.00E+00	0.00E+00	-0.00E+00	0.00E+00	-0.00E+00	0.00E+00	0.00E+00
																										0.00E+00	0.00E+00	-0.00E+00	0.00E+00	-0.00E+00	0.00E+00		0.00E+00	0.00E+00	-0.00E+00	0.00E+00	-0.00E+00	0.00E+00	0.00E+00
																										0.00E+00	0.00E+00	-0.00E+00	0.00E+00	-0.00E+00	0.00E+00		0.00E+00	0.00E+00	-0.00E+00	0.00E+00	-0.00E+00	0.00E+00	0.00E+00
																										0.00E+00	0.00E+00	-0.00E+00	0.00E+00	-0.00E+00	0.00E+00		0.00E+00	0.00E+00	-0.00E+00	0.00E+00	-0.00E+00	0.00E+00	0.00E+00
																										0.00E+00	0.00E+00	-0.00E+00	0.00E+00	-0.00E+00	0.00E+00		0.00E+00	0.00E+00	-0.00E+00	0.00E+00	-0.00E+00	0.00E+00	0.00E+00
																										0.00E+00	0.00E+00	-0.00E+00	0.00E+00	-0.00E+00	0.00E+00		0.00E+00	0.00E+00	-0.00E+00	0.00E+00	-0.00E+00	0.00E+00	0.00E+00
																										0.00E+00	0.00E+00	-0.00E+00	0.00E+00	-0.00E+00	0.00E+00		0.00E+00	0.00E+00	-0.00E+00	0.00E+00	-0.00E+00	0.00E+00	0.00E+00
																										0.00E+00	0.00E+00	-0.00E+00	0.00E+00	-0.00E+00	0.00E+00		0.00E+00	0.00E+00	-0.00E+00	0.00E+00	-0.00E+00	0.00E+00	0.00E+00
																										0.00E+00	0.00E+00	-0.00E+00	0.00E+00	-0.00E+00	0.00E+00		0.00E+00	0.00E+00	-0.00E+00	0.00E+00	-0.00E+00	0.00E+00	0.00E+00
																										0.00E+00	0.00E+00	-0.00E+00	0.00E+00	-0.00E+00	0.00E+00		0.00E+00	0.00E+00	-0.00E+00	0.00E+00	-0.00E+00	0.00E+00	0.00E+00
																										0.00E+00	0.00E+00	-0.00E+00	0.00E+00	-0.00E+00	0.00E+00		0.00E+00	0.00E+00	-0.00E+00	0.00E+00	-0.00E+00	0.00E+00	0.00E+00
																										0.00E+00	0.00E+00	-0.00E+00	0.00E+00	-0.00E+00	0.00E+00		0.00E+00	0.00E+00	-0.00E+00	0.00E+00	-0.00E+00	0.00E+00	0.00E+00
																										0.00E+00	0.00E+00	-0.00E+00	0.00E+00	-0.00E+00	0.00E+00		0.00E+00	0.00E+00	-0.00E+00	0.00E+00	-0.00E+00	0.00E+00	0.00E+00
																										0.00E+00	0.00E+00	-0.00E+00	0.00E+00	-0.00E+00	0.00E+00		0.00E+00	0.00E+00	-0.00E+00	0.00E+00	-0.00E+00	0.00E+00	0.00E+00
																										0.00E+00	0.00E+00	-0.00E+00	0.00E+00	-0.00E+00	0.00E+00		0.00E+00	0.00E+00	-0.00E+00	0.00E+00	-0.00E+00	0.00E+00	0.00E+00
																										0.00E+00	0.00E+00	-0.00E+00	0.00E+00	-0.00E+00	0.00E+00		0.00E+00	0.00E+00	-0.00E+00	0.00E+00	-0.00E+00	0.00E+00	0.00E+00
																										0.00E+00	0.00E+00	-0.00E+00	0.00E+00	-0.00E+00	0.00E+00		0.00E+00	0.00E+00	-0.00E+00	0.00E+00	-0.00E+00	0.00E+00	0.00E+00
																										0.00E+00	0.00E+00	-0.00E+00	0.00E+00	-0.00E+00	0.00E+00		0.00E+00	0.00E+00	-0.00E+00	0.00E+00	-0.00E+00	0.00E+00	0.00E+00
																										0.00E+00	0.00E+00	-0.00E+00	0.00E+00	-0.00E+00	0.00E+00		0.00E+00	0.00E+00	-0.00E+00	0.00E+00	-0.00E+00	0.00E+00	0.00E+00
																										0.00E+00	0.00E+00	-0.00E+00	0.00E+00	-0.00E+00	0.00E+00		0.00E+00	0.00E+00	-0.00E+00	0.00E+00	-0.00E+00	0.00E+00	0.00E+00
																										0.00E+00	0.00E+00	-0.00E+00	0.00E+00	-0.00E+00	0.00E+00		0.00E+00	0.00E+00	-0.00E+00	0.00E+00	-0.00E+00	0.00E+00	0.00E+00
																										0.00E+00	0.00E+00	-0.00E+00	0.00E+00	-0.00E+00	0.00E+00		0.00E+00	0.00E+00	-0.00E+00	0.00E+00	-0.00E+00	0.00E+00	0.00E+00
																										0.00E+00	0.00E+00	-0.00E+00	0.00E+00	-0.00E+00	0.00E+00		0.00E+00	0.00E+00	-0.00E+00	0.00E+00	-0.00E+00	0.00E+00	0.00E+00
																										0.00E+00	0.00E+00	-0.00E+00	0.00E+00	-0.00E+00	0.00E+00		0.00E+00	0.00E+00	-0.00E+00	0.00E+00	-0.00E+00	0.00E+00	0.00E+00
																										0.00E+00	0.00E+00	-0.00E+00	0.00E+00	-0.00E+00	0.00E+00		0.00E+00	0.00E+00	-0.00E+00	0.00E+00	-0.00E+00	0.00E+00	0.00E+00
																										0.00E+00	0.00E+00	-0.00E+00	0.00E+00	-0.00E+00	0.00E+00		0.00E+00	0.00E+00	-0.00E+00	0.00E+00	-0.00E+00	0.00E+00	0.00E+00
																										0.00E+00	0.00E+00	-0.00E+00	0.00E+00	-0.00E+00	0.00E+00		0.00E+00	0.00E+00	-0.00E+00	0.00E+00	-0.00E+00	0.00E+00	0.00E+00
																										0.00E+00	0.00E+00	-0.00E+00	0.00E+00	-0.00E+00	0.00E+00		0.00E+00	0.00E+00	-0.00E+00	0.00E+00	-0.00E+00	0.00E+00	0.00E+00
																										0.00E+00	0.00E+00	-0.00E+00	0.00E+00	-0.00E+00	0.00E+00		0.00E+00	0.00E+00	-0.00E+00	0.00E+00	-0.00E+00	0.00E+00	0.00E+00
																										0.00E+00	0.00E+00	-0.00E+00	0.00E+00	-0.00E+00	0.00E+00		0.00E+00	0.00E+00	-0.00E+00	0.00E+00	-0.00E+00	0.00E+00	0.00E+00
																										0.00E+00	0.00E+00	-0.00E+00	0.00E+00	-0.00E+00	0.00E+00		0.00E+00	0.00E+00	-0.00E+00	0.00E+00	-0.00E+00	0.00E+00	0.00E+00
																										0.00E+00	0.00E+00	-0.00E+00	0.00E+00	-0.00E+00	0.00E+00		0.00E+00	0.00E+00	-0.00E+00	0.00E+00	-0.00E+00	0.00E+00	0.00E+00
																										0.00E+00	0.00E+00	-0.00E+00	0.00E+00	-0.00E+00	0.00E+00		0.00E+00	0.00E+00	-0.00E+00	0.00E+00	-0.00E+00	0.00E+00	0.00E+00
																										0.00E+00	0.00E+00	-0.00E+00	0.00E+00	-0.00E+00	0.00E+00		0.00E+00	0.00E+00	-0.00E+00	0.00E+00	-0.00E+00	0.00E+00	0.00E+00
																										0.00E+00	0.00E+00	-0.00E+00	0.00E+00	-0.00E+00	0.00E+00		0.00E+00	0.00E+00	-0.00E+00	0.00E+00	-0.00E+00	0.00E+00	0.00E+00
																										0.00E+00	0.00E+00	-0.00E+00	0.00E+00	-0.00E+00	0.00E+00		0.00E+00	0.00E+00	-0.00E+00	0.00E+00	-0.00E+00	0.00E+00	0.00E+00
																										0.00E+00	0.00E+00	-0.00E+00	0.00E+00	-0.00E+00	0.00E+00		0.00E+00	0.00E+00	-0.00E+00	0.00E+00	-0.00E+00	0.00E+00	0.00E+00
																										0.00E+00	0.00E+00	-0.00E+00	0.00E+00	-0.00E+00	0.00E+00		0.00E+00	0.00E+00	-0.00E+00	0.00E+00	-0.00E+00	0.00E+00	0.00E+00
																										0.00E+00	0.00E+00	-0.00E+00	0.00E+00	-0.00E+00	0.00E+00		0.00E+00	0.00E+00	-0.00E+00	0.00E+00	-0.00E+00	0.00E+00	0.00E+00
																										0.00E+00	0.00E+00	-0.00E+00	0.00E+00	-0.00E+00	0.00E+00		0.00E+00	0.00E+00	-0.00E+00	0.00E+00	-0.00E+00	0.00E+00	0.00E+00
																										0.00E+00	0.00E+00	-0.00E+00	0.00E+00	-0.00E+00	0.00E+00		0.00E+00	0.00E+00	-0.00E+00	0.00E+00	-0.00E+00	0.00E+00	0.00E+00
																										0.00E+00	0.00E+00	-0.00E+00	0.00E+00	-0.00E+00	0.00E+00		0.00E+00	0.00E+00	-0.00E+00	0.00E+00	-0.00E+00	0.00E+00	0.00E+00
																										0.00E+00	0.00E+00	-0.00E+00	0.00E+00	-0.00E+00	0.00E+00		0.00E+00	0.00E+00	-0.00E+00	0.00E+00	-0.00E+00	0.00E+00	0.00E+00
																										0.00E+00	0.00E+00	-0.00E+00	0.00E+00	-0.00E+00	0.00E+00		0.00E+00	0.00E+00	-0.00E+00	0.00E+00	-0.00E+00	0.00E+00	0.00E+00
																										0.00E+00	0.00E+00	-0.00E+00	0.00E+00	-0.00E+00	0.00E+00		0.00E+00	0.00E+00	-0.00E+00	0.00E+00	-0.00E+00	0.00E+00	0.00E+00
																										0.00E+00	0.00E+00	-0.00E+00	0.00E+00	-0.00E+00	0.00E+00		0.00E+00	0.00E+00	-0.00E+00	0.00E+00	-0.00E+00	0.00E+00	0.00E+00
																										0.00E+00	0.00E+00	-0.00E+00	0.00E+00	-0.00E+00	0.00E+00		0.00E+00	0.00E+00	-0.00E+00	0.00E+00	-0.00E+00	0.00E+00	0.00E+00
																										0.00E+00	0.00E+00	-0.00E+00	0.00E+00	-0.00E+00	0.00E+00		0.00E+00	0.00E+00	-0.00E+00	0.00E+00	-0.00E+00	0.00E+00	0.00E+00
																										0.00E+00	0.00E+00	-0.00E+00	0.00E+00	-0.00E+00	0.00E+00		0.00E+00	0.00E+00	-0.00E+00	0.00E+00	-0.00E+00	0.00E+00	0.00E+00
																										0.00E+00	0.00E+00	-0.00E+00	0.00E+00	-0.00E+00	0.00E+00		0.00E+00	0.00E+00	-0.00E+00	0.00E+00	-0.00E+00	0.00E+00	0.00E+00
																										0.00E+00	0.00E+00	-0.00E+00	0.00E+00	-0.00E+00	0.00E+00		0.00E+00	0.00E+00	-0.00E+00	0.00E+00	-0.00E+00	0.00E+00	0.00E+00
																										0.00E+00	0.00E+00	-0.00E+00	0.00E+00	-0.00E+00	0.00E+00		0.00E+00	0.00E+00	-0.00E+00	0.00E+00	-0.00E+00	0.00E+00	0.00E+00
																										0.00E+00	0.00E+00	-0.00E+00	0.00E+00	-0.00E+00	0.00E+00		0.00E+00	0.00E+00	-0.00E+00	0.00E+00	-0.00E+00	0.00E+00	0.00E+00
																										0.00E+00	0.00E+00	-0.00E+00	0.00E+00	-0.00E+00	0.00E+00		0.00E+00	0.00E+00	-0.00E+00	0.00E+00	-0.00E+00	0.00E+00	0.00E+00
																										0.00E+00	0.00E+00	-0.00E+00	0.00E+00	-0.00E+00	0.00E+00		0.00E+00	0.00E+00	-0.00E+00	0.00E+00	-0.00E+00	0.00E+00	0.00E+00
																										0.00E+00	0.00E+00	-0.00E+00	0.00E+00	-0.00E+00	0.00E+00		0.00E+00	0.00E+00	-0.00E+00	0.00E+00	-0.00E+00	0.00E+00	0.00E+00
																										0.00E+00	0.00E+00	-0.00E+00	0.00E+00	-0.00E+00	0.00E+00		0.00E+00	0.00E+00	-0.00E+00	0.00E+00	-0.00E+00	0.00E+00	0.00E+00
																										0.00E+00	0.00E+00	-0.00E+00	0.00E+00	-0.00E+00	0.00E+00		0.00E+00	0.00E+00	-0.00E+00	0.00E+00	-0.00E+00	0.00E+00	0.00E+00
																										0.00E+00	0.00E+00	-0.00E+00	0.00E+00	-0.00E+00	0.00E+00		0.00E+00	0.00E+00	-0.00E+00	0.00E+00	-0.00E+00	0.00E+00	0.00E+00
																										0.00E+00	0.00E+00	-0.00E+00	0.00E+00	-0.00E+00	0.00E+00		0.00E+00	0.00E+00	-0.00E+00	0.00E+00	-0.00E+00	0.00E+00	0.00E+00
																										0.00E+00	0.00E+00	-0.00E+00	0.00E+00	-0.00E+00	0.00E+00		0.00E+00	0.00E+00	-0.00E+00	0.00E+00	-0.00E+00	0.00E+00	0.00E+00
																										0.00E+00	0.00E+00	-0.00E+00	0.00E+00	-0.00E+00	0.00E+00		0.00E+00	0.00E+00	-0.00E+00	0.00E+00	-0.00E+00	0.00E+00	0.00E+00
																										0.00E+00	0.00E+00	-0.00E+00	0.00E+00	-0.00E+00	0.00E+00		0.00E+00	0.00E+00	-0.00E+00	0.00E+00	-0.00E+00	0.00E+00	0.00E+00
																										0.00E+00	0.00E+00	-0.00E+00	0.00E+00	-0.00E+00	0.00E+00		0.00E+00	0.00E+00	-0.00E+00	0.00E+00	-0.00E+00	0.00E+00	0.00E+00
																										0.00E+00	0.00E+00	-0.00E+00	0.00E+00	-0.00E+00	0.00E+00		0.00E+00	0.00E+00	-0.00E+00	0.00E+00	-0.00E+00	0.00E+00	0.00E+00
																										0.00E+00	0.00E+00	-0.00E+00	0.00E+00	-0.00E+00	0.00E+00		0.00E+00	0.00E+00	-0.00E+00	0.00E+00	-0.00E+00	0.00E+00	0.00E+00
																										0.00E+00	0.00E+00	-0.00E+00	0.00E+00	-0.00E+00	0.00E+00		0.00E+00	0.00E+00	-0.00E+00	0.00E+00	-0.00E+00	0.00E+00	0.00E+00
																										0.00E+00	0.00E+00	-0.00E+00	0.00E+00	-0.00E+00	0.00E+00		0.00E+00	0.00E+00	-0.00E+00	0.00E+00	-0.00E+00	0.00E+00	0.00E+00
																										0.00E+00	0.00E+00	-0.00E+00	0.00E+00	-0.00E+00	0.00E+00		0.00E+00	0.00E+00	-0.00E+00	0.00E+00	-0.00E+00	0.00E+00	0.00E+00
																										0.00E+00	0.00E+00	-0.00E+00	0.00E+00	-0.00E+00	0.00E+00		0.00E+00	0.00E+00	-0.00E+00	0.00E+00	-0.00E+00	0.00E+00	0.00E+00
																										0.00E+00	0.00E+00	-0.00E+00	0.00E+00	-0.00E+00	0.00E+00		0.00E+00	0.00E+00	-0.00E+00	0.00E+00	-0.00E+00	0.00E+00	0.00E+00
																										0.00E+00	0.00E+00	-0.00E+00	0.00E+00	-0.00E+00	0.00E+00		0.00E+00	0.00E+00	-0.00E+00	0.00E+00	-0.00E+00	0.00E+00	0.00E+00
																										0.00E+00	0.00E+00	-0.00E+00	0.00E+00	-0.00E+00	0.00E+00		0.00E+00	0.00E+00	-0.00E+00	0.00E+00	-0.00E+00	0.00E+00	0.00E+00
																										0.00E+00	0.00E+00	-0.00E+00	0.00E+00	-0.00E+00	0.00E+00		0.00E+00	0.00E+00	-0.00E+00	0.00E+00	-0.00E+00	0.00E+00	0.00E+00
																										0.00E+00	0.00E+00	-0.00E+00	0.00E+00	-0.00E+00	0.00E+00		0.00E+00	0.00E+00	-0.00E+00	0.00E+00	-0.00E+00	0.00E+00	0.00E+00
																										0.00E+00	0.00E+00	-0.00E+00	0.00E+00	-0.00E+00	0.00E+00		0.00E+00	0.00E+00	-0.00E+00	0.00E+00	-0.00E+00	0.00E+00	0.00E+00
																										0.00E+00	0.00E+00	-0.00E+00	0.00E+00	-0.00E+00	0.00E+00		0.00E+00	0.00E+00	-0.00E+00	0.00E+00	-0.00E+00	0.00E+00	0.00E+00
																										0.00E+00	0.00E+00	-0.00E+00	0.00E+00	-0.00E+00	0.00E+00		0.00E+00	0.00E+00	-0.00E+00	0.00E+00	-0.00E+00	0.00E+00	0.00E+00
																										0.00E+00	0.00E+00	-0.00E+00	0.00E+00	-0.00E+00	0.00E+00		0.00E+00	0.00E+00	-0.00E+00	0.00E+00	-0.00E+00	0.00E+00	0.00E+00
																										0.00E+00	0.00E+00	-0.00E+00	0.00E+00	-0.00E+00	0.00E+00		0.00E+00	0.00E+00	-0.00E+00	0.00E+00	-0.00E+00	0.00E+00	0.00E+00
																										0.00E+00	0.00E+00	-0.00E+00	0.00E+00	-0.00E+00	0.00E+00		0.00E+00	0.00E+00	-0.00E+00	0.00E+00	-0.00E+00	0.00E+00	0.00E+00
																										0.00E+00	0.00E+00	-0.00E+00	0.00E+00	-0.00E+00	0.00E+00		0.00E+00	0.00E+00	-0.00E+00	0.00E+00	-0.00E+00	0.00E+00	0.00E+00
																										0.00E+00	0.00E+00	-0.00E+00	0.00E+00	-0.00E+00	0.00E+00		0.00E+00	0.00E+00	-0.00E+00	0.00E+00	-0.00E+00	0.00E+00	0.00E+00
																										0.00E+00	0.00E+00	-0.00E+00	0.00E+00	-0.00E+00	0.00E+00		0.00E+00	0.00E+00	-0.00E+00	0.00E+00	-0.00E+00	0.00E+00	0.00E+00
																										0.00E+00	0.00E+00	-0.00E+00	0.00E+00	-0.00E+00	0.00E+00		0.00E+00	0.00E+00	-0.00E+00	0.00E+00	-0.00E+00	0.00E+00	0.00E+00
																										0.00E+00	0.00E+00	-0.00E+00	0.00E+00	-0.00E+00	0.00E+00		0.00E+00	0.00E+00	-0.00E+00	0.00E+00	-0.00E+00	0.00E+00	0.00E+00
																										0.00E+00	0.00E+00	-0.00E+00	0.00E+00	-0.00E+00	0.00E+00		0.00E+00	0.00E+00	-0.00E+00	0.00E+00	-0.00E+00	0.00E+00	0.00E+00
																										0.00E+00	0.00E+00	-0.00E+00	0.00E+00	-0.00E+00	0.00E+00		0.00E+00	0.00E+00	-0.00E+00	0.00E+00	-0.00E+00	0.00E+00	0.00E+00
																										0.00E+00	0.00E+00	-0.00E+00	0.00E+00	-0.00E+00	0.00E+00		0.00E+00	0.00E+00	-0.00E+00	0.00E+00	-0.00E+00	0.00E+00	0.00E+00
																										0.00E+00	0.00E+00	-0.00E+00	0.00E+00	-0.00E+00	0.00E+00		0.00E+00	0.00E+00	-0.00E+00	0.00E+00	-0.00E+00	0.00E+00	0.00E+00
																										0.00E+00	0.00E+00	-0.00E+00	0.00E+00	-0.00E+00	0.00E+00		0.00E+00	0.00E+00	-0.00E+00	0.00E+00	-0.00E+00	0.00E+00	0.00E+00
																										0.00E+00	0.00E+00	-0.00E+00	0.00E+00	-0.00E+00	0.00E+00		0.00E+00	0.00E+00	-0.00E+00	0.00E+00	-0.00E+00	0.00E+00	0.00E+00
																										0.00E+00	0.00E+00	-0.00E+00	0.00E+00	-0.00E+00	0.00E+00		0.00E+00	0.00E+00	-0.00E+00	0.00E+00	-0.00E+00	0.00E+00	0.00E+00
																										0.00E+00	0.00E+00	-0.00E+00	0.00E+00	-0.00E+00	0.00E+00		0.00E+00	0.00E+00	-0.00E+00	0.00E+00	-0.00E+00	0.00E+00	0.00E+00
																										0.00E+00	0.00E+00	-0.00E+00	0.00E+00	-0.00E+00	0.00E+00		0.00E+00	0.00E+00	-0.00E+00	0.00E+00	-0.00E+00	0.00E+00	0.00E+00
																										0.00E+00	0.00E+00	-0.00E+00	0.00E+00	-0.00E+00	0.00E+00		0.00E+00	0.00E+00	-0.00E+00	0.00E+00	-0.00E+00	0.00E+00	0.00E+00
																										0.00E+00	0.00E+00	-0.00E+00	0.00E+00	-0.00E+00	0.00E+00		0.00E+00	0.00E+00	-0.00E+00	0.00E+00	-0.00E+00	0.00E+00	0.00E+00
																										0.00E+00	0.00E+00	-0.00E+00	0.00E+00	-0.00E+00	0.00E+00		0.00E+00	0.00E+00	-0.00E+00	0.00E+00	-0.00E+00	0.00E+00	0.00E+00
																										0.00E+00	0.00E+00	-0.00E+00	0.00E+00	-0.00E+00	0.00E+00		0.00E+00	0.00E+00	-0.00E+00	0.00E+00	-0.00E+00	0.00E+00	0.00E+00
																										0.00E+00	0.00E+00	-0.00E+00	0.00E+00	-0.00E+00	0.00E+00		0.00E+00	0.00E+00	-0.00E+00	0.00E+00	-0.00E+00	0.00E+00	0.00E+00
																										0.00E+00	0.00E+00	-0.00E+00	0.00E+00	-0.00E+00	0.00E+00		0.00E+00	0.00E+00	-0.00E+00	0.00E+00	-0.00E+00	0.00E+00	0.00E+00
																										0.00E+00	0.00E+00	-0.00E+00	0.00E+00	-0.00E+00	0.00E+00		0.00E+00	0.00E+00	-0.00E+00	0.00E+00	-0.00E+00	0.00E+00	0.00E+00
																										0.00E+00	0.00E+00	-0.00E+00	0.00E+00	-0.00E+00	0.00E+00		0.00E+00	0.00E+00	-0.00E+00	0.00E+00	-0.00E+00	0.00E+00	0.00E+00
																										0.00E+00	0.00E+00	-0.00E+00	0.00E+00	-0.00E+00	0.00E+00		0.00E+00	0.00E+00	-0.00E+00	0.00E+00	-0.00E+00	0.00E+00	0.00E+00
																										0.00E+00	0.00E+00	-0.00E+00	0.00E+00	-0.00E+00	0.00E+00		0.00E+00	0.00E+00	-0.00E+00	0.00E+00	-0.00E+00	0.00E+00	0.00E+00
																										0.00E+00	0.00E+00	-0.00E+00	0.00E+00	-0.00E+00	0.00E+00		0.00E+00	0.00E+00	-0.00E+00	0.00E+00	-0.00E+00	0.00E+00	0.00E+00
																										0.00E+00	0.00E+00	-0.00E+00	0.00E+00	-0.00E+00	0.00E+00		0.00E+00	0.00E+00	-0.00E+00	0.00E+00	-0.00E+00	0.00E+00	0.00E+00
																										0.00E+00	0.00E+00	-0.00E+00	0.00E+00	-0.00E+00	0.00E+00		0.00E+00	0.00E+00	-0.00E+00	0.00E+00	-0.00E+00	0.00E+00	0.00E+00
																										0.00E+00	0.00E+00	-0.00E+00	0.00E+00	-0.00E+00	0.00E+00		0.00E+00	0.00E+00	-0.00E+00	0.00E+00	-0.00E+00	0.00E+00	0.00E+00
																										0.00E+00	0.00E+00	-0.00E+00	0.00E+00	-0.00E+00	0.00E+00		0.00E+00	0.00E+00	-0.00E+00	0.00E+00	-0.00E+00	0.00E+00	0.00E+00
																										0.00E+00	0.00E+00	-0.00E+00	0.00E+00	-0.00E+00	0.00E+00		0.00E+00	0.00E+00	-0.00E+00	0.00E+00	-0.00E+00	0.00E+00	0.00E+00
																										0.00E+00	0.00E+00	-0.00E+00	0.00E+00	-0.00E+00	0.00E+00		0.00E+00	0.00E+00	-0.00E+00	0.00E+00	-0.00E+00	0.00E+00	0.00E+00
																										0.00E+00	0.00E+00	-0.00E+00	0.00E+00	-0.00E+00	0.00E+00		0.00E+00	0.00E+00	-0.00E+00	0.00E+00	-0.00E+00	0.00E+00	0.00E+00
																										0.00E+00	0.00E+00	-0.00E+00	0.00E+00	-0.00E+00	0.00E+00		0.00E+00	0.00E+00	-0.00E+00	0.00E+00	-0.00E+00	0.00E+00	0.00E+00
																										0.00E+00	0.00E+00	-0.00E+00	0.00E+00	-0.00E+00	0.00E+00		0.00E+00	0.00E+00	-0.00E+00	0.00E+00	-0.00E+00	0.00E+00	0.00E+00
																										0.00E+00	0.00E+00	-0.00E+00	0.00E+00	-0.00E+00	0.00E+00		0.00E+00	0.00E+00	-0.00E+00	0.00E+00	-0.00E+00	0.00E+00	0.00E+00
																										0.00E+00	0.00E+00	-0.00E+00	0.00E+00	-0.00E+00	0.00E+00		0.00E+00	0.00E+00	-0.00E+00	0.00E+00	-0.00E+00	0.00E+00	0.00E+00
																										0.00E+00	0.00E+00	-0.00E+00	0.00E+00	-0.00E+00	0.00E+00		0.00E+00	0.00E+00	-0.00E+00	0.00E+00	-0.00E+00	0.00E+00	0.00E+00
																										0.00E+00	0.00E+00	-0.00E+00	0.00E+00	-0.00E+00	0.00E+00		0.00E+00	0.00E+00	-0.00E+00	0.00E+00	-0.00E+00	0.00E+00	0.00E+00
																										0.00E+00	0.00E+00	-0.00E+00	0.00E+00	-0.00E+00	0.00E+00		0.00E+00	0.00E+00	-0.00E+00	0.00E+00	-0.00E+00	0.00E+00	0.00E+00
																										0.00E+00	0.00E+00	-0.00E+00	0.00E+00	-0.00E+00	0.00E+00		0.00E+00	0.00E+00	-0.00E+00	0.00E+00	-0.00E+00	0.00E+00	0.00E+00
																										0.00E+00	0.00E+00	-0.00E+00	0.00E+00	-0.00E+00	0.00E+00		0.00E+00	0.00E+00	-0.00E+00	0.00E+00	-0.00E+00	0.00E+00	0.00E+00
																										0.00E+00	0.00E+00	-0.00E+00	0.00E+00	-0.00E+00	0.00E+00		0.00E+00	0.00E+00	-0.00E+00	0.00E+00	-0.00E+00	0.00E+00	0.00E+00
																										0.00E+00	0.00E+00	-0.00E+00	0.00E+00	-0.00E+00	0.00E+00		0.00E+00	0.00E+00	-0.00E+00	0.00E+00	-0.00E+00	0.00E+00	0.00E+00
																										0.00E+00	0.00E+00	-0.00E+00	0.00E+00	-0.00E+00	0.00E+00		0.00E+00	0.00E+00	-0.00E+00	0.00E+00	-0.00E+00	0.00E+00	0.00E+00
																										0.00E+00	0.00E+00	-0.00E+00	0.00E+00	-0.00E+00	0.00E+00		0.00E+00	0.00E+00	-0.00E+00	0.00E+00	-0.00E+00	0.00E+00	0.00E+00
																										0.00E+00	0.00E+00	-0.00E+00	0.00E+00	-0.00E+00	0.00E+00		0.00E+00	0.00E+00	-0.00E+00	0.00E+00	-0.00E+00	0.00E+00	0.00E+00
																										0.00E+00	0.00E+00	-0.00E+00	0.00E+00	-0.00E+00	0.00E+00		0.00E+00	0.00E+00	-0.00E+00	0.00E+00	-0.00E+00	0.00E+00	0.00E+00
																										0.00E+00	0.00E+00	-0.00E+00	0.00E+00	-0.00E+00	0.00E+00		0.00E+00	0.00E+00	-0.00E+00	0.00E+00	-0.00E+00	0.00E+00	0.00E+00
																										0.00E+00	0.00E+00	-0.00E+00	0.00E+00	-0.00E+00	0.00E+00		0.00E+00	0.00E+00	-0.00E+00	0.00E+00	-0.00E+00	0.00E+00	0.00E+00
																										0.00E+00	0.00E+00	-0.00E+00	0.00E+00	-0.00E+00	0.00E+00		0.00E+00	0.00E+00	-0.00E+00	0.00E+00	-0.00E+00	0.00E+00	0.00E+00
																										0.00E+00	0.00E+00	-0.00E+00	0.00E+00	-0.00E+00	0.00E+00		0.00E+00	0.00E+00	-0.00E+00	0.00E+00	-0.00E+00	0.00E+00	0.00E+00
																										0.00E+00	0.00E+00	-0.00E+00	0.00E+00	-0.00E+00	0.00E+00		0.00E+00	0.00E+00	-0.00E+00	0.00E+00	-0.00E+00	0.00E+00	0.00E+00
																										0.00E+00	0.00E+00	-0.00E+00	0.00E+00	-0.00E+00	0.00E+00		0.00E+00	0.00E+00	-0.00E+00	0.00E+00	-0.00E+00	0.00E+00	0.00E+00
																										0.00E+00	0.00E+00	-0.00E+00	0.00E+00	-0.00E+00	0.00E+00		0.00E+00	0.00E+00	-0.00E+00	0.00E+00	-0.00E+00	0.00E+00	0.00E+00
																										0.00E+00	0.00E+00	-0.00E+00	0.00E+00	-0.00E+00	0.00E+00		0.00E+00	0.00E+00	-0.00E+00	0.00E+00	-0.00E+00	0.00E+00	0.00E+00
																										0.00E+00	0.00E+00	-0.00E+00	0.00E+00	-0.00E+00	0.00E+00		0.00E+00	0.00E+00	-0.00E+00	0.00E+00	-0.00E+00	0.00E+00	0.00E+00
																										0.00E+00	0.00E+00	-0.00E+00	0.00E+00	-0.00E+00	0.00E+00		0.00E+00	0.00E+00	-0.00E+00	0.00E+00	-0.00E+00	0.00E+00	0.00E+00
																										0.00E+00	0.00E+00	-0.00E+00	0.00E+00	-0.00E+00	0.00E+00		0.00E+00	0.00E+00	-0.00E+00	0.00E+00	-0.00E+00	0.00E+00	0.00E+00
																										0.00E+00	0.00E+00	-0.00E+00	0.00E+00	-0.00E+00	0.00E+00		0.00E+00	0.00E+00	-0.00E+00	0.00E+00	-0.00E+00	0.00E+00	0.00E+00
																										0.00E+00	0.00E+00	-0.00E+00	0.00E+00	-0.00E+00	0.00E+00		0.00E+00	0.00E+00	-0.00E+00	0.00E+00	-0.00E+00	0.00E+00	0.00E+00
																										0.00E+00	0.00E+00	-0.00E+00	0.00E+00	-0.00E+00	0.00E+00		0.00E+00	0.00E+00	-0.00E+00	0.00E+00	-0.00E+00	0.00E+00	0.00E+00
																										0.00E+00	0.00E+00	-0.00E+00	0.00E+00	-0.00E+00	0.00E+00		0.00E+00	0.00E+00	-0.00E+00	0.00E+00	-0.00E+00	0.00E+00	0.00E+00
																										0.00E+00	0.00E+00	-0.00E+00	0.00E+00	-0.00E+00	0.00E+00		0.00E+00	0.00E+00	-0.00E+00	0.00E+00	-0.00E+00	0.00E+00	0.00E+00
																										0.00E+00	0.00E+00	-0.00E+00	0.00E+00	-0.00E+00	0.00E+00		0.00E+00	0.00E+00	-0.00E+00	0.00E+00	-0.00E+00	0.00E+00	0.00E+00
																										0.00E+00	0.00E+00	-0.00E+00	0.00E+00	-0.00E+00	0.00E+00		0.00E+00	0.00E+00	-0.00E+00	0.00E+00	-0.00E+00	0.00E+00	0.00E+00
																										0.00E+00	0.00E+00	-0.00E+00	0.00E+00	-0.00E+00	0.00E+00		0.00E+00	0.00E+00	-0.00E+00	0.00E+00	-0.00E+00	0.00E+00	0.00E+00
																										0.00E+00	0.00E+00	-0.00E+00	0.00E+00	-0.00E+00	0.00E+00		0.00E+00	0.00E+00	-0.00E+00	0.00E+00	-0.00E+00	0.00E+00	0.00E+00
																										0.00E+00	0.00E+00	-0.00E+00	0.00E+00	-0.00E+00	0.00E+00		0.00E+00	0.00E+00	-0.00E+00	0.00E+00	-0.00E+00	0.00E+00	0.00E+00
																										0.00E+00	0.00E+00	-0.00E+00	0.00E+00	-0.00E+00	0.00E+00		0.00E+00	0.00E+00	-0.00E+00	0.00E+00	-0.00E+00	0.00E+00	0.00E+00
																										0.00E+00	0.00E+00	-0.00E+00	0.00E+00	-0.00E+00	0.00E+00		0.00E+00	0.00E+00	-0.00E+00	0.00E+00	-0.00E+00	0.00E+00	0.00E+00
																										0.00E+00	0.00E+00	-0.00E+00	0.00E+00	-0.00E+00	0.00E+00		0.00E+00	0.00E+00	-0.00E+00	0.00E+00	-0.00E+00	0.00E+00	0.00E+00
																										0.00E+00	0.00E+00	-0.00E+00	0.00E+00	-0.00E+00	0.00E+00		0.00E+00	0.00E+00	-0.00E+00	0.00E+00	-0.00E+00	0.00E+00	0.00E+00
																										0.00E+00	0.00E+00	-0.00E+00	0.00E+00	-0.00E+00	0.00E+00		0.00E+00	0.00E+00	-0.00E+00	0.00E+00	-0.00E+00	0.00E+00	0.00E+00
																										0.00E+00	0.00E+00	-0.00E+00	0.00E+00	-0.00E+00	0.00E+00		0.00E+00	0.00E+00	-0.00E+00	0.00E+00	-0.00E+00	0.00E+00	0.00E+00
																										0.00E+00	0.00E+00	-0.00E+00	0.00E+00	-0.00E+00	0.00E+00		0.00E+00	0.00E+00	-0.00E+00	0.00E+00	-0.00E+00	0.00E+00	0.00E+00
																										0.00E+00	0.00E+00	-0.00E+00	0.00E+00	-0.00E+00	0.00E+00		0.00E+00	0.00E+00	-0.00E+00	0.00E+00	-0.00E+00	0.00E+00	0.00E+00
																										0.00E+00	0.00E+00	-0.00E+00	0.00E+00	-0.00E+00	0.00E+00		0.00E+00	0.00E+00	-0.00E+00	0.00E+00	-0.00E+00	0.00E+00	0.00E+00
																										0.00E+00	0.00E+00	-0.00E+00	0.00E+00	-0.00E+00	0.00E+00		0.00E+00	0.00E+00	-0.00E+00	0.00E+00	-0.00E+00	0.00E+00	0.00E+00
																										0.00E+00	0.00E+00	-0.00E+00	0.00E+00	-0.00E+00	0.00E+00		0.00E+00	0.00E+00	-0.00E+00	0.00E+00	-0.00E+00	0.00E+00	0.00E+00
																										0.00E+00	0.00E+00	-0.00E+00	0.00E+00	-0.00E+00	0.00E+00		0.00E+00	0.00E+00	-0.00E+00	0.00E+00	-0.00E+00	0.00E+00	0.00E+00
																										0.00E+00	0.00E+00	-0.00E+00	0.00E+00	-0.00E+00	0.00E+00		0.00E+00	0.00E+00	-0.00E+00	0.00E+00	-0.00E+00	0.00E+00	0.00E+00
																										0.00E+00	0.00E+00	-0.00E+00	0.00E+00	-0.00E+00	0.00E+00		0.00E+00	0.00E+00	-0.00E+00	0.00E+00	-0.00E+00	0.00E+00	0.00E+00
																										0.00E+00	0.00E+00	-0.00E+00	0.00E+00	-0.00E+00	0.00E+00		0.00E+00	0.00E+00	-0.00E+00	0.00E+00	-0.00E+00	0.00E+00	0.00E+00
																										0.00E+00	0.00E+00	-0.00E+00	0.00E+00	-0.00E+00	0.00E+00		0.00E+00	0.00E+00	-0.00E+00	0.00E+00	-0.00E+00	0.00E+00	0.00E+00
																										0.00E+00	0.00E+00	-0.00E+00	0.00E+00	-0.00E+00	0.00E+00		0.00E+00	0.00E+00	-0.00E+00	0.00E+00	-0.00E+00	0.00E+00	0.00E+00
																										0.00E+00	0.00E+00	-0.00E+00	0.00E+00	-0.00E+00	0.00E+00		0.00E+00	0.00E+00	-0.00E+00	0.00E+00	-0.00E+00	0.00E+00	0.00E+00
																										0.00E+00	0.00E+00	-0.00E+00	0.00E+00	-0.00E+00	0.00E+00		0.00E+00	0.00E+00	-0.00E+00	0.00E+00	-0.00E+00	0.00E+00	0.00E+00
																										0.00E+00	0.00E+00	-0.00E+00	0.00E+00	-0.00E+00	0.00E+00		0.00E+00	0.00E+00	-0.00E+00	0.00E+00	-0.00E+00	0.00E+00	0.00E+00
																										0.00E+00	0.00E+00	-0.00E+00	0.00E+00	-0.00E+00	0.00E+00		0.00E+00	0.00E+00	-0.00E+00	0.00E+00	-0.00E+00	0.00E+00	0.00E+00
																										0.00E+00	0.00E+00	-0.00E+00	0.00E+00	-0.00E+00	0.00E+00		0.00E+00	0.00E+00	-0.00E+00	0.00E+00	-0.00E+00	0.00E+00	0.00E+00
																										0.00E+00	0.00E+00	-0.00E+00	0.00E+00	-0.00E+00	0.00E+00		0.00E+00	0.00E+00	-0.00E+00	0.00E+00	-0.00E+00	0.00E+00	0.00E+00
																										0.00E+00	0.00E+00	-0.00E+00	0.00E+00	-0.00E+00	0.00E+00		0.00E+00	0.00E+00	-0.00E+00	0.00E+00	-0.00E+00	0.00E+00	0.00E+00
																										0.00E+00	0.00E+00	-0.00E+00	0.00E+00	-0.00E+00	0.00E+00		0.00E+00	0.00E+00	-0.00E+00	0.00E+00	-0.00E+00	0.00E+00	0.00E+00
																										0.00E+00	0.00E+00	-0.00E+00	0.00E+00	-0.00E+00	0.00E+00		0.00E+00	0.00E+00	-0.00E+00	0.00E+00	-0.00E+00	0.00E+00	0.00E+00
																										0.00E+00	0.00E+00	-0.00E+00	0.00E+00	-0.00E+00	0.00E+00		0.00E+00	0.00E+00	-0.00E+00	0.00E+00	-0.00E+00	0.00E+00	0.00E+00
																										0.00E+00	0.00E+00	-0.00E+00	0.00E+00	-0.00E+00	0.00E+00		0.00E+00	0.00E+00	-0.00E+00	0.00E+00	-0.00E+00	0.00E+00	0.00E+00
																										0.00E+00	0.00E+00	-0.00E+00	0.00E+00	-0.00E+00	0.00E+00		0.00E+00	0.00E+00	-0.00E+00	0.00E+00	-0.00E+00	0.00E+00	0.00E+00
																										0.00E+00	0.00E+00	-0.00E+00	0.00E+00	-0.00E+00	0.00E+00		0.00E+00	0.00E+00	-0.00E+00	0.00E+00	-0.00E+00	0.00E+00	0.00E+00
																										0.00E+00	0.00E+00	-0.00E+00	0.00E+00	-0.00E+00	0.00E+00		0.00E+00	0.00E+00	-0.00E+00	0.00E+00	-0.00E+00	0.00E+00	0.00E+00
																										0.00E+00	0.00E+00	-0.00E+00	0.00E+00	-0.00E+00	0.00E+00		0.00E+00	0.00E+00	-0.00E+00	0.00E+00	-0.00E+00	0.00E+00	0.00E+00
																										0.00E+00	0.00E+00	-0.00E+00	0.00E+00	-0.00E+00	0.00E+00		0.00E+00	0.00E+00	-0.00E+00	0.00E+00	-0.00E+00	0.00E+00	0.00E+00
																										0.00E+00	0.00E+00	-0.00E+00	0.00E+00	-0.00E+00	0.00E+00		0.00E+00	0.00E+00	-0.00E+00	0.00E+00	-0.00E+00	0.00E+00	0.00E+00
																										0.00E+00	0.00E+00	-0.00E+00	0.00E+00	-0.00E+00	0.00E+00		0.00E+00	0.00E+00	-0.00E+00	0.00E+00	-0.00E+00	0.00E+00	0.00E+00
																										0.00E+00	0.00E+00	-0.00E+00	0.00E+00	-0.00E+00	0.00E+00		0.00E+00	0.00E+00	-0.00E+00	0.00E+00	-0.00E+00	0.00E+00	0.00E+00
																										0.00E+00	0.00E+00	-0.00E+00	0.00E+00	-0.00E+00	0.00E+00		0.00E+00	0.00E+00	-0.00E+00	0.00E+00	-0.00E+00	0.00E+00	0.00E+00
																										0.00E+00	0.00E+00	-0.00E+00	0.00E+00	-0.00E+00	0.00E+00		0.00E+00	0.00E+00	-0.00E+00	0.00E+00	-0.00E+00	0.00E+00	0.00E+00
																										0.00E+00	0.00E+00	-0.00E+00	0.00E+00	-0.00E+00	0.00E+00		0.00E+00	0.00E+00	-0.00E+00	0.00E+00	-0.00E+00	0.00E+00	0.00E+00
																										0.00E+00	0.00E+00	-0.00E+00	0.00E+00	-0.00E+00	0.00E+00		0.00E+00	0.00E+00	-0.00E+00	0.00E+00	-0.00E+00	0.00E+00	0.00E+00
																										0.00E+00	0.00E+00	-0.00E+00	0.00E+00	-0.00E+00	0.00E+00		0.00E+00	0.00E+00	-0.00E+00	0.00E+00	-0.00E+00	0.00E+00	0.00E+00
																										0.00E+00	0.00E+00	-0.00E+00	0.00E+00	-0.00E+00	0.00E+00		0.00E+00	0.00E+00	-0.00E+00	0.00E+00	-0.00E+00	0.00E+00	0.00E+00
																										0.00E+00	0.00E+00	-0.00E+00	0.00E+00	-0.00E+00	0.00E+00		0.00E+00	0.00E+00	-0.00E+00	0.00E+00	-0.00E+00	0.00E+00	0.00E+00
																										0.00E+00	0.00E+00	-0.00E+00	0.00E+00	-0.00E+00	0.00E+00		0.00E+00	0.00E+00	-0.00E+00	0.00E+00	-0.00E+00	0.00E+00	0.00E+00
																										0.00E+00	0.00E+00	-0.00E+00	0.00E+00	-0.00E+00	0.00E+00		0.00E+00	0.00E+00	-0.00E+00	0.00E+00	-0.00E+00	0.00E+00	0.00E+00
																										0.00E+00	0.00E+00	-0.00E+00	0.00E+00	-0.00E+00	0.00E+00		0.00E+00	0.00E+00	-0.00E+00	0.00E+00	-0.00E+00	0.00E+00	0.00E+00
																										0.00E+00	0.00E+00	-0.00E+00	0.00E+00	-0.00E+00	0.00E+00		0.00E+00	0.00E+00	-0.00E+00	0.00E+00	-0.00E+00	0.00E+00	0.00E+00
																										0.00E+00	0.00E+00	-0.00E+00	0.00E+00	-0.00E+00	0.00E+00		0.00E+00	0.00E+00	-0.00E+00	0.00E+00	-0.00E+00	0.00E+00	0.00E+00
																										0.00E+00	0.00E+00	-0.00E+00	0.00E+00	-0.00E+00	0.00E+00		0.00E+00	0.00E+00	-0.00E+00	0.00E+00	-0.00E+00	0.00E+00	0.00E+00
																										0.00E+00	0.00E+00	-0.00E+00	0.00E+00	-0.00E+00	0.00E+00		0.00E+00	0.00E+00	-0.00E+00	0.00E+00	-0.00E+00	0.00E+00	0.00E+00
																										0.00E+00	0.00E+00	-0.00E+00	0.00E+00	-0.00E+00	0.00E+00		0.00E+00	0.00E+00	-0.00E+00	0.00E+00	-0.00E+00	0.00E+00	0.00E+00
																										0.00E+00	0.00E+00	-0.00E+00	0.00E+00	-0.00E+00	0.00E+00		0.00E+00	0.00E+00	-0.00E+00	0.00E+00	-0.00E+00	0.00E+00	0.00E+00
																										0.00E+00	0.00E+00	-0.00E+00	0.00E+00	-0.00E+00	0.00E+00		0.00E+00	0.00E+00	-0.00E+00	0.00E+00	-0.00E+00	0.00E+00	0.00E+00
																										0.00E+00	0.00E+00	-0.00E+00	0.00E+00	-0.00E+00	0.00E+00		0.00E+00	0.00E+00	-0.00E+00	0.00E+00	-0.00E+00	0.00E+00	0.00E+00
																										0.00E+00	0.00E+00	-0.00E+00	0.00E+00	-0.00E+00	0.00E+00		0.00E+00	0.00E+00	-0.00E+00	0.00E+00	-0.00E+00	0.00E+00	0.00E+00
																										0.00E+00	0.00E+00	-0.00E+00	0.00E+00	-0.00E+00	0.00E+00		0.00E+00	0.00E+00	-0.00E+00	0.00E+00	-0.00E+00	0.00E+00	0.00E+00
																										0.00E+00	0.00E+00	-0.00E+00	0.00E+00	-0.00E+00	0.00E+00		0.00E+00	0.00E+00	-0.00E+00	0.00E+00	-0.00E+00	0.00E+00	0.00E+00
																										0.00E+00	0.00E+00	-0.00E+00	0.00E+00	-0.00E+00	0.00E+00		0.00E+00	0.00E+00	-0.00E+00	0.00E+00	-0.00E+00	0.00E+00	0.00E+00
																										0.00E+00	0.00E+00	-0.00E+00	0.00E+00	-0.00E+00	0.00E+00		0.00E+00	0.00E+00	-0.00E+00	0.00E+00	-0.00E+00	0.00E+00	0.00E+00
																										0.00E+00	0.00E+00	-0.00E+00	0.00E+00	-0.00E+00	0.00E+00		0.00E+00	0.00E+00	-0.00E+00	0.00E+00	-0.00E+00	0.00E+00	0.00E+00
																										0.00E+00	0.00E+00	-0.00E+00	0.00E+00	-0.00E+00	0.00E+00		0.00E+00	0.00E+00	-0.00E+00	0.00E+00	-0.00E+00	0.00E+00	0.00E+00
																										0.00E+00	0.00E+00	-0.00E+00	0.00E+00	-0.00E+00	0.00E+00		0.00E+00	0.00E+00	-0.00E+00	0.00E+00	-0.00E+00	0.00E+00	0.00E+00
																										0.00E+00	0.00E+00	-0.00E+00	0.00E+00	-0.00E+00	0.00E+00		0.00E+00	0.00E+00	-0.00E+00	0.00E+00	-0.00E+00	0.00E+00	0.00E+00
																										0.00E+00	0.00E+00	-0.00E+00	0.00E+00	-0.00E+00	0.00E+00		0.00E+00	0.00E+00	-0.00E+00	0.00E+00	-0.00E+00	0.00E+00	0.00E+00
																										0.00E+00	0.00E+00	-0.00E+00	0.00E+00	-0.00E+00	0.00E+00		0.00E+00	0.00E+00	-0.00E+00	0.00E+00	-0.00E+00	0.00E+00	0.00E+00
																										0.00E+00	0.00E+00	-0.00E+00	0.00E+00	-0.00E+00	0.00E+00		0.00E+00	0.00E+00	-0.00E+00	0.00E+00	-0.00E+00	0.00E+00	0.00E+00
																										0.00E+00	0.00E+00	-0.00E+00	0.00E+00	-0.00E+00	0.00E+00		0.00E+00	0.00E+00	-0.00E+00	0.00E+00	-0.00E+00	0.00E+00	0.00E+00
																										0.00E+00	0.00E+00	-0.00E+00	0.00E+00	-0.00E+00	0.00E+00		0.00E+00	0.00E+00	-0.00E+00	0.00E+00	-0.00E+00	0.00E+00	0.00E+00
																										0.00E+00	0.00E+00	-0.00E+00	0.00E+00	-0.00E+00	0.00E+00		0.00E+00	0.00E+00	-0.00E+00	0.00E+00	-0.00E+00	0.00E+00	0.00E+00
																										0.00E+00	0.00E+00	-0.00E+00	0.00E+00	-0.00E+00	0.00E+00		0.00E+00	0.00E+00	-0.00E+00	0.00E+00	-0.00E+00	0.00E+00	0.00E+00
																										0.00E+00	0.00E+00	-0.00E+00	0.00E+00	-0.00E+00	0.00E+00		0.00E+00	0.00E+00	-0.00E+00	0.00E+00	-0.00E+00	0.00E+00	0.00E+00
																										0.00E+00	0.00E+00	-0.00E+00	0.00E+00	-0.00E+00	0.00E+00		0.00E+00	0.00E+00	-0.00E+00	0.00E+00	-0.00E+00	0.00E+00	0.00E+00
																										0.00E+00	0.00E+00	-0.00E+00	0.00E+00	-0.00E+00	0.00E+00		0.00E+00	0.00E+00	-0.00E+00	0.00E+00	-0.00E+00	0.00E+00	0.00E+00
																										0.00E+00	0.00E+00	-0.00E+00	0.00E+00	-0.00E+00	0.00E+00		0.00E+00	0.00E+00	-0.00E+00	0.00E+00	-0.00E+00	0.00E+00	0.00E+00
																										0.00E+00	0.00E+00	-0.00E+00	0.00E+00	-0.00E+00	0.00E+00		0.00E+00	0.00E+00	-0.00E+00	0.00E+00	-0.00E+00	0.00E+00	0.00E+00
																										0.00E+00	0.00E+00	-0.00E+00	0.00E+00	-0.00E+00	0.00E+00		0.00E+00	0.00E+00	-0.00E+00	0.00E+00	-0.00E+00	0.00E+00	0.00E+00
																										0.00E+00	0.00E+00	-0.00E+00	0.00E+00	-0.00E+00	0.00E+00		0.00E+00	0.00E+00	-0.00E+00	0.00E+00	-0.00E+00	0.00E+00	0.00E+00
																										0.00E+00	0.00E+00	-0.00E+00	0.00E+00	-0.00E+00	0.00E+00		0.00E+00	0.00E+00	-0.00E+00	0.00E+00	-0.00E+00	0.00E+00	0.00E+00
																										0.00E+00	0.00E+00	-0.00E+00	0.00E+00	-0.00E+00	0.00E+00		0.00E+00	0.00E+00	-0.00E+00	0.00E+00	-0.00E+00	0.00E+00	0.00E+00
																										0.00E+00	0.00E+00	-0.00E+00	0.00E+00	-0.00E+00	0.00E+00		0.00E+00	0.00E+00	-0.00E+00	0.00E+00	-0.00E+00	0.00E+00	0.00E+00
																										0.00E+00	0.00E+00	-0.00E+00	0.00E+00	-0.00E+00	0.00E+00		0.00E+00	0.00E+00	-0.00E+00	0.00E+00	-0.00E+00	0.00E+00	0.00E+00
																										0.00E+00	0.00E+00	-0.00E+00	0.00E+00	-0.00E+00	0.00E+00		0.00E+00	0.00E+00	-0.00E+00	0.00E+00	-0.00E+00	0.00E+00	0.00E+00
																										0.00E+00	0.00E+00	-0.00E+00	0.00E+00	-0.00E+00	0.00E+00		0.00E+00	0.00E+00	-0.00E+00	0.00E+00	-0.00E+00	0.00E+00	0.00E+00
																										0.00E+00	0.00E+00	-0.00E+00	0.00E+00	-0.00E+00	0.00E+00		0.00E+00	0.00E+00	-0.00E+00	0.00E+00	-0.00E+00	0.00E+00	0.00E+00
																										0.00E+00	0.00E+00	-0.00E+00	0.00E+00	-0.00E+00	0.00E+00		0.00E+00	0.00E+00	-0.00E+00	0.00E+00	-0.00E+00	0.00E+00	0.00E+00
																										0.00E+00	0.00E+00	-0.00E+00	0.00E+00	-0.00E+00	0.00E+00		0.00E+00	0.00E+00	-0.00E+00	0.00E+00	-0.00E+00	0.00E+00	0.00E+00
																										0.00E+00	0.00E+00	-0.00E+00	0.00E+00	-0.00E+00	0.00E+00		0.00E+00	0.00E+00	-0.00E+00	0.00E+00	-0.00E+00	0.00E+00	0.00E+00
																										0.00E+00	0.00E+00	-0.00E+00	0.00E+00	-0.00E+00	0.00E+00		0.00E+00	0.00E+00	-0.00E+00	0.00E+00	-0.00E+00	0.00E+00	0.00E+00
																										0.00E+00	0.00E+00	-0.00E+00	0.00E+00	-0.00E+00	0.00E+00		0.00E+00	0.00E+00	-0.00E+00	0.00E+00	-0.00E+00	0.00E+00	0.00E+00
																										0.00E+00	0.00E+00	-0.00E+00	0.00E+00	-0.00E+00	0.00E+00		0.00E+00	0.00E+00	-0.00E+00	0.00E+00	-0.00E+00	0.00E+00	0.00E+00
																										0.00E+00	0.00E+00	-0.00E+00	0.00E+00	-0.00E+00	0.00E+00		0.00E+00	0.00E+00	-0.00E+00	0.00E+00	-0.00E+00	0.00E+00	0.00E+00
																										0.00E+00	0.00E+00	-0.00E+00	0.00E+00	-0.00E+00	0.00E+00		0.00E+00	0.00E+00	-0.00E+00	0.00E+00	-0.00E+00	0.00E+00	0.00E+00
																										0.00E+00	0.00E+00	-0.00E+00	0.00E+00	-0.00E+00	0.00E+00		0.00E+00	0.00E+00	-0.00E+00	0.00E+00	-0.00E+00	0.00E+00	0.00E+00
																										0.00E+00	0.00E+00	-0.00E+00	0.00E+00	-0.00E+00	0.00E+00		0.00E+00	0.00E+00	-0.00E+00	0.00E+00	-0.00E+00	0.00E+00	0.00E+00
																										0.00E+00	0.00E+00	-0.00E+00	0.00E+00	-0.00E+00	0.00E+00		0.00E+00	0.00E+00	-0.00E+00	0.00E+00	-0.00E+00	0.00E+00	0.00E+00
																										0.00E+00	0.00E+00	-0.00E+00	0.00E+00	-0.00E+00	0.00E+00		0.00E+00	0.00E+00	-0.00E+00	0.00E+00	-0.00E+00	0.00E+00	0.00E+00
																										0.00E+00	0.00E+00	-0.00E+00	0.00E+00	-0.00E+00	0.00E+00		0.00E+00	0.00E+00	-0.00E+00	0.00E+00	-0.00E+00	0.00E+00	0.00E+00
																										0.00E+00	0.00E+00	-0.00E+00	0.00E+00	-0.00E+00	0.00E+00		0.00E+00	0.00E+00	-0.00E+00	0.00E+00	-0.00E+00	0.00E+00	0.00E+00
																										0.00E+00	0.00E+00	-0.00E+00	0.00E+00	-0.00E+00	0.00E+00		0.00E+00	0.00E+00	-0.00E+00	0.00E+00	-0.00E+00	0.00E+00	0.00E+00
																										0.00E+00	0.00E+00	-0.00E+00	0.00E+00	-0.00E+00	0.00E+00		0.00E+00	0.00E+00	-0.00E+00	0.00E+00	-0.00E+00	0.00E+00	0.00E+00
																										0.00E+00	0.00E+00	-0.00E+00	0.00E+00	-0.00E+00	0.00E+00		0.00E+00	0.00E+00	-0.00E+00	0.00E+00	-0.00E+00	0.00E+00	0.00E+00
																										0.00E+00	0.00E+00	-0.00E+00	0.00E+00	-0.00E+00	0.00E+00		0.00E+00	0.00E+00	-0.00E+00	0.00E+00	-0.00E+00	0.00E+00	0.00E+00
																										0.00E+00	0.00E+00	-0.00E+00	0.00E+00	-0.00E+00	0.00E+00		0.00E+00	0.00E+00	-0.00E+00	0.00E+00	-0.00E+00	0.00E+00	0.00E+00
																										0.00E+00	0.00E+00	-0.00E+00	0.00E+00	-0.00E+00	0.00E+00		0.00E+00	0.00E+00	-0.00E+00	0.00E+00	-0.00E+00	0.00E+00	0.00E+00
																										0.00E+00	0.00E+00	-0.00E+00	0.00E+00	-0.00E+00	0.00E+00		0.00E+00	0.00E+00	-0.00E+00	0.00E+00	-0.00E+00	0.00E+00	0.00E+00
																										0.00E+00	0.00E+00	-0.00E+00	0.00E+00	-0.00E+00	0.00E+00		0.00E+00	0.00E+00	-0.00E+00	0.00E+00	-0.00E+00	0.00E+00	0.00E+00
																										0.00E+00	0.00E+00	-0.00E+00	0.00E+00	-0.00E+00	0.00E+00		0.00E+00	0.00E+00	-0.00E+00	0.00E+00	-0.00E+00	0.00E+00	0.00E+00
																										0.00E+00	0.00E+00	-0.00E+00	0.00E+00	-0.00E+00	0.00E+00		0.00E+00	0.00E+00	-0.00E+00	0.00E+00	-0.00E+00	0.00E+00	0.00E+00
																										0.00E+00	0.00E+00	-0.00E+00	0.00E+00	-0.00E+00	0.00E+00		0.00E+00	0.00E+00	-0.00E+00	0.00E+00	-0.00E+00	0.00E+00	0.00E+00
																										0.00E+00	0.00E+00	-0.00E+00	0.00E+00	-0.00E+00	0.00E+00		0.00E+00	0.00E+00	-0.00E+00	0.00E+00	-0.00E+00	0.00E+00	0.00E+00
																										0.00E+00	0.00E+00	-0.00E+00	0.00E+00	-0.00E+00	0.00E+00		0.00E+00	0.00E+00	-0.00E+00	0.00E+00	-0.00E+00	0.00E+00	0.00E+00
																										0.00E+00	0.00E+00	-0.00E+00	0.00E+00	-0.00E+00	0.00E+00		0.00E+00	0.00E+00	-0.00E+00	0.00E+00	-0.00E+00	0.00E+00	0.00E+00
																										0.00E+00	0.00E+00	-0.00E+00	0.00E+00	-0.00E+00	0.00E+00		0.00E+00	0.00E+00	-0.00E+00	0.00E+00	-0.00E+00	0.00E+00	0.00E+00
																										0.00E+00	0.00E+00	-0.00E+00	0.00E+00	-0.00E+00	0.00E+00		0.00E+00	0.00E+00	-0.00E+00	0.00E+00	-0.00E+00	0.00E+00	0.00E+00
																										0.00E+00	0.00E+00	-0.00E+00	0.00E+00	-0.00E+00	0.00E+00		0.00E+00	0.00E+00	-0.00E+00	0.00E+00	-0.00E+00	0.00E+00	0.00E+00
																										0.00E+00	0.00E+00	-0.00E+00	0.00E+00	-0.00E+00	0.00E+00		0.00E+00	0.00E+00	-0.00E+00	0.00E+00	-0.00E+00	0.00E+00	0.00E+00
																										0.00E+00	0.00E+00	-0.00E+00	0.00E+00	-0.00E+00	0.00E+00		0.00E+00	0.00E+00	-0.00E+00	0.00E+00	-0.00E+00	0.00E+00	0.00E+00
																										0.00E+00	0.00E+00	-0.00E+00	0.00E+00	-0.00E+00	0.00E+00		0.00E+00	0.00E+00	-0.00E+00	0.00E+00	-0.00E+00	0.00E+00	0.00E+00
																										0.00E+00	0.00E+00	-0.00E+00	0.00E+00	-0.00E+00	0.00E+00		0.00E+00	0.00E+00	-0.00E+00	0.00E+00	-0.00E+00	0.00E+00	0.00E+00
																										0.00E+00	0.00E+00	-0.00E+00	0.00E+00	-0.00E+00	0.00E+00		0.00E+00	0.00E+00	-0.00E+00	0.00E+00	-0.00E+00	0.00E+00	0.00E+00
																										0.00E+00	0.00E+00	-0.00E+00	0.00E+00	-0.00E+00	0.00E+00		0.00E+00	0.00E+00	-0.00E+00	0.00E+00	-0.00E+00	0.00E+00	0.00E+00
																										0.00E+00	0.00E+00	-0.00E+00	0.00E+00	-0.00E+00	0.00E+00		0.00E+00	0.00E+00	-0.00E+00	0.00E+00	-0.00E+00	0.00E+00	0.00E+00
																										0.00E+00	0.00E+00	-0.00E+00	0.00E+00	-0.00E+00	0.00E+00		0.00E+00	0.00E+00	-0.00E+00	0.00E+00	-0.00E+00	0.00E+00	0.00E+00
																										0.00E+00	0.00E+00	-0.00E+00	0.00E+00	-0.00E+00	0.00E+00		0.00E+00	0.00E+00	-0.00E+00	0.00E+00	-0.00E+00	0.00E+00	0.00E+00
																										0.00E+00	0.00E+00	-0.00E+00	0.00E+00	-0.00E+00	0.00E+00		0.00E+00	0.00E+00	-0.00E+00	0.00E+00	-0.00E+00	0.00E+00	0.00E+00
																										0.00E+00	0.00E+00	-0.00E+00	0.00E+00	-0.00E+00	0.00E+00		0.00E+00	0.00E+00	-0.00E+00	0.00E+00	-0.00E+00	0.00E+00	0.00E+00
																										0.00E+00	0.00E+00	-0.00E+00	0.00E+00	-0.00E+00	0.00E+00		0.00E+00	0.00E+00	-0.00E+00	0.00E+00	-0.00E+00	0.00E+00	0.00E+00
																										0.00E+00	0.00E+00	-0.00E+00	0.00E+00	-0.00E+00	0.00E+00		0.00E+00	0.00E+00	-0.00E+00	0.00E+00	-0.00E+00	0.00E+00	0.00E+00
																										0.00E+00	0.00E+00	-0.00E+00	0.00E+00	-0.00E+00	0.00E+00		0.00E+00	0.00E+00	-0.00E+00	0.00E+00	-0.00E+00	0.00E+00	0.00E+00
																										0.00E+00	0.00E+00	-0.00E+00	0.00E+00	-0.00E+00	0.00E+00		0.00E+00	0.00E+00	-0.00E+00	0.00E+00	-0.00E+00	0.00E+00	0.00E+00
																										0.00E+00	0.00E+00	-0.00E+00	0.00E+00	-0.00E+00	0.00E+00		0.00E+00	0.00E+00	-0.00E+00	0.00E+00	-0.00E+00	0.00E+00	0.00E+00
																										0.00E+00	0.00E+00	-0.00E+00	0.00E+00	-0.00E+00	0.00E+00		0.00E+00	0.00E+00	-0.00E+00	0.00E+00	-0.00E+00	0.00E+00	0.00E+00
																										0.00E+00	0.00E+00	-0.00E+00	0.00E+00	-0.00E+00	0.00E+00		0.00E+00	0.00E+00	-0.00E+00	0.00E+00	-0.00E+00	0.00E+00	0.00E+00
																										0.00E+00	0.00E+00	-0.00E+00	0.00E+00	-0.00E+00	0.00E+00		0.00E+00	0.00E+00	-0.00E+00	0.00E+00	-0.00E+00	0.00E+00	0.00E+00
																										0.00E+00	0.00E+00	-0.00E+00	0.00E+00	-0.00E+00	0.00E+00		0.00E+00	0.00E+00	-0.00E+00	0.00E+00	-0.00E+00	0.00E+00	0.00E+00
																										0.00E+00	0.00E+00	-0.00E+00	0.00E+00	-0.00E+00	0.00E+00		0.00E+00	0.00E+00	-0.00E+00	0.00E+00	-0.00E+00	0.00E+00	0.00E+00
																										0.00E+00	0.00E+00	-0.00E+00	0.00E+00	-0.00E+00	0.00E+00		0.00E+00	0.00E+00	-0.00E+00	0.00E+00	-0.00E+00	0.00E+00	0.00E+00
																										0.00E+00	0.00E+00	-0.00E+00	0.00E+00	-0.00E+00	0.00E+00		0.00E+00	0.00E+00	-0.00E+00	0.00E+00	-0.00E+00	0.00E+00	0.00E+00
																										0.00E+00	0.00E+00	-0.00E+00	0.00E+00	-0.00E+00	0.00E+00		0.00E+00	0.00E+00	-0.00E+00	0.00E+00	-0.00E+00	0.00E+00	0.00E+00
																										0.00E+00	0.00E+00	-0.00E+00	0.00E+00	-0.00E+00	0.00E+00		0.00E+00	0.00E+00	-0.00E+00	0.00E+00	-0.00E+00	0.00E+00	0.00E+00
																										0.00E+00	0.00E+00	-0.00E+00	0.00E+00	-0.00E+00	0.00E+00		0.00E+00	0.00E+00	-0.00E+00	0.00E+00	-0.00E+00	0.00E+00	0.00E+00
																										0.00E+00	0.00E+00	-0.00E+00	0.00E+00	-0.00E+00	0.00E+00		0.00E+00	0.00E+00	-0.00E+00	0.00E+00	-0.00E+00	0.00E+00	0.00E+00
																										0.00E+00	0.00E+00	-0.00E+00	0.00E+00	-0.00E+00	0.00E+00		0.00E+00	0.00E+00	-0.00E+00	0.00E+00	-0.00E+00	0.00E+00	0.00E+00
																										0.00E+00	0.00E+00	-0.00E+00	0.00E+00	-0.00E+00	0.00E+00		0.00E+00	0.00E+00	-0.00E+00	0.00E+00	-0.00E+00	0.00E+00	0.00E+00
																										0.00E+00	0.00E+00	-0.00E+00	0.00E+00	-0.00E+00	0.00E+00		0.00E+00	0.00E+00	-0.00E+00	0.00E+00	-0.00E+00	0.00E+00	0.00E+00
																										0.00E+00	0.00E+00	-0.00E+00	0.00E+00	-0.00E+00	0.00E+00		0.00E+00	0.00E+00	-0.00E+00	0.00E+00	-0.00E+00	0.00E+00	0.00E+00
																										0.00E+00	0.00E+00	-0.00E+00	0.00E+00	-0.00E+00	0.00E+00		0.00E+00	0.00E+00	-0.00E+00	0.00E+00	-0.00E+00	0.00E+00	0.00E+00
																										0.00E+00	0.00E+00	-0.00E+00	0.00E+00	-0.00E+00	0.00E+00		0.00E+00	0.00E+00	-0.00E+00	0.00E+00	-0.00E+00	0.00E+00	0.00E+00
																										0.00E+00	0.00E+00	-0.00E+00	0.00E+00	-0.00E+00	0.00E+00		0.00E+00	0.00E+00	-0.00E+00	0.00E+00	-0.00E+00	0.00E+00	0.00E+00
																										0.00E+00	0.00E+00	-0.00E+00	0.00E+00	-0.00E+00	0.00E+00		0.00E+00	0.00E+00	-0.00E+00	0.00E+00	-0.00E+00	0.00E+00	0.00E+00
																										0.00E+00	0.00E+00	-0.00E+00	0.00E+00	-0.00E+00	0.00E+00		0.00E+00	0.00E+00	-0.00E+00	0.00E+00	-0.00E+00	0.00E+00	0.00E+00
																										0.00E+00	0.00E+00	-0.00E+00	0.00E+00	-0.00E+00	0.00E+00		0.00E+00	0.00E+00	-0.00E+00	0.00E+00	-0.00E+00	0.00E+00	0.00E+00
																										0.00E+00	0.00E+00	-0.00E+00	0.00E+00	-0.00E+00	0.00E+00		0.00E+00	0.00E+00	-0.00E+00	0.00E+00	-0.00E+00	0.00E+00	0.00E+00
																										0.00E+00	0.00E+00	-0.00E+00	0.00E+00	-0.00E+00	0.00E+00		0.00E+00	0.00E+00	-0.00E+00	0.00E+00	-0.00E+00	0.00E+00	0.00E+00
																										0.00E+00	0.00E+00	-0.00E+00	0.00E+00	-0.00E+00	0.00E+00		0.00E+00	0.00E+00	-0.00E+00	0.00E+00	-0.00E+00	0.00E+00	0.00E+00
																										0.00E+00	0.00E+00	-0.00E+00	0.00E+00	-0.00E+00	0.00E+00		0.00E+00	0.00E+00	-0.00E+00	0.00E+00	-0.00E+00	0.00E+00	0.00E+00
																										0.00E+00	0.00E+00	-0.00E+00	0.00E+00	-0.00E+00	0.00E+00		0.00E+00	0.00E+00	-0.00E+00	0.00E+00	-0.00E+00	0.00E+00	0.00E+00
																										0.00E+00	0.00E+00	-0.00E+00	0.00E+00	-0.00E+00	0.00E+00		0.00E+00	0.00E+00	-0.00E+00	0.00E+00	-0.00E+00	0.00E+00	0.00E+00
																										0.00E+00	0.00E+00	-0.00E+00	0.00E+00	-0.00E+00	0.00E+00		0.00E+00	0.00E+00	-0.00E+00	0.00E+00	-0.00E+00	0.00E+00	0.00E+00
																										0.00E+00	0.00E+00	-0.00E+00	0.00E+00	-0.00E+00	0.00E+00		0.00E+00	0.00E+00	-0.00E+00	0.00E+00	-0.00E+00	0.00E+00	0.00E+00
																										0.00E+00	0.00E+00	-0.00E+00	0.00E+00	-0.00E+00	0.00E+00		0.00E+00	0.00E+00	-0.00E+00	0.00E+00	-0.00E+00	0.00E+00	0.00E+00
																										0.00E+00	0.00E+00	-0.00E+00	0.00E+00	-0.00E+00	0.00E+00		0.00E+00	0.00E+00	-0.00E+00	0.00E+00	-0.00E+00	0.00E+00	0.00E+00
																										0.00E+00	0.00E+00	-0.00E+00	0.00E+00	-0.00E+00	0.00E+00		0.00E+00	0.00E+00	-0.00E+00	0.00E+00	-0.00E+00	0.00E+00	0.00E+00
																										0.00E+00	0.00E+00	-0.00E+00	0.00E+00	-0.00E+00	0.00E+00		0.00E+00	0.00E+00	-0.00E+00	0.00E+00	-0.00E+00	0.00E+00	0.00E+00
																										0.00E+00	0.00E+00	-0.00E+00	0.00E+00	-0.00E+00	0.00E+00		0.00E+00	0.00E+00	-0.00E+00	0.00E+00	-0.00E+00	0.00E+00	0.00E+00
																										0.00E+00	0.00E+00	-0.00E+00	0.00E+00	-0.00E+00	0.00E+00		0.00E+00	0.00E+00	-0.00E+00	0.00E+00	-0.00E+00	0.00E+00	0.00E+00
																										0.00E+00	0.00E+00	-0.00E+00	0.00E+00	-0.00E+00	0.00E+00		0.00E+00	0.00E+00	-0.00E+00	0.00E+00	-0.00E+00	0.00E+00	0.00E+00
																										0.00E+00	0.00E+00	-0.00E+00	0.00E+00	-0.00E+00	0.00E+00		0.00E+00	0.00E+00	-0.00E+00	0.00E+00	-0.00E+00	0.00E+00	0.00E+00
																										0.00E+00	0.00E+00	-0.00E+00	0.00E+00	-0.00E+00	0.00E+00		0.00E+00	0.00E+00	-0.00E+00	0.00E+00	-0.00E+00	0.00E+00	0.00E+00
																										0.00E+00	0.00E+00	-0.00E+00	0.00E+00	-0.00E+00	0.00E+00		0.00E+00	0.00E+00	-0.00E+00	0.00E+00	-0.00E+00	0.00E+00	0.00E+00
																										0.00E+00	0.00E+00	-0.00E+00	0.00E+00	-0.00E+00	0.00E+00		0.00E+00	0.00E+00	-0.00E+00	0.00E+00	-0.00E+00	0.00E+00	0.00E+00
																										0.00E+00	0.00E+00	-0.00E+00	0.00E+00	-0.00E+00	0.00E+00		0.00E+00	0.00E+00	-0.00E+00	0.00E+00	-0.00E+00	0.00E+00	0.00E+00
																										0.00E+00	0.00E+00	-0.00E+00	0.00E+00	-0.00E+00	0.00E+00		0.00E+00	0.00E+00	-0.00E+00	0.00E+00	-0.00E+00	0.00E+00	0.00E+00
																										0.00E+00	0.00E+00	-0.00E+00	0.00E+00	-0.00E+00	0.00E+00		0.00E+00	0.00E+00	-0.00E+00	0.00E+00	-0.00E+00	0.00E+00	0.00E+00
																										0.00E+00	0.00E+00	-0.00E+00	0.00E+00	-0.00E+00	0.00E+00		0.00E+00	0.00E+00	-0.00E+00	0.00E+00	-0.00E+00	0.00E+00	0.00E+00
																										0.00E+00	0.00E+00	-0.00E+00	0.00E+00	-0.00E+00	0.00E+00		0.00E+00	0.00E+00	-0.00E+00	0.00E+00	-0.00E+00	0.00E+00	0.00E+00
																										0.00E+00	0.00E+00	-0.00E+00	0.00E+00	-0.00E+00	0.00E+00		0.00E+00	0.00E+00	-0.00E+00	0.00E+00	-0.00E+00	0.00E+00	0.00E+00
																										0.00E+00	0.00E+00	-0.00E+00	0.00E+00	-0.00E+00	0.00E+00		0.00E+00	0.00E+00	-0.00E+00	0.00E+00	-0.00E+00	0.00E+00	0.00E+00
																										0.00E+00	0.00E+00	-0.00E+00	0.00E+00	-0.00E+00	0.00E+00		0.00E+00	0.00E+00	-0.00E+00	0.00E+00	-0.00E+00	0.00E+00	0.00E+00
																										0.00E+00	0.00E+00	-0.00E+00	0.00E+00	-0.00E+00	0.00E+00		0.00E+00	0.00E+00	-0.00E+00	0.00E+00	-0.00E+00	0.00E+00	0.00E+00
																										0.00E+00	0.00E+00	-0.00E+00	0.00E+00	-0.00E+00	0.00E+00		0.00E+00	0.00E+00	-0.00E+00	0.00E+00	-0.00E+00	0.00E+00	0.00E+00
																										0.00E+00	0.00E+00	-0.00E+00	0.00E+00	-0.00E+00	0.00E+00		0.00E+00	0.00E+00	-0.00E+00	0.00E+00	-0.00E+00	0.00E+00	0.00E+00
																										0.00E+00	0.00E+00	-0.00E+00	0.00E+00	-0.00E+00	0.00E+00		0.00E+00	0.00E+00	-0.00E+00	0.00E+00	-0.00E+00	0.00E+00	0.00E+00
																										0.00E+00	0.00E+00	-0.00E+00	0.00E+00	-0.00E+00	0.00E+00		0.00E+00	0.00E+00	-0.00E+00	0.00E+00	-0.00E+00	0.00E+00	0.00E+00
																										0.00E+00	0.00E+00	-0.00E+00	0.00E+00	-0.00E+00	0.00E+00		0.00E+00	0.00E+00	-0.00E+00	0.00E+00	-0.00E+00	0.00E+00	0.00E+00
																										0.00E+00	0.00E+00	-0.00E+00	0.00E+00	-0.00E+00	0.00E+00		0.00E+00	0.00E+00	-0.00E+00	0.00E+00	-0.00E+00	0.00E+00	0.00E+00
																										0.00E+00	0.00E+00	-0.00E+00	0.00E+00	-0.00E+00	0.00E+00		0.00E+00	0.00E+00	-0.00E+00	0.00E+00	-0.00E+00	0.00E+00	0.00E+00
																										0.00E+00	0.00E+00	-0.00E+00	0.00E+00	-0.00E+00	0.00E+00		0.00E+00	0.00E+00	-0.00E+00	0.00E+00	-0.00E+00	0.00E+00	0.00E+00
																										0.00E+00	0.00E+00	-0.00E+00	0.00E+00	-0.00E+00	0.00E+00		0.00E+00	0.00E+00	-0.00E+00	0.00E+00	-0.00E+00	0.00E+00	0.00E+00
																										0.00E+00	0.00E+00	-0.00E+00	0.00E+00	-0.00E+00	0.00E+00		0.00E+00	0.00E+00	-0.00E+00	0.00E+00	-0.00E+00	0.00E+00	0.00E+00
																										0.00E+00	0.00E+00	-0.00E+00	0.00E+00	-0.00E+00	0.00E+00		0.00E+00	0.00E+00	-0.00E+00	0.00E+00	-0.00E+00	0.00E+00	0.00E+00
																										0.00E+00	0.00E+00	-0.00E+00	0.00E+00	-0.00E+00	0.00E+00		0.00E+00	0.00E+00	-0.00E+00	0.00E+00	-0.00E+00	0.00E+00	0.00E+00
																										0.00E+00	0.00E+00	-0.00E+00	0.00E+00	-0.00E+00	0.00E+00		0.00E+00	0.00E+00	-0.00E+00	0.00E+00	-0.00E+00	0.00E+00	0.00E+00
																										0.00E+00	0.00E+00	-0.00E+00	0.00E+00	-0.00E+00	0.00E+00		0.00E+00	0.00E+00	-0.00E+00	0.00E+00	-0.00E+00	0.00E+00	0.00E+00
																										0.00E+00	0.00E+00	-0.00E+00	0.00E+00	-0.00E+00	0.00E+00		0.00E+00	0.00E+00	-0.00E+00	0.00E+00	-0.00E+00	0.00E+00	0.00E+00
																										0.00E+00	0.00E+00	-0.00E+00	0.00E+00	-0.00E+00	0.00E+00		0.00E+00	0.00E+00	-0.00E+00	0.00E+00	-0.00E+00	0.00E+00	0.00E+00
																										0.00E+00	0.00E+00	-0.00E+00	0.00E+00	-0.00E+00	0.00E+00		0.00E+00	0.00E+00	-0.00E+00	0.00E+00	-0.00E+00	0.00E+00	0.00E+00
																										0.00E+00	0.00E+00	-0.00E+00	0.00E+00	-0.00E+00	0.00E+00		0.00E+00	0.00E+00	-0.00E+00	0.00E+00	-0.00E+00	0.00E+00	0.00E+00
																										0.00E+00	0.00E+00	-0.00E+00	0.00E+00	-0.00E+00	0.00E+00		0.00E+00	0.00E+00	-0.00E+00	0.00E+00	-0.00E+00	0.00E+00	0.00E+00
																										0.00E+00	0.00E+00	-0.00E+00	0.00E+00	-0.00E+00	0.00E+00		0.00E+00	0.00E+00	-0.00E+00	0.00E+00	-0.00E+00	0.00E+00	0.00E+00
																										0.00E+00	0.00E+00	-0.00E+00	0.00E+00	-0.00E+00	0.00E+00		0.00E+00	0.00E+00	-0.00E+00	0.00E+00	-0.00E+00	0.00E+00	0.00E+00
																										0.00E+00	0.00E+00	-0.00E+00	0.00E+00	-0.00E+00	0.00E+00		0.00E+00	0.00E+00	-0.00E+00	0.00E+00	-0.00E+00	0.00E+00	0.00E+00
																										0.00E+00	0.00E+00	-0.00E+00	0.00E+00	-0.00E+00	0.00E+00		0.00E+00	0.00E+00	-0.00E+00	0.00E+00	-0.00E+00	0.00E+00	0.00E+00
																										0.00E+00	0.00E+00	-0.00E+00	0.00E+00	-0.00E+00	0.00E+00		0.00E+00	0.00E+00	-0.00E+00	0.00E+00	-0.00E+00	0.00E+00	0.00E+00
																										0.00E+00	0.00E+00	-0.00E+00	0.00E+00	-0.00E+00	0.00E+00		0.00E+00	0.00E+00	-0.00E+00	0.00E+00	-0.00E+00	0.00E+00	0.00E+00
																										0.00E+00	0.00E+00	-0.00E+00	0.00E+00	-0.00E+00	0.00E+00		0.00E+00	0.00E+00	-0.00E+00	0.00E+00	-0.00E+00	0.00E+00	0.00E+00
																										0.00E+00	0.00E+00	-0.00E+00	0.00E+00	-0.00E+00	0.00E+00		0.00E+00	0.00E+00	-0.00E+00	0.00E+00	-0.00E+00	0.00E+00	0.00E+00
																										0.00E+00	0.00E+00	-0.00E+00	0.00E+00	-0.00E+00	0.00E+00		0.00E+00	0.00E+00	-0.00E+00	0.00E+00	-0.00E+00	0.00E+00	0.00E+00
																										0.00E+00	0.00E+00	-0.00E+00	0.00E+00	-0.00E+00	0.00E+00		0.00E+00	0.00E+00	-0.00E+00	0.00E+00	-0.00E+00	0.00E+00	0.00E+00
																										0.00E+00	0.00E+00	-0.00E+00	0.00E+00	-0.00E+00	0.00E+00		0.00E+00	0.00E+00	-0.00E+00	0.00E+00	-0.00E+00	0.00E+00	0.00E+00
																										0.00E+00	0.00E+00	-0.00E+00	0.00E+00	-0.00E+00	0.00E+00		0.00E+00	0.00E+00	-0.00E+00	0.00E+00	-0.00E+00	0.00E+00	0.00E+00
																										0.00E+00	0.00E+00	-0.00E+00	0.00E+00	-0.00E+00	0.00E+00		0.00E+00	0.00E+00	-0.00E+00	0.00E+00	-0.00E+00	0.00E+00	0.00E+00
																										0.00E+00	0.00E+00	-0.00E+00	0.00E+00	-0.00E+00	0.00E+00		0.00E+00	0.00E+00	-0.00E+00	0.00E+00	-0.00E+00	0.00E+00	0.00E+00
																										0.00E+00	0.00E+00	-0.00E+00	0.00E+00	-0.00E+00	0.00E+00		0.00E+00	0.00E+00	-0.00E+00	0.00E+00	-0.00E+00	0.00E+00	0.00E+00
																										0.00E+00	0.00E+00	-0.00E+00	0.00E+00	-0.00E+00	0.00E+00		0.00E+00	0.00E+00	-0.00E+00	0.00E+00	-0.00E+00	0.00E+00	0.00E+00
																										0.00E+00	0.00E+00	-0.00E+00	0.00E+00	-0.00E+00	0.00E+00		0.00E+00	0.00E+00	-0.00E+00	0.00E+00	-0.00E+00	0.00E+00	0.00E+00
																										0.00E+00	0.00E+00	-0.00E+00	0.00E+00	-0.00E+00	0.00E+00		0.00E+00	0.00E+00	-0.00E+00	0.00E+00	-0.00E+00	0.00E+00	0.00E+00
																										0.00E+00	0.00E+00	-0.00E+00	0.00E+00	-0.00E+00	0.00E+00		0.00E+00	0.00E+00	-0.00E+00	0.00E+00	-0.00E+00	0.00E+00	0.00E+00
																										0.00E+00	0.00E+00	-0.00E+00	0.00E+00	-0.00E+00	0.00E+00		0.00E+00	0.00E+00	-0.00E+00	0.00E+00	-0.00E+00	0.00E+00	0.00E+00
																										0.00E+00	0.00E+00	-0.00E+00	0.00E+00	-0.00E+00	0.00E+00		0.00E+00	0.00E+00	-0.00E+00	0.00E+00	-0.00E+00	0.00E+00	0.00E+00
																										0.00E+00	0.00E+00	-0.00E+00	0.00E+00	-0.00E+00	0.00E+00		0.00E+00	0.00E+00	-0.00E+00	0.00E+00	-0.00E+00	0.00E+00	0.00E+00
																										0.00E+00	0.00E+00	-0.00E+00	0.00E+00	-0.00E+00	0.00E+00		0.00E+00	0.00E+00	-0.00E+00	0.00E+00	-0.00E+00	0.00E+00	0.00E+00
																										0.00E+00	0.00E+00	-0.00E+00	0.00E+00	-0.00E+00	0.00E+00		0.00E+00	0.00E+00	-0.00E+00	0.00E+00	-0.00E+00	0.00E+00	0.00E+00
																										0.00E+00	0.00E+00	-0.00E+00	0.00E+00	-0.00E+00	0.00E+00		0.00E+00	0.00E+00	-0.00E+00	0.00E+00	-0.00E+00	0.00E+00	0.00E+00
																										0.00E+00	0.00E+00	-0.00E+00	0.00E+00	-0.00E+00	0.00E+00		0.00E+00	0.00E+00	-0.00E+00	0.00E+00	-0.00E+00	0.00E+00	0.00E+00
																										0.00E+00	0.00E+00	-0.00E+00	0.00E+00	-0.00E+00	0.00E+00		0.00E+00	0.00E+00	-0.00E+00	0.00E+00	-0.00E+00	0.00E+00	0.00E+00
																										0.00E+00	0.00E+00	-0.00E+00	0.00E+00	-0.00E+00	0.00E+00		0.00E+00	0.00E+00	-0.00E+00	0.00E+00	-0.00E+00	0.00E+00	0.00E+00
																										0.00E+00	0.00E+00	-0.00E+00	0.00E+00	-0.00E+00	0.00E+00		0.00E+00	0.00E+00	-0.00E+00	0.00E+00	-0.00E+00	0.00E+00	0.00E+00
																										0.00E+00	0.00E+00	-0.00E+00	0.00E+00	-0.00E+00	0.00E+00		0.00E+00	0.00E+00	-0.00E+00	0.00E+00	-0.00E+00	0.00E+00	0.00E+00
																										0.00E+00	0.00E+00	-0.00E+00	0.00E+00	-0.00E+00	0.00E+00		0.00E+00	0.00E+00	-0.00E+00	0.00E+00	-0.00E+00	0.00E+00	0.00E+00
																										0.00E+00	0.00E+00	-0.00E+00	0.00E+00	-0.00E+00	0.00E+00		0.00E+00	0.00E+00	-0.00E+00	0.00E+00	-0.00E+00	0.00E+00	0.00E+00
																										0.00E+00	0.00E+00	-0.00E+00	0.00E+00	-0.00E+00	0.00E+00		0.00E+00	0.00E+00	-0.00E+00	0.00E+00	-0.00E+00	0.00E+00	0.00E+00
																										0.00E+00	0.00E+00	-0.00E+00	0.00E+00	-0.00E+00	0.00E+00		0.00E+00	0.00E+00	-0.00E+00	0.00E+00	-0.00E+00	0.00E+00	0.00E+00
																										0.00E+00	0.00E+00	-0.00E+00	0.00E+00	-0.00E+00	0.00E+00		0.00E+00	0.00E+00	-0.00E+00	0.00E+00	-0.00E+00	0.00E+00	0.00E+00
																										0.00E+00	0.00E+00	-0.00E+00	0.00E+00	-0.00E+00	0.00E+00		0.00E+00	0.00E+00	-0.00E+00	0.00E+00	-0.00E+00	0.00E+00	0.00E+00
																										0.00E+00	0.00E+00	-0.00E+00	0.00E+00	-0.00E+00	0.00E+00		0.00E+00	0.00E+00	-0.00E+00	0.00E+00	-0.00E+00	0.00E+00	0.00E+00
																										0.00E+00	0.00E+00	-0.00E+00	0.00E+00	-0.00E+00	0.00E+00		0.00E+00	0.00E+00	-0.00E+00	0.00E+00	-0.00E+00	0.00E+00	0.00E+00
																										0.00E+00	0.00E+00	-0.00E+00	0.00E+00	-0.00E+00	0.00E+00		0.00E+00	0.00E+00	-0.00E+00	0.00E+00	-0.00E+00	0.00E+00	0.00E+00
																										0.00E+00	0.00E+00	-0.00E+00	0.00E+00	-0.00E+00	0.00E+00		0.00E+00	0.00E+00	-0.00E+00	0.00E+00	-0.00E+00	0.00E+00	0.00E+00
																										0.00E+00	0.00E+00	-0.00E+00	0.00E+00	-0.00E+00	0.00E+00		0.00E+00	0.00E+00	-0.00E+00	0.00E+00	-0.00E+00	0.00E+00	0.00E+00
																										0.00E+00	0.00E+00	-0.00E+00	0.00E+00	-0.00E+00	0.00E+00		0.00E+00	0.00E+00	-0.00E+00	0.00E+00	-0.00E+00	0.00E+00	0.00E+00
																										0.00E+00	0.00E+00	-0.00E+00	0.00E+00	-0.00E+00	0.00E+00		0.00E+00	0.00E+00	-0.00E+00	0.00E+00	-0.00E+00	0.00E+00	0.00E+00
																										0.00E+00	0.00E+00	-0.00E+00	0.00E+00	-0.00E+00	0.00E+00		0.00E+00	0.00E+00	-0.00E+00	0.00E+00	-0.00E+00	0.00E+00	0.00E+00
																										0.00E+00	0.00E+00	-0.00E+00	0.00E+00	-0.00E+00	0.00E+00		0.00E+00	0.00E+00	-0.00E+00	0.00E+00	-0.00E+00	0.00E+00	0.00E+00
																										0.00E+00	0.00E+00	-0.00E+00	0.00E+00	-0.00E+00	0.00E+00		0.00E+00	0.00E+00	-0.00E+00	0.00E+00	-0.00E+00	0.00E+00	0.00E+00
																										0.00E+00	0.00E+00	-0.00E+00	0.00E+00	-0.00E+00	0.00E+00		0.00E+00	0.00E+00	-0.00E+00	0.00E+00	-0.00E+00	0.00E+00	0.00E+00
																										0.00E+00	0.00E+00	-0.00E+00	0.00E+00	-0.00E+00	0.00E+00		0.00E+00	0.00E+00	-0.00E+00	0.00E+00	-0.00E+00	0.00E+00	0.00E+00
																										0.00E+00	0.00E+00	-0.00E+00	0.00E+00	-0.00E+00	0.00E+00		0.00E+00	0.00E+00	-0.00E+00	0.00E+00	-0.00E+00	0.00E+00	0.00E+00
																										0.00E+00	0.00E+00	-0.00E+00	0.00E+00	-0.00E+00	0.00E+00		0.00E+00	0.00E+00	-0.00E+00	0.00E+00	-0.00E+00	0.00E+00	0.00E+00
																										0.00E+00	0.00E+00	-0.00E+00	0.00E+00	-0.00E+00	0.00E+00		0.00E+00	0.00E+00	-0.00E+00	0.00E+00	-0.00E+00	0.00E+00	0.00E+00
																										0.00E+00	0.00E+00	-0.00E+00	0.00E+00	-0.00E+00	0.00E+00		0.00E+00	0.00E+00	-0.00E+00	0.00E+00	-0.00E+00	0.00E+00	0.00E+00
																										0.00E+00	0.00E+00	-0.00E+00	0.00E+00	-0.00E+00	0.00E+00		0.00E+00	0.00E+00	-0.00E+00	0.00E+00	-0.00E+00	0.00E+00	0.00E+00
																										0.00E+00	0.00E+00	-0.00E+00	0.00E+00	-0.00E+00	0.00E+00		0.00E+00	0.00E+00	-0.00E+00	0.00E+00	-0.00E+00	0.00E+00	0.00E+00
																										0.00E+00	0.00E+00	-0.00E+00	0.00E+00	-0.00E+00	0.00E+00		0.00E+00	0.00E+00	-0.00E+00	0.00E+00	-0.00E+00	0.00E+00	0.00E+00
																										0.00E+00	0.00E+00	-0.00E+00	0.00E+00	-0.00E+00	0.00E+00		0.00E+00	0.00E+00	-0.00E+00	0.00E+00	-0.00E+00	0.00E+00	0.00E+00
																										0.00E+00	0.00E+00	-0.00E+00	0.00E+00	-0.00E+00	0.00E+00		0.00E+00	0.00E+00	-0.00E+00	0.00E+00	-0.00E+00	0.00E+00	0.00E+00
																										0.00E+00	0.00E+00	-0.00E+00	0.00E+00	-0.00E+00	0.00E+00		0.00E+00	0.00E+00	-0.00E+00	0.00E+00	-0.00E+00	0.00E+00	0.00E+00
																										0.00E+00	0.00E+00	-0.00E+00	0.00E+00	-0.00E+00	0.00E+00		0.00E+00	0.00E+00	-0.00E+00	0.00E+00	-0.00E+00	0.00E+00	0.00E+00
																										0.00E+00	0.00E+00	-0.00E+00	0.00E+00	-0.00E+00	0.00E+00		0.00E+00	0.00E+00	-0.00E+00	0.00E+00	-0.00E+00	0.00E+00	0.00E+00
																										0.00E+00	0.00E+00	-0.00E+00	0.00E+00	-0.00E+00	0.00E+00		0.00E+00	0.00E+00	-0.00E+00	0.00E+00	-0.00E+00	0.00E+00	0.00E+00
																										0.00E+00	0.00E+00	-0.00E+00	0.00E+00	-0.00E+00	0.00E+00		0.00E+00	0.00E+00	-0.00E+00	0.00E+00	-0.00E+00	0.00E+00	0.00E+00
																										0.00E+00	0.00E+00	-0.00E+00	0.00E+00	-0.00E+00	0.00E+00		0.00E+00	0.00E+00	-0.00E+00	0.00E+00	-0.00E+00	0.00E+00	0.00E+00
																										0.00E+00	0.00E+00	-0.00E+00	0.00E+00	-0.00E+00	0.00E+00		0.00E+00	0.00E+00	-0.00E+00	0.00E+00	-0.00E+00	0.00E+00	0.00E+00
																										0.00E+00	0.00E+00	-0.00E+00	0.00E+00	-0.00E+00	0.00E+00		0.00E+00	0.00E+00	-0.00E+00	0.00E+00	-0.00E+00	0.00E+00	0.00E+00
																										0.00E+00	0.00E+00	-0.00E+00	0.00E+00	-0.00E+00	0.00E+00		0.00E+00	0.00E+00	-0.00E+00	0.00E+00	-0.00E+00	0.00E+00	0.00E+00
																										0.00E+00	0.00E+00	-0.00E+00	0.00E+00	-0.00E+00	0.00E+00		0.00E+00	0.00E+00	-0.00E+00	0.00E+00	-0.00E+00	0.00E+00	0.00E+00
																										0.00E+00	0.00E+00	-0.00E+00	0.00E+00	-0.00E+00	0.00E+00		0.00E+00	0.00E+00	-0.00E+00	0.00E+00	-0.00E+00	0.00E+00	0.00E+00
																										0.00E+00	0.00E+00	-0.00E+00	0.00E+00	-0.00E+00	0.00E+00		0.00E+00	0.00E+00	-0.00E+00	0.00E+00	-0.00E+00	0.00E+00	0.00E+00
																										0.00E+00	0.00E+00	-0.00E+00	0.00E+00	-0.00E+00	0.00E+00		0.00E+00	0.00E+00	-0.00E+00	0.00E+00	-0.00E+00	0.00E+00	0.00E+00
																										0.00E+00	0.00E+00	-0.00E+00	0.00E+00	-0.00E+00	0.00E+00		0.00E+00	0.00E+00	-0.00E+00	0.00E+00	-0.00E+00	0.00E+00	0.00E+00
																										0.00E+00	0.00E+00	-0.00E+00	0.00E+00	-0.00E+00	0.00E+00		0.00E+00	0.00E+00	-0.00E+00	0.00E+00	-0.00E+00	0.00E+00	0.00E+00
																										0.00E+00	0.00E+00	-0.00E+00	0.00E+00	-0.00E+00	0.00E+00		0.00E+00	0.00E+00	-0.00E+00	0.00E+00	-0.00E+00	0.00E+00	0.00E+00
																										0.00E+00	0.00E+00	-0.00E+00	0.00E+00	-0.00E+00	0.00E+00		0.00E+00	0.00E+00	-0.00E+00	0.00E+00	-0.00E+00	0.00E+00	0.00E+00
																										0.00E+00	0.00E+00	-0.00E+00	0.00E+00	-0.00E+00	0.00E+00		0.00E+00	0.00E+00	-0.00E+00	0.00E+00	-0.00E+00	0.00E+00	0.00E+00
																										0.00E+00	0.00E+00	-0.00E+00	0.00E+00	-0.00E+00	0.00E+00		0.00E+00	0.00E+00	-0.00E+00	0.00E+00	-0.00E+00	0.00E+00	0.00E+00
																										0.00E+00	0.00E+00	-0.00E+00	0.00E+00	-0.00E+00	0.00E+00		0.00E+00	0.00E+00	-0.00E+00	0.00E+00	-0.00E+00	0.00E+00	0.00E+00
																										0.00E+00	0.00E+00	-0.00E+00	0.00E+00	-0.00E+00	0.00E+00		0.00E+00	0.00E+00	-0.00E+00	0.00E+00	-0.00E+00	0.00E+00	0.00E+00
																										0.00E+00	0.00E+00	-0.00E+00	0.00E+00	-0.00E+00	0.00E+00		0.00E+00	0.00E+00	-0.00E+00	0.00E+00	-0.00E+00	0.00E+00	0.00E+00
																										0.00E+00	0.00E+00	-0.00E+00	0.00E+00	-0.00E+00	0.00E+00		0.00E+00	0.00E+00	-0.00E+00	0.00E+00	-0.00E+00	0.00E+00	0.00E+00
																										0.00E+00	0.00E+00	-0.00E+00	0.00E+00	-0.00E+00	0.00E+00		0.00E+00	0.00E+00	-0.00E+00	0.00E+00	-0.00E+00	0.00E+00	0.00E+00
																										0.00E+00	0.00E+00	-0.00E+00	0.00E+00	-0.00E+00	0.00E+00		0.00E+00	0.00E+00	-0.00E+00	0.00E+00	-0.00E+00	0.00E+00	0.00E+00
																										0.00E+00	0.00E+00	-0.00E+00	0.00E+00	-0.00E+00	0.00E+00		0.00E+00	0.00E+00	-0.00E+00	0.00E+00	-0.00E+00	0.00E+00	0.00E+00
																										0.00E+00	0.00E+00	-0.00E+00	0.00E+00	-0.00E+00	0.00E+00		0.00E+00	0.00E+00	-0.00E+00	0.00E+00	-0.00E+00	0.00E+00	0.00E+00
																										0.00E+00	0.00E+00	-0.00E+00	0.00E+00	-0.00E+00	0.00E+00		0.00E+00	0.00E+00	-0.00E+00	0.00E+00	-0.00E+00	0.00E+00	0.00E+00
																										0.00E+00	0.00E+00	-0.00E+00	0.00E+00	-0.00E+00	0.00E+00		0.00E+00	0.00E+00	-0.00E+00	0.00E+00	-0.00E+00	0.00E+00	0.00E+00
																										0.00E+00	0.00E+00	-0.00E+00	0.00E+00	-0.00E+00	0.00E+00		0.00E+00	0.00E+00	-0.00E+00	0.00E+00	-0.00E+00	0.00E+00	0.00E+00
																										0.00E+00	0.00E+00	-0.00E+00	0.00E+00	-0.00E+00	0.00E+00		0.00E+00	0.00E+00	-0.00E+00	0.00E+00	-0.00E+00	0.00E+00	0.00E+00
																										0.00E+00	0.00E+00	-0.00E+00	0.00E+00	-0.00E+00	0.00E+00		0.00E+00	0.00E+00	-0.00E+00	0.00E+00	-0.00E+00	0.00E+00	0.00E+00
																										0.00E+00	0.00E+00	-0.00E+00	0.00E+00	-0.00E+00	0.00E+00		0.00E+00	0.00E+00	-0.00E+00	0.00E+00	-0.00E+00	0.00E+00	0.00E+00
																										0.00E+00	0.00E+00	-0.00E+00	0.00E+00	-0.00E+00	0.00E+00		0.00E+00	0.00E+00	-0.00E+00	0.00E+00	-0.00E+00	0.00E+00	0.00E+00
																										0.00E+00	0.00E+00	-0.00E+00	0.00E+00	-0.00E+00	0.00E+00		0.00E+00	0.00E+00	-0.00E+00	0.00E+00	-0.00E+00	0.00E+00	0.00E+00
																										0.00E+00	0.00E+00	-0.00E+00	0.00E+00	-0.00E+00	0.00E+00		0.00E+00	0.00E+00	-0.00E+00	0.00E+00	-0.00E+00	0.00E+00	0.00E+00
																										0.00E+00	0.00E+00	-0.00E+00	0.00E+00	-0.00E+00	0.00E+00		0.00E+00	0.00E+00	-0.00E+00	0.00E+00	-0.00E+00	0.00E+00	0.00E+00
																										0.00E+00	0.00E+00	-0.00E+00	0.00E+00	-0.00E+00	0.00E+00		0.00E+00	0.00E+00	-0.00E+00	0.00E+00	-0.00E+00	0.00E+00	0.00E+00
																										0.00E+00	0.00E+00	-0.00E+00	0.00E+00	-0.00E+00	0.00E+00		0.00E+00	0.00E+00	-0.00E+00	0.00E+00	-0.00E+00	0.00E+00	0.00E+00
																										0.00E+00	0.00E+00	-0.00E+00	0.00E+00	-0.00E+00	0.00E+00		0.00E+00	0.00E+00	-0.00E+00	0.00E+00	-0.00E+00	0.00E+00	0.00E+00
																										0.00E+00	0.00E+00	-0.00E+00	0.00E+00	-0.00E+00	0.00E+00		0.00E+00	0.00E+00	-0.00E+00	0.00E+00	-0.00E+00	0.00E+00	0.00E+00
																										0.00E+00	0.00E+00	-0.00E+00	0.00E+00	-0.00E+00	0.00E+00		0.00E+00	0.00E+00	-0.00E+00	0.00E+00	-0.00E+00	0.00E+00	0.00E+00
																										0.00E+00	0.00E+00	-0.00E+00	0.00E+00	-0.00E+00	0.00E+00		0.00E+00	0.00E+00	-0.00E+00	0.00E+00	-0.00E+00	0.00E+00	0.00E+00
																										0.00E+00	0.00E+00	-0.00E+00	0.00E+00	-0.00E+00	0.00E+00		0.00E+00	0.00E+00	-0.00E+00	0.00E+00	-0.00E+00	0.00E+00	0.00E+00
																										0.00E+00	0.00E+00	-0.00E+00	0.00E+00	-0.00E+00	0.00E+00		0.00E+00	0.00E+00	-0.00E+00	0.00E+00	-0.00E+00	0.00E+00	0.00E+00
																										0.00E+00	0.00E+00	-0.00E+00	0.00E+00	-0.00E+00	0.00E+00		0.00E+00	0.00E+00	-0.00E+00	0.00E+00	-0.00E+00	0.00E+00	0.00E+00
																										0.00E+00	0.00E+00	-0.00E+00	0.00E+00	-0.00E+00	0.00E+00		0.00E+00	0.00E+00	-0.00E+00	0.00E+00	-0.00E+00	0.00E+00	0.00E+00
																										0.00E+00	0.00E+00	-0.00E+00	0.00E+00	-0.00E+00	0.00E+00		0.00E+00	0.00E+00	-0.00E+00	0.00E+00	-0.00E+00	0.00E+00	0.00E+00
																										0.00E+00	0.00E+00	-0.00E+00	0.00E+00	-0.00E+00	0.00E+00		0.00E+00	0.00E+00	-0.00E+00	0.00E+00	-0.00E+00	0.00E+00	0.00E+00
																										0.00E+00	0.00E+00	-0.00E+00	0.00E+00	-0.00E+00	0.00E+00		0.00E+00	0.00E+00	-0.00E+00	0.00E+00	-0.00E+00	0.00E+00	0.00E+00
																										0.00E+00	0.00E+00	-0.00E+00	0.00E+00	-0.00E+00	0.00E+00		0.00E+00	0.00E+00	-0.00E+00	0.00E+00	-0.00E+00	0.00E+00	0.00E+00
																										0.00E+00	0.00E+00	-0.00E+00	0.00E+00	-0.00E+00	0.00E+00		0.00E+00	0.00E+00	-0.00E+00	0.00E+00	-0.00E+00	0.00E+00	0.00E+00
																										0.00E+00	0.00E+00	-0.00E+00	0.00E+00	-0.00E+00	0.00E+00		0.00E+00	0.00E+00	-0.00E+00	0.00E+00	-0.00E+00	0.00E+00	0.00E+00
																										0.00E+00	0.00E+00	-0.00E+00	0.00E+00	-0.00E+00	0.00E+00		0.00E+00	0.00E+00	-0.00E+00	0.00E+00	-0.00E+00	0.00E+00	0.00E+00
																										0.00E+00	0.00E+00	-0.00E+00	0.00E+00	-0.00E+00	0.00E+00		0.00E+00	0.00E+00	-0.00E+00	0.00E+00	-0.00E+00	0.00E+00	0.00E+00
																										0.00E+00	0.00E+00	-0.00E+00	0.00E+00	-0.00E+00	0.00E+00		0.00E+00	0.00E+00	-0.00E+00	0.00E+00	-0.00E+00	0.00E+00	0.00E+00
																										0.00E+00	0.00E+00	-0.00E+00	0.00E+00	-0.00E+00	0.00E+00		0.00E+00	0.00E+00	-0.00E+00	0.00E+00	-0.00E+00	0.00E+00	0.00E+00
																										0.00E+00	0.00E+00	-0.00E+00	0.00E+00	-0.00E+00	0.00E+00		0.00E+00	0.00E+00	-0.00E+00	0.00E+00	-0.00E+00	0.00E+00	0.00E+00
																										0.00E+00	0.00E+00	-0.00E+00	0.00E+00	-0.00E+00	0.00E+00		0.00E+00	0.00E+00	-0.00E+00	0.00E+00	-0.00E+00	0.00E+00	0.00E+00
																										0.00E+00	0.00E+00	-0.00E+00	0.00E+00	-0.00E+00	0.00E+00		0.00E+00	0.00E+00	-0.00E+00	0.00E+00	-0.00E+00	0.00E+00	0.00E+00
																										0.00E+00	0.00E+00	-0.00E+00	0.00E+00	-0.00E+00	0.00E+00		0.00E+00	0.00E+00	-0.00E+00	0.00E+00	-0.00E+00	0.00E+00	0.00E+00
																										0.00E+00	0.00E+00	-0.00E+00	0.00E+00	-0.00E+00	0.00E+00		0.00E+00	0.00E+00	-0.00E+00	0.00E+00	-0.00E+00	0.00E+00	0.00E+00
																										0.00E+00	0.00E+00	-0.00E+00	0.00E+00	-0.00E+00	0.00E+00		0.00E+00	0.00E+00	-0.00E+00	0.00E+00	-0.00E+00	0.00E+00	0.00E+00
																										0.00E+00	0.00E+00	-0.00E+00	0.00E+00	-0.00E+00	0.00E+00		0.00E+00	0.00E+00	-0.00E+00	0.00E+00	-0.00E+00	0.00E+00	0.00E+00
																										0.00E+00	0.00E+00	-0.00E+00	0.00E+00	-0.00E+00	0.00E+00		0.00E+00	0.00E+00	-0.00E+00	0.00E+00	-0.00E+00	0.00E+00	0.00E+00
																										0.00E+00	0.00E+00	-0.00E+00	0.00E+00	-0.00E+00	0.00E+00		0.00E+00	0.00E+00	-0.00E+00	0.00E+00	-0.00E+00	0.00E+00	0.00E+00
																										0.00E+00	0.00E+00	-0.00E+00	0.00E+00	-0.00E+00	0.00E+00		0.00E+00	0.00E+00	-0.00E+00	0.00E+00	-0.00E+00	0.00E+00	0.00E+00
																										0.00E+00	0.00E+00	-0.00E+00	0.00E+00	-0.00E+00	0.00E+00		0.00E+00	0.00E+00	-0.00E+00	0.00E+00	-0.00E+00	0.00E+00	0.00E+00
																										0.00E+00	0.00E+00	-0.00E+00	0.00E+00	-0.00E+00	0.00E+00		0.00E+00	0.00E+00	-0.00E+00	0.00E+00	-0.00E+00	0.00E+00	0.00E+00
																										0.00E+00	0.00E+00	-0.00E+00	0.00E+00	-0.00E+00	0.00E+00		0.00E+00	0.00E+00	-0.00E+00	0.00E+00	-0.00E+00	0.00E+00	0.00E+00
																										0.00E+00	0.00E+00	-0.00E+00	0.00E+00	-0.00E+00	0.00E+00		0.00E+00	0.00E+00	-0.00E+00	0.00E+00	-0.00E+00	0.00E+00	0.00E+00
																										0.00E+00	0.00E+00	-0.00E+00	0.00E+00	-0.00E+00	0.00E+00		0.00E+00	0.00E+00	-0.00E+00	0.00E+00	-0.00E+00	0.00E+00	0.00E+00
																										0.00E+00	0.00E+00	-0.00E+00	0.00E+00	-0.00E+00	0.00E+00		0.00E+00	0.00E+00	-0.00E+00	0.00E+00	-0.00E+00	0.00E+00	0.00E+00
																										0.00E+00	0.00E+00	-0.00E+00	0.00E+00	-0.00E+00	0.00E+00		0.00E+00	0.00E+00	-0.00E+00	0.00E+00	-0.00E+00	0.00E+00	0.00E+00
																										0.00E+00	0.00E+00	-0.00E+00	0.00E+00	-0.00E+00	0.00E+00		0.00E+00	0.00E+00	-0.00E+00	0.00E+00	-0.00E+00	0.00E+00	0.00E+00
																										0.00E+00	0.00E+00	-0.00E+00	0.00E+00	-0.00E+00	0.00E+00		0.00E+00	0.00E+00	-0.00E+00	0.00E+00	-0.00E+00	0.00E+00	0.00E+00
																										0.00E+00	0.00E+00	-0.00E+00	0.00E+00	-0.00E+00	0.00E+00		0.00E+00	0.00E+00	-0.00E+00	0.00E+00	-0.00E+00	0.00E+00	0.00E+00
																										0.00E+00	0.00E+00	-0.00E+00	0.00E+00	-0.00E+00	0.00E+00		0.00E+00	0.00E+00	-0.00E+00	0.00E+00	-0.00E+00	0.00E+00	0.00E+00
																										0.00E+00	0.00E+00	-0.00E+00	0.00E+00	-0.00E+00	0.00E+00		0.00E+00	0.00E+00	-0.00E+00	0.00E+00	-0.00E+00	0.00E+00	0.00E+00
																										0.00E+00	0.00E+00	-0.00E+00	0.00E+00	-0.00E+00	0.00E+00		0.00E+00	0.00E+00	-0.00E+00	0.00E+00	-0.00E+00	0.00E+00	0.00E+00
																										0.00E+00	0.00E+00	-0.00E+00	0.00E+00	-0.00E+00	0.00E+00		0.00E+00	0.00E+00	-0.00E+00	0.00E+00	-0.00E+00	0.00E+00	0.00E+00
																										0.00E+00	0.00E+00	-0.00E+00	0.00E+00	-0.00E+00	0.00E+00		0.00E+00	0.00E+00	-0.00E+00	0.00E+00	-0.00E+00	0.00E+00	0.00E+00
																										0.00E+00	0.00E+00	-0.00E+00	0.00E+00	-0.00E+00	0.00E+00		0.00E+00	0.00E+00	-0.00E+00	0.00E+00	-0.00E+00	0.00E+00	0.00E+00
																										0.00E+00	0.00E+00	-0.00E+00	0.00E+00	-0.00E+00	0.00E+00		0.00E+00	0.00E+00	-0.00E+00	0.00E+00	-0.00E+00	0.00E+00	0.00E+00
																										0.00E+00	0.00E+00	-0.00E+00	0.00E+00	-0.00E+00	0.00E+00		0.00E+00	0.00E+00	-0.00E+00	0.00E+00	-0.00E+00	0.00E+00	0.00E+00
																										0.00E+00	0.00E+00	-0.00E+00	0.00E+00	-0.00E+00	0.00E+00		0.00E+00	0.00E+00	-0.00E+00	0.00E+00	-0.00E+00	0.00E+00	0.00E+00
																										0.00E+00	0.00E+00	-0.00E+00	0.00E+00	-0.00E+00	0.00E+00		0.00E+00	0.00E+00	-0.00E+00	0.00E+00	-0.00E+00	0.00E+00	0.00E+00
																										0.00E+00	0.00E+00	-0.00E+00	0.00E+00	-0.00E+00	0.00E+00		0.00E+00	0.00E+00	-0.00E+00	0.00E+00	-0.00E+00	0.00E+00	0.00E+00
																										0.00E+00	0.00E+00	-0.00E+00	0.00E+00	-0.00E+00	0.00E+00		0.00E+00	0.00E+00	-0.00E+00	0.00E+00	-0.00E+00	0.00E+00	0.00E+00
																										0.00E+00	0.00E+00	-0.00E+00	0.00E+00	-0.00E+00	0.00E+00		0.00E+00	0.00E+00	-0.00E+00	0.00E+00	-0.00E+00	0.00E+00	0.00E+00
																										0.00E+00	0.00E+00	-0.00E+00	0.00E+00	-0.00E+00	0.00E+00		0.00E+00	0.00E+00	-0.00E+00	0.00E+00	-0.00E+00	0.00E+00	0.00E+00
																										0.00E+00	0.00E+00	-0.00E+00	0.00E+00	-0.00E+00	0.00E+00		0.00E+00	0.00E+00	-0.00E+00	0.00E+00	-0.00E+00	0.00E+00	0.00E+00
																										0.00E+00	0.00E+00	-0.00E+00	0.00E+00	-0.00E+00	0.00E+00		0.00E+00	0.00E+00	-0.00E+00	0.00E+00	-0.00E+00	0.00E+00	0.00E+00
																										0.00E+00	0.00E+00	-0.00E+00	0.00E+00	-0.00E+00	0.00E+00		0.00E+00	0.00E+00	-0.00E+00	0.00E+00	-0.00E+00	0.00E+00	0.00E+00
																										0.00E+00	0.00E+00	-0.00E+00	0.00E+00	-0.00E+00	0.00E+00		0.00E+00	0.00E+00	-0.00E+00	0.00E+00	-0.00E+00	0.00E+00	0.00E+00
																										0.00E+00	0.00E+00	-0.00E+00	0.00E+00	-0.00E+00	0.00E+00		0.00E+00	0.00E+00	-0.00E+00	0.00E+00	-0.00E+00	0.00E+00	0.00E+00
																										0.00E+00	0.00E+00	-0.00E+00	0.00E+00	-0.00E+00	0.00E+00		0.00E+00	0.00E+00	-0.00E+00	0.00E+00	-0.00E+00	0.00E+00	0.00E+00
																										0.00E+00	0.00E+00	-0.00E+00	0.00E+00	-0.00E+00	0.00E+00		0.00E+00	0.00E+00	-0.00E+00	0.00E+00	-0.00E+00	0.00E+00	0.00E+00
																										0.00E+00	0.00E+00	-0.00E+00	0.00E+00	-0.00E+00	0.00E+00		0.00E+00	0.00E+00	-0.00E+00	0.00E+00	-0.00E+00	0.00E+00	0.00E+00
																										0.00E+00	0.00E+00	-0.00E+00	0.00E+00	-0.00E+00	0.00E+00		0.00E+00	0.00E+00	-0.00E+00	0.00E+00	-0.00E+00	0.00E+00	0.00E+00
																										0.00E+00	0.00E+00	-0.00E+00	0.00E+00	-0.00E+00	0.00E+00		0.00E+00	0.00E+00	-0.00E+00	0.00E+00	-0.00E+00	0.00E+00	0.00E+00
																										0.00E+00	0.00E+00	-0.00E+00	0.00E+00	-0.00E+00	0.00E+00		0.00E+00	0.00E+00	-0.00E+00	0.00E+00	-0.00E+00	0.00E+00	0.00E+00
																										0.00E+00	0.00E+00	-0.00E+00	0.00E+00	-0.00E+00	0.00E+00		0.00E+00	0.00E+00	-0.00E+00	0.00E+00	-0.00E+00	0.00E+00	0.00E+00
																										0.00E+00	0.00E+00	-0.00E+00	0.00E+00	-0.00E+00	0.00E+00		0.00E+00	0.00E+00	-0.00E+00	0.00E+00	-0.00E+00	0.00E+00	0.00E+00
																										0.00E+00	0.00E+00	-0.00E+00	0.00E+00	-0.00E+00	0.00E+00		0.00E+00	0.00E+00	-0.00E+00	0.00E+00	-0.00E+00	0.00E+00	0.00E+00
																										0.00E+00	0.00E+00	-0.00E+00	0.00E+00	-0.00E+00	0.00E+00		0.00E+00	0.00E+00	-0.00E+00	0.00E+00	-0.00E+00	0.00E+00	0.00E+00
																										0.00E+00	0.00E+00	-0.00E+00	0.00E+00	-0.00E+00	0.00E+00		0.00E+00	0.00E+00	-0.00E+00	0.00E+00	-0.00E+00	0.00E+00	0.00E+00
																										0.00E+00	0.00E+00	-0.00E+00	0.00E+00	-0.00E+00	0.00E+00		0.00E+00	0.00E+00	-0.00E+00	0.00E+00	-0.00E+00	0.00E+00	0.00E+00
																										0.00E+00	0.00E+00	-0.00E+00	0.00E+00	-0.00E+00	0.00E+00		0.00E+00	0.00E+00	-0.00E+00	0.00E+00	-0.00E+00	0.00E+00	0.00E+00
																										0.00E+00	0.00E+00	-0.00E+00	0.00E+00	-0.00E+00	0.00E+00		0.00E+00	0.00E+00	-0.00E+00	0.00E+00	-0.00E+00	0.00E+00	0.00E+00
																										0.00E+00	0.00E+00	-0.00E+00	0.00E+00	-0.00E+00	0.00E+00		0.00E+00	0.00E+00	-0.00E+00	0.00E+00	-0.00E+00	0.00E+00	0.00E+00
																										0.00E+00	0.00E+00	-0.00E+00	0.00E+00	-0.00E+00	0.00E+00		0.00E+00	0.00E+00	-0.00E+00	0.00E+00	-0.00E+00	0.00E+00	0.00E+00
																										0.00E+00	0.00E+00	-0.00E+00	0.00E+00	-0.00E+00	0.00E+00		0.00E+00	0.00E+00	-0.00E+00	0.00E+00	-0.00E+00	0.00E+00	0.00E+00
																										0.00E+00	0.00E+00	-0.00E+00	0.00E+00	-0.00E+00	0.00E+00		0.00E+00	0.00E+00	-0.00E+00	0.00E+00	-0.00E+00	0.00E+00	0.00E+00
																										0.00E+00	0.00E+00	-0.00E+00	0.00E+00	-0.00E+00	0.00E+00		0.00E+00	0.00E+00	-0.00E+00	0.00E+00	-0.00E+00	0.00E+00	0.00E+00
																										0.00E+00	0.00E+00	-0.00E+00	0.00E+00	-0.00E+00	0.00E+00		0.00E+00	0.00E+00	-0.00E+00	0.00E+00	-0.00E+00	0.00E+00	0.00E+00
																										0.00E+00	0.00E+00	-0.00E+00	0.00E+00	-0.00E+00	0.00E+00		0.00E+00	0.00E+00	-0.00E+00	0.00E+00	-0.00E+00	0.00E+00	0.00E+00
																										0.00E+00	0.00E+00	-0.00E+00	0.00E+00	-0.00E+00	0.00E+00		0.00E+00	0.00E+00	-0.00E+00	0.00E+00	-0.00E+00	0.00E+00	0.00E+00
																										0.00E+00	0.00E+00	-0.00E+00	0.00E+00	-0.00E+00	0.00E+00		0.00E+00	0.00E+00	-0.00E+00	0.00E+00	-0.00E+00	0.00E+00	0.00E+00
																										0.00E+00	0.00E+00	-0.00E+00	0.00E+00	-0.00E+00	0.00E+00		0.00E+00	0.00E+00	-0.00E+00	0.00E+00	-0.00E+00	0.00E+00	0.00E+00
																										0.00E+00	0.00E+00	-0.00E+00	0.00E+00	-0.00E+00	0.00E+00		0.00E+00	0.00E+00	-0.00E+00	0.00E+00	-0.00E+00	0.00E+00	0.00E+00
																										0.00E+00	0.00E+00	-0.00E+00	0.00E+00	-0.00E+00	0.00E+00		0.00E+00	0.00E+00	-0.00E+00	0.00E+00	-0.00E+00	0.00E+00	0.00E+00
																										0.00E+00	0.00E+00	-0.00E+00	0.00E+00	-0.00E+00	0.00E+00		0.00E+00	0.00E+00	-0.00E+00	0.00E+00	-0.00E+00	0.00E+00	0.00E+00
																										0.00E+00	0.00E+00	-0.00E+00	0.00E+00	-0.00E+00	0.00E+00		0.00E+00	0.00E+00	-0.00E+00	0.00E+00	-0.00E+00	0.00E+00	0.00E+00
																										0.00E+00	0.00E+00	-0.00E+00	0.00E+00	-0.00E+00	0.00E+00		0.00E+00	0.00E+00	-0.00E+00	0.00E+00	-0.00E+00	0.00E+00	0.00E+00
																										0.00E+00	0.00E+00	-0.00E+00	0.00E+00	-0.00E+00	0.00E+00		0.00E+00	0.00E+00	-0.00E+00	0.00E+00	-0.00E+00	0.00E+00	0.00E+00
																										0.00E+00	0.00E+00	-0.00E+00	0.00E+00	-0.00E+00	0.00E+00		0.00E+00	0.00E+00	-0.00E+00	0.00E+00	-0.00E+00	0.00E+00	0.00E+00
																										0.00E+00	0.00E+00	-0.00E+00	0.00E+00	-0.00E+00	0.00E+00		0.00E+00	0.00E+00	-0.00E+00	0.00E+00	-0.00E+00	0.00E+00	0.00E+00
																										0.00E+00	0.00E+00	-0.00E+00	0.00E+00	-0.00E+00	0.00E+00		0.00E+00	0.00E+00	-0.00E+00	0.00E+00	-0.00E+00	0.00E+00	0.00E+00
																										0.00E+00	0.00E+00	-0.00E+00	0.00E+00	-0.00E+00	0.00E+00		0.00E+00	0.00E+00	-0.00E+00	0.00E+00	-0.00E+00	0.00E+00	0.00E+00
																										0.00E+00	0.00E+00	-0.00E+00	0.00E+00	-0.00E+00	0.00E+00		0.00E+00	0.00E+00	-0.00E+00	0.00E+00	-0.00E+00	0.00E+00	0.00E+00
																										0.00E+00	0.00E+00	-0.00E+00	0.00E+00	-0.00E+00	0.00E+00		0.00E+00	0.00E+00	-0.00E+00	0.00E+00	-0.00E+00	0.00E+00	0.00E+00
																										0.00E+00	0.00E+00	-0.00E+00	0.00E+00	-0.00E+00	0.00E+00		0.00E+00	0.00E+00	-0.00E+00	0.00E+00	-0.00E+00	0.00E+00	0.00E+00
																										0.00E+00	0.00E+00	-0.00E+00	0.00E+00	-0.00E+00	0.00E+00		0.00E+00	0.00E+00	-0.00E+00	0.00E+00	-0.00E+00	0.00E+00	0.00E+00
																										0.00E+00	0.00E+00	-0.00E+00	0.00E+00	-0.00E+00	0.00E+00		0.00E+00	0.00E+00	-0.00E+00	0.00E+00	-0.00E+00	0.00E+00	0.00E+00
																										0.00E+00	0.00E+00	-0.00E+00	0.00E+00	-0.00E+00	0.00E+00		0.00E+00	0.00E+00	-0.00E+00	0.00E+00	-0.00E+00	0.00E+00	0.00E+00
																										0.00E+00	0.00E+00	-0.00E+00	0.00E+00	-0.00E+00	0.00E+00		0.00E+00	0.00E+00	-0.00E+00	0.00E+00	-0.00E+00	0.00E+00	0.00E+00
																										0.00E+00	0.00E+00	-0.00E+00	0.00E+00	-0.00E+00	0.00E+00		0.00E+00	0.00E+00	-0.00E+00	0.00E+00	-0.00E+00	0.00E+00	0.00E+00
																										0.00E+00	0.00E+00	-0.00E+00	0.00E+00	-0.00E+00	0.00E+00		0.00E+00	0.00E+00	-0.00E+00	0.00E+00	-0.00E+00	0.00E+00	0.00E+00
																										0.00E+00	0.00E+00	-0.00E+00	0.00E+00	-0.00E+00	0.00E+00		0.00E+00	0.00E+00	-0.00E+00	0.00E+00	-0.00E+00	0.00E+00	0.00E+00
																										0.00E+00	0.00E+00	-0.00E+00	0.00E+00	-0.00E+00	0.00E+00		0.00E+00	0.00E+00	-0.00E+00	0.00E+00	-0.00E+00	0.00E+00	0.00E+00
																										0.00E+00	0.00E+00	-0.00E+00	0.00E+00	-0.00E+00	0.00E+00		0.00E+00	0.00E+00	-0.00E+00	0.00E+00	-0.00E+00	0.00E+00	0.00E+00
																										0.00E+00	0.00E+00	-0.00E+00	0.00E+00	-0.00E+00	0.00E+00		0.00E+00	0.00E+00	-0.00E+00	0.00E+00	-0.00E+00	0.00E+00	0.00E+00
																										0.00E+00	0.00E+00	-0.00E+00	0.00E+00	-0.00E+00	0.00E+00		0.00E+00	0.00E+00	-0.00E+00	0.00E+00	-0.00E+00	0.00E+00	0.00E+00
			For enlarging the range copy A1020:AN1020 downwards as much as needed.
			Adjust the summations in AA3:AN3, N2, N9, O9

## Sheet: Graph
Show the following functions in the graphs (set 1 to show, else to suppress)							* * *					R	n		80	No. of points	m1 (CI z)	80	80	0	54				0.00E+00	P(BE+G4)	0.37%					7.49E-01	0.00E+00				Copies from Test
1	<< P(BE)	available			<< P(t)			<< Rmin				1.87E-01	2.53E+002				0.00E+00	1	1	0	2.00E+00				0.00E+00								0.00E+00				Parameters:
1	<< P(G4)	available			<< z Fisher		0.3	<< Rmax													2.00E+00				2.72E+00								-2.01E+00					BE	G4	SU
	<< P(SU)	not available			<< z as conf. interval CI		0.100%	<< Pmin of Y-axis													7.49E-01				4.41E-01								-2.01E+00				r =	6.45E+00	2.17E+00	no solution
1	<<P(BE+G4)	available		for 2x2 tables CI often does not make sense																						Graph data								5.00E-01			u =	1.69E+01	1.53E+00	*
BE+G4	is best														0.00E+00	0.00E+00		5.28E-01	5.26E-01	*	5.27E-01	0.00E+00	5.00E-01	5.00E-01	1.00E+00	0.00E+00	4.72E-01	4.74E-01	*	4.73E-01	5.00E-01	5.00E-01	0.00E+00				a =	1.92E-01	1.63E-01	*
															0.00E+00	0.00E+00		5.28E-01	5.26E-01	*	5.27E-01	0.00E+00	5.00E-01	5.00E-01	1.00E+00	0.00E+00	4.72E-01	4.74E-01	*	4.73E-01	5.00E-01	5.00E-01	0.00E+00				c =	6.96E-01	1.45E-01	*
											Code in InOut.X5, Y5		Yates correction		1.87E-01	1.87E-01		9.96E-01	9.96E-01	*	9.96E-01	3.02E+00	9.99E-01	9.99E-01	3.01E+00	1.87E-01	3.74E-03	3.82E-03	*	3.76E-03	1.39E-03	1.37E-03	-2.01E+00				b3 =	3.91E-01	3.91E-01	*
												Code 4	0.00E+00	Test R =	1.87E-01	1.87E-01		9.96E-01	9.96E-01	*	9.96E-01	3.02E+00	9.99E-01	9.99E-01	3.01E+00	1.87E-01	3.74E-03	3.82E-03	*	3.76E-03	1.39E-03	1.37E-03	-2.01E+00				b4 =	2.99E+00	2.99E+00	*
												0.00E+00			R corrr FMA	R c. Yates	z CI	P(BE)	P(G4)	*	P(BE+G4)	t	P(t)	z Fisher	rr	R	BE	G4	*	BE+G4	*	*	test	*	Fish exact		b5 =	3.56E+00	3.68E+00	*
												1.29E-06	corr. FMA	scale for IC	-1.95E-01	-1.95E-01	9.11E-04	*	*	*	*	-3.14E+00	9.32E-04	9.11E-04	1.67E-01	-1.95E-01	*	*	*	*	*	*		*			crit. b4>	1.15E+00	1.92E+00	3.27E+00	Sign(b3)=	1
												1	0.00E+00	1.27E-03	-1.93E-01	-1.93E-01	9.78E-04	*	*	*	*	-3.12E+00	1.00E-03	9.78E-04	1.71E-01	-1.93E-01	*	*	*	*	*	*		*			crit. b4<	3.23E+00	3.27E+00		Precision=	1.00E-08
													Pmin >>	1.00E-03	-1.92E-01	-1.92E-01	1.05E-03	*	*	*	*	-3.10E+00	1.07E-03	1.05E-03	1.75E-01	-1.92E-01	*	*	*	*	*	*		*			Min(X)=	-1.92E-01	-1.63E-01	*
													std dev	6.30E-02	-1.91E-01	-1.91E-01	1.12E-03	8.27E-14	*	*	*	-3.08E+00	1.15E-03	1.12E-03	1.78E-01	-1.91E-01	#VALUE!	*	*	*	*	*		*			Max(X)=	5.04E-01	1.00E+00	*	m1 for CI	0
															-1.90E-01	-1.90E-01	1.21E-03	1.32E-11	*	*	*	-3.06E+00	1.23E-03	1.21E-03	1.82E-01	-1.90E-01	#VALUE!	*	*	*	*	*		*							m1 =	0.00000
													R graph=	-0.1946663375	-1.88E-01	-1.88E-01	1.29E-03	2.13E-10	*	*	*	-3.04E+00	1.32E-03	1.29E-03	1.86E-01	-1.88E-01	#VALUE!	*	*	*	*	*		*							m2 =	0.00397
														0.3	-1.87E-01	-1.87E-01	1.38E-03	1.46E-09	*	*	*	-3.02E+00	1.41E-03	1.38E-03	1.90E-01	-1.87E-01	#VALUE!	*	*	*	*	*		*							β3 =	0.39056
															-1.86E-01	-1.86E-01	1.48E-03	6.36E-09	*	*	*	-3.00E+00	1.51E-03	1.48E-03	1.94E-01	-1.86E-01	#VALUE!	*	*	*	*	*		*							β4 =	2.99268
															-1.84E-01	-1.84E-01	1.58E-03	2.09E-08	*	*	*	-2.97E+00	1.61E-03	1.58E-03	1.98E-01	-1.84E-01	#VALUE!	*	*	*	*	*		*
															-1.83E-01	-1.83E-01	1.69E-03	5.64E-08	*	*	*	-2.95E+00	1.72E-03	1.69E-03	2.02E-01	-1.83E-01	#VALUE!	*	*	*	*	*		*
															-1.82E-01	-1.82E-01	1.81E-03	1.33E-07	*	*	*	-2.93E+00	1.84E-03	1.81E-03	2.05E-01	-1.82E-01	#VALUE!	*	*	*	*	*		*
															-1.81E-01	-1.81E-01	1.94E-03	2.81E-07	*	*	*	-2.91E+00	1.97E-03	1.94E-03	2.09E-01	-1.81E-01	#VALUE!	*	*	*	*	*		*
															-1.79E-01	-1.79E-01	2.07E-03	5.47E-07	*	*	*	-2.89E+00	2.10E-03	2.07E-03	2.13E-01	-1.79E-01	#VALUE!	*	*	*	*	*		*
															-1.78E-01	-1.78E-01	2.21E-03	9.95E-07	*	*	*	-2.87E+00	2.24E-03	2.21E-03	2.17E-01	-1.78E-01	#VALUE!	*	*	*	*	*		*
															-1.77E-01	-1.77E-01	2.36E-03	1.71E-06	*	*	*	-2.85E+00	2.39E-03	2.36E-03	2.21E-01	-1.77E-01	#VALUE!	*	*	*	*	*		*
															-1.76E-01	-1.76E-01	2.51E-03	2.82E-06	*	*	*	-2.83E+00	2.55E-03	2.51E-03	2.25E-01	-1.76E-01	#VALUE!	*	*	*	*	*		*
															-1.74E-01	-1.74E-01	2.68E-03	4.46E-06	*	*	*	-2.80E+00	2.71E-03	2.68E-03	2.29E-01	-1.74E-01	#VALUE!	*	*	*	*	*		*
															-1.73E-01	-1.73E-01	2.86E-03	6.82E-06	*	*	*	-2.78E+00	2.89E-03	2.86E-03	2.33E-01	-1.73E-01	#VALUE!	*	*	*	*	*		*
															-1.72E-01	-1.72E-01	3.04E-03	1.01E-05	*	*	*	-2.76E+00	3.08E-03	3.04E-03	2.37E-01	-1.72E-01	#VALUE!	*	*	*	*	*		*
															-1.71E-01	-1.71E-01	3.24E-03	1.46E-05	*	*	*	-2.74E+00	3.28E-03	3.24E-03	2.42E-01	-1.71E-01	#VALUE!	*	*	*	*	*		*
															-1.69E-01	-1.69E-01	3.45E-03	2.07E-05	*	*	*	-2.72E+00	3.49E-03	3.45E-03	2.46E-01	-1.69E-01	#VALUE!	*	*	*	*	*		*
															-1.68E-01	-1.68E-01	3.67E-03	2.87E-05	*	*	*	-2.70E+00	3.71E-03	3.67E-03	2.50E-01	-1.68E-01	#VALUE!	*	*	*	*	*		*
															-1.67E-01	-1.67E-01	3.90E-03	3.90E-05	*	*	*	-2.68E+00	3.94E-03	3.90E-03	2.54E-01	-1.67E-01	#VALUE!	*	*	*	*	*		*
															-1.65E-01	-1.65E-01	4.15E-03	5.22E-05	*	*	*	-2.66E+00	4.19E-03	4.15E-03	2.58E-01	-1.65E-01	#VALUE!	*	*	*	*	*		*
															-1.64E-01	-1.64E-01	4.41E-03	6.88E-05	*	*	*	-2.64E+00	4.45E-03	4.41E-03	2.62E-01	-1.64E-01	#VALUE!	*	*	*	*	*		*
															-1.63E-01	-1.63E-01	4.68E-03	8.95E-05	*	*	*	-2.62E+00	4.73E-03	4.68E-03	2.66E-01	-1.63E-01	#VALUE!	*	*	*	*	*		*
															-1.62E-01	-1.62E-01	4.97E-03	1.15E-04	9.62E-08	*	8.61E-05	-2.59E+00	5.02E-03	4.97E-03	2.71E-01	-1.62E-01	*	*	*	*	*	*		*
															-1.60E-01	-1.60E-01	5.28E-03	1.46E-04	1.01E-06	*	1.10E-04	-2.57E+00	5.32E-03	5.28E-03	2.75E-01	-1.60E-01	*	*	*	*	*	*		*
															-1.59E-01	-1.59E-01	5.60E-03	1.84E-04	3.95E-06	*	1.38E-04	-2.55E+00	5.64E-03	5.60E-03	2.79E-01	-1.59E-01	*	*	*	*	*	*		*
															-1.58E-01	-1.58E-01	5.94E-03	2.28E-04	1.04E-05	*	1.74E-04	-2.53E+00	5.98E-03	5.94E-03	2.83E-01	-1.58E-01	*	*	*	*	*	*		*
															-1.57E-01	-1.57E-01	6.29E-03	2.82E-04	2.19E-05	*	2.16E-04	-2.51E+00	6.34E-03	6.29E-03	2.87E-01	-1.57E-01	*	*	*	*	*	*		*
															-1.55E-01	-1.55E-01	6.67E-03	3.45E-04	4.02E-05	*	2.68E-04	-2.49E+00	6.71E-03	6.67E-03	2.92E-01	-1.55E-01	*	*	*	*	*	*		*
															-1.54E-01	-1.54E-01	7.06E-03	4.18E-04	6.73E-05	*	3.30E-04	-2.47E+00	7.11E-03	7.06E-03	2.96E-01	-1.54E-01	*	*	*	*	*	*		*
															-1.53E-01	-1.53E-01	7.48E-03	5.04E-04	1.05E-04	*	4.04E-04	-2.45E+00	7.52E-03	7.48E-03	3.00E-01	-1.53E-01	*	*	*	*	*	*		*
															-1.51E-01	-1.51E-01	7.91E-03	6.04E-04	1.56E-04	*	4.91E-04	-2.43E+00	7.96E-03	7.91E-03	3.05E-01	-1.51E-01	*	*	*	*	*	*		*
															-1.50E-01	-1.50E-01	8.37E-03	7.18E-04	2.21E-04	*	5.93E-04	-2.41E+00	8.42E-03	8.37E-03	3.09E-01	-1.50E-01	*	*	*	*	*	*		*
															-1.49E-01	-1.49E-01	8.85E-03	8.48E-04	3.04E-04	*	7.11E-04	-2.39E+00	8.90E-03	8.85E-03	3.13E-01	-1.49E-01	*	*	*	*	*	*		*
															-1.48E-01	-1.48E-01	9.36E-03	9.97E-04	4.06E-04	*	8.48E-04	-2.36E+00	9.40E-03	9.36E-03	3.18E-01	-1.48E-01	*	*	*	*	*	*		*
															-1.46E-01	-1.46E-01	9.89E-03	1.17E-03	5.29E-04	*	1.01E-03	-2.34E+00	9.93E-03	9.89E-03	3.22E-01	-1.46E-01	*	*	*	1.01E-03	*	*		*
															-1.45E-01	-1.45E-01	1.04E-02	1.36E-03	6.77E-04	*	1.19E-03	-2.32E+00	1.05E-02	1.04E-02	3.27E-01	-1.45E-01	*	*	*	1.19E-03	*	*		*
															-1.44E-01	-1.44E-01	1.10E-02	1.57E-03	8.51E-04	*	1.39E-03	-2.30E+00	1.11E-02	1.10E-02	3.31E-01	-1.44E-01	*	*	*	1.39E-03	*	*		*
															-1.43E-01	-1.43E-01	1.16E-02	1.81E-03	1.05E-03	*	1.62E-03	-2.28E+00	1.17E-02	1.16E-02	3.36E-01	-1.43E-01	1.05E-03	1.05E-03	*	1.62E-03	*	*		*
															-1.41E-01	-1.41E-01	1.23E-02	2.08E-03	1.29E-03	*	1.88E-03	-2.26E+00	1.23E-02	1.23E-02	3.40E-01	-1.41E-01	1.29E-03	1.29E-03	*	1.88E-03	*	*		*
															-1.40E-01	-1.40E-01	1.29E-02	2.37E-03	1.56E-03	*	2.17E-03	-2.24E+00	1.30E-02	1.29E-02	3.45E-01	-1.40E-01	1.56E-03	1.56E-03	*	2.17E-03	*	*		*
															-1.39E-01	-1.39E-01	1.36E-02	2.70E-03	1.86E-03	*	2.49E-03	-2.22E+00	1.37E-02	1.36E-02	3.49E-01	-1.39E-01	1.86E-03	1.86E-03	*	2.49E-03	*	*		*
															-1.37E-01	-1.37E-01	1.44E-02	3.06E-03	2.21E-03	*	2.85E-03	-2.20E+00	1.44E-02	1.44E-02	3.54E-01	-1.37E-01	2.21E-03	2.21E-03	*	2.85E-03	*	*		*
															-1.36E-01	-1.36E-01	1.51E-02	3.46E-03	2.59E-03	*	3.24E-03	-2.18E+00	1.52E-02	1.51E-02	3.58E-01	-1.36E-01	2.59E-03	2.59E-03	*	3.24E-03	*	*		*
															-1.35E-01	-1.35E-01	1.59E-02	3.90E-03	3.02E-03	*	3.68E-03	-2.16E+00	1.60E-02	1.59E-02	3.63E-01	-1.35E-01	3.02E-03	3.02E-03	*	3.68E-03	*	*		*
															-1.34E-01	-1.34E-01	1.68E-02	4.38E-03	3.50E-03	*	4.16E-03	-2.14E+00	1.68E-02	1.68E-02	3.67E-01	-1.34E-01	3.50E-03	3.50E-03	*	4.16E-03	*	*		*
															-1.32E-01	-1.32E-01	1.76E-02	4.90E-03	4.02E-03	*	4.68E-03	-2.12E+00	1.77E-02	1.76E-02	3.72E-01	-1.32E-01	4.02E-03	4.02E-03	*	4.68E-03	*	*		*
															-1.31E-01	-1.31E-01	1.86E-02	5.47E-03	4.60E-03	*	5.25E-03	-2.09E+00	1.86E-02	1.86E-02	3.77E-01	-1.31E-01	4.60E-03	4.60E-03	*	5.25E-03	*	*		*
															-1.30E-01	-1.30E-01	1.95E-02	6.09E-03	5.23E-03	*	5.87E-03	-2.07E+00	1.95E-02	1.95E-02	3.81E-01	-1.30E-01	5.23E-03	5.23E-03	*	5.87E-03	*	*		*
															-1.29E-01	-1.29E-01	2.05E-02	6.75E-03	5.92E-03	*	6.54E-03	-2.05E+00	2.05E-02	2.05E-02	3.86E-01	-1.29E-01	5.92E-03	5.92E-03	*	6.54E-03	*	*		*
															-1.27E-01	-1.27E-01	2.15E-02	7.47E-03	6.67E-03	*	7.27E-03	-2.03E+00	2.16E-02	2.15E-02	3.91E-01	-1.27E-01	6.67E-03	6.67E-03	*	7.27E-03	*	*		*
															-1.26E-01	-1.26E-01	2.26E-02	8.25E-03	7.48E-03	*	8.06E-03	-2.01E+00	2.26E-02	2.26E-02	3.96E-01	-1.26E-01	7.48E-03	7.48E-03	*	8.06E-03	*	*		*
															-1.25E-01	-1.25E-01	2.37E-02	9.09E-03	8.35E-03	*	8.90E-03	-1.99E+00	2.37E-02	2.37E-02	4.00E-01	-1.25E-01	8.35E-03	8.35E-03	*	8.90E-03	*	*		*
															-1.23E-01	-1.23E-01	2.49E-02	9.99E-03	9.29E-03	*	9.81E-03	-1.97E+00	2.49E-02	2.49E-02	4.05E-01	-1.23E-01	9.29E-03	9.29E-03	*	9.81E-03	*	*		*
															-1.22E-01	-1.22E-01	2.61E-02	1.09E-02	1.03E-02	*	1.08E-02	-1.95E+00	2.61E-02	2.61E-02	4.10E-01	-1.22E-01	1.03E-02	1.03E-02	*	1.08E-02	*	*		*
															-1.21E-01	-1.21E-01	2.74E-02	1.20E-02	1.14E-02	*	1.18E-02	-1.93E+00	2.74E-02	2.74E-02	4.15E-01	-1.21E-01	1.14E-02	1.14E-02	*	1.18E-02	*	*		*
															-1.20E-01	-1.20E-01	2.87E-02	1.31E-02	1.25E-02	*	1.29E-02	-1.91E+00	2.87E-02	2.87E-02	4.20E-01	-1.20E-01	1.25E-02	1.25E-02	*	1.29E-02	*	*		*
															-1.18E-01	-1.18E-01	3.00E-02	1.42E-02	1.38E-02	*	1.41E-02	-1.89E+00	3.00E-02	3.00E-02	4.24E-01	-1.18E-01	1.38E-02	1.38E-02	*	1.41E-02	*	*		*
															-1.17E-01	-1.17E-01	3.14E-02	1.55E-02	1.51E-02	*	1.54E-02	-1.87E+00	3.15E-02	3.14E-02	4.29E-01	-1.17E-01	1.51E-02	1.51E-02	*	1.54E-02	*	*		*
															-1.16E-01	-1.16E-01	3.29E-02	1.68E-02	1.65E-02	*	1.67E-02	-1.85E+00	3.29E-02	3.29E-02	4.34E-01	-1.16E-01	1.65E-02	1.65E-02	*	1.67E-02	*	*		*
															-1.15E-01	-1.15E-01	3.44E-02	1.82E-02	1.79E-02	*	1.81E-02	-1.83E+00	3.44E-02	3.44E-02	4.39E-01	-1.15E-01	1.79E-02	1.79E-02	*	1.81E-02	*	*		*
															-1.13E-01	-1.13E-01	3.60E-02	1.97E-02	1.95E-02	*	1.96E-02	-1.81E+00	3.60E-02	3.60E-02	4.44E-01	-1.13E-01	1.95E-02	1.95E-02	*	1.96E-02	*	*		*
															-1.12E-01	-1.12E-01	3.77E-02	2.13E-02	2.12E-02	*	2.12E-02	-1.79E+00	3.77E-02	3.77E-02	4.49E-01	-1.12E-01	2.12E-02	2.12E-02	*	2.12E-02	*	*		*
															-1.11E-01	-1.11E-01	3.94E-02	2.29E-02	2.29E-02	*	2.29E-02	-1.77E+00	3.94E-02	3.94E-02	4.54E-01	-1.11E-01	2.29E-02	2.29E-02	*	2.29E-02	*	*		*
															-1.09E-01	-1.09E-01	4.11E-02	2.46E-02	2.47E-02	*	2.47E-02	-1.74E+00	4.11E-02	4.11E-02	4.59E-01	-1.09E-01	2.47E-02	2.47E-02	*	2.47E-02	*	*		*
															-1.08E-01	-1.08E-01	4.29E-02	2.65E-02	2.66E-02	*	2.65E-02	-1.72E+00	4.29E-02	4.29E-02	4.64E-01	-1.08E-01	2.66E-02	2.66E-02	*	2.65E-02	*	*		*
															-1.07E-01	-1.07E-01	4.48E-02	2.84E-02	2.86E-02	*	2.85E-02	-1.70E+00	4.48E-02	4.48E-02	4.69E-01	-1.07E-01	2.86E-02	2.86E-02	*	2.85E-02	*	*		*
															-1.06E-01	-1.06E-01	4.68E-02	3.04E-02	3.08E-02	*	3.05E-02	-1.68E+00	4.68E-02	4.68E-02	4.74E-01	-1.06E-01	3.08E-02	3.08E-02	*	3.05E-02	*	*		*
															-1.04E-01	-1.04E-01	4.88E-02	3.25E-02	3.30E-02	*	3.27E-02	-1.66E+00	4.88E-02	4.88E-02	4.79E-01	-1.04E-01	3.30E-02	3.30E-02	*	3.27E-02	*	*		*
															-1.03E-01	-1.03E-01	5.09E-02	3.48E-02	3.53E-02	*	3.49E-02	-1.64E+00	5.09E-02	5.09E-02	4.85E-01	-1.03E-01	3.53E-02	3.53E-02	*	3.49E-02	*	*		*
															-1.02E-01	-1.02E-01	5.31E-02	3.71E-02	3.77E-02	*	3.72E-02	-1.62E+00	5.30E-02	5.31E-02	4.90E-01	-1.02E-01	3.77E-02	3.77E-02	*	3.72E-02	*	*		*
															-1.01E-01	-1.01E-01	5.53E-02	3.95E-02	4.02E-02	*	3.97E-02	-1.60E+00	5.53E-02	5.53E-02	4.95E-01	-1.01E-01	4.02E-02	4.02E-02	*	3.97E-02	*	*		*
															-9.93E-02	-9.93E-02	5.76E-02	4.20E-02	4.28E-02	*	4.22E-02	-1.58E+00	5.76E-02	5.76E-02	5.00E-01	-9.93E-02	4.28E-02	4.28E-02	*	4.22E-02	*	*		*
															-9.80E-02	-9.80E-02	6.00E-02	4.47E-02	4.55E-02	*	4.49E-02	-1.56E+00	6.00E-02	6.00E-02	5.05E-01	-9.80E-02	4.55E-02	4.55E-02	*	4.49E-02	*	*		*
															-9.68E-02	-9.68E-02	6.24E-02	4.74E-02	4.83E-02	*	4.76E-02	-1.54E+00	6.24E-02	6.24E-02	5.11E-01	-9.68E-02	4.83E-02	4.83E-02	*	4.76E-02	*	*		*
															-9.55E-02	-9.55E-02	6.50E-02	5.03E-02	5.13E-02	*	5.05E-02	-1.52E+00	6.49E-02	6.50E-02	5.16E-01	-9.55E-02	5.13E-02	5.13E-02	*	5.05E-02	*	*		*
															-9.42E-02	-9.42E-02	6.76E-02	5.32E-02	5.43E-02	*	5.35E-02	-1.50E+00	6.75E-02	6.76E-02	5.21E-01	-9.42E-02	5.43E-02	5.43E-02	*	5.35E-02	*	*		*
		*	=a												-9.29E-02	-9.29E-02	7.03E-02	5.63E-02	5.75E-02	*	5.66E-02	-1.48E+00	7.02E-02	7.03E-02	5.27E-01	-9.29E-02	5.75E-02	5.75E-02	*	5.66E-02	*	*		*
		*	=b												-9.17E-02	-9.17E-02	7.31E-02	5.95E-02	6.07E-02	*	5.98E-02	-1.46E+00	7.30E-02	7.31E-02	5.32E-01	-9.17E-02	6.07E-02	6.07E-02	*	5.98E-02	*	*		*
		*	=c												-9.04E-02	-9.04E-02	7.59E-02	6.28E-02	6.41E-02	*	6.31E-02	-1.44E+00	7.58E-02	7.59E-02	5.37E-01	-9.04E-02	6.41E-02	6.41E-02	*	6.31E-02	*	*		*
		*	=d												-8.91E-02	-8.91E-02	7.88E-02	6.62E-02	6.76E-02	*	6.65E-02	-1.42E+00	7.88E-02	7.88E-02	5.43E-01	-8.91E-02	6.76E-02	6.76E-02	*	6.65E-02	*	*		*
															-8.78E-02	-8.78E-02	8.19E-02	6.97E-02	7.11E-02	*	7.01E-02	-1.40E+00	8.18E-02	8.19E-02	5.48E-01	-8.78E-02	7.11E-02	7.11E-02	*	7.01E-02	*	*		*
										*					-8.66E-02	-8.66E-02	8.50E-02	7.34E-02	7.48E-02	*	7.37E-02	-1.38E+00	8.49E-02	8.50E-02	5.54E-01	-8.66E-02	7.48E-02	7.48E-02	*	7.37E-02	*	*		*
										#VALUE!					-8.53E-02	-8.53E-02	8.82E-02	7.71E-02	7.87E-02	*	7.75E-02	-1.36E+00	8.81E-02	8.82E-02	5.59E-01	-8.53E-02	7.87E-02	7.87E-02	*	7.75E-02	*	*		*
Minimum:			1	=N(Ri)						*	#VALUE!				-8.40E-02	-8.40E-02	9.15E-02	8.10E-02	8.26E-02	*	8.14E-02	-1.34E+00	9.14E-02	9.15E-02	5.65E-01	-8.40E-02	8.26E-02	8.26E-02	*	8.14E-02	*	*		*
0		#VALUE!	#VALUE!	=n						*	#VALUE!				-8.28E-02	-8.28E-02	9.48E-02	8.50E-02	8.66E-02	*	8.54E-02	-1.32E+00	9.47E-02	9.48E-02	5.70E-01	-8.28E-02	8.66E-02	8.66E-02	*	8.54E-02	*	*		*
					Gammaln	#VALUE!	exact f	P		Ri	P				-8.15E-02	-8.15E-02	9.83E-02	8.91E-02	9.08E-02	*	8.95E-02	-1.30E+00	9.82E-02	9.83E-02	5.76E-01	-8.15E-02	9.08E-02	9.08E-02	*	8.95E-02	*	*		*
#VALUE!	#VALUE!	#VALUE!	#VALUE!	Fisher exact	#VALUE!	#VALUE!	#VALUE!	#VALUE!	#VALUE!	#VALUE!	#VALUE!				-8.02E-02	-8.02E-02	1.02E-01	9.33E-02	9.50E-02	*	9.38E-02	-1.28E+00	1.02E-01	1.02E-01	5.81E-01	-8.02E-02	9.50E-02	9.50E-02	*	9.38E-02	*	*		*
#VALUE!	#VALUE!	#VALUE!	#VALUE!		#VALUE!	#VALUE!	#VALUE!	#VALUE!	#VALUE!	#VALUE!	#VALUE!				-7.89E-02	-7.89E-02	1.05E-01	9.77E-02	9.94E-02	*	9.81E-02	-1.25E+00	1.05E-01	1.05E-01	5.87E-01	-7.89E-02	9.94E-02	9.94E-02	*	9.81E-02	*	*		*
#VALUE!	#VALUE!	#VALUE!	#VALUE!		#VALUE!	#VALUE!	#VALUE!	#VALUE!	#VALUE!	#VALUE!	#VALUE!				-7.77E-02	-7.77E-02	1.09E-01	1.02E-01	1.04E-01	*	1.03E-01	-1.23E+00	1.09E-01	1.09E-01	5.93E-01	-7.77E-02	1.04E-01	1.04E-01	*	1.03E-01	*	*		*
#VALUE!	#VALUE!	#VALUE!	#VALUE!		#VALUE!	#VALUE!	#VALUE!	#VALUE!	#VALUE!	#VALUE!	#VALUE!				-7.64E-02	-7.64E-02	1.13E-01	1.07E-01	1.08E-01	*	1.07E-01	-1.21E+00	1.13E-01	1.13E-01	5.98E-01	-7.64E-02	1.08E-01	1.08E-01	*	1.07E-01	*	*		*
#VALUE!	#VALUE!	#VALUE!	#VALUE!		#VALUE!	#VALUE!	#VALUE!	#VALUE!	#VALUE!	#VALUE!	#VALUE!				-7.51E-02	-7.51E-02	1.17E-01	1.11E-01	1.13E-01	*	1.12E-01	-1.19E+00	1.17E-01	1.17E-01	6.04E-01	-7.51E-02	1.13E-01	1.13E-01	*	1.12E-01	*	*		*
#VALUE!	#VALUE!	#VALUE!	#VALUE!		#VALUE!	#VALUE!	#VALUE!	#VALUE!	#VALUE!	#VALUE!	#VALUE!				-7.39E-02	-7.39E-02	1.21E-01	1.16E-01	1.18E-01	*	1.17E-01	-1.17E+00	1.21E-01	1.21E-01	6.10E-01	-7.39E-02	1.18E-01	1.18E-01	*	1.17E-01	*	*		*
#VALUE!	#VALUE!	#VALUE!	#VALUE!		#VALUE!	#VALUE!	#VALUE!	#VALUE!	#VALUE!	#VALUE!	#VALUE!				-7.26E-02	-7.26E-02	1.25E-01	1.21E-01	1.23E-01	*	1.22E-01	-1.15E+00	1.25E-01	1.25E-01	6.16E-01	-7.26E-02	1.23E-01	1.23E-01	*	1.22E-01	*	*		*
#VALUE!	#VALUE!	#VALUE!	#VALUE!		#VALUE!	#VALUE!	#VALUE!	#VALUE!	#VALUE!	#VALUE!	#VALUE!				-7.13E-02	-7.13E-02	1.29E-01	1.26E-01	1.28E-01	*	1.27E-01	-1.13E+00	1.29E-01	1.29E-01	6.21E-01	-7.13E-02	1.28E-01	1.28E-01	*	1.27E-01	*	*		*
#VALUE!	#VALUE!	#VALUE!	#VALUE!		#VALUE!	#VALUE!	#VALUE!	#VALUE!	#VALUE!	#VALUE!	#VALUE!				-7.00E-02	-7.00E-02	1.34E-01	1.31E-01	1.33E-01	*	1.32E-01	-1.11E+00	1.33E-01	1.34E-01	6.27E-01	-7.00E-02	1.33E-01	1.33E-01	*	1.32E-01	*	*		*
#VALUE!	#VALUE!	#VALUE!	#VALUE!		#VALUE!	#VALUE!	#VALUE!	#VALUE!	#VALUE!	#VALUE!	#VALUE!				-6.88E-02	-6.88E-02	1.38E-01	1.37E-01	1.38E-01	*	1.37E-01	-1.09E+00	1.38E-01	1.38E-01	6.33E-01	-6.88E-02	1.38E-01	1.38E-01	*	1.37E-01	*	*		*
#VALUE!	#VALUE!	#VALUE!	#VALUE!		#VALUE!	#VALUE!	#VALUE!	#VALUE!	#VALUE!	#VALUE!	#VALUE!				-6.75E-02	-6.75E-02	1.43E-01	1.42E-01	1.44E-01	*	1.42E-01	-1.07E+00	1.42E-01	1.43E-01	6.39E-01	-6.75E-02	1.44E-01	1.44E-01	*	1.42E-01	*	*		*
#VALUE!	#VALUE!	#VALUE!	#VALUE!		#VALUE!	#VALUE!	#VALUE!	#VALUE!	#VALUE!	#VALUE!	#VALUE!				-6.62E-02	-6.62E-02	1.47E-01	1.47E-01	1.49E-01	*	1.48E-01	-1.05E+00	1.47E-01	1.47E-01	6.45E-01	-6.62E-02	1.49E-01	1.49E-01	*	1.48E-01	*	*		*
#VALUE!	#VALUE!	#VALUE!	#VALUE!		#VALUE!	#VALUE!	#VALUE!	#VALUE!	#VALUE!	#VALUE!	#VALUE!				-6.50E-02	-6.50E-02	1.52E-01	1.53E-01	1.55E-01	*	1.53E-01	-1.03E+00	1.52E-01	1.52E-01	6.51E-01	-6.50E-02	1.55E-01	1.55E-01	*	1.53E-01	*	*		*
#VALUE!	#VALUE!	#VALUE!	#VALUE!		#VALUE!	#VALUE!	#VALUE!	#VALUE!	#VALUE!	#VALUE!	#VALUE!				-6.37E-02	-6.37E-02	1.57E-01	1.59E-01	1.60E-01	*	1.59E-01	-1.01E+00	1.56E-01	1.57E-01	6.57E-01	-6.37E-02	1.60E-01	1.60E-01	*	1.59E-01	*	*		*
#VALUE!	#VALUE!	#VALUE!	#VALUE!		#VALUE!	#VALUE!	#VALUE!	#VALUE!	#VALUE!	#VALUE!	#VALUE!				-6.24E-02	-6.24E-02	1.62E-01	1.65E-01	1.66E-01	*	1.65E-01	-9.91E-01	1.61E-01	1.62E-01	6.63E-01	-6.24E-02	1.66E-01	1.66E-01	*	1.65E-01	*	*		*
#VALUE!	#VALUE!	#VALUE!	#VALUE!		#VALUE!	#VALUE!	#VALUE!	#VALUE!	#VALUE!	#VALUE!	#VALUE!				-6.11E-02	-6.11E-02	1.67E-01	1.70E-01	1.72E-01	*	1.71E-01	-9.71E-01	1.66E-01	1.67E-01	6.69E-01	-6.11E-02	1.72E-01	1.72E-01	*	1.71E-01	*	*		*
#VALUE!	#VALUE!	#VALUE!	#VALUE!		#VALUE!	#VALUE!	#VALUE!	#VALUE!	#VALUE!	#VALUE!	#VALUE!				-5.99E-02	-5.99E-02	1.72E-01	1.77E-01	1.78E-01	*	1.77E-01	-9.50E-01	1.71E-01	1.72E-01	6.75E-01	-5.99E-02	1.78E-01	1.78E-01	*	1.77E-01	*	*		*
#VALUE!	#VALUE!	#VALUE!	#VALUE!		#VALUE!	#VALUE!	#VALUE!	#VALUE!	#VALUE!	#VALUE!	#VALUE!				-5.86E-02	-5.86E-02	1.77E-01	1.83E-01	1.84E-01	*	1.83E-01	-9.30E-01	1.77E-01	1.77E-01	6.81E-01	-5.86E-02	1.84E-01	1.84E-01	*	1.83E-01	*	*		*
#VALUE!	#VALUE!	#VALUE!	#VALUE!		#VALUE!	#VALUE!	#VALUE!	#VALUE!	#VALUE!	#VALUE!	#VALUE!				-5.73E-02	-5.73E-02	1.82E-01	1.89E-01	1.90E-01	*	1.89E-01	-9.10E-01	1.82E-01	1.82E-01	6.87E-01	-5.73E-02	1.90E-01	1.90E-01	*	1.89E-01	*	*		*
#VALUE!	#VALUE!	#VALUE!	#VALUE!		#VALUE!	#VALUE!	#VALUE!	#VALUE!	#VALUE!	#VALUE!	#VALUE!				-5.61E-02	-5.61E-02	1.87E-01	1.95E-01	1.97E-01	*	1.95E-01	-8.90E-01	1.87E-01	1.87E-01	6.93E-01	-5.61E-02	1.97E-01	1.97E-01	*	1.95E-01	*	*		*
#VALUE!	#VALUE!	#VALUE!	#VALUE!		#VALUE!	#VALUE!	#VALUE!	#VALUE!	#VALUE!	#VALUE!	#VALUE!				-5.48E-02	-5.48E-02	1.93E-01	2.02E-01	2.03E-01	*	2.02E-01	-8.69E-01	1.93E-01	1.93E-01	6.99E-01	-5.48E-02	2.03E-01	2.03E-01	*	2.02E-01	*	*		*
#VALUE!	#VALUE!	#VALUE!	#VALUE!		#VALUE!	#VALUE!	#VALUE!	#VALUE!	#VALUE!	#VALUE!	#VALUE!				-5.35E-02	-5.35E-02	1.99E-01	2.08E-01	2.09E-01	*	2.08E-01	-8.49E-01	1.98E-01	1.99E-01	7.06E-01	-5.35E-02	2.09E-01	2.09E-01	*	2.08E-01	*	*		*
#VALUE!	#VALUE!	#VALUE!	#VALUE!		#VALUE!	#VALUE!	#VALUE!	#VALUE!	#VALUE!	#VALUE!	#VALUE!				-5.22E-02	-5.22E-02	2.04E-01	2.15E-01	2.16E-01	*	2.15E-01	-8.29E-01	2.04E-01	2.04E-01	7.12E-01	-5.22E-02	2.16E-01	2.16E-01	*	2.15E-01	*	*		*
#VALUE!	#VALUE!	#VALUE!	#VALUE!		#VALUE!	#VALUE!	#VALUE!	#VALUE!	#VALUE!	#VALUE!	#VALUE!				-5.10E-02	-5.10E-02	2.10E-01	2.21E-01	2.22E-01	*	2.22E-01	-8.09E-01	2.10E-01	2.10E-01	7.18E-01	-5.10E-02	2.22E-01	2.22E-01	*	2.22E-01	*	*		*
#VALUE!	#VALUE!	#VALUE!	#VALUE!		#VALUE!	#VALUE!	#VALUE!	#VALUE!	#VALUE!	#VALUE!	#VALUE!				-4.97E-02	-4.97E-02	2.16E-01	2.28E-01	2.29E-01	*	2.28E-01	-7.88E-01	2.16E-01	2.16E-01	7.24E-01	-4.97E-02	2.29E-01	2.29E-01	*	2.28E-01	*	*		*
#VALUE!	#VALUE!	#VALUE!	#VALUE!		#VALUE!	#VALUE!	#VALUE!	#VALUE!	#VALUE!	#VALUE!	#VALUE!				-4.84E-02	-4.84E-02	2.22E-01	2.35E-01	2.36E-01	*	2.35E-01	-7.68E-01	2.22E-01	2.22E-01	7.31E-01	-4.84E-02	2.36E-01	2.36E-01	*	2.35E-01	*	*		*
#VALUE!	#VALUE!	#VALUE!	#VALUE!		#VALUE!	#VALUE!	#VALUE!	#VALUE!	#VALUE!	#VALUE!	#VALUE!				-4.72E-02	-4.72E-02	2.28E-01	2.42E-01	2.43E-01	*	2.42E-01	-7.48E-01	2.28E-01	2.28E-01	7.37E-01	-4.72E-02	2.43E-01	2.43E-01	*	2.42E-01	*	*		*
#VALUE!	#VALUE!	#VALUE!	#VALUE!		#VALUE!	#VALUE!	#VALUE!	#VALUE!	#VALUE!	#VALUE!	#VALUE!				-4.59E-02	-4.59E-02	2.34E-01	2.49E-01	2.50E-01	*	2.49E-01	-7.28E-01	2.34E-01	2.34E-01	7.44E-01	-4.59E-02	2.50E-01	2.50E-01	*	2.49E-01	*	*		*
#VALUE!	#VALUE!	#VALUE!	#VALUE!		#VALUE!	#VALUE!	#VALUE!	#VALUE!	#VALUE!	#VALUE!	#VALUE!				-4.46E-02	-4.46E-02	2.40E-01	2.56E-01	2.57E-01	*	2.56E-01	-7.08E-01	2.40E-01	2.40E-01	7.50E-01	-4.46E-02	2.57E-01	2.57E-01	*	2.56E-01	*	*		*
#VALUE!	#VALUE!	#VALUE!	#VALUE!		#VALUE!	#VALUE!	#VALUE!	#VALUE!	#VALUE!	#VALUE!	#VALUE!				-4.33E-02	-4.33E-02	2.46E-01	2.63E-01	2.64E-01	*	2.63E-01	-6.87E-01	2.46E-01	2.46E-01	7.57E-01	-4.33E-02	2.64E-01	2.64E-01	*	2.63E-01	*	*		*
#VALUE!	#VALUE!	#VALUE!	#VALUE!		#VALUE!	#VALUE!	#VALUE!	#VALUE!	#VALUE!	#VALUE!	#VALUE!				-4.21E-02	-4.21E-02	2.53E-01	2.70E-01	2.71E-01	*	2.70E-01	-6.67E-01	2.53E-01	2.53E-01	7.63E-01	-4.21E-02	2.71E-01	2.71E-01	*	2.70E-01	*	*		*
#VALUE!	#VALUE!	#VALUE!	#VALUE!		#VALUE!	#VALUE!	#VALUE!	#VALUE!	#VALUE!	#VALUE!	#VALUE!				-4.08E-02	-4.08E-02	2.59E-01	2.78E-01	2.78E-01	*	2.78E-01	-6.47E-01	2.59E-01	2.59E-01	7.70E-01	-4.08E-02	2.78E-01	2.78E-01	*	2.78E-01	*	*		*
#VALUE!	#VALUE!	#VALUE!	#VALUE!		#VALUE!	#VALUE!	#VALUE!	#VALUE!	#VALUE!	#VALUE!	#VALUE!				-3.95E-02	-3.95E-02	2.66E-01	2.85E-01	2.85E-01	*	2.85E-01	-6.27E-01	2.66E-01	2.66E-01	7.76E-01	-3.95E-02	2.85E-01	2.85E-01	*	2.85E-01	*	*		*
#VALUE!	#VALUE!	#VALUE!	#VALUE!		#VALUE!	#VALUE!	#VALUE!	#VALUE!	#VALUE!	#VALUE!	#VALUE!				-3.83E-02	-3.83E-02	2.73E-01	2.92E-01	2.92E-01	*	2.92E-01	-6.07E-01	2.72E-01	2.73E-01	7.83E-01	-3.83E-02	2.92E-01	2.92E-01	*	2.92E-01	*	*		*
#VALUE!	#VALUE!	#VALUE!	#VALUE!		#VALUE!	#VALUE!	#VALUE!	#VALUE!	#VALUE!	#VALUE!	#VALUE!				-3.70E-02	-3.70E-02	2.79E-01	3.00E-01	3.00E-01	*	3.00E-01	-5.86E-01	2.79E-01	2.79E-01	7.90E-01	-3.70E-02	3.00E-01	3.00E-01	*	3.00E-01	*	*		*
#VALUE!	#VALUE!	#VALUE!	#VALUE!		#VALUE!	#VALUE!	#VALUE!	#VALUE!	#VALUE!	#VALUE!	#VALUE!				-3.57E-02	-3.57E-02	2.86E-01	3.07E-01	3.07E-01	*	3.07E-01	-5.66E-01	2.86E-01	2.86E-01	7.96E-01	-3.57E-02	3.07E-01	3.07E-01	*	3.07E-01	*	*		*
#VALUE!	#VALUE!	#VALUE!	#VALUE!		#VALUE!	#VALUE!	#VALUE!	#VALUE!	#VALUE!	#VALUE!	#VALUE!				-3.44E-02	-3.44E-02	2.93E-01	3.15E-01	3.15E-01	*	3.15E-01	-5.46E-01	2.93E-01	2.93E-01	8.03E-01	-3.44E-02	3.15E-01	3.15E-01	*	3.15E-01	*	*		*
#VALUE!	#VALUE!	#VALUE!	#VALUE!		#VALUE!	#VALUE!	#VALUE!	#VALUE!	#VALUE!	#VALUE!	#VALUE!				-3.32E-02	-3.32E-02	3.00E-01	3.22E-01	3.22E-01	*	3.22E-01	-5.26E-01	3.00E-01	3.00E-01	8.10E-01	-3.32E-02	3.22E-01	3.22E-01	*	3.22E-01	*	*		*
#VALUE!	#VALUE!	#VALUE!	#VALUE!		#VALUE!	#VALUE!	#VALUE!	#VALUE!	#VALUE!	#VALUE!	#VALUE!				-3.19E-02	-3.19E-02	3.07E-01	3.30E-01	3.30E-01	*	3.30E-01	-5.06E-01	3.07E-01	3.07E-01	8.17E-01	-3.19E-02	3.30E-01	3.30E-01	*	3.30E-01	*	*		*
#VALUE!	#VALUE!	#VALUE!	#VALUE!		#VALUE!	#VALUE!	#VALUE!	#VALUE!	#VALUE!	#VALUE!	#VALUE!				-3.06E-02	-3.06E-02	3.14E-01	3.38E-01	3.37E-01	*	3.38E-01	-4.85E-01	3.14E-01	3.14E-01	8.23E-01	-3.06E-02	3.37E-01	3.37E-01	*	3.38E-01	*	*		*
#VALUE!	#VALUE!	#VALUE!	#VALUE!		#VALUE!	#VALUE!	#VALUE!	#VALUE!	#VALUE!	#VALUE!	#VALUE!				-2.94E-02	-2.94E-02	3.21E-01	3.45E-01	3.45E-01	*	3.45E-01	-4.65E-01	3.21E-01	3.21E-01	8.30E-01	-2.94E-02	3.45E-01	3.45E-01	*	3.45E-01	*	*		*
#VALUE!	#VALUE!	#VALUE!	#VALUE!		#VALUE!	#VALUE!	#VALUE!	#VALUE!	#VALUE!	#VALUE!	#VALUE!				-2.81E-02	-2.81E-02	3.28E-01	3.53E-01	3.53E-01	*	3.53E-01	-4.45E-01	3.28E-01	3.28E-01	8.37E-01	-2.81E-02	3.53E-01	3.53E-01	*	3.53E-01	*	*		*
#VALUE!	#VALUE!	#VALUE!	#VALUE!		#VALUE!	#VALUE!	#VALUE!	#VALUE!	#VALUE!	#VALUE!	#VALUE!				-2.68E-02	-2.68E-02	3.36E-01	3.61E-01	3.61E-01	*	3.61E-01	-4.25E-01	3.36E-01	3.36E-01	8.44E-01	-2.68E-02	3.61E-01	3.61E-01	*	3.61E-01	*	*		*
#VALUE!	#VALUE!	#VALUE!	#VALUE!		#VALUE!	#VALUE!	#VALUE!	#VALUE!	#VALUE!	#VALUE!	#VALUE!				-2.55E-02	-2.55E-02	3.43E-01	3.69E-01	3.68E-01	*	3.69E-01	-4.05E-01	3.43E-01	3.43E-01	8.51E-01	-2.55E-02	3.68E-01	3.68E-01	*	3.69E-01	*	*		*
#VALUE!	#VALUE!	#VALUE!	#VALUE!		#VALUE!	#VALUE!	#VALUE!	#VALUE!	#VALUE!	#VALUE!	#VALUE!				-2.43E-02	-2.43E-02	3.51E-01	3.77E-01	3.76E-01	*	3.77E-01	-3.85E-01	3.50E-01	3.51E-01	8.58E-01	-2.43E-02	3.76E-01	3.76E-01	*	3.77E-01	*	*		*
#VALUE!	#VALUE!	#VALUE!	#VALUE!		#VALUE!	#VALUE!	#VALUE!	#VALUE!	#VALUE!	#VALUE!	#VALUE!				-2.30E-02	-2.30E-02	3.58E-01	3.85E-01	3.84E-01	*	3.84E-01	-3.64E-01	3.58E-01	3.58E-01	8.65E-01	-2.30E-02	3.84E-01	3.84E-01	*	3.84E-01	*	*		*
#VALUE!	#VALUE!	#VALUE!	#VALUE!		#VALUE!	#VALUE!	#VALUE!	#VALUE!	#VALUE!	#VALUE!	#VALUE!				-2.17E-02	-2.17E-02	3.66E-01	3.93E-01	3.92E-01	*	3.92E-01	-3.44E-01	3.65E-01	3.66E-01	8.72E-01	-2.17E-02	3.92E-01	3.92E-01	*	3.92E-01	*	*		*
#VALUE!	#VALUE!	#VALUE!	#VALUE!		#VALUE!	#VALUE!	#VALUE!	#VALUE!	#VALUE!	#VALUE!	#VALUE!				-2.05E-02	-2.05E-02	3.73E-01	4.00E-01	4.00E-01	*	4.00E-01	-3.24E-01	3.73E-01	3.73E-01	8.79E-01	-2.05E-02	4.00E-01	4.00E-01	*	4.00E-01	*	*		*
#VALUE!	#VALUE!	#VALUE!	#VALUE!		#VALUE!	#VALUE!	#VALUE!	#VALUE!	#VALUE!	#VALUE!	#VALUE!				-1.92E-02	-1.92E-02	3.81E-01	4.08E-01	4.07E-01	*	4.08E-01	-3.04E-01	3.81E-01	3.81E-01	8.87E-01	-1.92E-02	4.07E-01	4.07E-01	*	4.08E-01	*	*		*
#VALUE!	#VALUE!	#VALUE!	#VALUE!		#VALUE!	#VALUE!	#VALUE!	#VALUE!	#VALUE!	#VALUE!	#VALUE!				-1.79E-02	-1.79E-02	3.89E-01	4.16E-01	4.15E-01	*	4.16E-01	-2.84E-01	3.88E-01	3.89E-01	8.94E-01	-1.79E-02	4.15E-01	4.15E-01	*	4.16E-01	*	*		*
#VALUE!	#VALUE!	#VALUE!	#VALUE!		#VALUE!	#VALUE!	#VALUE!	#VALUE!	#VALUE!	#VALUE!	#VALUE!				-1.66E-02	-1.66E-02	3.96E-01	4.24E-01	4.23E-01	*	4.24E-01	-2.64E-01	3.96E-01	3.96E-01	9.01E-01	-1.66E-02	4.23E-01	4.23E-01	*	4.24E-01	*	*		*
#VALUE!	#VALUE!	#VALUE!	#VALUE!		#VALUE!	#VALUE!	#VALUE!	#VALUE!	#VALUE!	#VALUE!	#VALUE!				-1.54E-02	-1.54E-02	4.04E-01	4.32E-01	4.31E-01	*	4.32E-01	-2.43E-01	4.04E-01	4.04E-01	9.08E-01	-1.54E-02	4.31E-01	4.31E-01	*	4.32E-01	*	*		*
#VALUE!	#VALUE!	#VALUE!	#VALUE!		#VALUE!	#VALUE!	#VALUE!	#VALUE!	#VALUE!	#VALUE!	#VALUE!				-1.41E-02	-1.41E-02	4.12E-01	4.40E-01	4.39E-01	*	4.40E-01	-2.23E-01	4.12E-01	4.12E-01	9.16E-01	-1.41E-02	4.39E-01	4.39E-01	*	4.40E-01	*	*		*
#VALUE!	#VALUE!	#VALUE!	#VALUE!		#VALUE!	#VALUE!	#VALUE!	#VALUE!	#VALUE!	#VALUE!	#VALUE!				-1.28E-02	-1.28E-02	4.20E-01	4.48E-01	4.47E-01	*	4.48E-01	-2.03E-01	4.20E-01	4.20E-01	9.23E-01	-1.28E-02	4.47E-01	4.47E-01	*	4.48E-01	*	*		*
#VALUE!	#VALUE!	#VALUE!	#VALUE!		#VALUE!	#VALUE!	#VALUE!	#VALUE!	#VALUE!	#VALUE!	#VALUE!				-1.16E-02	-1.16E-02	4.28E-01	4.56E-01	4.55E-01	*	4.56E-01	-1.83E-01	4.27E-01	4.28E-01	9.31E-01	-1.16E-02	4.55E-01	4.55E-01	*	4.56E-01	*	*		*
#VALUE!	#VALUE!	#VALUE!	#VALUE!		#VALUE!	#VALUE!	#VALUE!	#VALUE!	#VALUE!	#VALUE!	#VALUE!				-1.03E-02	-1.03E-02	4.35E-01	4.64E-01	4.63E-01	*	4.64E-01	-1.63E-01	4.35E-01	4.35E-01	9.38E-01	-1.03E-02	4.63E-01	4.63E-01	*	4.64E-01	*	*		*
#VALUE!	#VALUE!	#VALUE!	#VALUE!		#VALUE!	#VALUE!	#VALUE!	#VALUE!	#VALUE!	#VALUE!	#VALUE!				-9.01E-03	-9.01E-03	4.43E-01	4.72E-01	4.71E-01	*	4.72E-01	-1.43E-01	4.43E-01	4.43E-01	9.46E-01	-9.01E-03	4.71E-01	4.71E-01	*	4.72E-01	*	*		*
#VALUE!	#VALUE!	#VALUE!	#VALUE!		#VALUE!	#VALUE!	#VALUE!	#VALUE!	#VALUE!	#VALUE!	#VALUE!				-7.74E-03	-7.74E-03	4.51E-01	4.80E-01	4.79E-01	*	4.80E-01	-1.23E-01	4.51E-01	4.51E-01	9.53E-01	-7.74E-03	4.79E-01	4.79E-01	*	4.80E-01	*	*		*
#VALUE!	#VALUE!	#VALUE!	#VALUE!		#VALUE!	#VALUE!	#VALUE!	#VALUE!	#VALUE!	#VALUE!	#VALUE!				-6.46E-03	-6.46E-03	4.59E-01	4.88E-01	4.86E-01	*	4.88E-01	-1.02E-01	4.59E-01	4.59E-01	9.61E-01	-6.46E-03	4.86E-01	4.86E-01	*	4.88E-01	*	*		*
#VALUE!	#VALUE!	#VALUE!	#VALUE!		#VALUE!	#VALUE!	#VALUE!	#VALUE!	#VALUE!	#VALUE!	#VALUE!				-5.19E-03	-5.19E-03	4.67E-01	4.96E-01	4.94E-01	*	4.95E-01	-8.23E-02	4.67E-01	4.67E-01	9.68E-01	-5.19E-03	4.94E-01	4.94E-01	*	4.95E-01	*	*		*
#VALUE!	#VALUE!	#VALUE!	#VALUE!		#VALUE!	#VALUE!	#VALUE!	#VALUE!	#VALUE!	#VALUE!	#VALUE!				-3.92E-03	-3.92E-03	4.75E-01	5.04E-01	5.02E-01	*	5.03E-01	-6.21E-02	4.75E-01	4.75E-01	9.76E-01	-3.92E-03	4.98E-01	4.98E-01	*	4.97E-01	*	*		*
#VALUE!	#VALUE!	#VALUE!	#VALUE!		#VALUE!	#VALUE!	#VALUE!	#VALUE!	#VALUE!	#VALUE!	#VALUE!				-2.65E-03	-2.65E-03	4.83E-01	5.12E-01	5.10E-01	*	5.11E-01	-4.20E-02	4.83E-01	4.83E-01	9.84E-01	-2.65E-03	4.90E-01	4.90E-01	*	4.89E-01	*	*		*
#VALUE!	#VALUE!	#VALUE!	#VALUE!		#VALUE!	#VALUE!	#VALUE!	#VALUE!	#VALUE!	#VALUE!	#VALUE!				-1.38E-03	-1.38E-03	4.91E-01	5.19E-01	5.18E-01	*	5.19E-01	-2.18E-02	4.91E-01	4.91E-01	9.92E-01	-1.38E-03	4.82E-01	4.82E-01	*	4.81E-01	*	*		*
#VALUE!	#VALUE!	#VALUE!	#VALUE!		#VALUE!	#VALUE!	#VALUE!	#VALUE!	#VALUE!	#VALUE!	#VALUE!				-1.06E-04	-1.06E-04	4.99E-01	5.27E-01	5.26E-01	*	5.27E-01	-1.68E-03	4.99E-01	4.99E-01	9.99E-01	-1.06E-04	4.74E-01	4.74E-01	*	4.73E-01	*	*		*
#VALUE!	#VALUE!	#VALUE!	#VALUE!		#VALUE!	#VALUE!	#VALUE!	#VALUE!	#VALUE!	#VALUE!	#VALUE!				1.17E-03	1.17E-03	5.07E-01	5.35E-01	5.33E-01	*	5.34E-01	1.85E-02	5.07E-01	5.07E-01	1.01E+00	1.17E-03	4.67E-01	4.67E-01	*	4.66E-01	*	*		*
#VALUE!	#VALUE!	#VALUE!	#VALUE!		#VALUE!	#VALUE!	#VALUE!	#VALUE!	#VALUE!	#VALUE!	#VALUE!				2.44E-03	2.44E-03	5.15E-01	5.43E-01	5.41E-01	*	5.42E-01	3.86E-02	5.15E-01	5.15E-01	1.02E+00	2.44E-03	4.59E-01	4.59E-01	*	4.58E-01	*	*		*
#VALUE!	#VALUE!	#VALUE!	#VALUE!		#VALUE!	#VALUE!	#VALUE!	#VALUE!	#VALUE!	#VALUE!	#VALUE!				3.71E-03	3.71E-03	5.23E-01	5.50E-01	5.49E-01	*	5.50E-01	5.88E-02	5.23E-01	5.23E-01	1.02E+00	3.71E-03	4.51E-01	4.51E-01	*	4.50E-01	*	*		*
#VALUE!	#VALUE!	#VALUE!	#VALUE!		#VALUE!	#VALUE!	#VALUE!	#VALUE!	#VALUE!	#VALUE!	#VALUE!				4.98E-03	4.98E-03	5.31E-01	5.58E-01	5.56E-01	*	5.58E-01	7.89E-02	5.31E-01	5.31E-01	1.03E+00	4.98E-03	4.44E-01	4.44E-01	*	4.42E-01	*	*		*
#VALUE!	#VALUE!	#VALUE!	#VALUE!		#VALUE!	#VALUE!	#VALUE!	#VALUE!	#VALUE!	#VALUE!	#VALUE!				6.25E-03	6.25E-03	5.39E-01	5.66E-01	5.64E-01	*	5.65E-01	9.91E-02	5.39E-01	5.39E-01	1.04E+00	6.25E-03	4.36E-01	4.36E-01	*	4.35E-01	*	*		*
#VALUE!	#VALUE!	#VALUE!	#VALUE!		#VALUE!	#VALUE!	#VALUE!	#VALUE!	#VALUE!	#VALUE!	#VALUE!				7.52E-03	7.52E-03	5.47E-01	5.73E-01	5.72E-01	*	5.73E-01	1.19E-01	5.47E-01	5.47E-01	1.05E+00	7.52E-03	4.28E-01	4.28E-01	*	4.27E-01	*	*		*
#VALUE!	#VALUE!	#VALUE!	#VALUE!		#VALUE!	#VALUE!	#VALUE!	#VALUE!	#VALUE!	#VALUE!	#VALUE!				8.80E-03	8.80E-03	5.55E-01	5.81E-01	5.79E-01	*	5.80E-01	1.39E-01	5.55E-01	5.55E-01	1.06E+00	8.80E-03	4.21E-01	4.21E-01	*	4.20E-01	*	*		*
#VALUE!	#VALUE!	#VALUE!	#VALUE!		#VALUE!	#VALUE!	#VALUE!	#VALUE!	#VALUE!	#VALUE!	#VALUE!				1.01E-02	1.01E-02	5.63E-01	5.88E-01	5.87E-01	*	5.88E-01	1.59E-01	5.63E-01	5.63E-01	1.06E+00	1.01E-02	4.13E-01	4.13E-01	*	4.12E-01	*	*		*
#VALUE!	#VALUE!	#VALUE!	#VALUE!		#VALUE!	#VALUE!	#VALUE!	#VALUE!	#VALUE!	#VALUE!	#VALUE!				1.13E-02	1.13E-02	5.71E-01	5.96E-01	5.94E-01	*	5.95E-01	1.80E-01	5.71E-01	5.71E-01	1.07E+00	1.13E-02	4.06E-01	4.06E-01	*	4.05E-01	*	*		*
#VALUE!	#VALUE!	#VALUE!	#VALUE!		#VALUE!	#VALUE!	#VALUE!	#VALUE!	#VALUE!	#VALUE!	#VALUE!				1.26E-02	1.26E-02	5.79E-01	6.03E-01	6.01E-01	*	6.03E-01	2.00E-01	5.79E-01	5.79E-01	1.08E+00	1.26E-02	3.99E-01	3.99E-01	*	3.97E-01	*	*		*
#VALUE!	#VALUE!	#VALUE!	#VALUE!		#VALUE!	#VALUE!	#VALUE!	#VALUE!	#VALUE!	#VALUE!	#VALUE!				1.39E-02	1.39E-02	5.87E-01	6.10E-01	6.09E-01	*	6.10E-01	2.20E-01	5.87E-01	5.87E-01	1.09E+00	1.39E-02	3.91E-01	3.91E-01	*	3.90E-01	*	*		*
#VALUE!	#VALUE!	#VALUE!	#VALUE!		#VALUE!	#VALUE!	#VALUE!	#VALUE!	#VALUE!	#VALUE!	#VALUE!				1.52E-02	1.52E-02	5.95E-01	6.17E-01	6.16E-01	*	6.17E-01	2.40E-01	5.95E-01	5.95E-01	1.10E+00	1.52E-02	3.84E-01	3.84E-01	*	3.83E-01	*	*		*
#VALUE!	#VALUE!	#VALUE!	#VALUE!		#VALUE!	#VALUE!	#VALUE!	#VALUE!	#VALUE!	#VALUE!	#VALUE!				1.64E-02	1.64E-02	6.02E-01	6.25E-01	6.23E-01	*	6.24E-01	2.60E-01	6.03E-01	6.02E-01	1.11E+00	1.64E-02	3.77E-01	3.77E-01	*	3.76E-01	*	*		*
#VALUE!	#VALUE!	#VALUE!	#VALUE!		#VALUE!	#VALUE!	#VALUE!	#VALUE!	#VALUE!	#VALUE!	#VALUE!				1.77E-02	1.77E-02	6.10E-01	6.32E-01	6.30E-01	*	6.31E-01	2.80E-01	6.10E-01	6.10E-01	1.11E+00	1.77E-02	3.70E-01	3.70E-01	*	3.69E-01	*	*		*
#VALUE!	#VALUE!	#VALUE!	#VALUE!		#VALUE!	#VALUE!	#VALUE!	#VALUE!	#VALUE!	#VALUE!	#VALUE!				1.90E-02	1.90E-02	6.18E-01	6.39E-01	6.37E-01	*	6.39E-01	3.01E-01	6.18E-01	6.18E-01	1.12E+00	1.90E-02	3.63E-01	3.63E-01	*	3.61E-01	*	*		*
#VALUE!	#VALUE!	#VALUE!	#VALUE!		#VALUE!	#VALUE!	#VALUE!	#VALUE!	#VALUE!	#VALUE!	#VALUE!				2.02E-02	2.02E-02	6.26E-01	6.46E-01	6.45E-01	*	6.46E-01	3.21E-01	6.26E-01	6.26E-01	1.13E+00	2.02E-02	3.55E-01	3.55E-01	*	3.54E-01	*	*		*
#VALUE!	#VALUE!	#VALUE!	#VALUE!		#VALUE!	#VALUE!	#VALUE!	#VALUE!	#VALUE!	#VALUE!	#VALUE!				2.15E-02	2.15E-02	6.33E-01	6.53E-01	6.52E-01	*	6.53E-01	3.41E-01	6.33E-01	6.33E-01	1.14E+00	2.15E-02	3.48E-01	3.48E-01	*	3.47E-01	*	*		*
#VALUE!	#VALUE!	#VALUE!	#VALUE!		#VALUE!	#VALUE!	#VALUE!	#VALUE!	#VALUE!	#VALUE!	#VALUE!				2.28E-02	2.28E-02	6.41E-01	6.60E-01	6.58E-01	*	6.59E-01	3.61E-01	6.41E-01	6.41E-01	1.15E+00	2.28E-02	3.42E-01	3.42E-01	*	3.41E-01	*	*		*
#VALUE!	#VALUE!	#VALUE!	#VALUE!		#VALUE!	#VALUE!	#VALUE!	#VALUE!	#VALUE!	#VALUE!	#VALUE!				2.41E-02	2.41E-02	6.48E-01	6.67E-01	6.65E-01	*	6.66E-01	3.81E-01	6.48E-01	6.48E-01	1.16E+00	2.41E-02	3.35E-01	3.35E-01	*	3.34E-01	*	*		*
#VALUE!	#VALUE!	#VALUE!	#VALUE!		#VALUE!	#VALUE!	#VALUE!	#VALUE!	#VALUE!	#VALUE!	#VALUE!				2.53E-02	2.53E-02	6.56E-01	6.73E-01	6.72E-01	*	6.73E-01	4.01E-01	6.56E-01	6.56E-01	1.17E+00	2.53E-02	3.28E-01	3.28E-01	*	3.27E-01	*	*		*
#VALUE!	#VALUE!	#VALUE!	#VALUE!		#VALUE!	#VALUE!	#VALUE!	#VALUE!	#VALUE!	#VALUE!	#VALUE!				2.66E-02	2.66E-02	6.63E-01	6.80E-01	6.79E-01	*	6.80E-01	4.22E-01	6.63E-01	6.63E-01	1.17E+00	2.66E-02	3.21E-01	3.21E-01	*	3.20E-01	*	*		*
#VALUE!	#VALUE!	#VALUE!	#VALUE!		#VALUE!	#VALUE!	#VALUE!	#VALUE!	#VALUE!	#VALUE!	#VALUE!				2.79E-02	2.79E-02	6.70E-01	6.87E-01	6.85E-01	*	6.86E-01	4.42E-01	6.70E-01	6.70E-01	1.18E+00	2.79E-02	3.15E-01	3.15E-01	*	3.14E-01	*	*		*
#VALUE!	#VALUE!	#VALUE!	#VALUE!		#VALUE!	#VALUE!	#VALUE!	#VALUE!	#VALUE!	#VALUE!	#VALUE!				2.91E-02	2.91E-02	6.78E-01	6.93E-01	6.92E-01	*	6.93E-01	4.62E-01	6.78E-01	6.78E-01	1.19E+00	2.91E-02	3.08E-01	3.08E-01	*	3.07E-01	*	*		*
#VALUE!	#VALUE!	#VALUE!	#VALUE!		#VALUE!	#VALUE!	#VALUE!	#VALUE!	#VALUE!	#VALUE!	#VALUE!				3.04E-02	3.04E-02	6.85E-01	7.00E-01	6.99E-01	*	6.99E-01	4.82E-01	6.85E-01	6.85E-01	1.20E+00	3.04E-02	3.01E-01	3.01E-01	*	3.01E-01	*	*		*
#VALUE!	#VALUE!	#VALUE!	#VALUE!		#VALUE!	#VALUE!	#VALUE!	#VALUE!	#VALUE!	#VALUE!	#VALUE!				3.17E-02	3.17E-02	6.92E-01	7.06E-01	7.05E-01	*	7.06E-01	5.02E-01	6.92E-01	6.92E-01	1.21E+00	3.17E-02	2.95E-01	2.95E-01	*	2.94E-01	*	*		*
#VALUE!	#VALUE!	#VALUE!	#VALUE!		#VALUE!	#VALUE!	#VALUE!	#VALUE!	#VALUE!	#VALUE!	#VALUE!				3.30E-02	3.30E-02	6.99E-01	7.12E-01	7.11E-01	*	7.12E-01	5.22E-01	6.99E-01	6.99E-01	1.22E+00	3.30E-02	2.89E-01	2.89E-01	*	2.88E-01	*	*		*
#VALUE!	#VALUE!	#VALUE!	#VALUE!		#VALUE!	#VALUE!	#VALUE!	#VALUE!	#VALUE!	#VALUE!	#VALUE!				3.42E-02	3.42E-02	7.06E-01	7.19E-01	7.18E-01	*	7.18E-01	5.43E-01	7.06E-01	7.06E-01	1.23E+00	3.42E-02	2.82E-01	2.82E-01	*	2.82E-01	*	*		*
#VALUE!	#VALUE!	#VALUE!	#VALUE!		#VALUE!	#VALUE!	#VALUE!	#VALUE!	#VALUE!	#VALUE!	#VALUE!				3.55E-02	3.55E-02	7.13E-01	7.25E-01	7.24E-01	*	7.25E-01	5.63E-01	7.13E-01	7.13E-01	1.24E+00	3.55E-02	2.76E-01	2.76E-01	*	2.75E-01	*	*		*
#VALUE!	#VALUE!	#VALUE!	#VALUE!		#VALUE!	#VALUE!	#VALUE!	#VALUE!	#VALUE!	#VALUE!	#VALUE!				3.68E-02	3.68E-02	7.20E-01	7.31E-01	7.30E-01	*	7.31E-01	5.83E-01	7.20E-01	7.20E-01	1.25E+00	3.68E-02	2.70E-01	2.70E-01	*	2.69E-01	*	*		*
#VALUE!	#VALUE!	#VALUE!	#VALUE!		#VALUE!	#VALUE!	#VALUE!	#VALUE!	#VALUE!	#VALUE!	#VALUE!				3.80E-02	3.80E-02	7.26E-01	7.37E-01	7.36E-01	*	7.37E-01	6.03E-01	7.27E-01	7.26E-01	1.26E+00	3.80E-02	2.64E-01	2.64E-01	*	2.63E-01	*	*		*
#VALUE!	#VALUE!	#VALUE!	#VALUE!		#VALUE!	#VALUE!	#VALUE!	#VALUE!	#VALUE!	#VALUE!	#VALUE!				3.93E-02	3.93E-02	7.33E-01	7.43E-01	7.42E-01	*	7.43E-01	6.23E-01	7.33E-01	7.33E-01	1.27E+00	3.93E-02	2.58E-01	2.58E-01	*	2.57E-01	*	*		*
#VALUE!	#VALUE!	#VALUE!	#VALUE!		#VALUE!	#VALUE!	#VALUE!	#VALUE!	#VALUE!	#VALUE!	#VALUE!				4.06E-02	4.06E-02	7.40E-01	7.49E-01	7.48E-01	*	7.48E-01	6.44E-01	7.40E-01	7.40E-01	1.28E+00	4.06E-02	2.52E-01	2.52E-01	*	2.52E-01	*	*		*
#VALUE!	#VALUE!	#VALUE!	#VALUE!		#VALUE!	#VALUE!	#VALUE!	#VALUE!	#VALUE!	#VALUE!	#VALUE!				4.19E-02	4.19E-02	7.46E-01	7.54E-01	7.54E-01	*	7.54E-01	6.64E-01	7.46E-01	7.46E-01	1.29E+00	4.19E-02	2.46E-01	2.46E-01	*	2.46E-01	*	*		*
#VALUE!	#VALUE!	#VALUE!	#VALUE!		#VALUE!	#VALUE!	#VALUE!	#VALUE!	#VALUE!	#VALUE!	#VALUE!				4.31E-02	4.31E-02	7.52E-01	7.60E-01	7.59E-01	*	7.60E-01	6.84E-01	7.53E-01	7.52E-01	1.29E+00	4.31E-02	2.41E-01	2.41E-01	*	2.40E-01	*	*		*
#VALUE!	#VALUE!	#VALUE!	#VALUE!		#VALUE!	#VALUE!	#VALUE!	#VALUE!	#VALUE!	#VALUE!	#VALUE!				4.44E-02	4.44E-02	7.59E-01	7.66E-01	7.65E-01	*	7.66E-01	7.04E-01	7.59E-01	7.59E-01	1.30E+00	4.44E-02	2.35E-01	2.35E-01	*	2.34E-01	*	*		*
#VALUE!	#VALUE!	#VALUE!	#VALUE!		#VALUE!	#VALUE!	#VALUE!	#VALUE!	#VALUE!	#VALUE!	#VALUE!				4.57E-02	4.57E-02	7.65E-01	7.71E-01	7.71E-01	*	7.71E-01	7.24E-01	7.65E-01	7.65E-01	1.31E+00	4.57E-02	2.29E-01	2.29E-01	*	2.29E-01	*	*		*
#VALUE!	#VALUE!	#VALUE!	#VALUE!		#VALUE!	#VALUE!	#VALUE!	#VALUE!	#VALUE!	#VALUE!	#VALUE!				4.69E-02	4.69E-02	7.71E-01	7.77E-01	7.76E-01	*	7.76E-01	7.45E-01	7.71E-01	7.71E-01	1.32E+00	4.69E-02	2.24E-01	2.24E-01	*	2.24E-01	*	*		*
#VALUE!	#VALUE!	#VALUE!	#VALUE!		#VALUE!	#VALUE!	#VALUE!	#VALUE!	#VALUE!	#VALUE!	#VALUE!				4.82E-02	4.82E-02	7.77E-01	7.82E-01	7.82E-01	*	7.82E-01	7.65E-01	7.77E-01	7.77E-01	1.33E+00	4.82E-02	2.18E-01	2.18E-01	*	2.18E-01	*	*		*
#VALUE!	#VALUE!	#VALUE!	#VALUE!		#VALUE!	#VALUE!	#VALUE!	#VALUE!	#VALUE!	#VALUE!	#VALUE!				4.95E-02	4.95E-02	7.83E-01	7.87E-01	7.87E-01	*	7.87E-01	7.85E-01	7.83E-01	7.83E-01	1.34E+00	4.95E-02	2.13E-01	2.13E-01	*	2.13E-01	*	*		*
#VALUE!	#VALUE!	#VALUE!	#VALUE!		#VALUE!	#VALUE!	#VALUE!	#VALUE!	#VALUE!	#VALUE!	#VALUE!				5.08E-02	5.08E-02	7.89E-01	7.92E-01	7.92E-01	*	7.92E-01	8.05E-01	7.89E-01	7.89E-01	1.35E+00	5.08E-02	2.08E-01	2.08E-01	*	2.08E-01	*	*		*
#VALUE!	#VALUE!	#VALUE!	#VALUE!		#VALUE!	#VALUE!	#VALUE!	#VALUE!	#VALUE!	#VALUE!	#VALUE!				5.20E-02	5.20E-02	7.95E-01	7.98E-01	7.97E-01	*	7.97E-01	8.25E-01	7.95E-01	7.95E-01	1.36E+00	5.20E-02	2.03E-01	2.03E-01	*	2.03E-01	*	*		*
#VALUE!	#VALUE!	#VALUE!	#VALUE!		#VALUE!	#VALUE!	#VALUE!	#VALUE!	#VALUE!	#VALUE!	#VALUE!				5.33E-02	5.33E-02	8.01E-01	8.03E-01	8.02E-01	*	8.02E-01	8.46E-01	8.01E-01	8.01E-01	1.37E+00	5.33E-02	1.98E-01	1.98E-01	*	1.98E-01	*	*		*
#VALUE!	#VALUE!	#VALUE!	#VALUE!		#VALUE!	#VALUE!	#VALUE!	#VALUE!	#VALUE!	#VALUE!	#VALUE!				5.46E-02	5.46E-02	8.06E-01	8.07E-01	8.07E-01	*	8.07E-01	8.66E-01	8.06E-01	8.06E-01	1.38E+00	5.46E-02	1.93E-01	1.93E-01	*	1.93E-01	*	*		*
#VALUE!	#VALUE!	#VALUE!	#VALUE!		#VALUE!	#VALUE!	#VALUE!	#VALUE!	#VALUE!	#VALUE!	#VALUE!				5.58E-02	5.58E-02	8.12E-01	8.12E-01	8.12E-01	*	8.12E-01	8.86E-01	8.12E-01	8.12E-01	1.39E+00	5.58E-02	1.88E-01	1.88E-01	*	1.88E-01	*	*		*
#VALUE!	#VALUE!	#VALUE!	#VALUE!		#VALUE!	#VALUE!	#VALUE!	#VALUE!	#VALUE!	#VALUE!	#VALUE!				5.71E-02	5.71E-02	8.17E-01	8.17E-01	8.17E-01	*	8.17E-01	9.06E-01	8.17E-01	8.17E-01	1.40E+00	5.71E-02	1.83E-01	1.83E-01	*	1.83E-01	*	*		*
#VALUE!	#VALUE!	#VALUE!	#VALUE!		#VALUE!	#VALUE!	#VALUE!	#VALUE!	#VALUE!	#VALUE!	#VALUE!				5.84E-02	5.84E-02	8.22E-01	8.22E-01	8.22E-01	*	8.22E-01	9.27E-01	8.22E-01	8.22E-01	1.42E+00	5.84E-02	1.78E-01	1.78E-01	*	1.78E-01	*	*		*
#VALUE!	#VALUE!	#VALUE!	#VALUE!		#VALUE!	#VALUE!	#VALUE!	#VALUE!	#VALUE!	#VALUE!	#VALUE!				5.97E-02	5.97E-02	8.28E-01	8.26E-01	8.26E-01	*	8.26E-01	9.47E-01	8.28E-01	8.28E-01	1.43E+00	5.97E-02	1.74E-01	1.74E-01	*	1.74E-01	*	*		*
#VALUE!	#VALUE!	#VALUE!	#VALUE!		#VALUE!	#VALUE!	#VALUE!	#VALUE!	#VALUE!	#VALUE!	#VALUE!				6.09E-02	6.09E-02	8.33E-01	8.31E-01	8.31E-01	*	8.31E-01	9.67E-01	8.33E-01	8.33E-01	1.44E+00	6.09E-02	1.69E-01	1.69E-01	*	1.69E-01	*	*		*
#VALUE!	#VALUE!	#VALUE!	#VALUE!		#VALUE!	#VALUE!	#VALUE!	#VALUE!	#VALUE!	#VALUE!	#VALUE!				6.22E-02	6.22E-02	8.38E-01	8.35E-01	8.35E-01	*	8.35E-01	9.87E-01	8.38E-01	8.38E-01	1.45E+00	6.22E-02	1.65E-01	1.65E-01	*	1.65E-01	*	*		*
#VALUE!	#VALUE!	#VALUE!	#VALUE!		#VALUE!	#VALUE!	#VALUE!	#VALUE!	#VALUE!	#VALUE!	#VALUE!				6.35E-02	6.35E-02	8.43E-01	8.40E-01	8.40E-01	*	8.40E-01	1.01E+00	8.43E-01	8.43E-01	1.46E+00	6.35E-02	1.60E-01	1.60E-01	*	1.60E-01	*	*		*
#VALUE!	#VALUE!	#VALUE!	#VALUE!		#VALUE!	#VALUE!	#VALUE!	#VALUE!	#VALUE!	#VALUE!	#VALUE!				6.47E-02	6.47E-02	8.47E-01	8.44E-01	8.44E-01	*	8.44E-01	1.03E+00	8.48E-01	8.47E-01	1.47E+00	6.47E-02	1.56E-01	1.56E-01	*	1.56E-01	*	*		*
#VALUE!	#VALUE!	#VALUE!	#VALUE!		#VALUE!	#VALUE!	#VALUE!	#VALUE!	#VALUE!	#VALUE!	#VALUE!				6.60E-02	6.60E-02	8.52E-01	8.48E-01	8.48E-01	*	8.48E-01	1.05E+00	8.52E-01	8.52E-01	1.48E+00	6.60E-02	1.52E-01	1.52E-01	*	1.52E-01	*	*		*
#VALUE!	#VALUE!	#VALUE!	#VALUE!		#VALUE!	#VALUE!	#VALUE!	#VALUE!	#VALUE!	#VALUE!	#VALUE!				6.73E-02	6.73E-02	8.57E-01	8.52E-01	8.53E-01	*	8.52E-01	1.07E+00	8.57E-01	8.57E-01	1.49E+00	6.73E-02	1.47E-01	1.47E-01	*	1.48E-01	*	*		*
#VALUE!	#VALUE!	#VALUE!	#VALUE!		#VALUE!	#VALUE!	#VALUE!	#VALUE!	#VALUE!	#VALUE!	#VALUE!				6.86E-02	6.86E-02	8.61E-01	8.56E-01	8.57E-01	*	8.56E-01	1.09E+00	8.61E-01	8.61E-01	1.50E+00	6.86E-02	1.43E-01	1.43E-01	*	1.44E-01	*	*		*
#VALUE!	#VALUE!	#VALUE!	#VALUE!		#VALUE!	#VALUE!	#VALUE!	#VALUE!	#VALUE!	#VALUE!	#VALUE!				6.98E-02	6.98E-02	8.66E-01	8.60E-01	8.61E-01	*	8.60E-01	1.11E+00	8.66E-01	8.66E-01	1.51E+00	6.98E-02	1.39E-01	1.39E-01	*	1.40E-01	*	*		*
#VALUE!	#VALUE!	#VALUE!	#VALUE!		#VALUE!	#VALUE!	#VALUE!	#VALUE!	#VALUE!	#VALUE!	#VALUE!				7.11E-02	7.11E-02	8.70E-01	8.64E-01	8.65E-01	*	8.64E-01	1.13E+00	8.70E-01	8.70E-01	1.52E+00	7.11E-02	1.35E-01	1.35E-01	*	1.36E-01	*	*		*
#VALUE!	#VALUE!	#VALUE!	#VALUE!		#VALUE!	#VALUE!	#VALUE!	#VALUE!	#VALUE!	#VALUE!	#VALUE!				7.24E-02	7.24E-02	8.74E-01	8.68E-01	8.68E-01	*	8.68E-01	1.15E+00	8.74E-01	8.74E-01	1.53E+00	7.24E-02	1.32E-01	1.32E-01	*	1.32E-01	*	*		*
#VALUE!	#VALUE!	#VALUE!	#VALUE!		#VALUE!	#VALUE!	#VALUE!	#VALUE!	#VALUE!	#VALUE!	#VALUE!				7.36E-02	7.36E-02	8.78E-01	8.72E-01	8.72E-01	*	8.72E-01	1.17E+00	8.78E-01	8.78E-01	1.55E+00	7.36E-02	1.28E-01	1.28E-01	*	1.28E-01	*	*		*
#VALUE!	#VALUE!	#VALUE!	#VALUE!		#VALUE!	#VALUE!	#VALUE!	#VALUE!	#VALUE!	#VALUE!	#VALUE!				7.49E-02	7.49E-02	8.82E-01	8.75E-01	8.76E-01	*	8.75E-01	1.19E+00	8.82E-01	8.82E-01	1.56E+00	7.49E-02	1.24E-01	1.24E-01	*	1.25E-01	*	*		*
#VALUE!	#VALUE!	#VALUE!	#VALUE!		#VALUE!	#VALUE!	#VALUE!	#VALUE!	#VALUE!	#VALUE!	#VALUE!				7.62E-02	7.62E-02	8.86E-01	8.79E-01	8.79E-01	*	8.79E-01	1.21E+00	8.86E-01	8.86E-01	1.57E+00	7.62E-02	1.21E-01	1.21E-01	*	1.21E-01	*	*		*
#VALUE!	#VALUE!	#VALUE!	#VALUE!		#VALUE!	#VALUE!	#VALUE!	#VALUE!	#VALUE!	#VALUE!	#VALUE!				7.75E-02	7.75E-02	8.90E-01	8.82E-01	8.83E-01	*	8.83E-01	1.23E+00	8.90E-01	8.90E-01	1.58E+00	7.75E-02	1.17E-01	1.17E-01	*	1.17E-01	*	*		*
#VALUE!	#VALUE!	#VALUE!	#VALUE!		#VALUE!	#VALUE!	#VALUE!	#VALUE!	#VALUE!	#VALUE!	#VALUE!				7.87E-02	7.87E-02	8.94E-01	8.86E-01	8.86E-01	*	8.86E-01	1.25E+00	8.94E-01	8.94E-01	1.59E+00	7.87E-02	1.14E-01	1.14E-01	*	1.14E-01	*	*		*
#VALUE!	#VALUE!	#VALUE!	#VALUE!		#VALUE!	#VALUE!	#VALUE!	#VALUE!	#VALUE!	#VALUE!	#VALUE!				8.00E-02	8.00E-02	8.98E-01	8.89E-01	8.90E-01	*	8.89E-01	1.27E+00	8.98E-01	8.98E-01	1.60E+00	8.00E-02	1.10E-01	1.10E-01	*	1.11E-01	*	*		*
#VALUE!	#VALUE!	#VALUE!	#VALUE!		#VALUE!	#VALUE!	#VALUE!	#VALUE!	#VALUE!	#VALUE!	#VALUE!				8.13E-02	8.13E-02	9.01E-01	8.92E-01	8.93E-01	*	8.93E-01	1.29E+00	9.01E-01	9.01E-01	1.61E+00	8.13E-02	1.07E-01	1.07E-01	*	1.07E-01	*	*		*
#VALUE!	#VALUE!	#VALUE!	#VALUE!		#VALUE!	#VALUE!	#VALUE!	#VALUE!	#VALUE!	#VALUE!	#VALUE!				8.26E-02	8.26E-02	9.05E-01	8.96E-01	8.96E-01	*	8.96E-01	1.31E+00	9.05E-01	9.05E-01	1.63E+00	8.26E-02	1.04E-01	1.04E-01	*	1.04E-01	*	*		*
#VALUE!	#VALUE!	#VALUE!	#VALUE!		#VALUE!	#VALUE!	#VALUE!	#VALUE!	#VALUE!	#VALUE!	#VALUE!				8.38E-02	8.38E-02	9.08E-01	8.99E-01	8.99E-01	*	8.99E-01	1.33E+00	9.08E-01	9.08E-01	1.64E+00	8.38E-02	1.01E-01	1.01E-01	*	1.01E-01	*	*		*
#VALUE!	#VALUE!	#VALUE!	#VALUE!		#VALUE!	#VALUE!	#VALUE!	#VALUE!	#VALUE!	#VALUE!	#VALUE!				8.51E-02	8.51E-02	9.11E-01	9.02E-01	9.02E-01	*	9.02E-01	1.35E+00	9.11E-01	9.11E-01	1.65E+00	8.51E-02	9.76E-02	9.76E-02	*	9.81E-02	*	*		*
#VALUE!	#VALUE!	#VALUE!	#VALUE!		#VALUE!	#VALUE!	#VALUE!	#VALUE!	#VALUE!	#VALUE!	#VALUE!				8.64E-02	8.64E-02	9.14E-01	9.05E-01	9.05E-01	*	9.05E-01	1.37E+00	9.15E-01	9.14E-01	1.66E+00	8.64E-02	9.46E-02	9.46E-02	*	9.51E-02	*	*		*
#VALUE!	#VALUE!	#VALUE!	#VALUE!		#VALUE!	#VALUE!	#VALUE!	#VALUE!	#VALUE!	#VALUE!	#VALUE!				8.76E-02	8.76E-02	9.18E-01	9.08E-01	9.08E-01	*	9.08E-01	1.39E+00	9.18E-01	9.18E-01	1.67E+00	8.76E-02	9.17E-02	9.17E-02	*	9.22E-02	*	*		*
#VALUE!	#VALUE!	#VALUE!	#VALUE!		#VALUE!	#VALUE!	#VALUE!	#VALUE!	#VALUE!	#VALUE!	#VALUE!				8.89E-02	8.89E-02	9.21E-01	9.11E-01	9.11E-01	*	9.11E-01	1.41E+00	9.21E-01	9.21E-01	1.69E+00	8.89E-02	8.88E-02	8.88E-02	*	8.93E-02	*	*		*
#VALUE!	#VALUE!	#VALUE!	#VALUE!		#VALUE!	#VALUE!	#VALUE!	#VALUE!	#VALUE!	#VALUE!	#VALUE!				9.02E-02	9.02E-02	9.24E-01	9.13E-01	9.14E-01	*	9.13E-01	1.43E+00	9.24E-01	9.24E-01	1.70E+00	9.02E-02	8.60E-02	8.60E-02	*	8.65E-02	*	*		*
#VALUE!	#VALUE!	#VALUE!	#VALUE!		#VALUE!	#VALUE!	#VALUE!	#VALUE!	#VALUE!	#VALUE!	#VALUE!				9.15E-02	9.15E-02	9.26E-01	9.16E-01	9.17E-01	*	9.16E-01	1.45E+00	9.27E-01	9.26E-01	1.71E+00	9.15E-02	8.33E-02	8.33E-02	*	8.38E-02	*	*		*
#VALUE!	#VALUE!	#VALUE!	#VALUE!		#VALUE!	#VALUE!	#VALUE!	#VALUE!	#VALUE!	#VALUE!	#VALUE!				9.27E-02	9.27E-02	9.29E-01	9.19E-01	9.19E-01	*	9.19E-01	1.48E+00	9.29E-01	9.29E-01	1.72E+00	9.27E-02	8.07E-02	8.07E-02	*	8.12E-02	*	*		*
#VALUE!	#VALUE!	#VALUE!	#VALUE!		#VALUE!	#VALUE!	#VALUE!	#VALUE!	#VALUE!	#VALUE!	#VALUE!				9.40E-02	9.40E-02	9.32E-01	9.21E-01	9.22E-01	*	9.21E-01	1.50E+00	9.32E-01	9.32E-01	1.74E+00	9.40E-02	7.81E-02	7.81E-02	*	7.86E-02	*	*		*
#VALUE!	#VALUE!	#VALUE!	#VALUE!		#VALUE!	#VALUE!	#VALUE!	#VALUE!	#VALUE!	#VALUE!	#VALUE!				9.53E-02	9.53E-02	9.35E-01	9.24E-01	9.24E-01	*	9.24E-01	1.52E+00	9.35E-01	9.35E-01	1.75E+00	9.53E-02	7.56E-02	7.56E-02	*	7.61E-02	*	*		*
#VALUE!	#VALUE!	#VALUE!	#VALUE!		#VALUE!	#VALUE!	#VALUE!	#VALUE!	#VALUE!	#VALUE!	#VALUE!				9.65E-02	9.65E-02	9.37E-01	9.26E-01	9.27E-01	*	9.26E-01	1.54E+00	9.37E-01	9.37E-01	1.76E+00	9.65E-02	7.31E-02	7.31E-02	*	7.36E-02	*	*		*
#VALUE!	#VALUE!	#VALUE!	#VALUE!		#VALUE!	#VALUE!	#VALUE!	#VALUE!	#VALUE!	#VALUE!	#VALUE!				9.78E-02	9.78E-02	9.40E-01	9.29E-01	9.29E-01	*	9.29E-01	1.56E+00	9.40E-01	9.40E-01	1.78E+00	9.78E-02	7.07E-02	7.07E-02	*	7.13E-02	*	*		*
#VALUE!	#VALUE!	#VALUE!	#VALUE!		#VALUE!	#VALUE!	#VALUE!	#VALUE!	#VALUE!	#VALUE!	#VALUE!				9.91E-02	9.91E-02	9.42E-01	9.31E-01	9.32E-01	*	9.31E-01	1.58E+00	9.42E-01	9.42E-01	1.79E+00	9.91E-02	6.84E-02	6.84E-02	*	6.89E-02	*	*		*
#VALUE!	#VALUE!	#VALUE!	#VALUE!		#VALUE!	#VALUE!	#VALUE!	#VALUE!	#VALUE!	#VALUE!	#VALUE!				1.00E-01	1.00E-01	9.44E-01	9.33E-01	9.34E-01	*	9.33E-01	1.60E+00	9.44E-01	9.44E-01	1.80E+00	1.00E-01	6.61E-02	6.61E-02	*	6.67E-02	*	*		*
#VALUE!	#VALUE!	#VALUE!	#VALUE!		#VALUE!	#VALUE!	#VALUE!	#VALUE!	#VALUE!	#VALUE!	#VALUE!				1.02E-01	1.02E-01	9.47E-01	9.35E-01	9.36E-01	*	9.36E-01	1.62E+00	9.47E-01	9.47E-01	1.81E+00	1.02E-01	6.39E-02	6.39E-02	*	6.45E-02	*	*		*
#VALUE!	#VALUE!	#VALUE!	#VALUE!		#VALUE!	#VALUE!	#VALUE!	#VALUE!	#VALUE!	#VALUE!	#VALUE!				1.03E-01	1.03E-01	9.49E-01	9.38E-01	9.38E-01	*	9.38E-01	1.64E+00	9.49E-01	9.49E-01	1.83E+00	1.03E-01	6.18E-02	6.18E-02	*	6.23E-02	*	*		*
#VALUE!	#VALUE!	#VALUE!	#VALUE!		#VALUE!	#VALUE!	#VALUE!	#VALUE!	#VALUE!	#VALUE!	#VALUE!				1.04E-01	1.04E-01	9.51E-01	9.40E-01	9.40E-01	*	9.40E-01	1.66E+00	9.51E-01	9.51E-01	1.84E+00	1.04E-01	5.97E-02	5.97E-02	*	6.02E-02	*	*		*
#VALUE!	#VALUE!	#VALUE!	#VALUE!		#VALUE!	#VALUE!	#VALUE!	#VALUE!	#VALUE!	#VALUE!	#VALUE!				1.05E-01	1.05E-01	9.53E-01	9.42E-01	9.42E-01	*	9.42E-01	1.68E+00	9.53E-01	9.53E-01	1.85E+00	1.05E-01	5.77E-02	5.77E-02	*	5.82E-02	*	*		*
#VALUE!	#VALUE!	#VALUE!	#VALUE!		#VALUE!	#VALUE!	#VALUE!	#VALUE!	#VALUE!	#VALUE!	#VALUE!				1.07E-01	1.07E-01	9.55E-01	9.44E-01	9.44E-01	*	9.44E-01	1.70E+00	9.55E-01	9.55E-01	1.87E+00	1.07E-01	5.57E-02	5.57E-02	*	5.62E-02	*	*		*
#VALUE!	#VALUE!	#VALUE!	#VALUE!		#VALUE!	#VALUE!	#VALUE!	#VALUE!	#VALUE!	#VALUE!	#VALUE!				1.08E-01	1.08E-01	9.57E-01	9.46E-01	9.46E-01	*	9.46E-01	1.72E+00	9.57E-01	9.57E-01	1.88E+00	1.08E-01	5.38E-02	5.38E-02	*	5.43E-02	*	*		*
#VALUE!	#VALUE!	#VALUE!	#VALUE!		#VALUE!	#VALUE!	#VALUE!	#VALUE!	#VALUE!	#VALUE!	#VALUE!				1.09E-01	1.09E-01	9.59E-01	9.47E-01	9.48E-01	*	9.48E-01	1.74E+00	9.59E-01	9.59E-01	1.90E+00	1.09E-01	5.19E-02	5.19E-02	*	5.24E-02	*	*		*
#VALUE!	#VALUE!	#VALUE!	#VALUE!		#VALUE!	#VALUE!	#VALUE!	#VALUE!	#VALUE!	#VALUE!	#VALUE!				1.11E-01	1.11E-01	9.60E-01	9.49E-01	9.50E-01	*	9.49E-01	1.76E+00	9.60E-01	9.60E-01	1.91E+00	1.11E-01	5.01E-02	5.01E-02	*	5.06E-02	*	*		*
#VALUE!	#VALUE!	#VALUE!	#VALUE!		#VALUE!	#VALUE!	#VALUE!	#VALUE!	#VALUE!	#VALUE!	#VALUE!				1.12E-01	1.12E-01	9.62E-01	9.51E-01	9.52E-01	*	9.51E-01	1.78E+00	9.62E-01	9.62E-01	1.92E+00	1.12E-01	4.83E-02	4.83E-02	*	4.88E-02	*	*		*
#VALUE!	#VALUE!	#VALUE!	#VALUE!		#VALUE!	#VALUE!	#VALUE!	#VALUE!	#VALUE!	#VALUE!	#VALUE!				1.13E-01	1.13E-01	9.64E-01	9.53E-01	9.53E-01	*	9.53E-01	1.80E+00	9.64E-01	9.64E-01	1.94E+00	1.13E-01	4.66E-02	4.66E-02	*	4.71E-02	*	*		*
#VALUE!	#VALUE!	#VALUE!	#VALUE!		#VALUE!	#VALUE!	#VALUE!	#VALUE!	#VALUE!	#VALUE!	#VALUE!				1.14E-01	1.14E-01	9.65E-01	9.54E-01	9.55E-01	*	9.55E-01	1.82E+00	9.65E-01	9.65E-01	1.95E+00	1.14E-01	4.50E-02	4.50E-02	*	4.54E-02	*	*		*
#VALUE!	#VALUE!	#VALUE!	#VALUE!		#VALUE!	#VALUE!	#VALUE!	#VALUE!	#VALUE!	#VALUE!	#VALUE!				1.16E-01	1.16E-01	9.67E-01	9.56E-01	9.57E-01	*	9.56E-01	1.84E+00	9.67E-01	9.67E-01	1.97E+00	1.16E-01	4.34E-02	4.34E-02	*	4.38E-02	*	*		*
#VALUE!	#VALUE!	#VALUE!	#VALUE!		#VALUE!	#VALUE!	#VALUE!	#VALUE!	#VALUE!	#VALUE!	#VALUE!				1.17E-01	1.17E-01	9.68E-01	9.58E-01	9.58E-01	*	9.58E-01	1.86E+00	9.68E-01	9.68E-01	1.98E+00	1.17E-01	4.18E-02	4.18E-02	*	4.23E-02	*	*		*
#VALUE!	#VALUE!	#VALUE!	#VALUE!		#VALUE!	#VALUE!	#VALUE!	#VALUE!	#VALUE!	#VALUE!	#VALUE!				1.18E-01	1.18E-01	9.70E-01	9.59E-01	9.60E-01	*	9.59E-01	1.89E+00	9.70E-01	9.70E-01	2.00E+00	1.18E-01	4.03E-02	4.03E-02	*	4.07E-02	*	*		*
#VALUE!	#VALUE!	#VALUE!	#VALUE!		#VALUE!	#VALUE!	#VALUE!	#VALUE!	#VALUE!	#VALUE!	#VALUE!				1.19E-01	1.19E-01	9.71E-01	9.61E-01	9.61E-01	*	9.61E-01	1.91E+00	9.71E-01	9.71E-01	2.01E+00	1.19E-01	3.88E-02	3.88E-02	*	3.93E-02	*	*		*
#VALUE!	#VALUE!	#VALUE!	#VALUE!		#VALUE!	#VALUE!	#VALUE!	#VALUE!	#VALUE!	#VALUE!	#VALUE!				1.21E-01	1.21E-01	9.72E-01	9.62E-01	9.63E-01	*	9.62E-01	1.93E+00	9.72E-01	9.72E-01	2.02E+00	1.21E-01	3.74E-02	3.74E-02	*	3.78E-02	*	*		*
#VALUE!	#VALUE!	#VALUE!	#VALUE!		#VALUE!	#VALUE!	#VALUE!	#VALUE!	#VALUE!	#VALUE!	#VALUE!				1.22E-01	1.22E-01	9.74E-01	9.63E-01	9.64E-01	*	9.64E-01	1.95E+00	9.74E-01	9.74E-01	2.04E+00	1.22E-01	3.60E-02	3.60E-02	*	3.64E-02	*	*		*
#VALUE!	#VALUE!	#VALUE!	#VALUE!		#VALUE!	#VALUE!	#VALUE!	#VALUE!	#VALUE!	#VALUE!	#VALUE!				1.23E-01	1.23E-01	9.75E-01	9.65E-01	9.65E-01	*	9.65E-01	1.97E+00	9.75E-01	9.75E-01	2.05E+00	1.23E-01	3.47E-02	3.47E-02	*	3.51E-02	*	*		*
#VALUE!	#VALUE!	#VALUE!	#VALUE!		#VALUE!	#VALUE!	#VALUE!	#VALUE!	#VALUE!	#VALUE!	#VALUE!				1.25E-01	1.25E-01	9.76E-01	9.66E-01	9.67E-01	*	9.66E-01	1.99E+00	9.76E-01	9.76E-01	2.07E+00	1.25E-01	3.34E-02	3.34E-02	*	3.38E-02	*	*		*
#VALUE!	#VALUE!	#VALUE!	#VALUE!		#VALUE!	#VALUE!	#VALUE!	#VALUE!	#VALUE!	#VALUE!	#VALUE!				1.26E-01	1.26E-01	9.77E-01	9.67E-01	9.68E-01	*	9.67E-01	2.01E+00	9.77E-01	9.77E-01	2.09E+00	1.26E-01	3.21E-02	3.21E-02	*	3.25E-02	*	*		*
#VALUE!	#VALUE!	#VALUE!	#VALUE!		#VALUE!	#VALUE!	#VALUE!	#VALUE!	#VALUE!	#VALUE!	#VALUE!				1.27E-01	1.27E-01	9.78E-01	9.69E-01	9.69E-01	*	9.69E-01	2.03E+00	9.78E-01	9.78E-01	2.10E+00	1.27E-01	3.09E-02	3.09E-02	*	3.13E-02	*	*		*
#VALUE!	#VALUE!	#VALUE!	#VALUE!		#VALUE!	#VALUE!	#VALUE!	#VALUE!	#VALUE!	#VALUE!	#VALUE!				1.28E-01	1.28E-01	9.79E-01	9.70E-01	9.70E-01	*	9.70E-01	2.05E+00	9.79E-01	9.79E-01	2.12E+00	1.28E-01	2.98E-02	2.98E-02	*	3.01E-02	*	*		*
#VALUE!	#VALUE!	#VALUE!	#VALUE!		#VALUE!	#VALUE!	#VALUE!	#VALUE!	#VALUE!	#VALUE!	#VALUE!				1.30E-01	1.30E-01	9.80E-01	9.71E-01	9.71E-01	*	9.71E-01	2.07E+00	9.80E-01	9.80E-01	2.13E+00	1.30E-01	2.86E-02	2.86E-02	*	2.90E-02	*	*		*
#VALUE!	#VALUE!	#VALUE!	#VALUE!		#VALUE!	#VALUE!	#VALUE!	#VALUE!	#VALUE!	#VALUE!	#VALUE!				1.31E-01	1.31E-01	9.81E-01	9.72E-01	9.72E-01	*	9.72E-01	2.09E+00	9.81E-01	9.81E-01	2.15E+00	1.31E-01	2.75E-02	2.75E-02	*	2.78E-02	*	*		*
#VALUE!	#VALUE!	#VALUE!	#VALUE!		#VALUE!	#VALUE!	#VALUE!	#VALUE!	#VALUE!	#VALUE!	#VALUE!				1.32E-01	1.32E-01	9.82E-01	9.73E-01	9.74E-01	*	9.73E-01	2.11E+00	9.82E-01	9.82E-01	2.16E+00	1.32E-01	2.65E-02	2.65E-02	*	2.68E-02	*	*		*
#VALUE!	#VALUE!	#VALUE!	#VALUE!		#VALUE!	#VALUE!	#VALUE!	#VALUE!	#VALUE!	#VALUE!	#VALUE!				1.33E-01	1.33E-01	9.83E-01	9.74E-01	9.75E-01	*	9.74E-01	2.13E+00	9.83E-01	9.83E-01	2.18E+00	1.33E-01	2.54E-02	2.54E-02	*	2.57E-02	*	*		*
#VALUE!	#VALUE!	#VALUE!	#VALUE!		#VALUE!	#VALUE!	#VALUE!	#VALUE!	#VALUE!	#VALUE!	#VALUE!				1.35E-01	1.35E-01	9.84E-01	9.75E-01	9.76E-01	*	9.75E-01	2.15E+00	9.84E-01	9.84E-01	2.20E+00	1.35E-01	2.44E-02	2.44E-02	*	2.47E-02	*	*		*
#VALUE!	#VALUE!	#VALUE!	#VALUE!		#VALUE!	#VALUE!	#VALUE!	#VALUE!	#VALUE!	#VALUE!	#VALUE!				1.36E-01	1.36E-01	9.85E-01	9.76E-01	9.77E-01	*	9.76E-01	2.17E+00	9.85E-01	9.85E-01	2.21E+00	1.36E-01	2.35E-02	2.35E-02	*	2.37E-02	*	*		*
#VALUE!	#VALUE!	#VALUE!	#VALUE!		#VALUE!	#VALUE!	#VALUE!	#VALUE!	#VALUE!	#VALUE!	#VALUE!				1.37E-01	1.37E-01	9.86E-01	9.77E-01	9.77E-01	*	9.77E-01	2.19E+00	9.85E-01	9.86E-01	2.23E+00	1.37E-01	2.25E-02	2.25E-02	*	2.28E-02	*	*		*
#VALUE!	#VALUE!	#VALUE!	#VALUE!		#VALUE!	#VALUE!	#VALUE!	#VALUE!	#VALUE!	#VALUE!	#VALUE!				1.39E-01	1.39E-01	9.86E-01	9.78E-01	9.78E-01	*	9.78E-01	2.22E+00	9.86E-01	9.86E-01	2.25E+00	1.39E-01	2.16E-02	2.16E-02	*	2.19E-02	*	*		*
#VALUE!	#VALUE!	#VALUE!	#VALUE!		#VALUE!	#VALUE!	#VALUE!	#VALUE!	#VALUE!	#VALUE!	#VALUE!				1.40E-01	1.40E-01	9.87E-01	9.79E-01	9.79E-01	*	9.79E-01	2.24E+00	9.87E-01	9.87E-01	2.26E+00	1.40E-01	2.08E-02	2.08E-02	*	2.10E-02	*	*		*
#VALUE!	#VALUE!	#VALUE!	#VALUE!		#VALUE!	#VALUE!	#VALUE!	#VALUE!	#VALUE!	#VALUE!	#VALUE!				1.41E-01	1.41E-01	9.88E-01	9.80E-01	9.80E-01	*	9.80E-01	2.26E+00	9.88E-01	9.88E-01	2.28E+00	1.41E-01	1.99E-02	1.99E-02	*	2.02E-02	*	*		*
#VALUE!	#VALUE!	#VALUE!	#VALUE!		#VALUE!	#VALUE!	#VALUE!	#VALUE!	#VALUE!	#VALUE!	#VALUE!				1.42E-01	1.42E-01	9.88E-01	9.81E-01	9.81E-01	*	9.81E-01	2.28E+00	9.88E-01	9.88E-01	2.30E+00	1.42E-01	1.91E-02	1.91E-02	*	1.93E-02	*	*		*
#VALUE!	#VALUE!	#VALUE!	#VALUE!		#VALUE!	#VALUE!	#VALUE!	#VALUE!	#VALUE!	#VALUE!	#VALUE!				1.44E-01	1.44E-01	9.89E-01	9.81E-01	9.82E-01	*	9.81E-01	2.30E+00	9.89E-01	9.89E-01	2.31E+00	1.44E-01	1.84E-02	1.84E-02	*	1.86E-02	*	*		*
#VALUE!	#VALUE!	#VALUE!	#VALUE!		#VALUE!	#VALUE!	#VALUE!	#VALUE!	#VALUE!	#VALUE!	#VALUE!				1.45E-01	1.45E-01	9.89E-01	9.82E-01	9.82E-01	*	9.82E-01	2.32E+00	9.89E-01	9.89E-01	2.33E+00	1.45E-01	1.76E-02	1.76E-02	*	1.78E-02	*	*		*
#VALUE!	#VALUE!	#VALUE!	#VALUE!		#VALUE!	#VALUE!	#VALUE!	#VALUE!	#VALUE!	#VALUE!	#VALUE!				1.46E-01	1.46E-01	9.90E-01	9.83E-01	9.83E-01	*	9.83E-01	2.34E+00	9.90E-01	9.90E-01	2.35E+00	1.46E-01	1.69E-02	1.69E-02	*	1.71E-02	*	*		*
#VALUE!	#VALUE!	#VALUE!	#VALUE!		#VALUE!	#VALUE!	#VALUE!	#VALUE!	#VALUE!	#VALUE!	#VALUE!				1.47E-01	1.47E-01	9.91E-01	9.84E-01	9.84E-01	*	9.84E-01	2.36E+00	9.91E-01	9.91E-01	2.37E+00	1.47E-01	1.62E-02	1.62E-02	*	1.64E-02	*	*		*
#VALUE!	#VALUE!	#VALUE!	#VALUE!		#VALUE!	#VALUE!	#VALUE!	#VALUE!	#VALUE!	#VALUE!	#VALUE!				1.49E-01	1.49E-01	9.91E-01	9.84E-01	9.84E-01	*	9.84E-01	2.38E+00	9.91E-01	9.91E-01	2.38E+00	1.49E-01	1.55E-02	1.55E-02	*	1.57E-02	*	*		*
#VALUE!	#VALUE!	#VALUE!	#VALUE!		#VALUE!	#VALUE!	#VALUE!	#VALUE!	#VALUE!	#VALUE!	#VALUE!				1.50E-01	1.50E-01	9.92E-01	9.85E-01	9.85E-01	*	9.85E-01	2.40E+00	9.92E-01	9.92E-01	2.40E+00	1.50E-01	1.49E-02	1.49E-02	*	1.50E-02	*	*		*
#VALUE!	#VALUE!	#VALUE!	#VALUE!		#VALUE!	#VALUE!	#VALUE!	#VALUE!	#VALUE!	#VALUE!	#VALUE!				1.51E-01	1.51E-01	9.92E-01	9.86E-01	9.86E-01	*	9.86E-01	2.42E+00	9.92E-01	9.92E-01	2.42E+00	1.51E-01	1.42E-02	1.42E-02	*	1.44E-02	*	*		*
#VALUE!	#VALUE!	#VALUE!	#VALUE!		#VALUE!	#VALUE!	#VALUE!	#VALUE!	#VALUE!	#VALUE!	#VALUE!				1.52E-01	1.52E-01	9.92E-01	9.86E-01	9.86E-01	*	9.86E-01	2.44E+00	9.92E-01	9.92E-01	2.44E+00	1.52E-01	1.36E-02	1.36E-02	*	1.38E-02	*	*		*
#VALUE!	#VALUE!	#VALUE!	#VALUE!		#VALUE!	#VALUE!	#VALUE!	#VALUE!	#VALUE!	#VALUE!	#VALUE!				1.54E-01	1.54E-01	9.93E-01	9.87E-01	9.87E-01	*	9.87E-01	2.47E+00	9.93E-01	9.93E-01	2.46E+00	1.54E-01	1.31E-02	1.31E-02	*	1.32E-02	*	*		*
#VALUE!	#VALUE!	#VALUE!	#VALUE!		#VALUE!	#VALUE!	#VALUE!	#VALUE!	#VALUE!	#VALUE!	#VALUE!				1.55E-01	1.55E-01	9.93E-01	9.87E-01	9.87E-01	*	9.87E-01	2.49E+00	9.93E-01	9.93E-01	2.47E+00	1.55E-01	1.25E-02	1.25E-02	*	1.26E-02	*	*		*
#VALUE!	#VALUE!	#VALUE!	#VALUE!		#VALUE!	#VALUE!	#VALUE!	#VALUE!	#VALUE!	#VALUE!	#VALUE!				1.56E-01	1.56E-01	9.94E-01	9.88E-01	9.88E-01	*	9.88E-01	2.51E+00	9.94E-01	9.94E-01	2.49E+00	1.56E-01	1.20E-02	1.20E-02	*	1.21E-02	*	*		*
#VALUE!	#VALUE!	#VALUE!	#VALUE!		#VALUE!	#VALUE!	#VALUE!	#VALUE!	#VALUE!	#VALUE!	#VALUE!				1.58E-01	1.58E-01	9.94E-01	9.88E-01	9.89E-01	*	9.88E-01	2.53E+00	9.94E-01	9.94E-01	2.51E+00	1.58E-01	1.14E-02	1.14E-02	*	1.15E-02	*	*		*
#VALUE!	#VALUE!	#VALUE!	#VALUE!		#VALUE!	#VALUE!	#VALUE!	#VALUE!	#VALUE!	#VALUE!	#VALUE!				1.59E-01	1.59E-01	9.94E-01	9.89E-01	9.89E-01	*	9.89E-01	2.55E+00	9.94E-01	9.94E-01	2.53E+00	1.59E-01	1.10E-02	1.10E-02	*	1.10E-02	*	*		*
#VALUE!	#VALUE!	#VALUE!	#VALUE!		#VALUE!	#VALUE!	#VALUE!	#VALUE!	#VALUE!	#VALUE!	#VALUE!				1.60E-01	1.60E-01	9.95E-01	9.89E-01	9.90E-01	*	9.89E-01	2.57E+00	9.95E-01	9.95E-01	2.55E+00	1.60E-01	1.05E-02	1.05E-02	*	1.05E-02	*	*		*
#VALUE!	#VALUE!	#VALUE!	#VALUE!		#VALUE!	#VALUE!	#VALUE!	#VALUE!	#VALUE!	#VALUE!	#VALUE!				1.61E-01	1.61E-01	9.95E-01	9.90E-01	9.90E-01	*	9.90E-01	2.59E+00	9.95E-01	9.95E-01	2.57E+00	1.61E-01	1.00E-02	1.00E-02	*	1.01E-02	*	*		*
#VALUE!	#VALUE!	#VALUE!	#VALUE!		#VALUE!	#VALUE!	#VALUE!	#VALUE!	#VALUE!	#VALUE!	#VALUE!				1.63E-01	1.63E-01	9.95E-01	9.90E-01	9.90E-01	*	9.90E-01	2.61E+00	9.95E-01	9.95E-01	2.59E+00	1.63E-01	9.58E-03	9.58E-03	*	9.62E-03	*	*		*
#VALUE!	#VALUE!	#VALUE!	#VALUE!		#VALUE!	#VALUE!	#VALUE!	#VALUE!	#VALUE!	#VALUE!	#VALUE!				1.64E-01	1.64E-01	9.96E-01	9.91E-01	9.91E-01	*	9.91E-01	2.63E+00	9.96E-01	9.96E-01	2.61E+00	1.64E-01	9.15E-03	9.15E-03	*	9.19E-03	*	*		*
#VALUE!	#VALUE!	#VALUE!	#VALUE!		#VALUE!	#VALUE!	#VALUE!	#VALUE!	#VALUE!	#VALUE!	#VALUE!				1.65E-01	1.65E-01	9.96E-01	9.91E-01	9.91E-01	*	9.91E-01	2.65E+00	9.96E-01	9.96E-01	2.63E+00	1.65E-01	8.74E-03	8.74E-03	*	8.78E-03	*	*		*
#VALUE!	#VALUE!	#VALUE!	#VALUE!		#VALUE!	#VALUE!	#VALUE!	#VALUE!	#VALUE!	#VALUE!	#VALUE!				1.66E-01	1.66E-01	9.96E-01	9.92E-01	9.92E-01	*	9.92E-01	2.67E+00	9.96E-01	9.96E-01	2.65E+00	1.66E-01	8.35E-03	8.35E-03	*	8.38E-03	*	*		*
#VALUE!	#VALUE!	#VALUE!	#VALUE!		#VALUE!	#VALUE!	#VALUE!	#VALUE!	#VALUE!	#VALUE!	#VALUE!				1.68E-01	1.68E-01	9.96E-01	9.92E-01	9.92E-01	*	9.92E-01	2.70E+00	9.96E-01	9.96E-01	2.67E+00	1.68E-01	7.98E-03	7.98E-03	*	7.99E-03	*	*		*
#VALUE!	#VALUE!	#VALUE!	#VALUE!		#VALUE!	#VALUE!	#VALUE!	#VALUE!	#VALUE!	#VALUE!	#VALUE!				1.69E-01	1.69E-01	9.97E-01	9.92E-01	9.92E-01	*	9.92E-01	2.72E+00	9.96E-01	9.97E-01	2.69E+00	1.69E-01	7.62E-03	7.62E-03	*	7.63E-03	*	*		*
#VALUE!	#VALUE!	#VALUE!	#VALUE!		#VALUE!	#VALUE!	#VALUE!	#VALUE!	#VALUE!	#VALUE!	#VALUE!				1.70E-01	1.70E-01	9.97E-01	9.93E-01	9.93E-01	*	9.93E-01	2.74E+00	9.97E-01	9.97E-01	2.71E+00	1.70E-01	7.27E-03	7.27E-03	*	7.28E-03	*	*		*
#VALUE!	#VALUE!	#VALUE!	#VALUE!		#VALUE!	#VALUE!	#VALUE!	#VALUE!	#VALUE!	#VALUE!	#VALUE!				1.72E-01	1.72E-01	9.97E-01	9.93E-01	9.93E-01	*	9.93E-01	2.76E+00	9.97E-01	9.97E-01	2.73E+00	1.72E-01	6.94E-03	6.94E-03	*	6.94E-03	*	*		*
#VALUE!	#VALUE!	#VALUE!	#VALUE!		#VALUE!	#VALUE!	#VALUE!	#VALUE!	#VALUE!	#VALUE!	#VALUE!				1.73E-01	1.73E-01	9.97E-01	9.93E-01	9.93E-01	*	9.93E-01	2.78E+00	9.97E-01	9.97E-01	2.75E+00	1.73E-01	6.62E-03	6.62E-03	*	6.61E-03	*	*		*
#VALUE!	#VALUE!	#VALUE!	#VALUE!		#VALUE!	#VALUE!	#VALUE!	#VALUE!	#VALUE!	#VALUE!	#VALUE!				1.74E-01	1.74E-01	9.97E-01	9.94E-01	9.94E-01	*	9.94E-01	2.80E+00	9.97E-01	9.97E-01	2.77E+00	1.74E-01	6.32E-03	6.32E-03	*	6.30E-03	*	*		*
#VALUE!	#VALUE!	#VALUE!	#VALUE!		#VALUE!	#VALUE!	#VALUE!	#VALUE!	#VALUE!	#VALUE!	#VALUE!				1.75E-01	1.75E-01	9.97E-01	9.94E-01	9.94E-01	*	9.94E-01	2.82E+00	9.97E-01	9.97E-01	2.80E+00	1.75E-01	6.03E-03	6.03E-03	*	6.00E-03	*	*		*
#VALUE!	#VALUE!	#VALUE!	#VALUE!		#VALUE!	#VALUE!	#VALUE!	#VALUE!	#VALUE!	#VALUE!	#VALUE!				1.77E-01	1.77E-01	9.98E-01	9.94E-01	9.94E-01	*	9.94E-01	2.84E+00	9.98E-01	9.98E-01	2.82E+00	1.77E-01	5.75E-03	5.75E-03	*	5.72E-03	*	*		*
#VALUE!	#VALUE!	#VALUE!	#VALUE!		#VALUE!	#VALUE!	#VALUE!	#VALUE!	#VALUE!	#VALUE!	#VALUE!				1.78E-01	1.78E-01	9.98E-01	9.95E-01	9.95E-01	*	9.95E-01	2.86E+00	9.98E-01	9.98E-01	2.84E+00	1.78E-01	5.48E-03	5.48E-03	*	5.45E-03	*	*		*
#VALUE!	#VALUE!	#VALUE!	#VALUE!		#VALUE!	#VALUE!	#VALUE!	#VALUE!	#VALUE!	#VALUE!	#VALUE!				1.79E-01	1.79E-01	9.98E-01	9.95E-01	9.95E-01	*	9.95E-01	2.89E+00	9.98E-01	9.98E-01	2.86E+00	1.79E-01	5.22E-03	5.22E-03	*	5.18E-03	*	*		*
#VALUE!	#VALUE!	#VALUE!	#VALUE!		#VALUE!	#VALUE!	#VALUE!	#VALUE!	#VALUE!	#VALUE!	#VALUE!				1.80E-01	1.80E-01	9.98E-01	9.95E-01	9.95E-01	*	9.95E-01	2.91E+00	9.98E-01	9.98E-01	2.88E+00	1.80E-01	4.97E-03	4.97E-03	*	4.93E-03	*	*		*
#VALUE!	#VALUE!	#VALUE!	#VALUE!		#VALUE!	#VALUE!	#VALUE!	#VALUE!	#VALUE!	#VALUE!	#VALUE!				1.82E-01	1.82E-01	9.98E-01	9.95E-01	9.95E-01	*	9.95E-01	2.93E+00	9.98E-01	9.98E-01	2.91E+00	1.82E-01	4.74E-03	4.74E-03	*	4.69E-03	*	*		*
#VALUE!	#VALUE!	#VALUE!	#VALUE!		#VALUE!	#VALUE!	#VALUE!	#VALUE!	#VALUE!	#VALUE!	#VALUE!				1.83E-01	1.83E-01	9.98E-01	9.96E-01	9.95E-01	*	9.96E-01	2.95E+00	9.98E-01	9.98E-01	2.93E+00	1.83E-01	4.51E-03	4.51E-03	*	4.46E-03	*	*		*
#VALUE!	#VALUE!	#VALUE!	#VALUE!		#VALUE!	#VALUE!	#VALUE!	#VALUE!	#VALUE!	#VALUE!	#VALUE!				1.84E-01	1.84E-01	9.98E-01	9.96E-01	9.96E-01	*	9.96E-01	2.97E+00	9.98E-01	9.98E-01	2.95E+00	1.84E-01	4.30E-03	4.30E-03	*	4.24E-03	*	*		*
#VALUE!	#VALUE!	#VALUE!	#VALUE!		#VALUE!	#VALUE!	#VALUE!	#VALUE!	#VALUE!	#VALUE!	#VALUE!				1.86E-01	1.86E-01	9.99E-01	9.96E-01	9.96E-01	*	9.96E-01	2.99E+00	9.98E-01	9.99E-01	2.98E+00	1.86E-01	4.09E-03	4.09E-03	*	4.03E-03	*	*		*
#VALUE!	#VALUE!	#VALUE!	#VALUE!		#VALUE!	#VALUE!	#VALUE!	#VALUE!	#VALUE!	#VALUE!	#VALUE!				1.87E-01	1.87E-01	9.99E-01	9.96E-01	9.96E-01	*	9.96E-01	3.01E+00	9.99E-01	9.99E-01	3.00E+00	1.87E-01	3.89E-03	3.89E-03	*	3.83E-03	*	*		*
#VALUE!	#VALUE!	#VALUE!	#VALUE!		#VALUE!	#VALUE!	#VALUE!	#VALUE!	#VALUE!	#VALUE!	#VALUE!				1.88E-01	1.88E-01	9.99E-01	9.96E-01	9.96E-01	*	9.96E-01	3.03E+00	9.99E-01	9.99E-01	3.02E+00	1.88E-01	3.70E-03	3.70E-03	*	3.64E-03	*	*		*
#VALUE!	#VALUE!	#VALUE!	#VALUE!		#VALUE!	#VALUE!	#VALUE!	#VALUE!	#VALUE!	#VALUE!	#VALUE!				1.89E-01	1.89E-01	9.99E-01	9.97E-01	9.96E-01	*	9.97E-01	3.06E+00	9.99E-01	9.99E-01	3.05E+00	1.89E-01	3.52E-03	3.52E-03	*	3.46E-03	*	*		*
#VALUE!	#VALUE!	#VALUE!	#VALUE!		#VALUE!	#VALUE!	#VALUE!	#VALUE!	#VALUE!	#VALUE!	#VALUE!				1.91E-01	1.91E-01	9.99E-01	9.97E-01	9.97E-01	*	9.97E-01	3.08E+00	9.99E-01	9.99E-01	3.07E+00	1.91E-01	3.35E-03	3.35E-03	*	3.28E-03	*	*		*
#VALUE!	#VALUE!	#VALUE!	#VALUE!		#VALUE!	#VALUE!	#VALUE!	#VALUE!	#VALUE!	#VALUE!	#VALUE!				1.92E-01	1.92E-01	9.99E-01	9.97E-01	9.97E-01	*	9.97E-01	3.10E+00	9.99E-01	9.99E-01	3.10E+00	1.92E-01	3.19E-03	3.19E-03	*	3.12E-03	*	*		*
#VALUE!	#VALUE!	#VALUE!	#VALUE!		#VALUE!	#VALUE!	#VALUE!	#VALUE!	#VALUE!	#VALUE!	#VALUE!				1.93E-01	1.93E-01	9.99E-01	9.97E-01	9.97E-01	*	9.97E-01	3.12E+00	9.99E-01	9.99E-01	3.12E+00	1.93E-01	3.03E-03	3.03E-03	*	2.96E-03	*	*		*
#VALUE!	#VALUE!	#VALUE!	#VALUE!		#VALUE!	#VALUE!	#VALUE!	#VALUE!	#VALUE!	#VALUE!	#VALUE!				1.94E-01	1.94E-01	9.99E-01	9.97E-01	9.97E-01	*	9.97E-01	3.14E+00	9.99E-01	9.99E-01	3.15E+00	1.94E-01	2.88E-03	2.88E-03	*	2.80E-03	*	*		*
#VALUE!	#VALUE!	#VALUE!	#VALUE!		#VALUE!	#VALUE!	#VALUE!	#VALUE!	#VALUE!	#VALUE!	#VALUE!				1.96E-01	1.96E-01	9.99E-01	9.97E-01	9.97E-01	*	9.97E-01	3.16E+00	9.99E-01	9.99E-01	3.17E+00	1.96E-01	2.73E-03	2.73E-03	*	2.66E-03	*	*		*
#VALUE!	#VALUE!	#VALUE!	#VALUE!		#VALUE!	#VALUE!	#VALUE!	#VALUE!	#VALUE!	#VALUE!	#VALUE!				1.97E-01	1.97E-01	9.99E-01	9.98E-01	9.97E-01	*	9.97E-01	3.18E+00	9.99E-01	9.99E-01	3.20E+00	1.97E-01	2.60E-03	2.60E-03	*	2.52E-03	*	*		*
#VALUE!	#VALUE!	#VALUE!	#VALUE!		#VALUE!	#VALUE!	#VALUE!	#VALUE!	#VALUE!	#VALUE!	#VALUE!				1.98E-01	1.98E-01	9.99E-01	9.98E-01	9.98E-01	*	9.98E-01	3.20E+00	9.99E-01	9.99E-01	3.22E+00	1.98E-01	2.47E-03	2.47E-03	*	2.39E-03	*	*		*
#VALUE!	#VALUE!	#VALUE!	#VALUE!		#VALUE!	#VALUE!	#VALUE!	#VALUE!	#VALUE!	#VALUE!	#VALUE!				2.00E-01	2.00E-01	9.99E-01	9.98E-01	9.98E-01	*	9.98E-01	3.23E+00	9.99E-01	9.99E-01	3.25E+00	2.00E-01	2.34E-03	2.34E-03	*	2.26E-03	*	*		*
#VALUE!	#VALUE!	#VALUE!	#VALUE!		#VALUE!	#VALUE!	#VALUE!	#VALUE!	#VALUE!	#VALUE!	#VALUE!				2.01E-01	2.01E-01	9.99E-01	9.98E-01	9.98E-01	*	9.98E-01	3.25E+00	9.99E-01	9.99E-01	3.27E+00	2.01E-01	2.22E-03	2.22E-03	*	2.14E-03	*	*		*
#VALUE!	#VALUE!	#VALUE!	#VALUE!		#VALUE!	#VALUE!	#VALUE!	#VALUE!	#VALUE!	#VALUE!	#VALUE!				2.02E-01	2.02E-01	9.99E-01	9.98E-01	9.98E-01	*	9.98E-01	3.27E+00	9.99E-01	9.99E-01	3.30E+00	2.02E-01	2.11E-03	2.11E-03	*	2.03E-03	*	*		*
#VALUE!	#VALUE!	#VALUE!	#VALUE!		#VALUE!	#VALUE!	#VALUE!	#VALUE!	#VALUE!	#VALUE!	#VALUE!				2.03E-01	2.03E-01	9.99E-01	9.98E-01	9.98E-01	*	9.98E-01	3.29E+00	9.99E-01	9.99E-01	3.33E+00	2.03E-01	2.00E-03	2.00E-03	*	1.92E-03	*	*		*
#VALUE!	#VALUE!	#VALUE!	#VALUE!		#VALUE!	#VALUE!	#VALUE!	#VALUE!	#VALUE!	#VALUE!	#VALUE!				2.05E-01	2.05E-01	9.99E-01	9.98E-01	9.98E-01	*	9.98E-01	3.31E+00	9.99E-01	9.99E-01	3.35E+00	2.05E-01	1.90E-03	1.90E-03	*	1.82E-03	*	*		*
#VALUE!	#VALUE!	#VALUE!	#VALUE!		#VALUE!	#VALUE!	#VALUE!	#VALUE!	#VALUE!	#VALUE!	#VALUE!				2.06E-01	2.06E-01	1.00E+00	9.98E-01	9.98E-01	*	9.98E-01	3.33E+00	1.00E+00	1.00E+00	3.38E+00	2.06E-01	1.80E-03	1.80E-03	*	1.72E-03	*	*		*
#VALUE!	#VALUE!	#VALUE!	#VALUE!		#VALUE!	#VALUE!	#VALUE!	#VALUE!	#VALUE!	#VALUE!	#VALUE!				2.07E-01	2.07E-01	1.00E+00	9.98E-01	9.98E-01	*	9.98E-01	3.35E+00	1.00E+00	1.00E+00	3.41E+00	2.07E-01	1.71E-03	1.71E-03	*	1.63E-03	*	*		*
#VALUE!	#VALUE!	#VALUE!	#VALUE!		#VALUE!	#VALUE!	#VALUE!	#VALUE!	#VALUE!	#VALUE!	#VALUE!				2.08E-01	2.08E-01	1.00E+00	9.98E-01	9.98E-01	*	9.98E-01	3.38E+00	1.00E+00	1.00E+00	3.44E+00	2.08E-01	1.62E-03	1.62E-03	*	1.54E-03	*	*		*
#VALUE!	#VALUE!	#VALUE!	#VALUE!		#VALUE!	#VALUE!	#VALUE!	#VALUE!	#VALUE!	#VALUE!	#VALUE!				2.10E-01	2.10E-01	1.00E+00	9.99E-01	9.98E-01	*	9.99E-01	3.40E+00	1.00E+00	1.00E+00	3.47E+00	2.10E-01	1.53E-03	1.53E-03	*	1.45E-03	*	*		*
#VALUE!	#VALUE!	#VALUE!	#VALUE!		#VALUE!	#VALUE!	#VALUE!	#VALUE!	#VALUE!	#VALUE!	#VALUE!				2.11E-01	2.11E-01	1.00E+00	9.99E-01	9.99E-01	*	9.99E-01	3.42E+00	1.00E+00	1.00E+00	3.49E+00	2.11E-01	1.45E-03	1.45E-03	*	1.37E-03	*	*		*
#VALUE!	#VALUE!	#VALUE!	#VALUE!		#VALUE!	#VALUE!	#VALUE!	#VALUE!	#VALUE!	#VALUE!	#VALUE!				2.12E-01	2.12E-01	1.00E+00	9.99E-01	9.99E-01	*	9.99E-01	3.44E+00	1.00E+00	1.00E+00	3.52E+00	2.12E-01	1.38E-03	1.38E-03	*	1.30E-03	*	*		*
#VALUE!	#VALUE!	#VALUE!	#VALUE!		#VALUE!	#VALUE!	#VALUE!	#VALUE!	#VALUE!	#VALUE!	#VALUE!				2.14E-01	2.14E-01	1.00E+00	9.99E-01	9.99E-01	*	9.99E-01	3.46E+00	1.00E+00	1.00E+00	3.55E+00	2.14E-01	1.30E-03	1.30E-03	*	1.22E-03	*	*		*
#VALUE!	#VALUE!	#VALUE!	#VALUE!		#VALUE!	#VALUE!	#VALUE!	#VALUE!	#VALUE!	#VALUE!	#VALUE!				2.15E-01	2.15E-01	1.00E+00	9.99E-01	9.99E-01	*	9.99E-01	3.48E+00	1.00E+00	1.00E+00	3.58E+00	2.15E-01	1.23E-03	1.23E-03	*	1.15E-03	*	*		*
#VALUE!	#VALUE!	#VALUE!	#VALUE!		#VALUE!	#VALUE!	#VALUE!	#VALUE!	#VALUE!	#VALUE!	#VALUE!				2.16E-01	2.16E-01	1.00E+00	9.99E-01	9.99E-01	*	9.99E-01	3.51E+00	1.00E+00	1.00E+00	3.61E+00	2.16E-01	1.17E-03	1.17E-03	*	1.09E-03	*	*		*
#VALUE!	#VALUE!	#VALUE!	#VALUE!		#VALUE!	#VALUE!	#VALUE!	#VALUE!	#VALUE!	#VALUE!	#VALUE!				2.17E-01	2.17E-01	1.00E+00	9.99E-01	9.99E-01	*	9.99E-01	3.53E+00	1.00E+00	1.00E+00	3.64E+00	2.17E-01	1.10E-03	1.10E-03	*	1.03E-03	*	*		*
#VALUE!	#VALUE!	#VALUE!	#VALUE!		#VALUE!	#VALUE!	#VALUE!	#VALUE!	#VALUE!	#VALUE!	#VALUE!				2.19E-01	2.19E-01	1.00E+00	9.99E-01	9.99E-01	*	9.99E-01	3.55E+00	1.00E+00	1.00E+00	3.67E+00	2.19E-01	1.05E-03	1.05E-03	*	*	*	*		*
#VALUE!	#VALUE!	#VALUE!	#VALUE!		#VALUE!	#VALUE!	#VALUE!	#VALUE!	#VALUE!	#VALUE!	#VALUE!				2.20E-01	2.20E-01	1.00E+00	9.99E-01	9.99E-01	*	9.99E-01	3.57E+00	1.00E+00	1.00E+00	3.70E+00	2.20E-01	*	*	*	*	*	*		*
#VALUE!	#VALUE!	#VALUE!	#VALUE!		#VALUE!	#VALUE!	#VALUE!	#VALUE!	#VALUE!	#VALUE!	#VALUE!				2.21E-01	2.21E-01	1.00E+00	9.99E-01	9.99E-01	*	9.99E-01	3.59E+00	1.00E+00	1.00E+00	3.74E+00	2.21E-01	*	*	*	*	*	*		*
#VALUE!	#VALUE!	#VALUE!	#VALUE!		#VALUE!	#VALUE!	#VALUE!	#VALUE!	#VALUE!	#VALUE!	#VALUE!				2.22E-01	2.22E-01	1.00E+00	9.99E-01	9.99E-01	*	9.99E-01	3.61E+00	1.00E+00	1.00E+00	3.77E+00	2.22E-01	*	*	*	*	*	*		*
#VALUE!	#VALUE!	#VALUE!	#VALUE!		#VALUE!	#VALUE!	#VALUE!	#VALUE!	#VALUE!	#VALUE!	#VALUE!				2.24E-01	2.24E-01	1.00E+00	9.99E-01	9.99E-01	*	9.99E-01	3.64E+00	1.00E+00	1.00E+00	3.80E+00	2.24E-01	*	*	*	*	*	*		*
#VALUE!	#VALUE!	#VALUE!	#VALUE!		#VALUE!	#VALUE!	#VALUE!	#VALUE!	#VALUE!	#VALUE!	#VALUE!				2.25E-01	2.25E-01	1.00E+00	9.99E-01	9.99E-01	*	9.99E-01	3.66E+00	1.00E+00	1.00E+00	3.83E+00	2.25E-01	*	*	*	*	*	*		*
#VALUE!	#VALUE!	#VALUE!	#VALUE!		#VALUE!	#VALUE!	#VALUE!	#VALUE!	#VALUE!	#VALUE!	#VALUE!				2.26E-01	2.26E-01	1.00E+00	9.99E-01	9.99E-01	*	9.99E-01	3.68E+00	1.00E+00	1.00E+00	3.87E+00	2.26E-01	*	*	*	*	*	*		*
#VALUE!	#VALUE!	#VALUE!	#VALUE!		#VALUE!	#VALUE!	#VALUE!	#VALUE!	#VALUE!	#VALUE!	#VALUE!				2.28E-01	2.28E-01	1.00E+00	9.99E-01	9.99E-01	*	9.99E-01	3.70E+00	1.00E+00	1.00E+00	3.90E+00	2.28E-01	*	*	*	*	*	*		*
#VALUE!	#VALUE!	#VALUE!	#VALUE!		#VALUE!	#VALUE!	#VALUE!	#VALUE!	#VALUE!	#VALUE!	#VALUE!				2.29E-01	2.29E-01	1.00E+00	9.99E-01	9.99E-01	*	9.99E-01	3.72E+00	1.00E+00	1.00E+00	3.93E+00	2.29E-01	*	*	*	*	*	*		*
#VALUE!	#VALUE!	#VALUE!	#VALUE!		#VALUE!	#VALUE!	#VALUE!	#VALUE!	#VALUE!	#VALUE!	#VALUE!				2.30E-01	2.30E-01	1.00E+00	9.99E-01	9.99E-01	*	9.99E-01	3.75E+00	1.00E+00	1.00E+00	3.97E+00	2.30E-01	*	*	*	*	*	*		*
#VALUE!	#VALUE!	#VALUE!	#VALUE!		#VALUE!	#VALUE!	#VALUE!	#VALUE!	#VALUE!	#VALUE!	#VALUE!				2.31E-01	2.31E-01	1.00E+00	9.99E-01	9.99E-01	*	9.99E-01	3.77E+00	1.00E+00	1.00E+00	4.00E+00	2.31E-01	*	*	*	*	*	*		*
#VALUE!	#VALUE!	#VALUE!	#VALUE!		#VALUE!	#VALUE!	#VALUE!	#VALUE!	#VALUE!	#VALUE!	#VALUE!				2.33E-01	2.33E-01	1.00E+00	1.00E+00	9.99E-01	*	1.00E+00	3.79E+00	1.00E+00	1.00E+00	4.04E+00	2.33E-01	*	*	*	*	*	*		*
#VALUE!	#VALUE!	#VALUE!	#VALUE!		#VALUE!	#VALUE!	#VALUE!	#VALUE!	#VALUE!	#VALUE!	#VALUE!				2.34E-01	2.34E-01	1.00E+00	1.00E+00	9.99E-01	*	1.00E+00	3.81E+00	1.00E+00	1.00E+00	4.07E+00	2.34E-01	*	*	*	*	*	*		*
#VALUE!	#VALUE!	#VALUE!	#VALUE!		#VALUE!	#VALUE!	#VALUE!	#VALUE!	#VALUE!	#VALUE!	#VALUE!				2.35E-01	2.35E-01	1.00E+00	1.00E+00	1.00E+00	*	1.00E+00	3.83E+00	1.00E+00	1.00E+00	4.11E+00	2.35E-01	*	*	*	*	*	*		*
#VALUE!	#VALUE!	#VALUE!	#VALUE!		#VALUE!	#VALUE!	#VALUE!	#VALUE!	#VALUE!	#VALUE!	#VALUE!				2.36E-01	2.36E-01	1.00E+00	1.00E+00	1.00E+00	*	1.00E+00	3.85E+00	1.00E+00	1.00E+00	4.14E+00	2.36E-01	*	*	*	*	*	*		*
#VALUE!	#VALUE!	#VALUE!	#VALUE!		#VALUE!	#VALUE!	#VALUE!	#VALUE!	#VALUE!	#VALUE!	#VALUE!				2.38E-01	2.38E-01	1.00E+00	1.00E+00	1.00E+00	*	1.00E+00	3.88E+00	1.00E+00	1.00E+00	4.18E+00	2.38E-01	*	*	*	*	*	*		*
#VALUE!	#VALUE!	#VALUE!	#VALUE!		#VALUE!	#VALUE!	#VALUE!	#VALUE!	#VALUE!	#VALUE!	#VALUE!				2.39E-01	2.39E-01	1.00E+00	1.00E+00	1.00E+00	*	1.00E+00	3.90E+00	1.00E+00	1.00E+00	4.22E+00	2.39E-01	*	*	*	*	*	*		*
#VALUE!	#VALUE!	#VALUE!	#VALUE!		#VALUE!	#VALUE!	#VALUE!	#VALUE!	#VALUE!	#VALUE!	#VALUE!				2.40E-01	2.40E-01	1.00E+00	1.00E+00	1.00E+00	*	1.00E+00	3.92E+00	1.00E+00	1.00E+00	4.25E+00	2.40E-01	*	*	*	*	*	*		*
#VALUE!	#VALUE!	#VALUE!	#VALUE!		#VALUE!	#VALUE!	#VALUE!	#VALUE!	#VALUE!	#VALUE!	#VALUE!				2.42E-01	2.42E-01	1.00E+00	1.00E+00	1.00E+00	*	1.00E+00	3.94E+00	1.00E+00	1.00E+00	4.29E+00	2.42E-01	*	*	*	*	*	*		*
#VALUE!	#VALUE!	#VALUE!	#VALUE!		#VALUE!	#VALUE!	#VALUE!	#VALUE!	#VALUE!	#VALUE!	#VALUE!				2.43E-01	2.43E-01	1.00E+00	1.00E+00	1.00E+00	*	1.00E+00	3.96E+00	1.00E+00	1.00E+00	4.33E+00	2.43E-01	*	*	*	*	*	*		*
#VALUE!	#VALUE!	#VALUE!	#VALUE!		#VALUE!	#VALUE!	#VALUE!	#VALUE!	#VALUE!	#VALUE!	#VALUE!				2.44E-01	2.44E-01	1.00E+00	1.00E+00	1.00E+00	*	1.00E+00	3.99E+00	1.00E+00	1.00E+00	4.37E+00	2.44E-01	*	*	*	*	*	*		*
#VALUE!	#VALUE!	#VALUE!	#VALUE!		#VALUE!	#VALUE!	#VALUE!	#VALUE!	#VALUE!	#VALUE!	#VALUE!				2.45E-01	2.45E-01	1.00E+00	1.00E+00	1.00E+00	*	1.00E+00	4.01E+00	1.00E+00	1.00E+00	4.41E+00	2.45E-01	*	*	*	*	*	*		*
#VALUE!	#VALUE!	#VALUE!	#VALUE!		#VALUE!	#VALUE!	#VALUE!	#VALUE!	#VALUE!	#VALUE!	#VALUE!				2.47E-01	2.47E-01	1.00E+00	1.00E+00	1.00E+00	*	1.00E+00	4.03E+00	1.00E+00	1.00E+00	4.45E+00	2.47E-01	*	*	*	*	*	*		*
#VALUE!	#VALUE!	#VALUE!	#VALUE!		#VALUE!	#VALUE!	#VALUE!	#VALUE!	#VALUE!	#VALUE!	#VALUE!				2.48E-01	2.48E-01	1.00E+00	1.00E+00	1.00E+00	*	1.00E+00	4.05E+00	1.00E+00	1.00E+00	4.49E+00	2.48E-01	*	*	*	*	*	*		*
#VALUE!	#VALUE!	#VALUE!	#VALUE!		#VALUE!	#VALUE!	#VALUE!	#VALUE!	#VALUE!	#VALUE!	#VALUE!				2.49E-01	2.49E-01	1.00E+00	1.00E+00	1.00E+00	*	1.00E+00	4.08E+00	1.00E+00	1.00E+00	4.53E+00	2.49E-01	*	*	*	*	*	*		*
#VALUE!	#VALUE!	#VALUE!	#VALUE!		#VALUE!	#VALUE!	#VALUE!	#VALUE!	#VALUE!	#VALUE!	#VALUE!				2.50E-01	2.50E-01	1.00E+00	1.00E+00	1.00E+00	*	1.00E+00	4.10E+00	1.00E+00	1.00E+00	4.57E+00	2.50E-01	*	*	*	*	*	*		*
#VALUE!	#VALUE!	#VALUE!	#VALUE!		#VALUE!	#VALUE!	#VALUE!	#VALUE!	#VALUE!	#VALUE!	#VALUE!				2.52E-01	2.52E-01	1.00E+00	1.00E+00	1.00E+00	*	1.00E+00	4.12E+00	1.00E+00	1.00E+00	4.62E+00	2.52E-01	*	*	*	*	*	*		*
#VALUE!	#VALUE!	#VALUE!	#VALUE!		#VALUE!	#VALUE!	#VALUE!	#VALUE!	#VALUE!	#VALUE!	#VALUE!				2.53E-01	2.53E-01	1.00E+00	1.00E+00	1.00E+00	*	1.00E+00	4.14E+00	1.00E+00	1.00E+00	4.66E+00	2.53E-01	*	*	*	*	*	*		*
#VALUE!	#VALUE!	#VALUE!	#VALUE!		#VALUE!	#VALUE!	#VALUE!	#VALUE!	#VALUE!	#VALUE!	#VALUE!				2.54E-01	2.54E-01	1.00E+00	1.00E+00	1.00E+00	*	1.00E+00	4.16E+00	1.00E+00	1.00E+00	4.70E+00	2.54E-01	*	*	*	*	*	*		*
#VALUE!	#VALUE!	#VALUE!	#VALUE!		#VALUE!	#VALUE!	#VALUE!	#VALUE!	#VALUE!	#VALUE!	#VALUE!				2.55E-01	2.55E-01	1.00E+00	1.00E+00	1.00E+00	*	1.00E+00	4.19E+00	1.00E+00	1.00E+00	4.75E+00	2.55E-01	*	*	*	*	*	*		*
#VALUE!	#VALUE!	#VALUE!	#VALUE!		#VALUE!	#VALUE!	#VALUE!	#VALUE!	#VALUE!	#VALUE!	#VALUE!				2.57E-01	2.57E-01	1.00E+00	1.00E+00	1.00E+00	*	1.00E+00	4.21E+00	1.00E+00	1.00E+00	4.79E+00	2.57E-01	*	*	*	*	*	*		*
#VALUE!	#VALUE!	#VALUE!	#VALUE!		#VALUE!	#VALUE!	#VALUE!	#VALUE!	#VALUE!	#VALUE!	#VALUE!				2.58E-01	2.58E-01	1.00E+00	1.00E+00	1.00E+00	*	1.00E+00	4.23E+00	1.00E+00	1.00E+00	4.84E+00	2.58E-01	*	*	*	*	*	*		*
#VALUE!	#VALUE!	#VALUE!	#VALUE!		#VALUE!	#VALUE!	#VALUE!	#VALUE!	#VALUE!	#VALUE!	#VALUE!				2.59E-01	2.59E-01	1.00E+00	1.00E+00	1.00E+00	*	1.00E+00	4.25E+00	1.00E+00	1.00E+00	4.88E+00	2.59E-01	*	*	*	*	*	*		*
#VALUE!	#VALUE!	#VALUE!	#VALUE!		#VALUE!	#VALUE!	#VALUE!	#VALUE!	#VALUE!	#VALUE!	#VALUE!				2.61E-01	2.61E-01	1.00E+00	1.00E+00	1.00E+00	*	1.00E+00	4.28E+00	1.00E+00	1.00E+00	4.93E+00	2.61E-01	*	*	*	*	*	*		*
#VALUE!	#VALUE!	#VALUE!	#VALUE!		#VALUE!	#VALUE!	#VALUE!	#VALUE!	#VALUE!	#VALUE!	#VALUE!				2.62E-01	2.62E-01	1.00E+00	1.00E+00	1.00E+00	*	1.00E+00	4.30E+00	1.00E+00	1.00E+00	4.98E+00	2.62E-01	*	*	*	*	*	*		*
#VALUE!	#VALUE!	#VALUE!	#VALUE!		#VALUE!	#VALUE!	#VALUE!	#VALUE!	#VALUE!	#VALUE!	#VALUE!				2.63E-01	2.63E-01	1.00E+00	1.00E+00	1.00E+00	*	1.00E+00	4.32E+00	1.00E+00	1.00E+00	5.02E+00	2.63E-01	*	*	*	*	*	*		*
#VALUE!	#VALUE!	#VALUE!	#VALUE!		#VALUE!	#VALUE!	#VALUE!	#VALUE!	#VALUE!	#VALUE!	#VALUE!				2.64E-01	2.64E-01	1.00E+00	1.00E+00	1.00E+00	*	1.00E+00	4.34E+00	1.00E+00	1.00E+00	5.07E+00	2.64E-01	*	*	*	*	*	*		*
#VALUE!	#VALUE!	#VALUE!	#VALUE!		#VALUE!	#VALUE!	#VALUE!	#VALUE!	#VALUE!	#VALUE!	#VALUE!				2.66E-01	2.66E-01	1.00E+00	1.00E+00	1.00E+00	*	1.00E+00	4.37E+00	1.00E+00	1.00E+00	5.12E+00	2.66E-01	*	*	*	*	*	*		*
#VALUE!	#VALUE!	#VALUE!	#VALUE!		#VALUE!	#VALUE!	#VALUE!	#VALUE!	#VALUE!	#VALUE!	#VALUE!				2.67E-01	2.67E-01	1.00E+00	1.00E+00	1.00E+00	*	1.00E+00	4.39E+00	1.00E+00	1.00E+00	5.17E+00	2.67E-01	*	*	*	*	*	*		*
#VALUE!	#VALUE!	#VALUE!	#VALUE!		#VALUE!	#VALUE!	#VALUE!	#VALUE!	#VALUE!	#VALUE!	#VALUE!				2.68E-01	2.68E-01	1.00E+00	1.00E+00	1.00E+00	*	1.00E+00	4.41E+00	1.00E+00	1.00E+00	5.22E+00	2.68E-01	*	*	*	*	*	*		*
#VALUE!	#VALUE!	#VALUE!	#VALUE!		#VALUE!	#VALUE!	#VALUE!	#VALUE!	#VALUE!	#VALUE!	#VALUE!				2.69E-01	2.69E-01	1.00E+00	1.00E+00	1.00E+00	*	1.00E+00	4.43E+00	1.00E+00	1.00E+00	5.27E+00	2.69E-01	*	*	*	*	*	*		*
#VALUE!	#VALUE!	#VALUE!	#VALUE!		#VALUE!	#VALUE!	#VALUE!	#VALUE!	#VALUE!	#VALUE!	#VALUE!				2.71E-01	2.71E-01	1.00E+00	1.00E+00	1.00E+00	*	1.00E+00	4.46E+00	1.00E+00	1.00E+00	5.33E+00	2.71E-01	*	*	*	*	*	*		*
#VALUE!	#VALUE!	#VALUE!	#VALUE!		#VALUE!	#VALUE!	#VALUE!	#VALUE!	#VALUE!	#VALUE!	#VALUE!				2.72E-01	2.72E-01	1.00E+00	1.00E+00	1.00E+00	*	1.00E+00	4.48E+00	1.00E+00	1.00E+00	5.38E+00	2.72E-01	*	*	*	*	*	*		*
#VALUE!	#VALUE!	#VALUE!	#VALUE!		#VALUE!	#VALUE!	#VALUE!	#VALUE!	#VALUE!	#VALUE!	#VALUE!				2.73E-01	2.73E-01	1.00E+00	1.00E+00	1.00E+00	*	1.00E+00	4.50E+00	1.00E+00	1.00E+00	5.43E+00	2.73E-01	*	*	*	*	*	*		*
#VALUE!	#VALUE!	#VALUE!	#VALUE!		#VALUE!	#VALUE!	#VALUE!	#VALUE!	#VALUE!	#VALUE!	#VALUE!				2.75E-01	2.75E-01	1.00E+00	1.00E+00	1.00E+00	*	1.00E+00	4.52E+00	1.00E+00	1.00E+00	5.49E+00	2.75E-01	*	*	*	*	*	*		*
#VALUE!	#VALUE!	#VALUE!	#VALUE!		#VALUE!	#VALUE!	#VALUE!	#VALUE!	#VALUE!	#VALUE!	#VALUE!				2.76E-01	2.76E-01	1.00E+00	1.00E+00	1.00E+00	*	1.00E+00	4.55E+00	1.00E+00	1.00E+00	5.54E+00	2.76E-01	*	*	*	*	*	*		*
#VALUE!	#VALUE!	#VALUE!	#VALUE!		#VALUE!	#VALUE!	#VALUE!	#VALUE!	#VALUE!	#VALUE!	#VALUE!				2.77E-01	2.77E-01	1.00E+00	1.00E+00	1.00E+00	*	1.00E+00	4.57E+00	1.00E+00	1.00E+00	5.60E+00	2.77E-01	*	*	*	*	*	*		*
#VALUE!	#VALUE!	#VALUE!	#VALUE!		#VALUE!	#VALUE!	#VALUE!	#VALUE!	#VALUE!	#VALUE!	#VALUE!				2.78E-01	2.78E-01	1.00E+00	1.00E+00	1.00E+00	*	1.00E+00	4.59E+00	1.00E+00	1.00E+00	5.66E+00	2.78E-01	*	*	*	*	*	*		*
#VALUE!	#VALUE!	#VALUE!	#VALUE!		#VALUE!	#VALUE!	#VALUE!	#VALUE!	#VALUE!	#VALUE!	#VALUE!				2.80E-01	2.80E-01	1.00E+00	1.00E+00	1.00E+00	*	1.00E+00	4.61E+00	1.00E+00	1.00E+00	5.71E+00	2.80E-01	*	*	*	*	*	*		*
#VALUE!	#VALUE!	#VALUE!	#VALUE!		#VALUE!	#VALUE!	#VALUE!	#VALUE!	#VALUE!	#VALUE!	#VALUE!				2.81E-01	2.81E-01	1.00E+00	1.00E+00	1.00E+00	*	1.00E+00	4.64E+00	1.00E+00	1.00E+00	5.77E+00	2.81E-01	*	*	*	*	*	*		*
#VALUE!	#VALUE!	#VALUE!	#VALUE!		#VALUE!	#VALUE!	#VALUE!	#VALUE!	#VALUE!	#VALUE!	#VALUE!				2.82E-01	2.82E-01	1.00E+00	1.00E+00	1.00E+00	*	1.00E+00	4.66E+00	1.00E+00	1.00E+00	5.83E+00	2.82E-01	*	*	*	*	*	*		*
#VALUE!	#VALUE!	#VALUE!	#VALUE!		#VALUE!	#VALUE!	#VALUE!	#VALUE!	#VALUE!	#VALUE!	#VALUE!				2.83E-01	2.83E-01	1.00E+00	1.00E+00	1.00E+00	*	1.00E+00	4.68E+00	1.00E+00	1.00E+00	5.89E+00	2.83E-01	*	*	*	*	*	*		*
#VALUE!	#VALUE!	#VALUE!	#VALUE!		#VALUE!	#VALUE!	#VALUE!	#VALUE!	#VALUE!	#VALUE!	#VALUE!				2.85E-01	2.85E-01	1.00E+00	1.00E+00	1.00E+00	*	1.00E+00	4.71E+00	1.00E+00	1.00E+00	5.96E+00	2.85E-01	*	*	*	*	*	*		*
#VALUE!	#VALUE!	#VALUE!	#VALUE!		#VALUE!	#VALUE!	#VALUE!	#VALUE!	#VALUE!	#VALUE!	#VALUE!				2.86E-01	2.86E-01	1.00E+00	1.00E+00	1.00E+00	*	1.00E+00	4.73E+00	1.00E+00	1.00E+00	6.02E+00	2.86E-01	*	*	*	*	*	*		*
#VALUE!	#VALUE!	#VALUE!	#VALUE!		#VALUE!	#VALUE!	#VALUE!	#VALUE!	#VALUE!	#VALUE!	#VALUE!				2.87E-01	2.87E-01	1.00E+00	1.00E+00	1.00E+00	*	1.00E+00	4.75E+00	1.00E+00	1.00E+00	6.08E+00	2.87E-01	*	*	*	*	*	*		*
#VALUE!	#VALUE!	#VALUE!	#VALUE!		#VALUE!	#VALUE!	#VALUE!	#VALUE!	#VALUE!	#VALUE!	#VALUE!				2.89E-01	2.89E-01	1.00E+00	1.00E+00	1.00E+00	*	1.00E+00	4.77E+00	1.00E+00	1.00E+00	6.15E+00	2.89E-01	*	*	*	*	*	*		*
#VALUE!	#VALUE!	#VALUE!	#VALUE!		#VALUE!	#VALUE!	#VALUE!	#VALUE!	#VALUE!	#VALUE!	#VALUE!				2.90E-01	2.90E-01	1.00E+00	1.00E+00	1.00E+00	*	1.00E+00	4.80E+00	1.00E+00	1.00E+00	6.21E+00	2.90E-01	*	*	*	*	*	*		*
#VALUE!	#VALUE!	#VALUE!	#VALUE!		#VALUE!	#VALUE!	#VALUE!	#VALUE!	#VALUE!	#VALUE!	#VALUE!				2.91E-01	2.91E-01	1.00E+00	1.00E+00	1.00E+00	*	1.00E+00	4.82E+00	1.00E+00	1.00E+00	6.28E+00	2.91E-01	*	*	*	*	*	*		*
#VALUE!	#VALUE!	#VALUE!	#VALUE!		#VALUE!	#VALUE!	#VALUE!	#VALUE!	#VALUE!	#VALUE!	#VALUE!				2.92E-01	2.92E-01	1.00E+00	1.00E+00	1.00E+00	*	1.00E+00	4.84E+00	1.00E+00	1.00E+00	6.35E+00	2.92E-01	*	*	*	*	*	*		*
#VALUE!	#VALUE!	#VALUE!	#VALUE!		#VALUE!	#VALUE!	#VALUE!	#VALUE!	#VALUE!	#VALUE!	#VALUE!				2.94E-01	2.94E-01	1.00E+00	1.00E+00	1.00E+00	*	1.00E+00	4.87E+00	1.00E+00	1.00E+00	6.42E+00	2.94E-01	*	*	*	*	*	*		*
#VALUE!	#VALUE!	#VALUE!	#VALUE!		#VALUE!	#VALUE!	#VALUE!	#VALUE!	#VALUE!	#VALUE!	#VALUE!				2.95E-01	2.95E-01	1.00E+00	1.00E+00	1.00E+00	*	1.00E+00	4.89E+00	1.00E+00	1.00E+00	6.49E+00	2.95E-01	*	*	*	*	*	*		*
#VALUE!	#VALUE!	#VALUE!	#VALUE!		#VALUE!	#VALUE!	#VALUE!	#VALUE!	#VALUE!	#VALUE!	#VALUE!				2.96E-01	2.96E-01	1.00E+00	1.00E+00	1.00E+00	*	1.00E+00	4.91E+00	1.00E+00	1.00E+00	6.56E+00	2.96E-01	*	*	*	*	*	*		*
#VALUE!	#VALUE!	#VALUE!	#VALUE!		#VALUE!	#VALUE!	#VALUE!	#VALUE!	#VALUE!	#VALUE!	#VALUE!				2.97E-01	2.97E-01	1.00E+00	1.00E+00	1.00E+00	*	1.00E+00	4.94E+00	1.00E+00	1.00E+00	6.64E+00	2.97E-01	*	*	*	*	*	*		*
#VALUE!	#VALUE!	#VALUE!	#VALUE!		#VALUE!	#VALUE!	#VALUE!	#VALUE!	#VALUE!	#VALUE!	#VALUE!				2.99E-01	2.99E-01	1.00E+00	1.00E+00	1.00E+00	*	1.00E+00	4.96E+00	1.00E+00	1.00E+00	6.71E+00	2.99E-01	*	*	*	*	*	*		*
#VALUE!	#VALUE!	#VALUE!	#VALUE!		#VALUE!	#VALUE!	#VALUE!	#VALUE!	#VALUE!	#VALUE!	#VALUE!				3.00E-01	3.00E-01	1.00E+00	1.00E+00	1.00E+00	*	1.00E+00	4.98E+00	1.00E+00	1.00E+00	6.79E+00	3.00E-01	*	*	*	*	*	*		*
#VALUE!	#VALUE!	#VALUE!	#VALUE!		#VALUE!	#VALUE!	#VALUE!	#VALUE!	#VALUE!	#VALUE!	#VALUE!				0.00E+00												1.00E+00	1.00E+00	*	1.00E+00	*	*		*
#VALUE!	#VALUE!	#VALUE!	#VALUE!		#VALUE!	#VALUE!	#VALUE!	#VALUE!	#VALUE!	#VALUE!	#VALUE!				0.00E+00												1.00E+00	1.00E+00	*	1.00E+00	*	*		*
#VALUE!	#VALUE!	#VALUE!	#VALUE!		#VALUE!	#VALUE!	#VALUE!	#VALUE!	#VALUE!	#VALUE!	#VALUE!				1.87E-01										3.01E+00	1.87E-01	1.00E+00	1.00E+00	*	1.00E+00	*	*	3.76E-03	*
#VALUE!	#VALUE!	#VALUE!	#VALUE!		#VALUE!	#VALUE!	#VALUE!	#VALUE!	#VALUE!	#VALUE!	#VALUE!				0.00E+00												1.00E+00	1.00E+00	*	1.00E+00	*	*		*
#VALUE!	#VALUE!	#VALUE!	#VALUE!		#VALUE!	#VALUE!	#VALUE!	#VALUE!	#VALUE!	#VALUE!	#VALUE!				0.00E+00												1.00E+00	1.00E+00	*	1.00E+00	*	*		*
#VALUE!	#VALUE!	#VALUE!	#VALUE!		#VALUE!	#VALUE!	#VALUE!	#VALUE!	#VALUE!	#VALUE!	#VALUE!				0.00E+00												1.00E+00	1.00E+00	*	1.00E+00	*	*		*
#VALUE!	#VALUE!	#VALUE!	#VALUE!		#VALUE!	#VALUE!	#VALUE!	#VALUE!	#VALUE!	#VALUE!	#VALUE!				0.00E+00												1.00E+00	1.00E+00	*	1.00E+00	*	*		*
#VALUE!	#VALUE!	#VALUE!	#VALUE!		#VALUE!	#VALUE!	#VALUE!	#VALUE!	#VALUE!	#VALUE!	#VALUE!				0.00E+00												1.00E+00	1.00E+00	*	1.00E+00	*	*		*
#VALUE!	#VALUE!	#VALUE!	#VALUE!		#VALUE!	#VALUE!	#VALUE!	#VALUE!	#VALUE!	#VALUE!	#VALUE!				0.00E+00												1.00E+00	1.00E+00	*	1.00E+00	*	*		*
#VALUE!	#VALUE!	#VALUE!	#VALUE!		#VALUE!	#VALUE!	#VALUE!	#VALUE!	#VALUE!	#VALUE!	#VALUE!				0.00E+00															1.00E+00	*	*		*
#VALUE!	#VALUE!	#VALUE!	#VALUE!		#VALUE!	#VALUE!	#VALUE!	#VALUE!	#VALUE!	#VALUE!	#VALUE!														#VALUE!	#VALUE!									#VALUE!
#VALUE!	#VALUE!	#VALUE!	#VALUE!		#VALUE!	#VALUE!	#VALUE!	#VALUE!	#VALUE!	#VALUE!	#VALUE!														#VALUE!	#VALUE!									#VALUE!
#VALUE!	#VALUE!	#VALUE!	#VALUE!		#VALUE!	#VALUE!	#VALUE!	#VALUE!	#VALUE!	#VALUE!	#VALUE!														#VALUE!	#VALUE!									#VALUE!
#VALUE!	#VALUE!	#VALUE!	#VALUE!		#VALUE!	#VALUE!	#VALUE!	#VALUE!	#VALUE!	#VALUE!	#VALUE!														#VALUE!	#VALUE!									#VALUE!
#VALUE!	#VALUE!	#VALUE!	#VALUE!		#VALUE!	#VALUE!	#VALUE!	#VALUE!	#VALUE!	#VALUE!	#VALUE!														#VALUE!	#VALUE!									#VALUE!
#VALUE!	#VALUE!	#VALUE!	#VALUE!		#VALUE!	#VALUE!	#VALUE!	#VALUE!	#VALUE!	#VALUE!	#VALUE!														#VALUE!	#VALUE!									#VALUE!
#VALUE!	#VALUE!	#VALUE!	#VALUE!		#VALUE!	#VALUE!	#VALUE!	#VALUE!	#VALUE!	#VALUE!	#VALUE!														#VALUE!	#VALUE!									#VALUE!
#VALUE!	#VALUE!	#VALUE!	#VALUE!		#VALUE!	#VALUE!	#VALUE!	#VALUE!	#VALUE!	#VALUE!	#VALUE!														#VALUE!	#VALUE!									#VALUE!
#VALUE!	#VALUE!	#VALUE!	#VALUE!		#VALUE!	#VALUE!	#VALUE!	#VALUE!	#VALUE!	#VALUE!	#VALUE!														#VALUE!	#VALUE!									#VALUE!
#VALUE!	#VALUE!	#VALUE!	#VALUE!		#VALUE!	#VALUE!	#VALUE!	#VALUE!	#VALUE!	#VALUE!	#VALUE!														#VALUE!	#VALUE!									#VALUE!
#VALUE!	#VALUE!	#VALUE!	#VALUE!		#VALUE!	#VALUE!	#VALUE!	#VALUE!	#VALUE!	#VALUE!	#VALUE!														#VALUE!	#VALUE!									#VALUE!
#VALUE!	#VALUE!	#VALUE!	#VALUE!		#VALUE!	#VALUE!	#VALUE!	#VALUE!	#VALUE!	#VALUE!	#VALUE!														#VALUE!	#VALUE!									#VALUE!
#VALUE!	#VALUE!	#VALUE!	#VALUE!		#VALUE!	#VALUE!	#VALUE!	#VALUE!	#VALUE!	#VALUE!	#VALUE!														#VALUE!	#VALUE!									#VALUE!
#VALUE!	#VALUE!	#VALUE!	#VALUE!		#VALUE!	#VALUE!	#VALUE!	#VALUE!	#VALUE!	#VALUE!	#VALUE!														#VALUE!	#VALUE!									#VALUE!
#VALUE!	#VALUE!	#VALUE!	#VALUE!		#VALUE!	#VALUE!	#VALUE!	#VALUE!	#VALUE!	#VALUE!	#VALUE!														#VALUE!	#VALUE!									#VALUE!
#VALUE!	#VALUE!	#VALUE!	#VALUE!		#VALUE!	#VALUE!	#VALUE!	#VALUE!	#VALUE!	#VALUE!	#VALUE!														#VALUE!	#VALUE!									#VALUE!
#VALUE!	#VALUE!	#VALUE!	#VALUE!		#VALUE!	#VALUE!	#VALUE!	#VALUE!	#VALUE!	#VALUE!	#VALUE!														#VALUE!	#VALUE!									#VALUE!
#VALUE!	#VALUE!	#VALUE!	#VALUE!		#VALUE!	#VALUE!	#VALUE!	#VALUE!	#VALUE!	#VALUE!	#VALUE!														#VALUE!	#VALUE!									#VALUE!
#VALUE!	#VALUE!	#VALUE!	#VALUE!		#VALUE!	#VALUE!	#VALUE!	#VALUE!	#VALUE!	#VALUE!	#VALUE!														#VALUE!	#VALUE!									#VALUE!
#VALUE!	#VALUE!	#VALUE!	#VALUE!		#VALUE!	#VALUE!	#VALUE!	#VALUE!	#VALUE!	#VALUE!	#VALUE!														#VALUE!	#VALUE!									#VALUE!
#VALUE!	#VALUE!	#VALUE!	#VALUE!		#VALUE!	#VALUE!	#VALUE!	#VALUE!	#VALUE!	#VALUE!	#VALUE!														#VALUE!	#VALUE!									#VALUE!
#VALUE!	#VALUE!	#VALUE!	#VALUE!		#VALUE!	#VALUE!	#VALUE!	#VALUE!	#VALUE!	#VALUE!	#VALUE!														#VALUE!	#VALUE!									#VALUE!
#VALUE!	#VALUE!	#VALUE!	#VALUE!		#VALUE!	#VALUE!	#VALUE!	#VALUE!	#VALUE!	#VALUE!	#VALUE!														#VALUE!	#VALUE!									#VALUE!
#VALUE!	#VALUE!	#VALUE!	#VALUE!		#VALUE!	#VALUE!	#VALUE!	#VALUE!	#VALUE!	#VALUE!	#VALUE!														#VALUE!	#VALUE!									#VALUE!
#VALUE!	#VALUE!	#VALUE!	#VALUE!		#VALUE!	#VALUE!	#VALUE!	#VALUE!	#VALUE!	#VALUE!	#VALUE!														#VALUE!	#VALUE!									#VALUE!
#VALUE!	#VALUE!	#VALUE!	#VALUE!		#VALUE!	#VALUE!	#VALUE!	#VALUE!	#VALUE!	#VALUE!	#VALUE!														#VALUE!	#VALUE!									#VALUE!
#VALUE!	#VALUE!	#VALUE!	#VALUE!		#VALUE!	#VALUE!	#VALUE!	#VALUE!	#VALUE!	#VALUE!	#VALUE!														#VALUE!	#VALUE!									#VALUE!
#VALUE!	#VALUE!	#VALUE!	#VALUE!		#VALUE!	#VALUE!	#VALUE!	#VALUE!	#VALUE!	#VALUE!	#VALUE!														#VALUE!	#VALUE!									#VALUE!
#VALUE!	#VALUE!	#VALUE!	#VALUE!		#VALUE!	#VALUE!	#VALUE!	#VALUE!	#VALUE!	#VALUE!	#VALUE!														#VALUE!	#VALUE!									#VALUE!
#VALUE!	#VALUE!	#VALUE!	#VALUE!		#VALUE!	#VALUE!	#VALUE!	#VALUE!	#VALUE!	#VALUE!	#VALUE!														#VALUE!	#VALUE!									#VALUE!
#VALUE!	#VALUE!	#VALUE!	#VALUE!		#VALUE!	#VALUE!	#VALUE!	#VALUE!	#VALUE!	#VALUE!	#VALUE!														#VALUE!	#VALUE!									#VALUE!
#VALUE!	#VALUE!	#VALUE!	#VALUE!		#VALUE!	#VALUE!	#VALUE!	#VALUE!	#VALUE!	#VALUE!	#VALUE!														#VALUE!	#VALUE!									#VALUE!
#VALUE!	#VALUE!	#VALUE!	#VALUE!		#VALUE!	#VALUE!	#VALUE!	#VALUE!	#VALUE!	#VALUE!	#VALUE!														#VALUE!	#VALUE!									#VALUE!
#VALUE!	#VALUE!	#VALUE!	#VALUE!		#VALUE!	#VALUE!	#VALUE!	#VALUE!	#VALUE!	#VALUE!	#VALUE!														#VALUE!	#VALUE!									#VALUE!
#VALUE!	#VALUE!	#VALUE!	#VALUE!		#VALUE!	#VALUE!	#VALUE!	#VALUE!	#VALUE!	#VALUE!	#VALUE!														#VALUE!	#VALUE!									#VALUE!
#VALUE!	#VALUE!	#VALUE!	#VALUE!		#VALUE!	#VALUE!	#VALUE!	#VALUE!	#VALUE!	#VALUE!	#VALUE!														#VALUE!	#VALUE!									#VALUE!
#VALUE!	#VALUE!	#VALUE!	#VALUE!		#VALUE!	#VALUE!	#VALUE!	#VALUE!	#VALUE!	#VALUE!	#VALUE!														#VALUE!	#VALUE!									#VALUE!
#VALUE!	#VALUE!	#VALUE!	#VALUE!		#VALUE!	#VALUE!	#VALUE!	#VALUE!	#VALUE!	#VALUE!	#VALUE!														#VALUE!	#VALUE!									#VALUE!
#VALUE!	#VALUE!	#VALUE!	#VALUE!		#VALUE!	#VALUE!	#VALUE!	#VALUE!	#VALUE!	#VALUE!	#VALUE!														#VALUE!	#VALUE!									#VALUE!
#VALUE!	#VALUE!	#VALUE!	#VALUE!		#VALUE!	#VALUE!	#VALUE!	#VALUE!	#VALUE!	#VALUE!	#VALUE!														#VALUE!	#VALUE!									#VALUE!
#VALUE!	#VALUE!	#VALUE!	#VALUE!		#VALUE!	#VALUE!	#VALUE!	#VALUE!	#VALUE!	#VALUE!	#VALUE!														#VALUE!	#VALUE!									#VALUE!
#VALUE!	#VALUE!	#VALUE!	#VALUE!		#VALUE!	#VALUE!	#VALUE!	#VALUE!	#VALUE!	#VALUE!	#VALUE!														#VALUE!	#VALUE!									#VALUE!
#VALUE!	#VALUE!	#VALUE!	#VALUE!		#VALUE!	#VALUE!	#VALUE!	#VALUE!	#VALUE!	#VALUE!	#VALUE!														#VALUE!	#VALUE!									#VALUE!
#VALUE!	#VALUE!	#VALUE!	#VALUE!		#VALUE!	#VALUE!	#VALUE!	#VALUE!	#VALUE!	#VALUE!	#VALUE!														#VALUE!	#VALUE!									#VALUE!
#VALUE!	#VALUE!	#VALUE!	#VALUE!		#VALUE!	#VALUE!	#VALUE!	#VALUE!	#VALUE!	#VALUE!	#VALUE!														#VALUE!	#VALUE!									#VALUE!
#VALUE!	#VALUE!	#VALUE!	#VALUE!		#VALUE!	#VALUE!	#VALUE!	#VALUE!	#VALUE!	#VALUE!	#VALUE!														#VALUE!	#VALUE!									#VALUE!
#VALUE!	#VALUE!	#VALUE!	#VALUE!		#VALUE!	#VALUE!	#VALUE!	#VALUE!	#VALUE!	#VALUE!	#VALUE!														#VALUE!	#VALUE!									#VALUE!
#VALUE!	#VALUE!	#VALUE!	#VALUE!		#VALUE!	#VALUE!	#VALUE!	#VALUE!	#VALUE!	#VALUE!	#VALUE!														#VALUE!	#VALUE!									#VALUE!
#VALUE!	#VALUE!	#VALUE!	#VALUE!		#VALUE!	#VALUE!	#VALUE!	#VALUE!	#VALUE!	#VALUE!	#VALUE!														#VALUE!	#VALUE!									#VALUE!
#VALUE!	#VALUE!	#VALUE!	#VALUE!		#VALUE!	#VALUE!	#VALUE!	#VALUE!	#VALUE!	#VALUE!	#VALUE!														#VALUE!	#VALUE!									#VALUE!
#VALUE!	#VALUE!	#VALUE!	#VALUE!		#VALUE!	#VALUE!	#VALUE!	#VALUE!	#VALUE!	#VALUE!	#VALUE!														#VALUE!	#VALUE!									#VALUE!
#VALUE!	#VALUE!	#VALUE!	#VALUE!		#VALUE!	#VALUE!	#VALUE!	#VALUE!	#VALUE!	#VALUE!	#VALUE!														#VALUE!	#VALUE!									#VALUE!
#VALUE!	#VALUE!	#VALUE!	#VALUE!		#VALUE!	#VALUE!	#VALUE!	#VALUE!	#VALUE!	#VALUE!	#VALUE!														#VALUE!	#VALUE!									#VALUE!
#VALUE!	#VALUE!	#VALUE!	#VALUE!		#VALUE!	#VALUE!	#VALUE!	#VALUE!	#VALUE!	#VALUE!	#VALUE!														#VALUE!	#VALUE!									#VALUE!
#VALUE!	#VALUE!	#VALUE!	#VALUE!		#VALUE!	#VALUE!	#VALUE!	#VALUE!	#VALUE!	#VALUE!	#VALUE!														#VALUE!	#VALUE!									#VALUE!
#VALUE!	#VALUE!	#VALUE!	#VALUE!		#VALUE!	#VALUE!	#VALUE!	#VALUE!	#VALUE!	#VALUE!	#VALUE!														#VALUE!	#VALUE!									#VALUE!
#VALUE!	#VALUE!	#VALUE!	#VALUE!		#VALUE!	#VALUE!	#VALUE!	#VALUE!	#VALUE!	#VALUE!	#VALUE!														#VALUE!	#VALUE!									#VALUE!
#VALUE!	#VALUE!	#VALUE!	#VALUE!		#VALUE!	#VALUE!	#VALUE!	#VALUE!	#VALUE!	#VALUE!	#VALUE!														#VALUE!	#VALUE!									#VALUE!
#VALUE!	#VALUE!	#VALUE!	#VALUE!		#VALUE!	#VALUE!	#VALUE!	#VALUE!	#VALUE!	#VALUE!	#VALUE!														#VALUE!	#VALUE!									#VALUE!
#VALUE!	#VALUE!	#VALUE!	#VALUE!		#VALUE!	#VALUE!	#VALUE!	#VALUE!	#VALUE!	#VALUE!	#VALUE!														#VALUE!	#VALUE!									#VALUE!
#VALUE!	#VALUE!	#VALUE!	#VALUE!		#VALUE!	#VALUE!	#VALUE!	#VALUE!	#VALUE!	#VALUE!	#VALUE!														#VALUE!	#VALUE!									#VALUE!
#VALUE!	#VALUE!	#VALUE!	#VALUE!		#VALUE!	#VALUE!	#VALUE!	#VALUE!	#VALUE!	#VALUE!	#VALUE!														#VALUE!	#VALUE!									#VALUE!
#VALUE!	#VALUE!	#VALUE!	#VALUE!		#VALUE!	#VALUE!	#VALUE!	#VALUE!	#VALUE!	#VALUE!	#VALUE!														#VALUE!	#VALUE!									#VALUE!
#VALUE!	#VALUE!	#VALUE!	#VALUE!		#VALUE!	#VALUE!	#VALUE!	#VALUE!	#VALUE!	#VALUE!	#VALUE!														#VALUE!	#VALUE!									#VALUE!
#VALUE!	#VALUE!	#VALUE!	#VALUE!		#VALUE!	#VALUE!	#VALUE!	#VALUE!	#VALUE!	#VALUE!	#VALUE!														#VALUE!	#VALUE!									#VALUE!
#VALUE!	#VALUE!	#VALUE!	#VALUE!		#VALUE!	#VALUE!	#VALUE!	#VALUE!	#VALUE!	#VALUE!	#VALUE!														#VALUE!	#VALUE!									#VALUE!
#VALUE!	#VALUE!	#VALUE!	#VALUE!		#VALUE!	#VALUE!	#VALUE!	#VALUE!	#VALUE!	#VALUE!	#VALUE!														#VALUE!	#VALUE!									#VALUE!
#VALUE!	#VALUE!	#VALUE!	#VALUE!		#VALUE!	#VALUE!	#VALUE!	#VALUE!	#VALUE!	#VALUE!	#VALUE!														#VALUE!	#VALUE!									#VALUE!
#VALUE!	#VALUE!	#VALUE!	#VALUE!		#VALUE!	#VALUE!	#VALUE!	#VALUE!	#VALUE!	#VALUE!	#VALUE!														#VALUE!	#VALUE!									#VALUE!
#VALUE!	#VALUE!	#VALUE!	#VALUE!		#VALUE!	#VALUE!	#VALUE!	#VALUE!	#VALUE!	#VALUE!	#VALUE!														#VALUE!	#VALUE!									#VALUE!
#VALUE!	#VALUE!	#VALUE!	#VALUE!		#VALUE!	#VALUE!	#VALUE!	#VALUE!	#VALUE!	#VALUE!	#VALUE!														#VALUE!	#VALUE!									#VALUE!
#VALUE!	#VALUE!	#VALUE!	#VALUE!		#VALUE!	#VALUE!	#VALUE!	#VALUE!	#VALUE!	#VALUE!	#VALUE!														#VALUE!	#VALUE!									#VALUE!
#VALUE!	#VALUE!	#VALUE!	#VALUE!		#VALUE!	#VALUE!	#VALUE!	#VALUE!	#VALUE!	#VALUE!	#VALUE!														#VALUE!	#VALUE!									#VALUE!
#VALUE!	#VALUE!	#VALUE!	#VALUE!		#VALUE!	#VALUE!	#VALUE!	#VALUE!	#VALUE!	#VALUE!	#VALUE!														#VALUE!	#VALUE!									#VALUE!
#VALUE!	#VALUE!	#VALUE!	#VALUE!		#VALUE!	#VALUE!	#VALUE!	#VALUE!	#VALUE!	#VALUE!	#VALUE!														#VALUE!	#VALUE!									#VALUE!
#VALUE!	#VALUE!	#VALUE!	#VALUE!		#VALUE!	#VALUE!	#VALUE!	#VALUE!	#VALUE!	#VALUE!	#VALUE!														#VALUE!	#VALUE!									#VALUE!
#VALUE!	#VALUE!	#VALUE!	#VALUE!		#VALUE!	#VALUE!	#VALUE!	#VALUE!	#VALUE!	#VALUE!	#VALUE!														#VALUE!	#VALUE!									#VALUE!
#VALUE!	#VALUE!	#VALUE!	#VALUE!		#VALUE!	#VALUE!	#VALUE!	#VALUE!	#VALUE!	#VALUE!	#VALUE!														#VALUE!	#VALUE!									#VALUE!
#VALUE!	#VALUE!	#VALUE!	#VALUE!		#VALUE!	#VALUE!	#VALUE!	#VALUE!	#VALUE!	#VALUE!	#VALUE!														#VALUE!	#VALUE!									#VALUE!
#VALUE!	#VALUE!	#VALUE!	#VALUE!		#VALUE!	#VALUE!	#VALUE!	#VALUE!	#VALUE!	#VALUE!	#VALUE!														#VALUE!	#VALUE!									#VALUE!
#VALUE!	#VALUE!	#VALUE!	#VALUE!		#VALUE!	#VALUE!	#VALUE!	#VALUE!	#VALUE!	#VALUE!	#VALUE!														#VALUE!	#VALUE!									#VALUE!
#VALUE!	#VALUE!	#VALUE!	#VALUE!		#VALUE!	#VALUE!	#VALUE!	#VALUE!	#VALUE!	#VALUE!	#VALUE!														#VALUE!	#VALUE!									#VALUE!
#VALUE!	#VALUE!	#VALUE!	#VALUE!		#VALUE!	#VALUE!	#VALUE!	#VALUE!	#VALUE!	#VALUE!	#VALUE!														#VALUE!	#VALUE!									#VALUE!
#VALUE!	#VALUE!	#VALUE!	#VALUE!		#VALUE!	#VALUE!	#VALUE!	#VALUE!	#VALUE!	#VALUE!	#VALUE!														#VALUE!	#VALUE!									#VALUE!
#VALUE!	#VALUE!	#VALUE!	#VALUE!		#VALUE!	#VALUE!	#VALUE!	#VALUE!	#VALUE!	#VALUE!	#VALUE!														#VALUE!	#VALUE!									#VALUE!
#VALUE!	#VALUE!	#VALUE!	#VALUE!		#VALUE!	#VALUE!	#VALUE!	#VALUE!	#VALUE!	#VALUE!	#VALUE!														#VALUE!	#VALUE!									#VALUE!
#VALUE!	#VALUE!	#VALUE!	#VALUE!		#VALUE!	#VALUE!	#VALUE!	#VALUE!	#VALUE!	#VALUE!	#VALUE!														#VALUE!	#VALUE!									#VALUE!
#VALUE!	#VALUE!	#VALUE!	#VALUE!		#VALUE!	#VALUE!	#VALUE!	#VALUE!	#VALUE!	#VALUE!	#VALUE!														#VALUE!	#VALUE!									#VALUE!
#VALUE!	#VALUE!	#VALUE!	#VALUE!		#VALUE!	#VALUE!	#VALUE!	#VALUE!	#VALUE!	#VALUE!	#VALUE!														#VALUE!	#VALUE!									#VALUE!
#VALUE!	#VALUE!	#VALUE!	#VALUE!		#VALUE!	#VALUE!	#VALUE!	#VALUE!	#VALUE!	#VALUE!	#VALUE!														#VALUE!	#VALUE!									#VALUE!
									0.00E+00																#VALUE!	#VALUE!									#VALUE!
																									#VALUE!	#VALUE!									#VALUE!
																									#VALUE!	#VALUE!									#VALUE!
																									#VALUE!	#VALUE!									#VALUE!
																									#VALUE!	#VALUE!									#VALUE!
																									#VALUE!	#VALUE!									#VALUE!
																									#VALUE!	#VALUE!									#VALUE!
																									#VALUE!	#VALUE!									#VALUE!
																									#VALUE!	#VALUE!									#VALUE!
																									#VALUE!	#VALUE!									#VALUE!
																									#VALUE!	#VALUE!									#VALUE!
																									#VALUE!	#VALUE!									#VALUE!
																									#VALUE!	#VALUE!									#VALUE!
																									#VALUE!	#VALUE!									#VALUE!
																									#VALUE!	#VALUE!									#VALUE!
																									#VALUE!	#VALUE!									#VALUE!
																									#VALUE!	#VALUE!									#VALUE!
																									#VALUE!	#VALUE!									#VALUE!
																									#VALUE!	#VALUE!									#VALUE!
																									#VALUE!	#VALUE!									#VALUE!
																									#VALUE!	#VALUE!									#VALUE!
																									#VALUE!	#VALUE!									#VALUE!
																									#VALUE!	#VALUE!									#VALUE!
																									#VALUE!	#VALUE!									#VALUE!
																									#VALUE!	#VALUE!									#VALUE!
																									#VALUE!	#VALUE!									#VALUE!
																									#VALUE!	#VALUE!									#VALUE!
																									#VALUE!	#VALUE!									#VALUE!
																									#VALUE!	#VALUE!									#VALUE!
																									#VALUE!	#VALUE!									#VALUE!
																									#VALUE!	#VALUE!									#VALUE!
																									#VALUE!	#VALUE!									#VALUE!
																									#VALUE!	#VALUE!									#VALUE!
																									#VALUE!	#VALUE!									#VALUE!
																									#VALUE!	#VALUE!									#VALUE!
																									#VALUE!	#VALUE!									#VALUE!
																									#VALUE!	#VALUE!									#VALUE!
																									#VALUE!	#VALUE!									#VALUE!
																									#VALUE!	#VALUE!									#VALUE!
																									#VALUE!	#VALUE!									#VALUE!
																									#VALUE!	#VALUE!									#VALUE!
																									#VALUE!	#VALUE!									#VALUE!
																									#VALUE!	#VALUE!									#VALUE!
																									#VALUE!	#VALUE!									#VALUE!
																									#VALUE!	#VALUE!									#VALUE!
																									#VALUE!	#VALUE!									#VALUE!
																									#VALUE!	#VALUE!									#VALUE!
																									#VALUE!	#VALUE!									#VALUE!
																									#VALUE!	#VALUE!									#VALUE!
																									#VALUE!	#VALUE!									#VALUE!
																									#VALUE!	#VALUE!									#VALUE!
																									#VALUE!	#VALUE!									#VALUE!
																									#VALUE!	#VALUE!									#VALUE!
																									#VALUE!	#VALUE!									#VALUE!
																									#VALUE!	#VALUE!									#VALUE!
																									#VALUE!	#VALUE!									#VALUE!
																									#VALUE!	#VALUE!									#VALUE!
																									#VALUE!	#VALUE!									#VALUE!
																									#VALUE!	#VALUE!									#VALUE!
																									#VALUE!	#VALUE!									#VALUE!
																									#VALUE!	#VALUE!									#VALUE!
																									#VALUE!	#VALUE!									#VALUE!
																									#VALUE!	#VALUE!									#VALUE!
																									#VALUE!	#VALUE!									#VALUE!
																									#VALUE!	#VALUE!									#VALUE!
																									#VALUE!	#VALUE!									#VALUE!
																									#VALUE!	#VALUE!									#VALUE!
																									#VALUE!	#VALUE!									#VALUE!
																									#VALUE!	#VALUE!									#VALUE!
																									#VALUE!	#VALUE!									#VALUE!
																									#VALUE!	#VALUE!									#VALUE!
																									#VALUE!	#VALUE!									#VALUE!
																									#VALUE!	#VALUE!									#VALUE!
																									#VALUE!	#VALUE!									#VALUE!
																									#VALUE!	#VALUE!									#VALUE!
																									#VALUE!	#VALUE!									#VALUE!
																									#VALUE!	#VALUE!									#VALUE!
																									#VALUE!	#VALUE!									#VALUE!
																									#VALUE!	#VALUE!									#VALUE!
																									#VALUE!	#VALUE!									#VALUE!
																									#VALUE!	#VALUE!									#VALUE!
																									#VALUE!	#VALUE!									#VALUE!
																									#VALUE!	#VALUE!									#VALUE!
																									#VALUE!	#VALUE!									#VALUE!
																									#VALUE!	#VALUE!									#VALUE!
																									#VALUE!	#VALUE!									#VALUE!
																									#VALUE!	#VALUE!									#VALUE!
																									#VALUE!	#VALUE!									#VALUE!
																									#VALUE!	#VALUE!									#VALUE!
																									#VALUE!	#VALUE!									#VALUE!
																									#VALUE!	#VALUE!									#VALUE!
																									#VALUE!	#VALUE!									#VALUE!
																									#VALUE!	#VALUE!									#VALUE!
																									#VALUE!	#VALUE!									#VALUE!
																									#VALUE!	#VALUE!									#VALUE!
																									#VALUE!	#VALUE!									#VALUE!
																									#VALUE!	#VALUE!									#VALUE!
																									#VALUE!	#VALUE!									#VALUE!
																									#VALUE!	#VALUE!									#VALUE!
																									#VALUE!	#VALUE!									#VALUE!
																									#VALUE!	#VALUE!									#VALUE!
																									#VALUE!	#VALUE!									#VALUE!
																									#VALUE!	#VALUE!									#VALUE!
																									#VALUE!	#VALUE!									#VALUE!
																									#VALUE!	#VALUE!									#VALUE!
																									#VALUE!	#VALUE!									#VALUE!
																									#VALUE!	#VALUE!									#VALUE!
																									#VALUE!	#VALUE!									#VALUE!
																									#VALUE!	#VALUE!									#VALUE!
																									#VALUE!	#VALUE!									#VALUE!
																									#VALUE!	#VALUE!									#VALUE!
																									#VALUE!	#VALUE!									#VALUE!
																									#VALUE!	#VALUE!									#VALUE!
																									#VALUE!	#VALUE!									#VALUE!
																									#VALUE!	#VALUE!									#VALUE!
																									#VALUE!	#VALUE!									#VALUE!
																									#VALUE!	#VALUE!									#VALUE!
																									#VALUE!	#VALUE!									#VALUE!
																									#VALUE!	#VALUE!									#VALUE!
																									#VALUE!	#VALUE!									#VALUE!
																									#VALUE!	#VALUE!									#VALUE!
																									#VALUE!	#VALUE!									#VALUE!
																									#VALUE!	#VALUE!									#VALUE!
																									#VALUE!	#VALUE!									#VALUE!
																									#VALUE!	#VALUE!									#VALUE!
																									#VALUE!	#VALUE!									#VALUE!
																									#VALUE!	#VALUE!									#VALUE!
																									#VALUE!	#VALUE!									#VALUE!
																									#VALUE!	#VALUE!									#VALUE!
																									#VALUE!	#VALUE!									#VALUE!
																									#VALUE!	#VALUE!									#VALUE!
																									#VALUE!	#VALUE!									#VALUE!
																									#VALUE!	#VALUE!									#VALUE!
																									#VALUE!	#VALUE!									#VALUE!
																									#VALUE!	#VALUE!									#VALUE!
																									#VALUE!	#VALUE!									#VALUE!
																									#VALUE!	#VALUE!									#VALUE!
																									#VALUE!	#VALUE!									#VALUE!
																									#VALUE!	#VALUE!									#VALUE!
																									#VALUE!	#VALUE!									#VALUE!
																									#VALUE!	#VALUE!									#VALUE!
																									#VALUE!	#VALUE!									#VALUE!
																									#VALUE!	#VALUE!									#VALUE!
																									#VALUE!	#VALUE!									#VALUE!
																									#VALUE!	#VALUE!									#VALUE!
																									#VALUE!	#VALUE!									#VALUE!
																									#VALUE!	#VALUE!									#VALUE!
																									#VALUE!	#VALUE!									#VALUE!
																									#VALUE!	#VALUE!									#VALUE!
																									#VALUE!	#VALUE!									#VALUE!
																									#VALUE!	#VALUE!									#VALUE!
																									#VALUE!	#VALUE!									#VALUE!
																									#VALUE!	#VALUE!									#VALUE!
																									#VALUE!	#VALUE!									#VALUE!
																									#VALUE!	#VALUE!									#VALUE!
																									#VALUE!	#VALUE!									#VALUE!
																									#VALUE!	#VALUE!									#VALUE!
																									#VALUE!	#VALUE!									#VALUE!
																									#VALUE!	#VALUE!									#VALUE!
																									#VALUE!	#VALUE!									#VALUE!
																									#VALUE!	#VALUE!									#VALUE!
																									#VALUE!	#VALUE!									#VALUE!
																									#VALUE!	#VALUE!									#VALUE!
																									#VALUE!	#VALUE!									#VALUE!
																									#VALUE!	#VALUE!									#VALUE!
																									#VALUE!	#VALUE!									#VALUE!
																									#VALUE!	#VALUE!									#VALUE!
																									#VALUE!	#VALUE!									#VALUE!
																									#VALUE!	#VALUE!									#VALUE!
																									#VALUE!	#VALUE!									#VALUE!
																									#VALUE!	#VALUE!									#VALUE!
																									#VALUE!	#VALUE!									#VALUE!
																									#VALUE!	#VALUE!									#VALUE!
																									#VALUE!	#VALUE!									#VALUE!
																									#VALUE!	#VALUE!									#VALUE!
																									#VALUE!	#VALUE!									#VALUE!
																									#VALUE!	#VALUE!									#VALUE!
																									#VALUE!	#VALUE!									#VALUE!
																									#VALUE!	#VALUE!									#VALUE!
																									#VALUE!	#VALUE!									#VALUE!
																									#VALUE!	#VALUE!									#VALUE!
																									#VALUE!	#VALUE!									#VALUE!
																									#VALUE!	#VALUE!									#VALUE!
																									#VALUE!	#VALUE!									#VALUE!
																									#VALUE!	#VALUE!									#VALUE!
																									#VALUE!	#VALUE!									#VALUE!
																									#VALUE!	#VALUE!									#VALUE!
																									#VALUE!	#VALUE!									#VALUE!
																									#VALUE!	#VALUE!									#VALUE!
																									#VALUE!	#VALUE!									#VALUE!
																									#VALUE!	#VALUE!									#VALUE!
																									#VALUE!	#VALUE!									#VALUE!
																									#VALUE!	#VALUE!									#VALUE!
																									#VALUE!	#VALUE!									#VALUE!
																									#VALUE!	#VALUE!									#VALUE!
																									#VALUE!	#VALUE!									#VALUE!
																									#VALUE!	#VALUE!									#VALUE!
																									#VALUE!	#VALUE!									#VALUE!
																									#VALUE!	#VALUE!									#VALUE!
																									#VALUE!	#VALUE!									#VALUE!
																									#VALUE!	#VALUE!									#VALUE!
																									#VALUE!	#VALUE!									#VALUE!
																									#VALUE!	#VALUE!									#VALUE!
																									#VALUE!	#VALUE!									#VALUE!
																									#VALUE!	#VALUE!									#VALUE!
																									#VALUE!	#VALUE!									#VALUE!
																									#VALUE!	#VALUE!									#VALUE!
																									#VALUE!	#VALUE!									#VALUE!
																									#VALUE!	#VALUE!									#VALUE!
																									#VALUE!	#VALUE!									#VALUE!
																									#VALUE!	#VALUE!									#VALUE!
																									#VALUE!	#VALUE!									#VALUE!
																									#VALUE!	#VALUE!									#VALUE!
																									#VALUE!	#VALUE!									#VALUE!
																									#VALUE!	#VALUE!									#VALUE!
																									#VALUE!	#VALUE!									#VALUE!
																									#VALUE!	#VALUE!									#VALUE!
																									#VALUE!	#VALUE!									#VALUE!
																									#VALUE!	#VALUE!									#VALUE!
																									#VALUE!	#VALUE!									#VALUE!
																									#VALUE!	#VALUE!									#VALUE!
																									#VALUE!	#VALUE!									#VALUE!
																									#VALUE!	#VALUE!									#VALUE!
																									#VALUE!	#VALUE!									#VALUE!
																									#VALUE!	#VALUE!									#VALUE!
																									#VALUE!	#VALUE!									#VALUE!
																									#VALUE!	#VALUE!									#VALUE!
																									#VALUE!	#VALUE!									#VALUE!
																									#VALUE!	#VALUE!									#VALUE!
																									#VALUE!	#VALUE!									#VALUE!
																									#VALUE!	#VALUE!									#VALUE!
																									#VALUE!	#VALUE!									#VALUE!
																									#VALUE!	#VALUE!									#VALUE!
																									#VALUE!	#VALUE!									#VALUE!
																									#VALUE!	#VALUE!									#VALUE!
																									#VALUE!	#VALUE!									#VALUE!
																									#VALUE!	#VALUE!									#VALUE!
																									#VALUE!	#VALUE!									#VALUE!
																									#VALUE!	#VALUE!									#VALUE!
																									#VALUE!	#VALUE!									#VALUE!
																									#VALUE!	#VALUE!									#VALUE!
																									#VALUE!	#VALUE!									#VALUE!
																									#VALUE!	#VALUE!									#VALUE!
																									#VALUE!	#VALUE!									#VALUE!
																									#VALUE!	#VALUE!									#VALUE!
																									#VALUE!	#VALUE!									#VALUE!
																									#VALUE!	#VALUE!									#VALUE!
																									#VALUE!	#VALUE!									#VALUE!
																									#VALUE!	#VALUE!									#VALUE!
																									#VALUE!	#VALUE!									#VALUE!
																									#VALUE!	#VALUE!									#VALUE!
																									#VALUE!	#VALUE!									#VALUE!
																									#VALUE!	#VALUE!									#VALUE!
																									#VALUE!	#VALUE!									#VALUE!
																									#VALUE!	#VALUE!									#VALUE!
																									#VALUE!	#VALUE!									#VALUE!
																									#VALUE!	#VALUE!									#VALUE!
																									#VALUE!	#VALUE!									#VALUE!
																									#VALUE!	#VALUE!									#VALUE!
																									#VALUE!	#VALUE!									#VALUE!
																									#VALUE!	#VALUE!									#VALUE!
																									#VALUE!	#VALUE!									#VALUE!
																									#VALUE!	#VALUE!									#VALUE!
																									#VALUE!	#VALUE!									#VALUE!
																									#VALUE!	#VALUE!									#VALUE!
																									#VALUE!	#VALUE!									#VALUE!
																									#VALUE!	#VALUE!									#VALUE!
																									#VALUE!	#VALUE!									#VALUE!
																									#VALUE!	#VALUE!									#VALUE!
																									#VALUE!	#VALUE!									#VALUE!
																									#VALUE!	#VALUE!									#VALUE!
																									#VALUE!	#VALUE!									#VALUE!
																									#VALUE!	#VALUE!									#VALUE!
																									#VALUE!	#VALUE!									#VALUE!
																									#VALUE!	#VALUE!									#VALUE!
																									#VALUE!	#VALUE!									#VALUE!
																									#VALUE!	#VALUE!									#VALUE!
																									#VALUE!	#VALUE!									#VALUE!
																									#VALUE!	#VALUE!									#VALUE!
																									#VALUE!	#VALUE!									#VALUE!
																									#VALUE!	#VALUE!									#VALUE!
																									#VALUE!	#VALUE!									#VALUE!
																									#VALUE!	#VALUE!									#VALUE!
																									#VALUE!	#VALUE!									#VALUE!
																									#VALUE!	#VALUE!									#VALUE!
																									#VALUE!	#VALUE!									#VALUE!
																									#VALUE!	#VALUE!									#VALUE!
																									#VALUE!	#VALUE!									#VALUE!
																									#VALUE!	#VALUE!									#VALUE!
																									#VALUE!	#VALUE!									#VALUE!
																									#VALUE!	#VALUE!									#VALUE!
																									#VALUE!	#VALUE!									#VALUE!
																									#VALUE!	#VALUE!									#VALUE!
																									#VALUE!	#VALUE!									#VALUE!
																									#VALUE!	#VALUE!									#VALUE!
																									#VALUE!	#VALUE!									#VALUE!
																									#VALUE!	#VALUE!									#VALUE!
																									#VALUE!	#VALUE!									#VALUE!
																									#VALUE!	#VALUE!									#VALUE!
																									#VALUE!	#VALUE!									#VALUE!
																									#VALUE!	#VALUE!									#VALUE!
																									#VALUE!	#VALUE!									#VALUE!
																									#VALUE!	#VALUE!									#VALUE!
																									#VALUE!	#VALUE!									#VALUE!
																									#VALUE!	#VALUE!									#VALUE!
																									#VALUE!	#VALUE!									#VALUE!
																									#VALUE!	#VALUE!									#VALUE!
																									#VALUE!	#VALUE!									#VALUE!
																									#VALUE!	#VALUE!									#VALUE!

## Sheet: Calc
The solving for parameters in the functions BE, G4 and SU is analogue to the procedure for G3, named previously GG (generalized Gamma),													N
described in Auf der Maur, A. N., 2001: Statistical tools for drop size distributions: Moments and generalized gamma, J. Atmos. Sci. 58, 407-418													2.53E+02
Here below the calculations are tried for all functions, starting for BE at line 11, G4 line 51, SU line 91, LN line 131.
BE	β32	β4	|β3|			Range β4	1.15E+00	3.23E+00
	1.53E-01	2.99E+00	3.91E-01	BE: P=	BETAI(Y; r; u)
Solving for parameters of BE						fault β3+β4	2.61E-09
1.00E-008	=precision		1	=sign of β3	step	0.1		0.2		0.4		0.6		0.6		0.7		0.7		0.8		0.8		0.9		0.9		0.99		0.999		1		1		1
	r	u	|β3|	u	|β3|	u	|β3|	u	|β3|	u	|β3|	u	|β3|	u	v	u	|β3|	u	|β3|	u	|β3|	u	|β3|	u	|β3|	u	|β3|	u	|β3|	u	|β3|	u	|β3|	u	|β3|	u	µ'1	µ'2	µ'3	µ'4	µ'5	µ'6	delta |β3|	β4	dr/dβ4		If Binomial
	start r	start u		1.01*u1																																	1	2	3	4	5	6					p1	(β4-1)1/2
	8.32E+00	8.30E+00	-1.10E-03	8.39E+00	3.38E-03	9.10E+00	3.96E-02	1.05E+01	9.93E-02	1.32E+01	1.88E-01	1.69E+01	2.73E-01	2.00E+01	3.24E-01	2.29E+01	3.61E-01	2.45E+01	3.78E-01	2.54E+01	3.87E-01	2.56E+01	3.90E-01	2.57E+01	3.90E-01	2.57E+01	3.91E-01	2.57E+01	3.91E-01	2.57E+01	3.91E-01	2.57E+01	3.91E-01	2.57E+01	3.91E-01	2.57E+01	2.44E-01	6.50E-02	1.86E-02	5.69E-03			-1.30E-14	3.06E+00	1.00E+00		3.99E-03	1.57E+01
step	8.41E+00	8.39E+00	-1.10E-03	8.47E+00	3.36E-03	9.20E+00	3.96E-02	1.06E+01	9.93E-02	1.34E+01	1.88E-01	1.72E+01	2.72E-01	2.03E+01	3.24E-01	2.32E+01	3.60E-01	2.49E+01	3.78E-01	2.58E+01	3.87E-01	2.61E+01	3.90E-01	2.62E+01	3.90E-01	2.62E+01	3.91E-01	2.62E+01	3.91E-01	2.62E+01	3.91E-01	2.62E+01	3.91E-01	2.62E+01	3.91E-01	2.62E+01	2.43E-01	6.43E-02	1.83E-02	5.55E-03			3.55E-14	3.06E+00	3.51E+01		3.99E-03	1.57E+01
0.1	8.16E+00	9.94E+00	8.61E-02	1.00E+01	9.02E-02	1.08E+01	1.19E-01	1.21E+01	1.66E-01	1.48E+01	2.37E-01	1.82E+01	3.04E-01	2.09E+01	3.44E-01	2.30E+01	3.71E-01	2.41E+01	3.83E-01	2.47E+01	3.89E-01	2.48E+01	3.90E-01	2.49E+01	3.91E-01	2.49E+01	3.91E-01	2.49E+01	3.91E-01	2.49E+01	3.91E-01	2.49E+01	3.91E-01	2.49E+01	3.91E-01	2.49E+01	2.47E-01	6.65E-02	1.93E-02	5.98E-03			1.72E-14	3.06E+00	3.45E+01		3.99E-03	1.57E+01
0.2	7.72E+00	1.11E+01	1.57E-01	1.12E+01	1.61E-01	1.19E+01	1.83E-01	1.31E+01	2.20E-01	1.54E+01	2.76E-01	1.83E+01	3.29E-01	2.02E+01	3.59E-01	2.16E+01	3.78E-01	2.23E+01	3.86E-01	2.26E+01	3.90E-01	2.26E+01	3.90E-01	2.27E+01	3.91E-01	2.27E+01	3.91E-01	2.27E+01	3.91E-01	2.27E+01	3.91E-01	2.27E+01	3.91E-01	2.27E+01	3.91E-01	2.27E+01	2.54E-01	7.07E-02	2.12E-02	6.82E-03			-2.20E-14	3.04E+00	3.19E+01		3.99E-03	1.57E+01
0.4	7.09E+00	1.33E+01	2.64E-01	1.34E+01	2.68E-01	1.39E+01	2.80E-01	1.48E+01	3.00E-01	1.63E+01	3.32E-01	1.79E+01	3.62E-01	1.88E+01	3.77E-01	1.94E+01	3.86E-01	1.96E+01	3.89E-01	1.97E+01	3.90E-01	1.97E+01	3.91E-01	1.97E+01	3.91E-01	1.97E+01	3.91E-01	1.97E+01	3.91E-01	1.97E+01	3.91E-01	1.97E+01	3.91E-01	1.97E+01	3.91E-01	1.97E+01	2.65E-01	7.71E-02	2.43E-02	8.25E-03			-6.29E-12	3.02E+00	2.81E+01		3.99E-03	1.57E+01
0.6	6.64E+00	1.45E+01	3.25E-01	1.46E+01	3.29E-01	1.49E+01	3.35E-01	1.54E+01	3.45E-01	1.62E+01	3.62E-01	1.70E+01	3.78E-01	1.74E+01	3.85E-01	1.76E+01	3.89E-01	1.77E+01	3.90E-01	1.77E+01	3.90E-01	1.77E+01	3.91E-01	1.77E+01	3.91E-01	1.77E+01	3.91E-01	1.77E+01	3.91E-01	1.77E+01	3.91E-01	1.77E+01	3.91E-01	1.77E+01	3.91E-01	1.77E+01	2.72E-01	8.20E-02	2.69E-02	9.47E-03			-2.20E-12	3.00E+00	2.45E+01		3.99E-03	1.57E+01
0.6	6.51E+00	1.32E+01	3.03E-01	1.34E+01	3.07E-01	1.37E+01	3.15E-01	1.43E+01	3.29E-01	1.52E+01	3.52E-01	1.63E+01	3.73E-01	1.68E+01	3.83E-01	1.71E+01	3.88E-01	1.72E+01	3.90E-01	1.72E+01	3.90E-01	1.72E+01	3.91E-01	1.72E+01	3.91E-01	1.72E+01	3.91E-01	1.72E+01	3.91E-01	1.72E+01	3.91E-01	1.72E+01	3.91E-01	1.72E+01	3.91E-01	1.72E+01	2.75E-01	8.35E-02	2.76E-02	9.84E-03			-3.34E-12	3.00E+00	2.27E+01		3.99E-03	1.57E+01
0.6	6.47E+00	1.29E+01	2.97E-01	1.30E+01	3.01E-01	1.34E+01	3.10E-01	1.40E+01	3.25E-01	1.50E+01	3.49E-01	1.60E+01	3.71E-01	1.66E+01	3.82E-01	1.69E+01	3.88E-01	1.70E+01	3.90E-01	1.70E+01	3.90E-01	1.70E+01	3.91E-01	1.70E+01	3.91E-01	1.70E+01	3.91E-01	1.70E+01	3.91E-01	1.70E+01	3.91E-01	1.70E+01	3.91E-01	1.70E+01	3.91E-01	1.70E+01	2.75E-01	8.39E-02	2.79E-02	9.96E-03			-3.68E-12	2.99E+00	2.22E+01		3.99E-03	1.57E+01
0.7	6.45E+00	1.39E+01	3.24E-01	1.40E+01	3.27E-01	1.42E+01	3.34E-01	1.47E+01	3.45E-01	1.55E+01	3.62E-01	1.63E+01	3.78E-01	1.67E+01	3.85E-01	1.69E+01	3.89E-01	1.69E+01	3.90E-01	1.70E+01	3.90E-01	1.70E+01	3.91E-01	1.70E+01	3.91E-01	1.70E+01	3.91E-01	1.70E+01	3.91E-01	1.70E+01	3.91E-01	1.70E+01	3.91E-01	1.70E+01	3.91E-01	1.70E+01	2.76E-01	8.41E-02	2.80E-02	1.00E-02			-2.23E-12	2.99E+00	2.21E+01		3.99E-03	1.57E+01
0.7	6.45E+00	1.38E+01	3.23E-01	1.39E+01	3.27E-01	1.42E+01	3.33E-01	1.47E+01	3.44E-01	1.55E+01	3.61E-01	1.63E+01	3.78E-01	1.66E+01	3.85E-01	1.68E+01	3.89E-01	1.69E+01	3.90E-01	1.69E+01	3.90E-01	1.69E+01	3.91E-01	1.69E+01	3.91E-01	1.69E+01	3.91E-01	1.69E+01	3.91E-01	1.69E+01	3.91E-01	1.69E+01	3.91E-01	1.69E+01	3.91E-01	1.69E+01	2.76E-01	8.42E-02	2.80E-02	1.00E-02			-2.30E-12	2.99E+00	2.20E+01		3.99E-03	1.57E+01
0.7	6.45E+00	1.38E+01	3.23E-01	1.39E+01	3.26E-01	1.42E+01	3.33E-01	1.47E+01	3.44E-01	1.54E+01	3.61E-01	1.62E+01	3.77E-01	1.66E+01	3.85E-01	1.68E+01	3.89E-01	1.69E+01	3.90E-01	1.69E+01	3.90E-01	1.69E+01	3.91E-01	1.69E+01	3.91E-01	1.69E+01	3.91E-01	1.69E+01	3.91E-01	1.69E+01	3.91E-01	1.69E+01	3.91E-01	1.69E+01	3.91E-01	1.69E+01	2.76E-01	8.42E-02	2.80E-02	1.00E-02			-2.34E-12	2.99E+00	2.20E+01		3.99E-03	1.57E+01
0.8	6.45E+00	1.48E+01	3.48E-01	1.50E+01	3.51E-01	1.52E+01	3.55E-01	1.55E+01	3.62E-01	1.60E+01	3.73E-01	1.65E+01	3.83E-01	1.68E+01	3.87E-01	1.69E+01	3.90E-01	1.69E+01	3.90E-01	1.69E+01	3.91E-01	1.69E+01	3.91E-01	1.69E+01	3.91E-01	1.69E+01	3.91E-01	1.69E+01	3.91E-01	1.69E+01	3.91E-01	1.69E+01	3.91E-01	1.69E+01	3.91E-01	1.69E+01	2.76E-01	8.42E-02	2.80E-02	1.00E-02			-1.25E-12	2.99E+00	2.20E+01		3.99E-03	1.57E+01
0.8	6.45E+00	1.48E+01	3.48E-01	1.50E+01	3.51E-01	1.52E+01	3.55E-01	1.55E+01	3.62E-01	1.60E+01	3.73E-01	1.65E+01	3.83E-01	1.68E+01	3.87E-01	1.69E+01	3.90E-01	1.69E+01	3.90E-01	1.69E+01	3.91E-01	1.69E+01	3.91E-01	1.69E+01	3.91E-01	1.69E+01	3.91E-01	1.69E+01	3.91E-01	1.69E+01	3.91E-01	1.69E+01	3.91E-01	1.69E+01	3.91E-01	1.69E+01	2.76E-01	8.42E-02	2.80E-02	1.00E-02			-1.24E-12	2.99E+00	2.20E+01		3.99E-03	1.57E+01
0.8	6.45E+00	1.48E+01	3.48E-01	1.50E+01	3.51E-01	1.52E+01	3.55E-01	1.55E+01	3.62E-01	1.60E+01	3.73E-01	1.65E+01	3.83E-01	1.68E+01	3.87E-01	1.69E+01	3.90E-01	1.69E+01	3.90E-01	1.69E+01	3.91E-01	1.69E+01	3.91E-01	1.69E+01	3.91E-01	1.69E+01	3.91E-01	1.69E+01	3.91E-01	1.69E+01	3.91E-01	1.69E+01	3.91E-01	1.69E+01	3.91E-01	1.69E+01	2.76E-01	8.42E-02	2.80E-02	1.00E-02			-1.24E-12	2.99E+00	2.20E+01		3.99E-03	1.57E+01
0.9	6.45E+00	1.59E+01	3.70E-01	1.60E+01	3.74E-01	1.61E+01	3.75E-01	1.63E+01	3.78E-01	1.65E+01	3.83E-01	1.68E+01	3.87E-01	1.69E+01	3.89E-01	1.69E+01	3.90E-01	1.69E+01	3.90E-01	1.69E+01	3.91E-01	1.69E+01	3.91E-01	1.69E+01	3.91E-01	1.69E+01	3.91E-01	1.69E+01	3.91E-01	1.69E+01	3.91E-01	1.69E+01	3.91E-01	1.69E+01	3.91E-01	1.69E+01	2.76E-01	8.42E-02	2.80E-02	1.00E-02			-4.71E-13	2.99E+00	2.20E+01		3.99E-03	1.57E+01
0.9	6.45E+00	1.59E+01	3.70E-01	1.60E+01	3.74E-01	1.61E+01	3.75E-01	1.63E+01	3.78E-01	1.65E+01	3.83E-01	1.68E+01	3.87E-01	1.69E+01	3.89E-01	1.69E+01	3.90E-01	1.69E+01	3.90E-01	1.69E+01	3.91E-01	1.69E+01	3.91E-01	1.69E+01	3.91E-01	1.69E+01	3.91E-01	1.69E+01	3.91E-01	1.69E+01	3.91E-01	1.69E+01	3.91E-01	1.69E+01	3.91E-01	1.69E+01	2.76E-01	8.42E-02	2.80E-02	1.00E-02			-4.41E-13	2.99E+00	2.20E+01		3.99E-03	1.57E+01
0.9	6.45E+00	1.59E+01	3.70E-01	1.60E+01	3.74E-01	1.61E+01	3.75E-01	1.63E+01	3.78E-01	1.65E+01	3.83E-01	1.68E+01	3.87E-01	1.69E+01	3.89E-01	1.69E+01	3.90E-01	1.69E+01	3.90E-01	1.69E+01	3.91E-01	1.69E+01	3.91E-01	1.69E+01	3.91E-01	1.69E+01	3.91E-01	1.69E+01	3.91E-01	1.69E+01	3.91E-01	1.69E+01	3.91E-01	1.69E+01	3.91E-01	1.69E+01	2.76E-01	8.42E-02	2.80E-02	1.00E-02			-4.76E-13	2.99E+00	2.20E+01		3.99E-03	1.57E+01
0.99	6.45E+00	1.68E+01	3.89E-01	1.70E+01	3.92E-01	1.70E+01	3.92E-01	1.70E+01	3.91E-01	1.70E+01	3.91E-01	1.69E+01	3.91E-01	1.69E+01	3.91E-01	1.69E+01	3.91E-01	1.69E+01	3.91E-01	1.69E+01	3.91E-01	1.69E+01	3.91E-01	1.69E+01	3.91E-01	1.69E+01	3.91E-01	1.69E+01	3.91E-01	1.69E+01	3.91E-01	1.69E+01	3.91E-01	1.69E+01	3.91E-01	1.69E+01	2.76E-01	8.42E-02	2.80E-02	1.00E-02			2.86E-11	2.99E+00	2.20E+01		3.99E-03	1.57E+01
0.999	6.45E+00	1.69E+01	3.90E-01	1.71E+01	3.93E-01	1.71E+01	3.93E-01	1.70E+01	3.93E-01	1.70E+01	3.92E-01	1.70E+01	3.91E-01	1.69E+01	3.91E-01	1.69E+01	3.91E-01	1.69E+01	3.91E-01	1.69E+01	3.91E-01	1.69E+01	3.91E-01	1.69E+01	3.91E-01	1.69E+01	3.91E-01	1.69E+01	3.91E-01	1.69E+01	3.91E-01	1.69E+01	3.91E-01	1.69E+01	3.91E-01	1.69E+01	2.76E-01	8.42E-02	2.80E-02	1.00E-02			7.07E-11	2.99E+00	2.20E+01		3.99E-03	1.57E+01
1	6.45E+00	1.69E+01	3.91E-01	1.71E+01	3.94E-01	1.71E+01	3.93E-01	1.71E+01	3.93E-01	1.70E+01	3.92E-01	1.70E+01	3.91E-01	1.69E+01	3.91E-01	1.69E+01	3.91E-01	1.69E+01	3.91E-01	1.69E+01	3.91E-01	1.69E+01	3.91E-01	1.69E+01	3.91E-01	1.69E+01	3.91E-01	1.69E+01	3.91E-01	1.69E+01	3.91E-01	1.69E+01	3.91E-01	1.69E+01	3.91E-01	1.69E+01	2.76E-01	8.42E-02	2.80E-02	1.00E-02			7.53E-11	2.99E+00	2.20E+01		3.99E-03	1.57E+01
1	6.45E+00	1.69E+01	3.91E-01	1.71E+01	3.94E-01	1.71E+01	3.93E-01	1.71E+01	3.93E-01	1.70E+01	3.92E-01	1.70E+01	3.91E-01	1.69E+01	3.91E-01	1.69E+01	3.91E-01	1.69E+01	3.91E-01	1.69E+01	3.91E-01	1.69E+01	3.91E-01	1.69E+01	3.91E-01	1.69E+01	3.91E-01	1.69E+01	3.91E-01	1.69E+01	3.91E-01	1.69E+01	3.91E-01	1.69E+01	3.91E-01	1.69E+01	2.76E-01	8.42E-02	2.80E-02	1.00E-02			7.52E-11	2.99E+00	2.20E+01		3.99E-03	1.57E+01
1	6.45E+00	1.69E+01	3.91E-01	1.71E+01	3.94E-01	1.71E+01	3.93E-01	1.71E+01	3.93E-01	1.70E+01	3.92E-01	1.70E+01	3.91E-01	1.69E+01	3.91E-01	1.69E+01	3.91E-01	1.69E+01	3.91E-01	1.69E+01	3.91E-01	1.69E+01	3.91E-01	1.69E+01	3.91E-01	1.69E+01	3.91E-01	1.69E+01	3.91E-01	1.69E+01	3.91E-01	1.69E+01	3.91E-01	1.69E+01	3.91E-01	1.69E+01	2.76E-01	8.42E-02	2.80E-02	1.00E-02			7.52E-11	2.99E+00	2.20E+01		3.99E-03	1.57E+01
1	6.45E+00	1.69E+01	3.91E-01	1.71E+01	3.94E-01	1.71E+01	3.93E-01	1.71E+01	3.93E-01	1.70E+01	3.92E-01	1.70E+01	3.91E-01	1.69E+01	3.91E-01	1.69E+01	3.91E-01	1.69E+01	3.91E-01	1.69E+01	3.91E-01	1.69E+01	3.91E-01	1.69E+01	3.91E-01	1.69E+01	3.91E-01	1.69E+01	3.91E-01	1.69E+01	3.91E-01	1.69E+01	3.91E-01	1.69E+01	3.91E-01	1.69E+01	2.76E-01	8.42E-02	2.80E-02	1.00E-02			7.52E-11	2.99E+00	2.20E+01		3.99E-03	1.57E+01
1	6.45E+00	1.69E+01	3.91E-01	1.71E+01	3.94E-01	1.71E+01	3.93E-01	1.71E+01	3.93E-01	1.70E+01	3.92E-01	1.70E+01	3.91E-01	1.69E+01	3.91E-01	1.69E+01	3.91E-01	1.69E+01	3.91E-01	1.69E+01	3.91E-01	1.69E+01	3.91E-01	1.69E+01	3.91E-01	1.69E+01	3.91E-01	1.69E+01	3.91E-01	1.69E+01	3.91E-01	1.69E+01	3.91E-01	1.69E+01	3.91E-01	1.69E+01	2.76E-01	8.42E-02	2.80E-02	1.00E-02	3.83E-03	1.54E-03	7.53E-11	2.99E+00			3.99E-03	1.57E+01
	r																																			u	µ'1	µ'2	µ'3	µ'4	µ'5	β3	β4	β5	β6		p
	6.45E+00																																			1.69E+01	2.76E-01	8.42E-02	2.80E-02	1.00E-02	3.83E-03	3.91E-01	2.99E+00	3.56E+00	1.60E+01		3.99E-03
																																										d=	c=	solutions?	Min:
																																					r/(r+u)					1.92E-01	6.96E-01	2.76E-01	1.00E+00
																																												6.45E-18
G4	β32	β4	|β3|			range β4	1.92E+00	3.27E+00	help	2.02E+00
	1.53E-01	2.99E+00	3.91E-01	G4: P=	GAMMAI(Yr; u)
Solving for parameters of G4				fault β3+β4	1.95E-09
				(1.01*u1)	step							0.2					0.4					0.6					0.6					0.7					0.8					0.9					0.9
	r	u	µ'1 µ2-1/2	µ'2 µ2-1	µ'3 µ2-3/2	|β3|	u	µ'1 µ2-1/2	µ'2 µ2-1	µ'3 µ2-3/2	|β3|	u	µ'1 µ2-1/2	µ'2 µ2-1	µ'3 µ2-3/2	|β3|	u	µ'1 µ2-1/2	µ'2 µ2-1	µ'3 µ2-3/2	|β3|	u	µ'1 µ2-1/2	µ'2 µ2-1	µ'3 µ2-3/2	|β3|	u	µ'1 µ2-1/2	µ'2 µ2-1	µ'3 µ2-3/2	|β3|	u	µ'1 µ2-1/2	µ'2 µ2-1	µ'3 µ2-3/2	|β3|	u	µ'1 µ2-1/2	µ'2 µ2-1	µ'3 µ2-3/2	|β3|	u	µ'1 µ2-1/2	µ'2 µ2-1	µ'3 µ2-3/2	|β3|	u	µ'1 µ2-1/2	µ'2 µ2-1
	start r	start u	1.00E+00	2.00E+00	3.00E+00			1.00E+00	2.00E+00	3.00E+00			1.00E+00	2.00E+00	3.00E+00			1.00E+00	2.00E+00	3.00E+00			1.00E+00	2.00E+00	3.00E+00			1.00E+00	2.00E+00	3.00E+00			1.00E+00	2.00E+00	3.00E+00			1.00E+00	2.00E+00	3.00E+00			1.00E+00	2.00E+00	3.00E+00			1.00E+00	2.00E+00
	3.00E+00	3.14E-01	1.42E+00	3.03E+00	7.84E+00	6.70E-01	3.18E-01	1.43E+00	3.05E+00	7.90E+00	6.64E-01	3.44E-01	1.50E+00	3.25E+00	8.48E+00	6.13E-01	3.91E-01	1.61E+00	3.60E+00	9.56E+00	5.38E-01	4.46E-01	1.74E+00	4.02E+00	1.09E+01	4.67E-01	4.81E-01	1.81E+00	4.29E+00	1.18E+01	4.29E-01	5.06E-01	1.87E+00	4.49E+00	1.25E+01	4.05E-01	5.17E-01	1.89E+00	4.58E+00	1.28E+01	3.94E-01	5.21E-01	1.90E+00	4.61E+00	1.29E+01	3.91E-01	5.21E-01	1.90E+00	4.61E+00
step	3.03E+00	3.11E-01	1.43E+00	3.04E+00	7.86E+00	6.63E-01	3.14E-01	1.44E+00	3.06E+00	7.92E+00	6.56E-01	3.40E-01	1.50E+00	3.25E+00	8.49E+00	6.07E-01	3.85E-01	1.61E+00	3.59E+00	9.54E+00	5.34E-01	4.37E-01	1.73E+00	4.00E+00	1.09E+01	4.64E-01	4.70E-01	1.81E+00	4.26E+00	1.17E+01	4.27E-01	4.93E-01	1.86E+00	4.45E+00	1.24E+01	4.04E-01	5.04E-01	1.88E+00	4.53E+00	1.27E+01	3.94E-01	5.07E-01	1.89E+00	4.56E+00	1.28E+01	3.91E-01	5.08E-01	1.89E+00	4.56E+00
0.1	2.93E+00	3.40E-01	1.46E+00	3.14E+00	8.18E+00	6.52E-01	3.44E-01	1.47E+00	3.17E+00	8.25E+00	6.46E-01	3.72E-01	1.54E+00	3.37E+00	8.85E+00	5.98E-01	4.20E-01	1.65E+00	3.72E+00	9.96E+00	5.28E-01	4.78E-01	1.77E+00	4.14E+00	1.14E+01	4.61E-01	5.14E-01	1.85E+00	4.42E+00	1.23E+01	4.26E-01	5.39E-01	1.90E+00	4.61E+00	1.30E+01	4.04E-01	5.51E-01	1.92E+00	4.70E+00	1.33E+01	3.94E-01	5.55E-01	1.93E+00	4.73E+00	1.34E+01	3.91E-01	5.55E-01	1.93E+00	4.73E+00
0.2	2.76E+00	4.01E-01	1.53E+00	3.33E+00	8.79E+00	6.38E-01	4.05E-01	1.54E+00	3.36E+00	8.87E+00	6.33E-01	4.38E-01	1.61E+00	3.58E+00	9.55E+00	5.88E-01	4.96E-01	1.72E+00	3.97E+00	1.08E+01	5.21E-01	5.65E-01	1.85E+00	4.44E+00	1.24E+01	4.59E-01	6.10E-01	1.94E+00	4.75E+00	1.35E+01	4.25E-01	6.42E-01	1.99E+00	4.96E+00	1.43E+01	4.03E-01	6.57E-01	2.02E+00	5.07E+00	1.47E+01	3.94E-01	6.62E-01	2.03E+00	5.10E+00	1.48E+01	3.91E-01	6.62E-01	2.03E+00	5.11E+00
0.4	2.50E+00	5.30E-01	1.65E+00	3.71E+00	1.00E+01	6.19E-01	5.35E-01	1.66E+00	3.74E+00	1.01E+01	6.14E-01	5.81E-01	1.73E+00	4.01E+00	1.10E+01	5.73E-01	6.62E-01	1.86E+00	4.47E+00	1.26E+01	5.12E-01	7.60E-01	2.01E+00	5.04E+00	1.46E+01	4.55E-01	8.26E-01	2.10E+00	5.43E+00	1.61E+01	4.23E-01	8.74E-01	2.17E+00	5.71E+00	1.71E+01	4.03E-01	8.97E-01	2.20E+00	5.85E+00	1.77E+01	3.94E-01	9.05E-01	2.21E+00	5.90E+00	1.79E+01	3.91E-01	9.06E-01	2.21E+00	5.90E+00
0.6	2.30E+00	7.74E-01	1.89E+00	4.56E+00	1.29E+01	5.54E-01	7.82E-01	1.90E+00	4.60E+00	1.31E+01	5.50E-01	8.41E-01	1.97E+00	4.89E+00	1.41E+01	5.21E-01	9.43E-01	2.10E+00	5.41E+00	1.60E+01	4.77E-01	1.06E+00	2.24E+00	6.02E+00	1.84E+01	4.35E-01	1.14E+00	2.33E+00	6.41E+00	2.00E+01	4.13E-01	1.19E+00	2.38E+00	6.68E+00	2.11E+01	3.99E-01	1.22E+00	2.41E+00	6.81E+00	2.16E+01	3.93E-01	1.23E+00	2.42E+00	6.85E+00	2.18E+01	3.91E-01	1.23E+00	2.42E+00	6.85E+00
0.6	2.22E+00	1.06E+00	2.17E+00	5.69E+00	1.71E+01	4.77E-01	1.07E+00	2.18E+00	5.74E+00	1.73E+01	4.73E-01	1.12E+00	2.23E+00	5.98E+00	1.83E+01	4.57E-01	1.20E+00	2.32E+00	6.40E+00	1.99E+01	4.33E-01	1.30E+00	2.42E+00	6.84E+00	2.18E+01	4.11E-01	1.35E+00	2.47E+00	7.09E+00	2.28E+01	4.00E-01	1.38E+00	2.50E+00	7.23E+00	2.34E+01	3.94E-01	1.39E+00	2.51E+00	7.29E+00	2.37E+01	3.91E-01	1.39E+00	2.51E+00	7.31E+00	2.38E+01	3.91E-01	1.39E+00	2.51E+00	7.31E+00
0.6	2.19E+00	1.26E+00	2.35E+00	6.54E+00	2.05E+01	4.35E-01	1.28E+00	2.37E+00	6.60E+00	2.08E+01	4.32E-01	1.31E+00	2.40E+00	6.76E+00	2.14E+01	4.24E-01	1.37E+00	2.46E+00	7.03E+00	2.26E+01	4.11E-01	1.42E+00	2.51E+00	7.29E+00	2.37E+01	4.00E-01	1.45E+00	2.53E+00	7.42E+00	2.43E+01	3.95E-01	1.47E+00	2.55E+00	7.49E+00	2.46E+01	3.92E-01	1.47E+00	2.55E+00	7.52E+00	2.47E+01	3.91E-01	1.47E+00	2.55E+00	7.52E+00	2.47E+01	3.91E-01	1.47E+00	2.55E+00	7.52E+00
0.7	2.18E+00	1.41E+00	2.48E+00	7.16E+00	2.31E+01	4.10E-01	1.43E+00	2.49E+00	7.22E+00	2.34E+01	4.07E-01	1.44E+00	2.51E+00	7.30E+00	2.37E+01	4.04E-01	1.47E+00	2.53E+00	7.43E+00	2.43E+01	3.99E-01	1.50E+00	2.56E+00	7.54E+00	2.48E+01	3.94E-01	1.51E+00	2.57E+00	7.60E+00	2.50E+01	3.92E-01	1.51E+00	2.57E+00	7.62E+00	2.51E+01	3.91E-01	1.51E+00	2.57E+00	7.63E+00	2.52E+01	3.91E-01	1.52E+00	2.58E+00	7.63E+00	2.52E+01	3.91E-01	1.52E+00	2.58E+00	7.63E+00
0.7	2.17E+00	1.49E+00	2.54E+00	7.47E+00	2.45E+01	3.98E-01	1.50E+00	2.56E+00	7.54E+00	2.48E+01	3.96E-01	1.51E+00	2.56E+00	7.56E+00	2.49E+01	3.95E-01	1.51E+00	2.57E+00	7.60E+00	2.51E+01	3.93E-01	1.52E+00	2.58E+00	7.64E+00	2.52E+01	3.92E-01	1.53E+00	2.58E+00	7.66E+00	2.53E+01	3.91E-01	1.53E+00	2.58E+00	7.66E+00	2.53E+01	3.91E-01	1.53E+00	2.58E+00	7.67E+00	2.53E+01	3.91E-01	1.53E+00	2.58E+00	7.67E+00	2.54E+01	3.91E-01	1.53E+00	2.58E+00	7.67E+00
0.7	2.17E+00	1.52E+00	2.57E+00	7.60E+00	2.51E+01	3.94E-01	1.53E+00	2.58E+00	7.67E+00	2.54E+01	3.91E-01	1.53E+00	2.58E+00	7.67E+00	2.54E+01	3.91E-01	1.53E+00	2.58E+00	7.67E+00	2.54E+01	3.91E-01	1.53E+00	2.58E+00	7.68E+00	2.54E+01	3.91E-01	1.53E+00	2.58E+00	7.68E+00	2.54E+01	3.91E-01	1.53E+00	2.58E+00	7.68E+00	2.54E+01	3.91E-01	1.53E+00	2.58E+00	7.68E+00	2.54E+01	3.91E-01	1.53E+00	2.58E+00	7.68E+00	2.54E+01	3.91E-01	1.53E+00	2.58E+00	7.68E+00
0.8	2.17E+00	1.53E+00	2.58E+00	7.66E+00	2.53E+01	3.91E-01	1.54E+00	2.59E+00	7.73E+00	2.56E+01	3.89E-01	1.54E+00	2.59E+00	7.72E+00	2.56E+01	3.89E-01	1.54E+00	2.59E+00	7.70E+00	2.55E+01	3.90E-01	1.54E+00	2.59E+00	7.69E+00	2.55E+01	3.90E-01	1.54E+00	2.59E+00	7.69E+00	2.54E+01	3.90E-01	1.53E+00	2.59E+00	7.68E+00	2.54E+01	3.91E-01	1.53E+00	2.58E+00	7.68E+00	2.54E+01	3.91E-01	1.53E+00	2.58E+00	7.68E+00	2.54E+01	3.91E-01	1.53E+00	2.58E+00	7.68E+00
0.8	2.17E+00	1.53E+00	2.58E+00	7.68E+00	2.54E+01	3.91E-01	1.55E+00	2.60E+00	7.75E+00	2.57E+01	3.88E-01	1.55E+00	2.60E+00	7.73E+00	2.56E+01	3.89E-01	1.54E+00	2.59E+00	7.71E+00	2.56E+01	3.89E-01	1.54E+00	2.59E+00	7.69E+00	2.55E+01	3.90E-01	1.54E+00	2.59E+00	7.69E+00	2.54E+01	3.90E-01	1.53E+00	2.59E+00	7.68E+00	2.54E+01	3.91E-01	1.53E+00	2.59E+00	7.68E+00	2.54E+01	3.91E-01	1.53E+00	2.59E+00	7.68E+00	2.54E+01	3.91E-01	1.53E+00	2.58E+00	7.68E+00
0.8	2.17E+00	1.53E+00	2.58E+00	7.68E+00	2.54E+01	3.91E-01	1.55E+00	2.60E+00	7.75E+00	2.57E+01	3.88E-01	1.55E+00	2.60E+00	7.74E+00	2.57E+01	3.88E-01	1.54E+00	2.59E+00	7.72E+00	2.56E+01	3.89E-01	1.54E+00	2.59E+00	7.70E+00	2.55E+01	3.90E-01	1.54E+00	2.59E+00	7.69E+00	2.54E+01	3.90E-01	1.54E+00	2.59E+00	7.68E+00	2.54E+01	3.91E-01	1.53E+00	2.59E+00	7.68E+00	2.54E+01	3.91E-01	1.53E+00	2.59E+00	7.68E+00	2.54E+01	3.91E-01	1.53E+00	2.59E+00	7.68E+00
0.9	2.17E+00	1.53E+00	2.58E+00	7.68E+00	2.54E+01	3.91E-01	1.55E+00	2.60E+00	7.75E+00	2.57E+01	3.88E-01	1.55E+00	2.60E+00	7.74E+00	2.57E+01	3.88E-01	1.54E+00	2.59E+00	7.72E+00	2.56E+01	3.89E-01	1.54E+00	2.59E+00	7.70E+00	2.55E+01	3.90E-01	1.54E+00	2.59E+00	7.69E+00	2.54E+01	3.90E-01	1.54E+00	2.59E+00	7.68E+00	2.54E+01	3.91E-01	1.53E+00	2.59E+00	7.68E+00	2.54E+01	3.91E-01	1.53E+00	2.59E+00	7.68E+00	2.54E+01	3.91E-01	1.53E+00	2.59E+00	7.68E+00
0.9	2.17E+00	1.53E+00	2.59E+00	7.68E+00	2.54E+01	3.91E-01	1.55E+00	2.60E+00	7.75E+00	2.57E+01	3.88E-01	1.55E+00	2.60E+00	7.74E+00	2.57E+01	3.88E-01	1.54E+00	2.59E+00	7.72E+00	2.56E+01	3.89E-01	1.54E+00	2.59E+00	7.70E+00	2.55E+01	3.90E-01	1.54E+00	2.59E+00	7.69E+00	2.54E+01	3.90E-01	1.54E+00	2.59E+00	7.68E+00	2.54E+01	3.91E-01	1.53E+00	2.59E+00	7.68E+00	2.54E+01	3.91E-01	1.53E+00	2.59E+00	7.68E+00	2.54E+01	3.91E-01	1.53E+00	2.59E+00	7.68E+00
0.9	2.17E+00	1.53E+00	2.59E+00	7.68E+00	2.54E+01	3.91E-01	1.55E+00	2.60E+00	7.75E+00	2.57E+01	3.88E-01	1.55E+00	2.60E+00	7.74E+00	2.57E+01	3.88E-01	1.54E+00	2.59E+00	7.72E+00	2.56E+01	3.89E-01	1.54E+00	2.59E+00	7.70E+00	2.55E+01	3.90E-01	1.54E+00	2.59E+00	7.69E+00	2.54E+01	3.90E-01	1.54E+00	2.59E+00	7.68E+00	2.54E+01	3.91E-01	1.53E+00	2.59E+00	7.68E+00	2.54E+01	3.91E-01	1.53E+00	2.59E+00	7.68E+00	2.54E+01	3.91E-01	1.53E+00	2.59E+00	7.68E+00
0.99	2.17E+00	1.53E+00	2.59E+00	7.68E+00	2.54E+01	3.91E-01	1.55E+00	2.60E+00	7.75E+00	2.57E+01	3.88E-01	1.55E+00	2.60E+00	7.74E+00	2.57E+01	3.88E-01	1.54E+00	2.59E+00	7.72E+00	2.56E+01	3.89E-01	1.54E+00	2.59E+00	7.70E+00	2.55E+01	3.90E-01	1.54E+00	2.59E+00	7.69E+00	2.54E+01	3.90E-01	1.54E+00	2.59E+00	7.68E+00	2.54E+01	3.91E-01	1.53E+00	2.59E+00	7.68E+00	2.54E+01	3.91E-01	1.53E+00	2.59E+00	7.68E+00	2.54E+01	3.91E-01	1.53E+00	2.59E+00	7.68E+00
0.999	2.17E+00	1.53E+00	2.59E+00	7.68E+00	2.54E+01	3.91E-01	1.55E+00	2.60E+00	7.75E+00	2.57E+01	3.88E-01	1.55E+00	2.60E+00	7.74E+00	2.57E+01	3.88E-01	1.54E+00	2.59E+00	7.72E+00	2.56E+01	3.89E-01	1.54E+00	2.59E+00	7.70E+00	2.55E+01	3.90E-01	1.54E+00	2.59E+00	7.69E+00	2.54E+01	3.90E-01	1.54E+00	2.59E+00	7.68E+00	2.54E+01	3.91E-01	1.53E+00	2.59E+00	7.68E+00	2.54E+01	3.91E-01	1.53E+00	2.59E+00	7.68E+00	2.54E+01	3.91E-01	1.53E+00	2.59E+00	7.68E+00
1	2.17E+00	1.53E+00	2.59E+00	7.68E+00	2.54E+01	3.91E-01	1.55E+00	2.60E+00	7.75E+00	2.57E+01	3.88E-01	1.55E+00	2.60E+00	7.74E+00	2.57E+01	3.88E-01	1.54E+00	2.59E+00	7.72E+00	2.56E+01	3.89E-01	1.54E+00	2.59E+00	7.70E+00	2.55E+01	3.90E-01	1.54E+00	2.59E+00	7.69E+00	2.54E+01	3.90E-01	1.54E+00	2.59E+00	7.68E+00	2.54E+01	3.91E-01	1.53E+00	2.59E+00	7.68E+00	2.54E+01	3.91E-01	1.53E+00	2.59E+00	7.68E+00	2.54E+01	3.91E-01	1.53E+00	2.59E+00	7.68E+00
1	2.17E+00	1.53E+00	2.59E+00	7.68E+00	2.54E+01	3.91E-01	1.55E+00	2.60E+00	7.75E+00	2.57E+01	3.88E-01	1.55E+00	2.60E+00	7.74E+00	2.57E+01	3.88E-01	1.54E+00	2.59E+00	7.72E+00	2.56E+01	3.89E-01	1.54E+00	2.59E+00	7.70E+00	2.55E+01	3.90E-01	1.54E+00	2.59E+00	7.69E+00	2.54E+01	3.90E-01	1.54E+00	2.59E+00	7.68E+00	2.54E+01	3.91E-01	1.53E+00	2.59E+00	7.68E+00	2.54E+01	3.91E-01	1.53E+00	2.59E+00	7.68E+00	2.54E+01	3.91E-01	1.53E+00	2.59E+00	7.68E+00
1	2.17E+00	1.53E+00	2.59E+00	7.68E+00	2.54E+01	3.91E-01	1.55E+00	2.60E+00	7.75E+00	2.57E+01	3.88E-01	1.55E+00	2.60E+00	7.74E+00	2.57E+01	3.88E-01	1.54E+00	2.59E+00	7.72E+00	2.56E+01	3.89E-01	1.54E+00	2.59E+00	7.70E+00	2.55E+01	3.90E-01	1.54E+00	2.59E+00	7.69E+00	2.54E+01	3.90E-01	1.54E+00	2.59E+00	7.68E+00	2.54E+01	3.91E-01	1.53E+00	2.59E+00	7.68E+00	2.54E+01	3.91E-01	1.53E+00	2.59E+00	7.68E+00	2.54E+01	3.91E-01	1.53E+00	2.59E+00	7.68E+00
1	2.17E+00	1.53E+00	2.59E+00	7.68E+00	2.54E+01	3.91E-01	1.55E+00	2.60E+00	7.75E+00	2.57E+01	3.88E-01	1.55E+00	2.60E+00	7.74E+00	2.57E+01	3.88E-01	1.54E+00	2.59E+00	7.72E+00	2.56E+01	3.89E-01	1.54E+00	2.59E+00	7.70E+00	2.55E+01	3.90E-01	1.54E+00	2.59E+00	7.69E+00	2.54E+01	3.90E-01	1.54E+00	2.59E+00	7.68E+00	2.54E+01	3.91E-01	1.53E+00	2.59E+00	7.68E+00	2.54E+01	3.91E-01	1.53E+00	2.59E+00	7.68E+00	2.54E+01	3.91E-01	1.53E+00	2.59E+00	7.68E+00
1	2.17E+00	1.53E+00	2.59E+00	7.68E+00	2.54E+01	3.91E-01	1.55E+00	2.60E+00	7.75E+00	2.57E+01	3.88E-01	1.55E+00	2.60E+00	7.74E+00	2.57E+01	3.88E-01	1.54E+00	2.59E+00	7.72E+00	2.56E+01	3.89E-01	1.54E+00	2.59E+00	7.70E+00	2.55E+01	3.90E-01	1.54E+00	2.59E+00	7.69E+00	2.54E+01	3.90E-01	1.54E+00	2.59E+00	7.68E+00	2.54E+01	3.91E-01	1.53E+00	2.59E+00	7.68E+00	2.54E+01	3.91E-01	1.53E+00	2.59E+00	7.68E+00	2.54E+01	3.91E-01	1.53E+00	2.59E+00	7.68E+00
	r
	2.17E+00
The SU function was proposed by Johnson, N. L., 1949: Systems of frequency curves generated by methods of translation. Biometrika 36, 149-176.
At that time no feasible numerical method was available to find the parameters. A graphical abac was given.
SU	β32	β4	|β3|	helpfct	2.02E+00	Range β4>	3.27E+00
	1.53E-01	2.99E+00	3.91E-01	SU: P=	0.5*GAMMAI[{u+asinh(Y)}²/r; 0.5]			Johnson's SU: first 4 moments correct
Solving for parameters of SU				fault β3+β4	#VALUE!
Johnson:	2/(d*d)	g/d				1.00E-01		2.00E-01		4.00E-01		6.00E-01		6.00E-01		7.00E-01		7.00E-01		8.00E-01		8.00E-01		9.00E-01		9.00E-01		9.90E-01		9.99E-01		1.00E+00		1.00E+00		1.00E+00
	r	u	|β3|	u	|β3|	u	|β3|	u	|β3|	u	|β3|	u	|β3|	u	|β3|	u	|β3|	u	|β3|	u	|β3|	u	|β3|	u	|β3|	u	|β3|	u	|β3|	u	|β3|	u	|β3|	u	|β3|	u	µ'1	µ'2	µ'3	µ'4	µ'5	µ'6	delta |β3|	β4	dr/dβ4
	start r	start u		1.01*u1
	1.74E+00	-2.28E-02	1.63E-01	-2.31E-02	1.64E-01	-2.62E-02	1.87E-01	-3.20E-02	2.28E-01	-4.11E-02	2.93E-01	-4.94E-02	3.51E-01	-5.27E-02	3.75E-01	-5.42E-02	3.86E-01	-5.47E-02	3.89E-01	-5.49E-02	3.90E-01	-5.49E-02	3.91E-01	-5.49E-02	3.91E-01	-5.49E-02	3.91E-01	-5.49E-02	3.91E-01	-5.49E-02	3.91E-01	-5.49E-02	3.91E-01	-5.49E-02	3.91E-01	-5.49E-02	8.50E-02	2.38E+00	2.03E+00	1.35E+02			-5.67E-12	2.39E+01	1.00E+00
step	1.76E+00	-2.26E-02	1.63E-01	-2.28E-02	1.65E-01	-2.59E-02	1.88E-01	-3.16E-02	2.28E-01	-4.06E-02	2.93E-01	-4.87E-02	3.51E-01	-5.19E-02	3.75E-01	-5.34E-02	3.86E-01	-5.39E-02	3.89E-01	-5.41E-02	3.90E-01	-5.41E-02	3.91E-01	-5.41E-02	3.91E-01	-5.41E-02	3.91E-01	-5.41E-02	3.91E-01	-5.41E-02	3.91E-01	-5.41E-02	3.91E-01	-5.41E-02	3.91E-01	-5.41E-02	8.41E-02	2.43E+00	2.08E+00	1.44E+02			-5.65E-12	2.45E+01	2.55E-02
0.1	1.71E+00	-2.64E-02	1.82E-01	-2.67E-02	1.84E-01	-2.97E-02	2.05E-01	-3.51E-02	2.42E-01	-4.37E-02	3.01E-01	-5.15E-02	3.55E-01	-5.46E-02	3.76E-01	-5.61E-02	3.86E-01	-5.65E-02	3.89E-01	-5.67E-02	3.90E-01	-5.67E-02	3.91E-01	-5.67E-02	3.91E-01	-5.67E-02	3.91E-01	-5.67E-02	3.91E-01	-5.67E-02	3.91E-01	-5.67E-02	3.91E-01	-5.67E-02	3.91E-01	-5.67E-02	8.69E-02	2.27E+00	1.92E+00	1.16E+02			-5.18E-12	2.25E+01	2.64E-02
0.2	1.60E+00	-3.38E-02	2.13E-01	-3.42E-02	2.15E-01	-3.69E-02	2.33E-01	-4.20E-02	2.64E-01	-5.00E-02	3.15E-01	-5.72E-02	3.60E-01	-6.01E-02	3.78E-01	-6.15E-02	3.87E-01	-6.19E-02	3.89E-01	-6.20E-02	3.90E-01	-6.20E-02	3.91E-01	-6.20E-02	3.91E-01	-6.20E-02	3.91E-01	-6.20E-02	3.91E-01	-6.20E-02	3.91E-01	-6.20E-02	3.91E-01	-6.20E-02	3.91E-01	-6.20E-02	9.27E-02	2.00E+00	1.66E+00	7.66E+01			-4.39E-12	1.91E+01	3.05E-02
0.4	1.41E+00	-4.79E-02	2.54E-01	-4.84E-02	2.56E-01	-5.10E-02	2.69E-01	-5.56E-02	2.94E-01	-6.29E-02	3.32E-01	-6.96E-02	3.67E-01	-7.22E-02	3.81E-01	-7.35E-02	3.88E-01	-7.39E-02	3.90E-01	-7.40E-02	3.90E-01	-7.40E-02	3.91E-01	-7.40E-02	3.91E-01	-7.40E-02	3.91E-01	-7.40E-02	3.91E-01	-7.40E-02	3.91E-01	-7.40E-02	3.91E-01	-7.40E-02	3.91E-01	-7.40E-02	1.05E-01	1.56E+00	1.25E+00	3.46E+01			-3.37E-12	1.42E+01	4.00E-02
0.6	1.14E+00	-6.81E-02	2.79E-01	-6.88E-02	2.82E-01	-7.15E-02	2.93E-01	-7.63E-02	3.12E-01	-8.40E-02	3.44E-01	-9.09E-02	3.72E-01	-9.37E-02	3.83E-01	-9.50E-02	3.88E-01	-9.54E-02	3.90E-01	-9.55E-02	3.90E-01	-9.56E-02	3.91E-01	-9.56E-02	3.91E-01	-9.56E-02	3.91E-01	-9.56E-02	3.91E-01	-9.56E-02	3.91E-01	-9.56E-02	3.91E-01	-9.56E-02	3.91E-01	-9.56E-02	1.27E-01	1.09E+00	8.46E-01	1.15E+01			-2.73E-12	9.73E+00	6.05E-02
0.6	8.94E-01	-9.20E-02	2.92E-01	-9.30E-02	2.95E-01	-9.60E-02	3.05E-01	-1.01E-01	3.22E-01	-1.10E-01	3.49E-01	-1.18E-01	3.74E-01	-1.21E-01	3.84E-01	-1.23E-01	3.89E-01	-1.23E-01	3.90E-01	-1.23E-01	3.90E-01	-1.23E-01	3.91E-01	-1.23E-01	3.91E-01	-1.23E-01	3.91E-01	-1.23E-01	3.91E-01	-1.23E-01	3.91E-01	-1.23E-01	3.91E-01	-1.23E-01	3.91E-01	-1.23E-01	1.55E-01	7.60E-01	5.92E-01	4.14E+00			-2.41E-12	7.16E+00	9.50E-02
0.6	6.56E-01	-1.24E-01	2.97E-01	-1.25E-01	3.00E-01	-1.29E-01	3.09E-01	-1.36E-01	3.25E-01	-1.47E-01	3.51E-01	-1.57E-01	3.75E-01	-1.62E-01	3.84E-01	-1.63E-01	3.89E-01	-1.64E-01	3.90E-01	-1.64E-01	3.90E-01	-1.64E-01	3.91E-01	-1.64E-01	3.91E-01	-1.64E-01	3.91E-01	-1.64E-01	3.91E-01	-1.64E-01	3.91E-01	-1.64E-01	3.91E-01	-1.64E-01	3.91E-01	-1.64E-01	1.94E-01	5.16E-01	4.16E-01	1.47E+00			-2.30E-12	5.50E+00	1.44E-01
0.7	4.04E-01	-1.76E-01	2.87E-01	-1.77E-01	2.90E-01	-1.84E-01	3.00E-01	-1.95E-01	3.18E-01	-2.13E-01	3.47E-01	-2.30E-01	3.73E-01	-2.37E-01	3.83E-01	-2.40E-01	3.88E-01	-2.41E-01	3.90E-01	-2.42E-01	3.90E-01	-2.42E-01	3.91E-01	-2.42E-01	3.91E-01	-2.42E-01	3.91E-01	-2.42E-01	3.91E-01	-2.42E-01	3.91E-01	-2.42E-01	3.91E-01	-2.42E-01	3.91E-01	-2.42E-01	2.70E-01	3.38E-01	2.88E-01	4.83E-01			-2.62E-12	4.33E+00	2.15E-01
0.7	2.02E-01	-2.74E-01	2.82E-01	-2.77E-01	2.85E-01	-2.88E-01	2.95E-01	-3.08E-01	3.14E-01	-3.40E-01	3.44E-01	-3.69E-01	3.71E-01	-3.82E-01	3.83E-01	-3.88E-01	3.88E-01	-3.90E-01	3.90E-01	-3.90E-01	3.90E-01	-3.90E-01	3.91E-01	-3.90E-01	3.91E-01	-3.90E-01	3.91E-01	-3.90E-01	3.91E-01	-3.90E-01	3.91E-01	-3.90E-01	3.91E-01	-3.90E-01	3.91E-01	-3.90E-01	4.21E-01	3.08E-01	2.59E-01	2.65E-01			-2.92E-12	3.68E+00	3.10E-01
0.7	5.30E-02	-5.88E-01	2.64E-01	-5.94E-01	2.66E-01	-6.29E-01	2.78E-01	-6.93E-01	2.99E-01	-8.03E-01	3.32E-01	-9.22E-01	3.62E-01	-9.89E-01	3.77E-01	-1.03E+00	3.86E-01	-1.05E+00	3.89E-01	-1.06E+00	3.90E-01	-1.06E+00	3.90E-01	-1.06E+00	3.91E-01	-1.06E+00	3.91E-01	-1.06E+00	3.91E-01	-1.06E+00	3.91E-01	-1.06E+00	3.91E-01	-1.06E+00	3.91E-01	-1.06E+00	1.28E+00	1.71E+00	2.39E+00	3.46E+00			-7.10E-12	3.31E+00	4.08E-01
0.8	-5.22E-02	-9.65E-01	#VALUE!	-9.75E-01	#VALUE!	#VALUE!	#VALUE!	#VALUE!	#VALUE!	#VALUE!	#VALUE!	#VALUE!	#VALUE!	#VALUE!	#VALUE!	#VALUE!	#VALUE!	#VALUE!	#VALUE!	#VALUE!	#VALUE!	#VALUE!	#VALUE!	#VALUE!	#VALUE!	#VALUE!	#VALUE!	#VALUE!	#VALUE!	#VALUE!	#VALUE!	#VALUE!	#VALUE!	#VALUE!	#VALUE!	#VALUE!	#VALUE!	#VALUE!	#VALUE!	#VALUE!			#VALUE!	#VALUE!	#VALUE!
0.8	#VALUE!	#VALUE!	#VALUE!	#VALUE!	#VALUE!	#VALUE!	#VALUE!	#VALUE!	#VALUE!	#VALUE!	#VALUE!	#VALUE!	#VALUE!	#VALUE!	#VALUE!	#VALUE!	#VALUE!	#VALUE!	#VALUE!	#VALUE!	#VALUE!	#VALUE!	#VALUE!	#VALUE!	#VALUE!	#VALUE!	#VALUE!	#VALUE!	#VALUE!	#VALUE!	#VALUE!	#VALUE!	#VALUE!	#VALUE!	#VALUE!	#VALUE!	#VALUE!	#VALUE!	#VALUE!	#VALUE!			#VALUE!	#VALUE!	#VALUE!
0.8	#VALUE!	#VALUE!	#VALUE!	#VALUE!	#VALUE!	#VALUE!	#VALUE!	#VALUE!	#VALUE!	#VALUE!	#VALUE!	#VALUE!	#VALUE!	#VALUE!	#VALUE!	#VALUE!	#VALUE!	#VALUE!	#VALUE!	#VALUE!	#VALUE!	#VALUE!	#VALUE!	#VALUE!	#VALUE!	#VALUE!	#VALUE!	#VALUE!	#VALUE!	#VALUE!	#VALUE!	#VALUE!	#VALUE!	#VALUE!	#VALUE!	#VALUE!	#VALUE!	#VALUE!	#VALUE!	#VALUE!			#VALUE!	#VALUE!	#VALUE!
0.9	#VALUE!	#VALUE!	#VALUE!	#VALUE!	#VALUE!	#VALUE!	#VALUE!	#VALUE!	#VALUE!	#VALUE!	#VALUE!	#VALUE!	#VALUE!	#VALUE!	#VALUE!	#VALUE!	#VALUE!	#VALUE!	#VALUE!	#VALUE!	#VALUE!	#VALUE!	#VALUE!	#VALUE!	#VALUE!	#VALUE!	#VALUE!	#VALUE!	#VALUE!	#VALUE!	#VALUE!	#VALUE!	#VALUE!	#VALUE!	#VALUE!	#VALUE!	#VALUE!	#VALUE!	#VALUE!	#VALUE!			#VALUE!	#VALUE!	#VALUE!
0.9	#VALUE!	#VALUE!	#VALUE!	#VALUE!	#VALUE!	#VALUE!	#VALUE!	#VALUE!	#VALUE!	#VALUE!	#VALUE!	#VALUE!	#VALUE!	#VALUE!	#VALUE!	#VALUE!	#VALUE!	#VALUE!	#VALUE!	#VALUE!	#VALUE!	#VALUE!	#VALUE!	#VALUE!	#VALUE!	#VALUE!	#VALUE!	#VALUE!	#VALUE!	#VALUE!	#VALUE!	#VALUE!	#VALUE!	#VALUE!	#VALUE!	#VALUE!	#VALUE!	#VALUE!	#VALUE!	#VALUE!			#VALUE!	#VALUE!	#VALUE!
0.9	#VALUE!	#VALUE!	#VALUE!	#VALUE!	#VALUE!	#VALUE!	#VALUE!	#VALUE!	#VALUE!	#VALUE!	#VALUE!	#VALUE!	#VALUE!	#VALUE!	#VALUE!	#VALUE!	#VALUE!	#VALUE!	#VALUE!	#VALUE!	#VALUE!	#VALUE!	#VALUE!	#VALUE!	#VALUE!	#VALUE!	#VALUE!	#VALUE!	#VALUE!	#VALUE!	#VALUE!	#VALUE!	#VALUE!	#VALUE!	#VALUE!	#VALUE!	#VALUE!	#VALUE!	#VALUE!	#VALUE!			#VALUE!	#VALUE!	#VALUE!
0.99	#VALUE!	#VALUE!	#VALUE!	#VALUE!	#VALUE!	#VALUE!	#VALUE!	#VALUE!	#VALUE!	#VALUE!	#VALUE!	#VALUE!	#VALUE!	#VALUE!	#VALUE!	#VALUE!	#VALUE!	#VALUE!	#VALUE!	#VALUE!	#VALUE!	#VALUE!	#VALUE!	#VALUE!	#VALUE!	#VALUE!	#VALUE!	#VALUE!	#VALUE!	#VALUE!	#VALUE!	#VALUE!	#VALUE!	#VALUE!	#VALUE!	#VALUE!	#VALUE!	#VALUE!	#VALUE!	#VALUE!			#VALUE!	#VALUE!	#VALUE!
0.999	#VALUE!	#VALUE!	#VALUE!	#VALUE!	#VALUE!	#VALUE!	#VALUE!	#VALUE!	#VALUE!	#VALUE!	#VALUE!	#VALUE!	#VALUE!	#VALUE!	#VALUE!	#VALUE!	#VALUE!	#VALUE!	#VALUE!	#VALUE!	#VALUE!	#VALUE!	#VALUE!	#VALUE!	#VALUE!	#VALUE!	#VALUE!	#VALUE!	#VALUE!	#VALUE!	#VALUE!	#VALUE!	#VALUE!	#VALUE!	#VALUE!	#VALUE!	#VALUE!	#VALUE!	#VALUE!	#VALUE!			#VALUE!	#VALUE!	#VALUE!
1	#VALUE!	#VALUE!	#VALUE!	#VALUE!	#VALUE!	#VALUE!	#VALUE!	#VALUE!	#VALUE!	#VALUE!	#VALUE!	#VALUE!	#VALUE!	#VALUE!	#VALUE!	#VALUE!	#VALUE!	#VALUE!	#VALUE!	#VALUE!	#VALUE!	#VALUE!	#VALUE!	#VALUE!	#VALUE!	#VALUE!	#VALUE!	#VALUE!	#VALUE!	#VALUE!	#VALUE!	#VALUE!	#VALUE!	#VALUE!	#VALUE!	#VALUE!	#VALUE!	#VALUE!	#VALUE!	#VALUE!			#VALUE!	#VALUE!	#VALUE!
1	#VALUE!	#VALUE!	#VALUE!	#VALUE!	#VALUE!	#VALUE!	#VALUE!	#VALUE!	#VALUE!	#VALUE!	#VALUE!	#VALUE!	#VALUE!	#VALUE!	#VALUE!	#VALUE!	#VALUE!	#VALUE!	#VALUE!	#VALUE!	#VALUE!	#VALUE!	#VALUE!	#VALUE!	#VALUE!	#VALUE!	#VALUE!	#VALUE!	#VALUE!	#VALUE!	#VALUE!	#VALUE!	#VALUE!	#VALUE!	#VALUE!	#VALUE!	#VALUE!	#VALUE!	#VALUE!	#VALUE!			#VALUE!	#VALUE!	#VALUE!
1	#VALUE!	#VALUE!	#VALUE!	#VALUE!	#VALUE!	#VALUE!	#VALUE!	#VALUE!	#VALUE!	#VALUE!	#VALUE!	#VALUE!	#VALUE!	#VALUE!	#VALUE!	#VALUE!	#VALUE!	#VALUE!	#VALUE!	#VALUE!	#VALUE!	#VALUE!	#VALUE!	#VALUE!	#VALUE!	#VALUE!	#VALUE!	#VALUE!	#VALUE!	#VALUE!	#VALUE!	#VALUE!	#VALUE!	#VALUE!	#VALUE!	#VALUE!	#VALUE!	#VALUE!	#VALUE!	#VALUE!			#VALUE!	#VALUE!	#VALUE!
1	#VALUE!	#VALUE!	#VALUE!	#VALUE!	#VALUE!	#VALUE!	#VALUE!	#VALUE!	#VALUE!	#VALUE!	#VALUE!	#VALUE!	#VALUE!	#VALUE!	#VALUE!	#VALUE!	#VALUE!	#VALUE!	#VALUE!	#VALUE!	#VALUE!	#VALUE!	#VALUE!	#VALUE!	#VALUE!	#VALUE!	#VALUE!	#VALUE!	#VALUE!	#VALUE!	#VALUE!	#VALUE!	#VALUE!	#VALUE!	#VALUE!	#VALUE!	#VALUE!	#VALUE!	#VALUE!	#VALUE!			#VALUE!	#VALUE!	#VALUE!
1	#VALUE!	#VALUE!	#VALUE!	#VALUE!	#VALUE!	#VALUE!	#VALUE!	#VALUE!	#VALUE!	#VALUE!	#VALUE!	#VALUE!	#VALUE!	#VALUE!	#VALUE!	#VALUE!	#VALUE!	#VALUE!	#VALUE!	#VALUE!	#VALUE!	#VALUE!	#VALUE!	#VALUE!	#VALUE!	#VALUE!	#VALUE!	#VALUE!	#VALUE!	#VALUE!	#VALUE!	#VALUE!	#VALUE!	#VALUE!	#VALUE!	#VALUE!	#VALUE!	#VALUE!	#VALUE!	#VALUE!			#VALUE!	#VALUE!	#VALUE!
1	#VALUE!	#VALUE!	#VALUE!	#VALUE!	#VALUE!	#VALUE!	#VALUE!	#VALUE!	#VALUE!	#VALUE!	#VALUE!	#VALUE!	#VALUE!	#VALUE!	#VALUE!	#VALUE!	#VALUE!	#VALUE!	#VALUE!	#VALUE!	#VALUE!	#VALUE!	#VALUE!	#VALUE!	#VALUE!	#VALUE!	#VALUE!	#VALUE!	#VALUE!	#VALUE!	#VALUE!	#VALUE!	#VALUE!	#VALUE!	#VALUE!	#VALUE!	#VALUE!	#VALUE!	#VALUE!	#VALUE!			#VALUE!	#VALUE!	#VALUE!
1	#VALUE!	#VALUE!	#VALUE!	#VALUE!	#VALUE!	#VALUE!	#VALUE!	#VALUE!	#VALUE!	#VALUE!	#VALUE!	#VALUE!	#VALUE!	#VALUE!	#VALUE!	#VALUE!	#VALUE!	#VALUE!	#VALUE!	#VALUE!	#VALUE!	#VALUE!	#VALUE!	#VALUE!	#VALUE!	#VALUE!	#VALUE!	#VALUE!	#VALUE!	#VALUE!	#VALUE!	#VALUE!	#VALUE!	#VALUE!	#VALUE!	#VALUE!	#VALUE!	#VALUE!	#VALUE!	#VALUE!			#VALUE!	#VALUE!	#VALUE!
1	#VALUE!	#VALUE!	#VALUE!	#VALUE!	#VALUE!	#VALUE!	#VALUE!	#VALUE!	#VALUE!	#VALUE!	#VALUE!	#VALUE!	#VALUE!	#VALUE!	#VALUE!	#VALUE!	#VALUE!	#VALUE!	#VALUE!	#VALUE!	#VALUE!	#VALUE!	#VALUE!	#VALUE!	#VALUE!	#VALUE!	#VALUE!	#VALUE!	#VALUE!	#VALUE!	#VALUE!	#VALUE!	#VALUE!	#VALUE!	#VALUE!	#VALUE!	#VALUE!	#VALUE!	#VALUE!	#VALUE!			#VALUE!	#VALUE!	#VALUE!
1	#VALUE!	#VALUE!	#VALUE!	#VALUE!	#VALUE!	#VALUE!	#VALUE!	#VALUE!	#VALUE!	#VALUE!	#VALUE!	#VALUE!	#VALUE!	#VALUE!	#VALUE!	#VALUE!	#VALUE!	#VALUE!	#VALUE!	#VALUE!	#VALUE!	#VALUE!	#VALUE!	#VALUE!	#VALUE!	#VALUE!	#VALUE!	#VALUE!	#VALUE!	#VALUE!	#VALUE!	#VALUE!	#VALUE!	#VALUE!	#VALUE!	#VALUE!	#VALUE!	#VALUE!	#VALUE!	#VALUE!			#VALUE!	#VALUE!	#VALUE!
1	#VALUE!	#VALUE!	#VALUE!	#VALUE!	#VALUE!	#VALUE!	#VALUE!	#VALUE!	#VALUE!	#VALUE!	#VALUE!	#VALUE!	#VALUE!	#VALUE!	#VALUE!	#VALUE!	#VALUE!	#VALUE!	#VALUE!	#VALUE!	#VALUE!	#VALUE!	#VALUE!	#VALUE!	#VALUE!	#VALUE!	#VALUE!	#VALUE!	#VALUE!	#VALUE!	#VALUE!	#VALUE!	#VALUE!	#VALUE!	#VALUE!	#VALUE!	#VALUE!	#VALUE!	#VALUE!	#VALUE!			#VALUE!	#VALUE!	#VALUE!
1	#VALUE!	#VALUE!	#VALUE!	#VALUE!	#VALUE!	#VALUE!	#VALUE!	#VALUE!	#VALUE!	#VALUE!	#VALUE!	#VALUE!	#VALUE!	#VALUE!	#VALUE!	#VALUE!	#VALUE!	#VALUE!	#VALUE!	#VALUE!	#VALUE!	#VALUE!	#VALUE!	#VALUE!	#VALUE!	#VALUE!	#VALUE!	#VALUE!	#VALUE!	#VALUE!	#VALUE!	#VALUE!	#VALUE!	#VALUE!	#VALUE!	#VALUE!	#VALUE!	#VALUE!	#VALUE!	#VALUE!			#VALUE!	#VALUE!	#VALUE!
1	#VALUE!	#VALUE!	#VALUE!	#VALUE!	#VALUE!	#VALUE!	#VALUE!	#VALUE!	#VALUE!	#VALUE!	#VALUE!	#VALUE!	#VALUE!	#VALUE!	#VALUE!	#VALUE!	#VALUE!	#VALUE!	#VALUE!	#VALUE!	#VALUE!	#VALUE!	#VALUE!	#VALUE!	#VALUE!	#VALUE!	#VALUE!	#VALUE!	#VALUE!	#VALUE!	#VALUE!	#VALUE!	#VALUE!	#VALUE!	#VALUE!	#VALUE!	#VALUE!	#VALUE!	#VALUE!	#VALUE!			#VALUE!	#VALUE!	#VALUE!
1	#VALUE!	#VALUE!	#VALUE!	#VALUE!	#VALUE!	#VALUE!	#VALUE!	#VALUE!	#VALUE!	#VALUE!	#VALUE!	#VALUE!	#VALUE!	#VALUE!	#VALUE!	#VALUE!	#VALUE!	#VALUE!	#VALUE!	#VALUE!	#VALUE!	#VALUE!	#VALUE!	#VALUE!	#VALUE!	#VALUE!	#VALUE!	#VALUE!	#VALUE!	#VALUE!	#VALUE!	#VALUE!	#VALUE!	#VALUE!	#VALUE!	#VALUE!	#VALUE!	#VALUE!	#VALUE!	#VALUE!			#VALUE!	#VALUE!	#VALUE!
1	#VALUE!	#VALUE!	#VALUE!	#VALUE!	#VALUE!	#VALUE!	#VALUE!	#VALUE!	#VALUE!	#VALUE!	#VALUE!	#VALUE!	#VALUE!	#VALUE!	#VALUE!	#VALUE!	#VALUE!	#VALUE!	#VALUE!	#VALUE!	#VALUE!	#VALUE!	#VALUE!	#VALUE!	#VALUE!	#VALUE!	#VALUE!	#VALUE!	#VALUE!	#VALUE!	#VALUE!	#VALUE!	#VALUE!	#VALUE!	#VALUE!	#VALUE!	#VALUE!	#VALUE!	#VALUE!	#VALUE!			#VALUE!	#VALUE!	#VALUE!
1	#VALUE!	#VALUE!	#VALUE!	#VALUE!	#VALUE!	#VALUE!	#VALUE!	#VALUE!	#VALUE!	#VALUE!	#VALUE!	#VALUE!	#VALUE!	#VALUE!	#VALUE!	#VALUE!	#VALUE!	#VALUE!	#VALUE!	#VALUE!	#VALUE!	#VALUE!	#VALUE!	#VALUE!	#VALUE!	#VALUE!	#VALUE!	#VALUE!	#VALUE!	#VALUE!	#VALUE!	#VALUE!	#VALUE!	#VALUE!	#VALUE!	#VALUE!	#VALUE!	#VALUE!	#VALUE!	#VALUE!	#VALUE!	#VALUE!	#VALUE!	#VALUE!
	r																																			u	µ'1	µ'2	µ'3	µ'4	µ'5	β3	β4	β5	β6
	#VALUE!																																			#VALUE!	#VALUE!	#VALUE!	#VALUE!	#VALUE!	#VALUE!	#VALUE!	#VALUE!	#VALUE!	#VALUE!
																																										d=	c=	solutions?	Min:
																																						#VALUE!				#VALUE!	#VALUE!	#VALUE!	1.00E+00
																																												#VALUE!
LN	β32		|β3|
	1.53E-01		3.91E-01	LN: P=	0.5*GAMMAI[LN(Y)²/r; 0.5]
Solving for parameters of LN
				β4(β3)=	3.27E+00	helpfct.	2.02E+00
																	0.00E+00
																	b5	Criteria	BE+G4
[truncated: 2 more columns]
